# Supplementary material for: Exosomal MicroRNAs modulate the cognitive function in fasudil treated APPswe/PSEN1dE9 transgenic (APP/PS1) mice model of Alzheimer's disease
Source: Research Square preprint supplement (doi:10.21203/rs.3.rs-1895492/v1), 2022-08-08
Supplement: Supplementary file 1 [file 13971d0eebc2c61551c0191f.xlsx]

## Sheet: Rawdata_Summary
Rawdata_Summary
Sample	Raw Reads	Bases	Error_rate	Q20	Q30	GC_content	clean reads
WT_A	10114488	0.759G	0.0009	0.8538	0.749	0.3714	3765627
WT_B	15649992	1.174G	0.0014	0.8126	0.7129	0.3563	3164192
ADNS_A	12170574	0.913G	0.001	0.8474	0.7366	0.39	3151328
ADNS_B	15584627	1.169G	0.0014	0.8106	0.7073	0.3196	2918508
ADF_A	12046496	0.903G	0.0009	0.8491	0.7444	0.3865	3587425
ADF_B	10480737	0.786G	0.0009	0.8597	0.754	0.41	3833080
