# Supplementary material for: Exosomal MicroRNAs modulate the cognitive function in fasudil treated APPswe/PSEN1dE9 transgenic (APP/PS1) mice model of Alzheimer's disease
Source: Research Square preprint supplement (doi:10.21203/rs.3.rs-1895492/v1), 2022-08-08
Supplement: Supplementary file 2 [file 20da13ff07e3e4f2672076c3.xlsx]

## Sheet: WT_vs_ADNS.DElist_target
miRNA	genename	ID
mmu-let-7i-5p	Apc2	ENSMUSG00000020135
mmu-let-7i-5p	Armc2	ENSMUSG00000071324
mmu-let-7i-5p	Atp2b2	ENSMUSG00000030302
mmu-let-7i-5p	Col1a2	ENSMUSG00000029661
mmu-let-7i-5p	Cts8	ENSMUSG00000057446
mmu-let-7i-5p	Fbxl14	ENSMUSG00000030019
mmu-let-7i-5p	Gnl3l	ENSMUSG00000025266
mmu-let-7i-5p	Ifnar1	ENSMUSG00000022967
mmu-let-7i-5p	Il6	ENSMUSG00000025746
mmu-let-7i-5p	Lins1	ENSMUSG00000053091
mmu-let-7i-5p	Meis2	ENSMUSG00000027210
mmu-let-7i-5p	Msi2	ENSMUSG00000069769
mmu-let-7i-5p	Mup11	ENSMUSG00000073834
mmu-let-7i-5p	Mup17	ENSMUSG00000096688
mmu-let-7i-5p	Nf2	ENSMUSG00000009073
mmu-let-7i-5p	Nup214	ENSMUSG00000001855
mmu-let-7i-5p	Tnfrsf26	ENSMUSG00000045362
mmu-let-7i-5p	Zfp444	ENSMUSG00000044876
mmu-miR-126a-3p	Adam9	ENSMUSG00000031555
mmu-miR-126a-3p	Dnmt1	ENSMUSG00000004099
mmu-miR-126a-3p	Errfi1	ENSMUSG00000028967
mmu-miR-126a-3p	Fzd7	ENSMUSG00000041075
mmu-miR-126a-3p	Hoxa9	ENSMUSG00000038227
mmu-miR-126a-3p	Irs1	ENSMUSG00000055980
mmu-miR-126a-3p	Itga11	ENSMUSG00000032243
mmu-miR-126a-3p	Pik3r2	ENSMUSG00000031834
mmu-miR-126a-3p	Runx1	ENSMUSG00000022952
mmu-miR-126a-3p	Sfpi1	ENSMUSG00000002111
mmu-miR-126a-3p	Spred1	ENSMUSG00000027351
mmu-miR-126a-3p	Ston1	ENSMUSG00000033855
mmu-miR-126a-3p	Tal1	ENSMUSG00000028717
mmu-miR-126a-3p	Vegfa	ENSMUSG00000023951
mmu-miR-140-3p	Fn1	ENSMUSG00000026193
mmu-miR-140-3p	Pou3f3	ENSMUSG00000045515
mmu-miR-140-3p	Smad2	ENSMUSG00000024563
mmu-miR-142a-3p	Adcy9	ENSMUSG00000005580
mmu-miR-142a-3p	Akr1d1	ENSMUSG00000038641
mmu-miR-142a-3p	Arntl	ENSMUSG00000055116
mmu-miR-142a-3p	AW549877	ENSMUSG00000041935
mmu-miR-142a-3p	Cd2ap	ENSMUSG00000061665
mmu-miR-142a-3p	Egfl6	ENSMUSG00000000402
mmu-miR-142a-3p	Hmgb1	ENSMUSG00000066551
mmu-miR-142a-3p	Homez	ENSMUSG00000057156
mmu-miR-142a-3p	Il6	ENSMUSG00000025746
mmu-miR-142a-3p	Il6st	ENSMUSG00000021756
mmu-miR-142a-3p	Irak1	ENSMUSG00000031392
mmu-miR-142a-3p	Lnpk	ENSMUSG00000009207
mmu-miR-142a-3p	Olr1	ENSMUSG00000030162
mmu-miR-142a-3p	Sema6a	ENSMUSG00000019647
mmu-miR-142a-3p	Shc4	ENSMUSG00000035109
mmu-miR-142a-3p	Smarca2	ENSMUSG00000024921
mmu-miR-142a-3p	Zfp949	ENSMUSG00000032425
mmu-miR-144-3p	4930539E08Rik	ENSMUSG00000048905
mmu-miR-144-3p	Abca1	ENSMUSG00000015243
mmu-miR-144-3p	Bsn	ENSMUSG00000032589
mmu-miR-144-3p	Cab39	ENSMUSG00000036707
mmu-miR-144-3p	Car10	ENSMUSG00000056158
mmu-miR-144-3p	Cdc42ep3	ENSMUSG00000036533
mmu-miR-144-3p	Cebpa	ENSMUSG00000034957
mmu-miR-144-3p	Enpp6	ENSMUSG00000038173
mmu-miR-144-3p	Gja5	ENSMUSG00000057123
mmu-miR-144-3p	Hdgfl3	ENSMUSG00000025104
mmu-miR-144-3p	Hif1a	ENSMUSG00000021109
mmu-miR-144-3p	Lifr	ENSMUSG00000054263
mmu-miR-144-3p	Lrig2	ENSMUSG00000032913
mmu-miR-144-3p	Map7d1	ENSMUSG00000028849
mmu-miR-144-3p	Mapre1	ENSMUSG00000027479
mmu-miR-144-3p	Prkaa1	ENSMUSG00000050697
mmu-miR-144-3p	Pten	ENSMUSG00000013663
mmu-miR-144-3p	Ptp4a3	ENSMUSG00000059895
mmu-miR-144-3p	Rcor3	ENSMUSG00000037395
mmu-miR-144-3p	Spred1	ENSMUSG00000027351
mmu-miR-144-3p	Sptbn1	ENSMUSG00000020315
mmu-miR-144-3p	Traf6	ENSMUSG00000027164
mmu-miR-144-3p	Uba1y	ENSMUSG00000069053
mmu-miR-144-3p	Unc5c	ENSMUSG00000059921
mmu-miR-144-3p	Zbtb34	ENSMUSG00000068966
mmu-miR-16-5p	Angel1	ENSMUSG00000021257
mmu-miR-16-5p	App	ENSMUSG00000022892
mmu-miR-16-5p	Arl2	ENSMUSG00000024944
mmu-miR-16-5p	Armcx6	ENSMUSG00000050394
mmu-miR-16-5p	Bcl11b	ENSMUSG00000048251
mmu-miR-16-5p	Bcl2	ENSMUSG00000057329
mmu-miR-16-5p	Bcl2l2	ENSMUSG00000089682
mmu-miR-16-5p	Bicd1	ENSMUSG00000003452
mmu-miR-16-5p	Bri3bp	ENSMUSG00000037905
mmu-miR-16-5p	Cadm1	ENSMUSG00000032076
mmu-miR-16-5p	Ccnd1	ENSMUSG00000070348
mmu-miR-16-5p	Ccne1	ENSMUSG00000002068
mmu-miR-16-5p	Ccnt2	ENSMUSG00000026349
mmu-miR-16-5p	Cd274	ENSMUSG00000016496
mmu-miR-16-5p	Cd40	ENSMUSG00000017652
mmu-miR-16-5p	Creb5	ENSMUSG00000053007
mmu-miR-16-5p	Ddx19b	ENSMUSG00000033658
mmu-miR-16-5p	Dhdh	ENSMUSG00000011382
mmu-miR-16-5p	Erlin2	ENSMUSG00000031483
mmu-miR-16-5p	Fbxo21	ENSMUSG00000032898
mmu-miR-16-5p	Fgd4	ENSMUSG00000022788
mmu-miR-16-5p	Fgf2	ENSMUSG00000037225
mmu-miR-16-5p	Idua	ENSMUSG00000033540
mmu-miR-16-5p	Irgq	ENSMUSG00000041037
mmu-miR-16-5p	Itgav	ENSMUSG00000027087
mmu-miR-16-5p	Jag1	ENSMUSG00000027276
mmu-miR-16-5p	Jun	ENSMUSG00000052684
mmu-miR-16-5p	Klc1	ENSMUSG00000021288
mmu-miR-16-5p	Lpcat2b	ENSMUSG00000033794
mmu-miR-16-5p	Mapkap1	ENSMUSG00000038696
mmu-miR-16-5p	Mdm4	ENSMUSG00000054387
mmu-miR-16-5p	Ncl	ENSMUSG00000026234
mmu-miR-16-5p	Pacsin2	ENSMUSG00000016664
mmu-miR-16-5p	Plpp3	ENSMUSG00000028517
mmu-miR-16-5p	Pomk	ENSMUSG00000037251
mmu-miR-16-5p	Rnf168	ENSMUSG00000014074
mmu-miR-16-5p	Slc6a4	ENSMUSG00000020838
mmu-miR-16-5p	Sorcs2	ENSMUSG00000029093
mmu-miR-16-5p	Spsb4	ENSMUSG00000046997
mmu-miR-16-5p	Tacc1	ENSMUSG00000065954
mmu-miR-16-5p	Tifab	ENSMUSG00000049625
mmu-miR-16-5p	Trim2	ENSMUSG00000027993
mmu-miR-16-5p	Vegfa	ENSMUSG00000023951
mmu-miR-16-5p	Wnt3a	ENSMUSG00000009900
mmu-miR-1903	A830018L16Rik	ENSMUSG00000057715
mmu-miR-1903	Agl	ENSMUSG00000033400
mmu-miR-1903	Baz1b	ENSMUSG00000002748
mmu-miR-1903	Btbd9	ENSMUSG00000062202
mmu-miR-1903	Cplx2	ENSMUSG00000025867
mmu-miR-1903	Dcc	ENSMUSG00000060534
mmu-miR-1903	Dgkg	ENSMUSG00000022861
mmu-miR-1903	Dusp26	ENSMUSG00000039661
mmu-miR-1903	Emp2	ENSMUSG00000022505
mmu-miR-1903	Gcm1	ENSMUSG00000023333
mmu-miR-1903	Gpnmb	ENSMUSG00000029816
mmu-miR-1903	Gpr146	ENSMUSG00000044197
mmu-miR-1903	Htr3b	ENSMUSG00000008590
mmu-miR-1903	Iigp1	ENSMUSG00000054072
mmu-miR-1903	Lpin1	ENSMUSG00000020593
mmu-miR-1903	Metap2	ENSMUSG00000036112
mmu-miR-1903	Nab1	ENSMUSG00000002881
mmu-miR-1903	Nbl1	ENSMUSG00000041120
mmu-miR-1903	Nhlh2	ENSMUSG00000048540
mmu-miR-1903	Ntm	ENSMUSG00000059974
mmu-miR-1903	Pbx2	ENSMUSG00000034673
mmu-miR-1903	Pigr	ENSMUSG00000026417
mmu-miR-1903	Prlr	ENSMUSG00000005268
mmu-miR-1903	Ptpro	ENSMUSG00000030223
mmu-miR-1903	Rab3c	ENSMUSG00000021700
mmu-miR-1903	Rgs17	ENSMUSG00000019775
mmu-miR-1903	Rs1	ENSMUSG00000031293
mmu-miR-1903	Sec14l3	ENSMUSG00000054986
mmu-miR-1903	Serpinb1c	ENSMUSG00000079049
mmu-miR-1903	Sh2d4a	ENSMUSG00000053886
mmu-miR-1903	Slc22a12	ENSMUSG00000061742
mmu-miR-1903	Slc7a13	ENSMUSG00000041052
mmu-miR-1903	Steap4	ENSMUSG00000012428
mmu-miR-1903	Synj2bp	ENSMUSG00000090935
mmu-miR-1903	Tango6	ENSMUSG00000041949
mmu-miR-1903	Tmprss11e	ENSMUSG00000054537
mmu-miR-1903	Tnfsf15	ENSMUSG00000050395
mmu-miR-1903	Trabd2b	ENSMUSG00000070867
mmu-miR-1903	Ttll7	ENSMUSG00000036745
mmu-miR-1903	Unc5d	ENSMUSG00000063626
mmu-miR-1903	Vash1	ENSMUSG00000021256
mmu-miR-1903	Zfp300	ENSMUSG00000031079
mmu-miR-19a-3p	Acadm	ENSMUSG00000062908
mmu-miR-19a-3p	Akap2	ENSMUSG00000090053
mmu-miR-19a-3p	Atp10a	ENSMUSG00000025324
mmu-miR-19a-3p	Atxn1	ENSMUSG00000046876
mmu-miR-19a-3p	Chrna7	ENSMUSG00000030525
mmu-miR-19a-3p	Chrnd	ENSMUSG00000026251
mmu-miR-19a-3p	Fam104a	ENSMUSG00000041629
mmu-miR-19a-3p	Fam83d	ENSMUSG00000027654
mmu-miR-19a-3p	Fgfr1op2	ENSMUSG00000040242
mmu-miR-19a-3p	Fzd4	ENSMUSG00000049791
mmu-miR-19a-3p	Gja3	ENSMUSG00000048582
mmu-miR-19a-3p	Ilf3	ENSMUSG00000032178
mmu-miR-19a-3p	Kdm2a	ENSMUSG00000054611
mmu-miR-19a-3p	Lrp6	ENSMUSG00000030201
mmu-miR-19a-3p	Map3k12	ENSMUSG00000023050
mmu-miR-19a-3p	Nat8f2	ENSMUSG00000033634
mmu-miR-19a-3p	Nat8f4	ENSMUSG00000068299
mmu-miR-19a-3p	Nhsl1	ENSMUSG00000039835
mmu-miR-19a-3p	Pten	ENSMUSG00000013663
mmu-miR-19a-3p	PTEN	ENSMUSG00000013663
mmu-miR-19a-3p	Rnf11	ENSMUSG00000028557
mmu-miR-19a-3p	Slc35f1	ENSMUSG00000038602
mmu-miR-19a-3p	Snap25	ENSMUSG00000027273
mmu-miR-19a-3p	Snx27	ENSMUSG00000028136
mmu-miR-19a-3p	Tet2	ENSMUSG00000040943
mmu-miR-19a-3p	Timp2	ENSMUSG00000017466
mmu-miR-19a-3p	Tmem25	ENSMUSG00000002032
mmu-miR-19a-3p	Tnf	ENSMUSG00000024401
mmu-miR-19a-3p	Ttc39b	ENSMUSG00000038172
mmu-miR-19a-3p	Ubap2l	ENSMUSG00000042520
mmu-miR-19a-3p	Zfpm2	ENSMUSG00000022306
mmu-miR-1a-3p	Acta1	ENSMUSG00000031972
mmu-miR-1a-3p	Adar	ENSMUSG00000027951
mmu-miR-1a-3p	Anxa5	ENSMUSG00000027712
mmu-miR-1a-3p	Bdnf	ENSMUSG00000048482
mmu-miR-1a-3p	Calm1	ENSMUSG00000001175
mmu-miR-1a-3p	Calm2	ENSMUSG00000036438
mmu-miR-1a-3p	Cdc42	ENSMUSG00000006699
mmu-miR-1a-3p	Cdk9	ENSMUSG00000009555
mmu-miR-1a-3p	Clcn3	ENSMUSG00000004319
mmu-miR-1a-3p	Cpeb1	ENSMUSG00000025586
mmu-miR-1a-3p	Ets1	ENSMUSG00000032035
mmu-miR-1a-3p	Fn1	ENSMUSG00000026193
mmu-miR-1a-3p	Fzd7	ENSMUSG00000041075
mmu-miR-1a-3p	Gata4	ENSMUSG00000021944
mmu-miR-1a-3p	Gja1	ENSMUSG00000050953
mmu-miR-1a-3p	GTF2B	ENSMUSG00000028271
mmu-miR-1a-3p	Hand2	ENSMUSG00000038193
mmu-miR-1a-3p	Hdac4	ENSMUSG00000026313
mmu-miR-1a-3p	Hes1	ENSMUSG00000022528
mmu-miR-1a-3p	Hspa1b	ENSMUSG00000090877
mmu-miR-1a-3p	Hspd1	ENSMUSG00000025980
mmu-miR-1a-3p	Igf1	ENSMUSG00000020053
mmu-miR-1a-3p	Igf1r	ENSMUSG00000005533
mmu-miR-1a-3p	Irx5	ENSMUSG00000031737
mmu-miR-1a-3p	Klf4	ENSMUSG00000003032
mmu-miR-1a-3p	Map4k3	ENSMUSG00000024242
mmu-miR-1a-3p	Mef2a	ENSMUSG00000030557
mmu-miR-1a-3p	Meox2	ENSMUSG00000036144
mmu-miR-1a-3p	Mkl1	ENSMUSG00000042292
mmu-miR-1a-3p	Mup10	ENSMUSG00000078680
mmu-miR-1a-3p	Mup11	ENSMUSG00000073834
mmu-miR-1a-3p	Mup12	ENSMUSG00000094793
mmu-miR-1a-3p	Mup14	ENSMUSG00000073830
mmu-miR-1a-3p	Mup17	ENSMUSG00000096688
mmu-miR-1a-3p	Mup19	ENSMUSG00000078673
mmu-miR-1a-3p	Myh6	ENSMUSG00000040752
mmu-miR-1a-3p	Myocd	ENSMUSG00000020542
mmu-miR-1a-3p	Nfat5	ENSMUSG00000003847
mmu-miR-1a-3p	Nppa	ENSMUSG00000041616
mmu-miR-1a-3p	Pax3	ENSMUSG00000004872
mmu-miR-1a-3p	Pax7	ENSMUSG00000028736
mmu-miR-1a-3p	Pola1	ENSMUSG00000006678
mmu-miR-1a-3p	Rarb	ENSMUSG00000017491
mmu-miR-1a-3p	Rasa1	ENSMUSG00000021549
mmu-miR-1a-3p	Rheb	ENSMUSG00000028945
mmu-miR-1a-3p	Rnf170	ENSMUSG00000013878
mmu-miR-1a-3p	Rps6	ENSMUSG00000028495
mmu-miR-1a-3p	Sh3bgrl	ENSMUSG00000031246
mmu-miR-1a-3p	Smarcb1	ENSMUSG00000000902
mmu-miR-1a-3p	Smarcd2	ENSMUSG00000078619
mmu-miR-1a-3p	Srf	ENSMUSG00000015605
mmu-miR-1a-3p	Tgoln1	ENSMUSG00000056429
mmu-miR-1a-3p	Tlx2	ENSMUSG00000068327
mmu-miR-1a-3p	Ucp2	ENSMUSG00000033685
mmu-miR-1b-5p	1110059G10Rik	ENSMUSG00000032551
mmu-miR-1b-5p	A630001G21Rik	ENSMUSG00000052760
mmu-miR-1b-5p	Acot11	ENSMUSG00000034853
mmu-miR-1b-5p	Acvr2a	ENSMUSG00000052155
mmu-miR-1b-5p	Ado	ENSMUSG00000057134
mmu-miR-1b-5p	AI429214	ENSMUSG00000074384
mmu-miR-1b-5p	Akap7	ENSMUSG00000039166
mmu-miR-1b-5p	Arl15	ENSMUSG00000042348
mmu-miR-1b-5p	Atf2	ENSMUSG00000027104
mmu-miR-1b-5p	Atp7a	ENSMUSG00000033792
mmu-miR-1b-5p	B3gnt2	ENSMUSG00000051650
mmu-miR-1b-5p	BC003965	ENSMUSG00000067722
mmu-miR-1b-5p	Bpifc	ENSMUSG00000050108
mmu-miR-1b-5p	Bsn	ENSMUSG00000032589
mmu-miR-1b-5p	Casp8	ENSMUSG00000026029
mmu-miR-1b-5p	Ccdc138	ENSMUSG00000038010
mmu-miR-1b-5p	Ccdc169	ENSMUSG00000048655
mmu-miR-1b-5p	Ccna2	ENSMUSG00000027715
mmu-miR-1b-5p	Ccpg1	ENSMUSG00000034563
mmu-miR-1b-5p	Cd28	ENSMUSG00000026012
mmu-miR-1b-5p	Cds2	ENSMUSG00000058793
mmu-miR-1b-5p	Chek1	ENSMUSG00000032113
mmu-miR-1b-5p	Chic1	ENSMUSG00000031327
mmu-miR-1b-5p	Cisd2	ENSMUSG00000028165
mmu-miR-1b-5p	Csnk1g3	ENSMUSG00000073563
mmu-miR-1b-5p	Csrnp3	ENSMUSG00000044647
mmu-miR-1b-5p	Cwf19l2	ENSMUSG00000025898
mmu-miR-1b-5p	Cysltr1	ENSMUSG00000052821
mmu-miR-1b-5p	Dtna	ENSMUSG00000024302
mmu-miR-1b-5p	Dzank1	ENSMUSG00000037259
mmu-miR-1b-5p	E2f1	ENSMUSG00000027490
mmu-miR-1b-5p	Ephb3	ENSMUSG00000005958
mmu-miR-1b-5p	Etfbkmt	ENSMUSG00000039958
mmu-miR-1b-5p	Fam169b	ENSMUSG00000074071
mmu-miR-1b-5p	Fbxl14	ENSMUSG00000030019
mmu-miR-1b-5p	Fbxo45	ENSMUSG00000035764
mmu-miR-1b-5p	Foxk1	ENSMUSG00000056493
mmu-miR-1b-5p	Frmd6	ENSMUSG00000048285
mmu-miR-1b-5p	Gabpb2	ENSMUSG00000038766
mmu-miR-1b-5p	Gabra2	ENSMUSG00000000560
mmu-miR-1b-5p	Gfod1	ENSMUSG00000051335
mmu-miR-1b-5p	Haus2	ENSMUSG00000027285
mmu-miR-1b-5p	Hist1h1d	ENSMUSG00000052565
mmu-miR-1b-5p	Hoxd1	ENSMUSG00000042448
mmu-miR-1b-5p	Htt	ENSMUSG00000029104
mmu-miR-1b-5p	Iars2	ENSMUSG00000026618
mmu-miR-1b-5p	Il15ra	ENSMUSG00000023206
mmu-miR-1b-5p	Iws1	ENSMUSG00000024384
mmu-miR-1b-5p	Lhfpl4	ENSMUSG00000042873
mmu-miR-1b-5p	Lin28b	ENSMUSG00000063804
mmu-miR-1b-5p	Loxl3	ENSMUSG00000000693
mmu-miR-1b-5p	Lrrc75b	ENSMUSG00000046807
mmu-miR-1b-5p	Mavs	ENSMUSG00000037523
mmu-miR-1b-5p	Mtf1	ENSMUSG00000028890
mmu-miR-1b-5p	Nacc2	ENSMUSG00000026932
mmu-miR-1b-5p	Nras	ENSMUSG00000027852
mmu-miR-1b-5p	Nxpe3	ENSMUSG00000075033
mmu-miR-1b-5p	Oip5	ENSMUSG00000072980
mmu-miR-1b-5p	Pdxk	ENSMUSG00000032788
mmu-miR-1b-5p	Pgm2l1	ENSMUSG00000030729
mmu-miR-1b-5p	Pik3ca	ENSMUSG00000027665
mmu-miR-1b-5p	Pitpnb	ENSMUSG00000050017
mmu-miR-1b-5p	Piwil2	ENSMUSG00000033644
mmu-miR-1b-5p	Plag1	ENSMUSG00000003282
mmu-miR-1b-5p	Plxna1	ENSMUSG00000030084
mmu-miR-1b-5p	Pofut1	ENSMUSG00000046020
mmu-miR-1b-5p	Prl5a1	ENSMUSG00000017064
mmu-miR-1b-5p	Prmt8	ENSMUSG00000030350
mmu-miR-1b-5p	Prpf18	ENSMUSG00000039449
mmu-miR-1b-5p	Psd3	ENSMUSG00000030465
mmu-miR-1b-5p	Ptdss1	ENSMUSG00000021518
mmu-miR-1b-5p	Rasa2	ENSMUSG00000032413
mmu-miR-1b-5p	Rbbp9	ENSMUSG00000027428
mmu-miR-1b-5p	Rbm41	ENSMUSG00000031433
mmu-miR-1b-5p	Rbm47	ENSMUSG00000070780
mmu-miR-1b-5p	Rgl1	ENSMUSG00000026482
mmu-miR-1b-5p	Rps3	ENSMUSG00000030744
mmu-miR-1b-5p	Rsbn1l	ENSMUSG00000039968
mmu-miR-1b-5p	Rufy2	ENSMUSG00000020070
mmu-miR-1b-5p	Sass6	ENSMUSG00000027959
mmu-miR-1b-5p	Satb2	ENSMUSG00000038331
mmu-miR-1b-5p	Sept3	ENSMUSG00000022456
mmu-miR-1b-5p	Slc16a10	ENSMUSG00000019838
mmu-miR-1b-5p	Slc16a9	ENSMUSG00000037762
mmu-miR-1b-5p	Slc25a46	ENSMUSG00000024259
mmu-miR-1b-5p	Slc41a3	ENSMUSG00000030089
mmu-miR-1b-5p	Snx27	ENSMUSG00000028136
mmu-miR-1b-5p	Srgap3	ENSMUSG00000030257
mmu-miR-1b-5p	Ss18l1	ENSMUSG00000039086
mmu-miR-1b-5p	St6galnac1	ENSMUSG00000009588
mmu-miR-1b-5p	Strbp	ENSMUSG00000026915
mmu-miR-1b-5p	Stxbp6	ENSMUSG00000046314
mmu-miR-1b-5p	Tas1r3	ENSMUSG00000029072
mmu-miR-1b-5p	Tbc1d13	ENSMUSG00000039678
mmu-miR-1b-5p	Tbc1d22b	ENSMUSG00000042203
mmu-miR-1b-5p	Tdrd1	ENSMUSG00000025081
mmu-miR-1b-5p	Tfcp2l1	ENSMUSG00000026380
mmu-miR-1b-5p	Tigd5	ENSMUSG00000103906
mmu-miR-1b-5p	Tlr4	ENSMUSG00000039005
mmu-miR-1b-5p	Tmem161b	ENSMUSG00000035762
mmu-miR-1b-5p	Tmem200a	ENSMUSG00000049420
mmu-miR-1b-5p	Tnrc6b	ENSMUSG00000047888
mmu-miR-1b-5p	Tpte	ENSMUSG00000031481
mmu-miR-1b-5p	Trhr	ENSMUSG00000038760
mmu-miR-1b-5p	Ubac1	ENSMUSG00000036352
mmu-miR-1b-5p	Unc5b	ENSMUSG00000020099
mmu-miR-1b-5p	Uty	ENSMUSG00000068457
mmu-miR-1b-5p	Wfdc12	ENSMUSG00000042845
mmu-miR-1b-5p	Zbtb39	ENSMUSG00000044617
mmu-miR-1b-5p	Zfp354a	ENSMUSG00000020364
mmu-miR-1b-5p	Zfp446	ENSMUSG00000033961
mmu-miR-1b-5p	Zfp462	ENSMUSG00000060206
mmu-miR-1b-5p	Zfp874b	ENSMUSG00000059839
mmu-miR-1b-5p	Zfp941	ENSMUSG00000060314
mmu-miR-1b-5p	Zfp963	ENSMUSG00000092260
mmu-miR-1b-5p	Zscan4c	ENSMUSG00000054272
mmu-miR-1b-5p	Zscan4d	ENSMUSG00000090714
mmu-miR-25-3p	Btg2	ENSMUSG00000020423
mmu-miR-25-3p	Cd69	ENSMUSG00000030156
mmu-miR-25-3p	Chm	ENSMUSG00000025531
mmu-miR-25-3p	Cpeb1	ENSMUSG00000025586
mmu-miR-25-3p	Fam136a	ENSMUSG00000057497
mmu-miR-25-3p	Fbxw7	ENSMUSG00000028086
mmu-miR-25-3p	Gm5148	ENSMUSG00000058174
mmu-miR-25-3p	Il5ra	ENSMUSG00000005364
mmu-miR-25-3p	Ncam2	ENSMUSG00000022762
mmu-miR-25-3p	Rhbdl3	ENSMUSG00000017692
mmu-miR-25-3p	Stk10	ENSMUSG00000020272
mmu-miR-25-3p	Tagap	ENSMUSG00000033450
mmu-miR-25-3p	Tagap1	ENSMUSG00000052031
mmu-miR-25-3p	Uba1y	ENSMUSG00000069053
mmu-miR-25-3p	Wwp2	ENSMUSG00000031930
mmu-miR-25-3p	Xylt2	ENSMUSG00000020868
mmu-miR-25-3p	Zfp300	ENSMUSG00000031079
mmu-miR-25-3p	Zfp970	ENSMUSG00000078866
mmu-miR-25-3p	Zpbp	ENSMUSG00000020193
mmu-miR-451a	Abhd17b	ENSMUSG00000047368
mmu-miR-451a	Acc	ENSMUSG00000020532
mmu-miR-451a	Akt3	ENSMUSG00000019699
mmu-miR-451a	Ankrd17	ENSMUSG00000055204
mmu-miR-451a	Ankrd46	ENSMUSG00000048307
mmu-miR-451a	Arnt2	ENSMUSG00000015709
mmu-miR-451a	Atf2	ENSMUSG00000027104
mmu-miR-451a	Avl9	ENSMUSG00000029787
mmu-miR-451a	AW549877	ENSMUSG00000041935
mmu-miR-451a	Cab39	ENSMUSG00000036707
mmu-miR-451a	Clstn1	ENSMUSG00000039953
mmu-miR-451a	D14Abb1e	ENSMUSG00000040651
mmu-miR-451a	Ddx19b	ENSMUSG00000033658
mmu-miR-451a	Gdap1	ENSMUSG00000025777
mmu-miR-451a	Gm2a	ENSMUSG00000000594
mmu-miR-451a	Gnai3	ENSMUSG00000000001
mmu-miR-451a	Grin3a	ENSMUSG00000039579
mmu-miR-451a	Hey1	ENSMUSG00000040289
mmu-miR-451a	Ik	ENSMUSG00000024474
mmu-miR-451a	Ints10	ENSMUSG00000031864
mmu-miR-451a	Irf8	ENSMUSG00000041515
mmu-miR-451a	Klhl5	ENSMUSG00000054920
mmu-miR-451a	Limch1	ENSMUSG00000037736
mmu-miR-451a	Lonrf2	ENSMUSG00000048814
mmu-miR-451a	Lphn2	ENSMUSG00000028184
mmu-miR-451a	Lsm14a	ENSMUSG00000066568
mmu-miR-451a	Megf9	ENSMUSG00000039270
mmu-miR-451a	MIF	ENSMUSG00000033307
mmu-miR-451a	Myc	ENSMUSG00000022346
mmu-miR-451a	Nsmaf	ENSMUSG00000028245
mmu-miR-451a	Nucks1	ENSMUSG00000026434
mmu-miR-451a	Pom121	ENSMUSG00000053293
mmu-miR-451a	Ppm1l	ENSMUSG00000027784
mmu-miR-451a	Prkaa1	ENSMUSG00000050697
mmu-miR-451a	Rnf103	ENSMUSG00000052656
mmu-miR-451a	Scn8a	ENSMUSG00000023033
mmu-miR-451a	Setd5	ENSMUSG00000034269
mmu-miR-451a	Shank2	ENSMUSG00000037541
mmu-miR-451a	Sidt2	ENSMUSG00000034908
mmu-miR-451a	Snrk	ENSMUSG00000038145
mmu-miR-451a	Sptssa	ENSMUSG00000044408
mmu-miR-451a	Syp	ENSMUSG00000031144
mmu-miR-451a	Tenm2	ENSMUSG00000049336
mmu-miR-451a	Thbd	ENSMUSG00000074743
mmu-miR-451a	Thrsp	ENSMUSG00000035686
mmu-miR-451a	Trim33	ENSMUSG00000033014
mmu-miR-451a	Trpc3	ENSMUSG00000027716
mmu-miR-451a	Vezt	ENSMUSG00000036099
mmu-miR-451a	Xiap	ENSMUSG00000025860
mmu-miR-451a	Ywhaz	ENSMUSG00000022285
mmu-miR-451a	Zfp644	ENSMUSG00000049606

## Sheet: ADNS_vs_ADF.DElist_target
miRNA	genename	ID
mmu-let-7i-5p	Apc2	ENSMUSG00000020135
mmu-let-7i-5p	Armc2	ENSMUSG00000071324
mmu-let-7i-5p	Atp2b2	ENSMUSG00000030302
mmu-let-7i-5p	Col1a2	ENSMUSG00000029661
mmu-let-7i-5p	Cts8	ENSMUSG00000057446
mmu-let-7i-5p	Fbxl14	ENSMUSG00000030019
mmu-let-7i-5p	Gnl3l	ENSMUSG00000025266
mmu-let-7i-5p	Ifnar1	ENSMUSG00000022967
mmu-let-7i-5p	Il6	ENSMUSG00000025746
mmu-let-7i-5p	Lins1	ENSMUSG00000053091
mmu-let-7i-5p	Meis2	ENSMUSG00000027210
mmu-let-7i-5p	Msi2	ENSMUSG00000069769
mmu-let-7i-5p	Mup11	ENSMUSG00000073834
mmu-let-7i-5p	Mup17	ENSMUSG00000096688
mmu-let-7i-5p	Nf2	ENSMUSG00000009073
mmu-let-7i-5p	Nup214	ENSMUSG00000001855
mmu-let-7i-5p	Tnfrsf26	ENSMUSG00000045362
mmu-let-7i-5p	Zfp444	ENSMUSG00000044876
mmu-miR-130b-3p	Acbd5	ENSMUSG00000026781
mmu-miR-130b-3p	Arrdc3	ENSMUSG00000074794
mmu-miR-130b-3p	Chrna7	ENSMUSG00000030525
mmu-miR-130b-3p	Fgfr1op2	ENSMUSG00000040242
mmu-miR-130b-3p	Homez	ENSMUSG00000057156
mmu-miR-130b-3p	Inpp5e	ENSMUSG00000026925
mmu-miR-130b-3p	Irf1	ENSMUSG00000018899
mmu-miR-130b-3p	Kdm2a	ENSMUSG00000054611
mmu-miR-130b-3p	Map3k12	ENSMUSG00000023050
mmu-miR-130b-3p	Meox2	ENSMUSG00000036144
mmu-miR-130b-3p	Mup13	ENSMUSG00000089873
mmu-miR-130b-3p	Mup7	ENSMUSG00000073842
mmu-miR-130b-3p	Nfia	ENSMUSG00000028565
mmu-miR-130b-3p	Rhod	ENSMUSG00000041845
mmu-miR-130b-3p	Snx27	ENSMUSG00000028136
mmu-miR-130b-3p	Tgfb1	ENSMUSG00000002603
mmu-miR-130b-3p	Timp2	ENSMUSG00000017466
mmu-miR-130b-3p	Tmem25	ENSMUSG00000002032
mmu-miR-130b-3p	Ubap2l	ENSMUSG00000042520
mmu-miR-19a-3p	Acadm	ENSMUSG00000062908
mmu-miR-19a-3p	Atp10a	ENSMUSG00000025324
mmu-miR-19a-3p	Atxn1	ENSMUSG00000046876
mmu-miR-19a-3p	Chrna7	ENSMUSG00000030525
mmu-miR-19a-3p	Chrnd	ENSMUSG00000026251
mmu-miR-19a-3p	Fam104a	ENSMUSG00000041629
mmu-miR-19a-3p	Fam83d	ENSMUSG00000027654
mmu-miR-19a-3p	Fgfr1op2	ENSMUSG00000040242
mmu-miR-19a-3p	Fzd4	ENSMUSG00000049791
mmu-miR-19a-3p	Gja3	ENSMUSG00000048582
mmu-miR-19a-3p	Ilf3	ENSMUSG00000032178
mmu-miR-19a-3p	Kdm2a	ENSMUSG00000054611
mmu-miR-19a-3p	Lrp6	ENSMUSG00000030201
mmu-miR-19a-3p	Map3k12	ENSMUSG00000023050
mmu-miR-19a-3p	Nat8f2	ENSMUSG00000033634
mmu-miR-19a-3p	Nat8f4	ENSMUSG00000068299
mmu-miR-19a-3p	Nhsl1	ENSMUSG00000039835
mmu-miR-19a-3p	Pakap	ENSMUSG00000090053
mmu-miR-19a-3p	PTEN	ENSMUSG00000013663
mmu-miR-19a-3p	Pten	ENSMUSG00000013663
mmu-miR-19a-3p	Rnf11	ENSMUSG00000028557
mmu-miR-19a-3p	Slc35f1	ENSMUSG00000038602
mmu-miR-19a-3p	Snap25	ENSMUSG00000027273
mmu-miR-19a-3p	Snx27	ENSMUSG00000028136
mmu-miR-19a-3p	Tet2	ENSMUSG00000040943
mmu-miR-19a-3p	Timp2	ENSMUSG00000017466
mmu-miR-19a-3p	Tmem25	ENSMUSG00000002032
mmu-miR-19a-3p	Tnf	ENSMUSG00000024401
mmu-miR-19a-3p	Ttc39b	ENSMUSG00000038172
mmu-miR-19a-3p	Ubap2l	ENSMUSG00000042520
mmu-miR-19a-3p	Zfpm2	ENSMUSG00000022306
mmu-miR-423-5p	Zmat3	ENSMUSG00000027663
mmu-miR-451a	Abhd17b	ENSMUSG00000047368
mmu-miR-451a	Acc	ENSMUSG00000020532
mmu-miR-451a	Akt3	ENSMUSG00000019699
mmu-miR-451a	Ankrd17	ENSMUSG00000055204
mmu-miR-451a	Ankrd46	ENSMUSG00000048307
mmu-miR-451a	Arnt2	ENSMUSG00000015709
mmu-miR-451a	Atf2	ENSMUSG00000027104
mmu-miR-451a	Avl9	ENSMUSG00000029787
mmu-miR-451a	AW549877	ENSMUSG00000041935
mmu-miR-451a	Cab39	ENSMUSG00000036707
mmu-miR-451a	Clstn1	ENSMUSG00000039953
mmu-miR-451a	D14Abb1e	ENSMUSG00000040651
mmu-miR-451a	Ddx19b	ENSMUSG00000033658
mmu-miR-451a	Gdap1	ENSMUSG00000025777
mmu-miR-451a	Gm2a	ENSMUSG00000000594
mmu-miR-451a	Gnai3	ENSMUSG00000000001
mmu-miR-451a	Grin3a	ENSMUSG00000039579
mmu-miR-451a	Hey1	ENSMUSG00000040289
mmu-miR-451a	Ik	ENSMUSG00000024474
mmu-miR-451a	Ints10	ENSMUSG00000031864
mmu-miR-451a	Irf8	ENSMUSG00000041515
mmu-miR-451a	Klhl5	ENSMUSG00000054920
mmu-miR-451a	Limch1	ENSMUSG00000037736
mmu-miR-451a	Lonrf2	ENSMUSG00000048814
mmu-miR-451a	Lphn2	ENSMUSG00000028184
mmu-miR-451a	Lsm14a	ENSMUSG00000066568
mmu-miR-451a	Megf9	ENSMUSG00000039270
mmu-miR-451a	MIF	ENSMUSG00000033307
mmu-miR-451a	Myc	ENSMUSG00000022346
mmu-miR-451a	Nsmaf	ENSMUSG00000028245
mmu-miR-451a	Nucks1	ENSMUSG00000026434
mmu-miR-451a	Pom121	ENSMUSG00000053293
mmu-miR-451a	Ppm1l	ENSMUSG00000027784
mmu-miR-451a	Prkaa1	ENSMUSG00000050697
mmu-miR-451a	Rnf103	ENSMUSG00000052656
mmu-miR-451a	Scn8a	ENSMUSG00000023033
mmu-miR-451a	Setd5	ENSMUSG00000034269
mmu-miR-451a	Shank2	ENSMUSG00000037541
mmu-miR-451a	Sidt2	ENSMUSG00000034908
mmu-miR-451a	Snrk	ENSMUSG00000038145
mmu-miR-451a	Sptssa	ENSMUSG00000044408
mmu-miR-451a	Syp	ENSMUSG00000031144
mmu-miR-451a	Tenm2	ENSMUSG00000049336
mmu-miR-451a	Thbd	ENSMUSG00000074743
mmu-miR-451a	Thrsp	ENSMUSG00000035686
mmu-miR-451a	Trim33	ENSMUSG00000033014
mmu-miR-451a	Trpc3	ENSMUSG00000027716
mmu-miR-451a	Vezt	ENSMUSG00000036099
mmu-miR-451a	Xiap	ENSMUSG00000025860
mmu-miR-451a	Ywhaz	ENSMUSG00000022285
mmu-miR-451a	Zfp644	ENSMUSG00000049606
mmu-miR-466i-5p	4921509C19Rik	ENSMUSG00000061525
mmu-miR-466i-5p	Abcc9	ENSMUSG00000030249
mmu-miR-466i-5p	Ackr4	ENSMUSG00000079355
mmu-miR-466i-5p	Acot2	ENSMUSG00000021226
mmu-miR-466i-5p	Acsm2	ENSMUSG00000030945
mmu-miR-466i-5p	Acss1	ENSMUSG00000027452
mmu-miR-466i-5p	Adamts14	ENSMUSG00000059901
mmu-miR-466i-5p	Adamts17	ENSMUSG00000058145
mmu-miR-466i-5p	Adarb2	ENSMUSG00000052551
mmu-miR-466i-5p	Adgra1	ENSMUSG00000025475
mmu-miR-466i-5p	Ado	ENSMUSG00000057134
mmu-miR-466i-5p	Adra1b	ENSMUSG00000050541
mmu-miR-466i-5p	Agtrap	ENSMUSG00000029007
mmu-miR-466i-5p	Akap10	ENSMUSG00000047804
mmu-miR-466i-5p	Akap2	ENSMUSG00000090053
mmu-miR-466i-5p	Akap7	ENSMUSG00000039166
mmu-miR-466i-5p	Ank2	ENSMUSG00000032826
mmu-miR-466i-5p	Ap1ar	ENSMUSG00000074238
mmu-miR-466i-5p	Apba1	ENSMUSG00000024897
mmu-miR-466i-5p	Aplnr	ENSMUSG00000044338
mmu-miR-466i-5p	Appl1	ENSMUSG00000040760
mmu-miR-466i-5p	Aptx	ENSMUSG00000028411
mmu-miR-466i-5p	Asah2	ENSMUSG00000024887
mmu-miR-466i-5p	Asap3	ENSMUSG00000036995
mmu-miR-466i-5p	Asb13	ENSMUSG00000033781
mmu-miR-466i-5p	Ascl4	ENSMUSG00000085111
mmu-miR-466i-5p	Asxl2	ENSMUSG00000037486
mmu-miR-466i-5p	Atp2b3	ENSMUSG00000031376
mmu-miR-466i-5p	Atxn1	ENSMUSG00000046876
mmu-miR-466i-5p	B4galt6	ENSMUSG00000056124
mmu-miR-466i-5p	Barhl2	ENSMUSG00000034384
mmu-miR-466i-5p	Baz2b	ENSMUSG00000026987
mmu-miR-466i-5p	Bcl2	ENSMUSG00000057329
mmu-miR-466i-5p	Bcl2l11	ENSMUSG00000027381
mmu-miR-466i-5p	Bend3	ENSMUSG00000038214
mmu-miR-466i-5p	Bnc2	ENSMUSG00000028487
mmu-miR-466i-5p	C5ar2	ENSMUSG00000074361
mmu-miR-466i-5p	Cacna2d2	ENSMUSG00000010066
mmu-miR-466i-5p	Calcoco1	ENSMUSG00000023055
mmu-miR-466i-5p	Calcr	ENSMUSG00000023964
mmu-miR-466i-5p	Camk1d	ENSMUSG00000039145
mmu-miR-466i-5p	Cap2	ENSMUSG00000021373
mmu-miR-466i-5p	Car10	ENSMUSG00000056158
mmu-miR-466i-5p	Casc4	ENSMUSG00000060227
mmu-miR-466i-5p	Cask	ENSMUSG00000031012
mmu-miR-466i-5p	Casp8	ENSMUSG00000026029
mmu-miR-466i-5p	Ccdc85a	ENSMUSG00000032878
mmu-miR-466i-5p	Ccna2	ENSMUSG00000027715
mmu-miR-466i-5p	Ccpg1	ENSMUSG00000034563
mmu-miR-466i-5p	Cd1d1	ENSMUSG00000028076
mmu-miR-466i-5p	Cd274	ENSMUSG00000016496
mmu-miR-466i-5p	Cd28	ENSMUSG00000026012
mmu-miR-466i-5p	Cd2ap	ENSMUSG00000061665
mmu-miR-466i-5p	Cd33	ENSMUSG00000004609
mmu-miR-466i-5p	Cd4	ENSMUSG00000023274
mmu-miR-466i-5p	Cdh12	ENSMUSG00000040452
mmu-miR-466i-5p	Cdh20	ENSMUSG00000050840
mmu-miR-466i-5p	Cdk13	ENSMUSG00000041297
mmu-miR-466i-5p	Cdk7	ENSMUSG00000069089
mmu-miR-466i-5p	Cds2	ENSMUSG00000058793
mmu-miR-466i-5p	Ceacam1	ENSMUSG00000074272
mmu-miR-466i-5p	Ceacam18	ENSMUSG00000030472
mmu-miR-466i-5p	Cer1	ENSMUSG00000038192
mmu-miR-466i-5p	Chrnb4	ENSMUSG00000035200
mmu-miR-466i-5p	Chrnd	ENSMUSG00000026251
mmu-miR-466i-5p	Chst2	ENSMUSG00000033350
mmu-miR-466i-5p	Clec7a	ENSMUSG00000079293
mmu-miR-466i-5p	Clvs1	ENSMUSG00000041216
mmu-miR-466i-5p	Cnih3	ENSMUSG00000026514
mmu-miR-466i-5p	Cnksr2	ENSMUSG00000025658
mmu-miR-466i-5p	Cntn3	ENSMUSG00000030075
mmu-miR-466i-5p	Commd7	ENSMUSG00000056941
mmu-miR-466i-5p	Cox15	ENSMUSG00000040018
mmu-miR-466i-5p	Cradd	ENSMUSG00000045867
mmu-miR-466i-5p	Creg2	ENSMUSG00000050967
mmu-miR-466i-5p	Csf2ra	ENSMUSG00000059326
mmu-miR-466i-5p	Cxcl15	ENSMUSG00000029375
mmu-miR-466i-5p	D430042O09Rik	ENSMUSG00000032743
mmu-miR-466i-5p	D630003M21Rik	ENSMUSG00000037813
mmu-miR-466i-5p	D630045J12Rik	ENSMUSG00000063455
mmu-miR-466i-5p	Ddx6	ENSMUSG00000032097
mmu-miR-466i-5p	Dgkg	ENSMUSG00000022861
mmu-miR-466i-5p	Dhdh	ENSMUSG00000011382
mmu-miR-466i-5p	Dhfr	ENSMUSG00000021707
mmu-miR-466i-5p	Dmd	ENSMUSG00000045103
mmu-miR-466i-5p	Dmrta1	ENSMUSG00000043753
mmu-miR-466i-5p	Dnaaf5	ENSMUSG00000025857
mmu-miR-466i-5p	Dnase1l3	ENSMUSG00000025279
mmu-miR-466i-5p	Dnlz	ENSMUSG00000075467
mmu-miR-466i-5p	Draxin	ENSMUSG00000029005
mmu-miR-466i-5p	Drp2	ENSMUSG00000000223
mmu-miR-466i-5p	Dzank1	ENSMUSG00000037259
mmu-miR-466i-5p	E2f8	ENSMUSG00000046179
mmu-miR-466i-5p	Ebf3	ENSMUSG00000010476
mmu-miR-466i-5p	Ece1	ENSMUSG00000057530
mmu-miR-466i-5p	Efcab14	ENSMUSG00000034210
mmu-miR-466i-5p	Egfl6	ENSMUSG00000000402
mmu-miR-466i-5p	Ehd3	ENSMUSG00000024065
mmu-miR-466i-5p	Ehhadh	ENSMUSG00000022853
mmu-miR-466i-5p	Elfn1	ENSMUSG00000048988
mmu-miR-466i-5p	Elovl6	ENSMUSG00000041220
mmu-miR-466i-5p	Entpd1	ENSMUSG00000048120
mmu-miR-466i-5p	Eogt	ENSMUSG00000035245
mmu-miR-466i-5p	Epas1	ENSMUSG00000024140
mmu-miR-466i-5p	Epha4	ENSMUSG00000026235
mmu-miR-466i-5p	Epha7	ENSMUSG00000028289
mmu-miR-466i-5p	Etv3	ENSMUSG00000003382
mmu-miR-466i-5p	Evi2b	ENSMUSG00000093938
mmu-miR-466i-5p	Fam107a	ENSMUSG00000021750
mmu-miR-466i-5p	Fam169b	ENSMUSG00000074071
mmu-miR-466i-5p	Fam198a	ENSMUSG00000038233
mmu-miR-466i-5p	Fam213a	ENSMUSG00000021792
mmu-miR-466i-5p	Fblim1	ENSMUSG00000006219
mmu-miR-466i-5p	Fbrs	ENSMUSG00000042423
mmu-miR-466i-5p	Fbxl17	ENSMUSG00000023965
mmu-miR-466i-5p	Fech	ENSMUSG00000024588
mmu-miR-466i-5p	Flnb	ENSMUSG00000025278
mmu-miR-466i-5p	Flrt1	ENSMUSG00000047787
mmu-miR-466i-5p	Foxk1	ENSMUSG00000056493
mmu-miR-466i-5p	Frk	ENSMUSG00000019779
mmu-miR-466i-5p	Frmd5	ENSMUSG00000027238
mmu-miR-466i-5p	Fsd1l	ENSMUSG00000054752
mmu-miR-466i-5p	Gabpb2	ENSMUSG00000038766
mmu-miR-466i-5p	Gatc	ENSMUSG00000029536
mmu-miR-466i-5p	Gcnt4	ENSMUSG00000091387
mmu-miR-466i-5p	Gdpgp1	ENSMUSG00000050973
mmu-miR-466i-5p	Gfod1	ENSMUSG00000051335
mmu-miR-466i-5p	Gfpt1	ENSMUSG00000029992
mmu-miR-466i-5p	Gfra2	ENSMUSG00000022103
mmu-miR-466i-5p	Gm14137	ENSMUSG00000055926
mmu-miR-466i-5p	Gm14326	ENSMUSG00000078862
mmu-miR-466i-5p	Gm4841	ENSMUSG00000068606
mmu-miR-466i-5p	Gm5615	ENSMUSG00000074448
mmu-miR-466i-5p	Gna13	ENSMUSG00000020611
mmu-miR-466i-5p	Gnal	ENSMUSG00000024524
mmu-miR-466i-5p	Gnb4	ENSMUSG00000027669
mmu-miR-466i-5p	Gramd1c	ENSMUSG00000036292
mmu-miR-466i-5p	Grasp	ENSMUSG00000000531
mmu-miR-466i-5p	Greb1	ENSMUSG00000036523
mmu-miR-466i-5p	Gria3	ENSMUSG00000001986
mmu-miR-466i-5p	Grid1	ENSMUSG00000041078
mmu-miR-466i-5p	Grik3	ENSMUSG00000001985
mmu-miR-466i-5p	Grk3	ENSMUSG00000042249
mmu-miR-466i-5p	Gtf2h2	ENSMUSG00000021639
mmu-miR-466i-5p	Has2	ENSMUSG00000022367
mmu-miR-466i-5p	Havcr2	ENSMUSG00000020399
mmu-miR-466i-5p	Hif1an	ENSMUSG00000036450
mmu-miR-466i-5p	Hoxc8	ENSMUSG00000001657
mmu-miR-466i-5p	Hpca	ENSMUSG00000028785
mmu-miR-466i-5p	Hspb7	ENSMUSG00000006221
mmu-miR-466i-5p	Htt	ENSMUSG00000029104
mmu-miR-466i-5p	Iars	ENSMUSG00000037851
mmu-miR-466i-5p	Iffo2	ENSMUSG00000041025
mmu-miR-466i-5p	Ifi44	ENSMUSG00000028037
mmu-miR-466i-5p	Igf1r	ENSMUSG00000005533
mmu-miR-466i-5p	Igf2	ENSMUSG00000048583
mmu-miR-466i-5p	Iglon5	ENSMUSG00000013367
mmu-miR-466i-5p	Igsf11	ENSMUSG00000022790
mmu-miR-466i-5p	Il18r1	ENSMUSG00000026070
mmu-miR-466i-5p	Ildr2	ENSMUSG00000040612
mmu-miR-466i-5p	Insig2	ENSMUSG00000003721
mmu-miR-466i-5p	Insr	ENSMUSG00000005534
mmu-miR-466i-5p	Iqgap2	ENSMUSG00000021676
mmu-miR-466i-5p	Itga11	ENSMUSG00000032243
mmu-miR-466i-5p	Itga9	ENSMUSG00000039115
mmu-miR-466i-5p	Jarid2	ENSMUSG00000038518
mmu-miR-466i-5p	Kank2	ENSMUSG00000032194
mmu-miR-466i-5p	Kcnc1	ENSMUSG00000058975
mmu-miR-466i-5p	Kcnip3	ENSMUSG00000079056
mmu-miR-466i-5p	Kcnj1	ENSMUSG00000041248
mmu-miR-466i-5p	Kcnj16	ENSMUSG00000051497
mmu-miR-466i-5p	Kif1a	ENSMUSG00000014602
mmu-miR-466i-5p	Klhl13	ENSMUSG00000036782
mmu-miR-466i-5p	Klhl23	ENSMUSG00000042155
mmu-miR-466i-5p	Kmt5b	ENSMUSG00000045098
mmu-miR-466i-5p	Krt222	ENSMUSG00000035849
mmu-miR-466i-5p	L1cam	ENSMUSG00000031391
mmu-miR-466i-5p	Lbp	ENSMUSG00000016024
mmu-miR-466i-5p	Lcp2	ENSMUSG00000002699
mmu-miR-466i-5p	Lhx6	ENSMUSG00000026890
mmu-miR-466i-5p	Lifr	ENSMUSG00000054263
mmu-miR-466i-5p	Lin7a	ENSMUSG00000019906
mmu-miR-466i-5p	Lnpk	ENSMUSG00000009207
mmu-miR-466i-5p	Lpp	ENSMUSG00000033306
mmu-miR-466i-5p	Lrrc32	ENSMUSG00000090958
mmu-miR-466i-5p	Lrrc61	ENSMUSG00000073096
mmu-miR-466i-5p	Lrrn4cl	ENSMUSG00000071656
mmu-miR-466i-5p	Lrtm2	ENSMUSG00000055003
mmu-miR-466i-5p	Ltf	ENSMUSG00000032496
mmu-miR-466i-5p	Ly6g6c	ENSMUSG00000092586
mmu-miR-466i-5p	Ly96	ENSMUSG00000025779
mmu-miR-466i-5p	Maf	ENSMUSG00000055435
mmu-miR-466i-5p	Mafb	ENSMUSG00000074622
mmu-miR-466i-5p	Magee2	ENSMUSG00000031224
mmu-miR-466i-5p	Man1c1	ENSMUSG00000037306
mmu-miR-466i-5p	Man2a2	ENSMUSG00000038886
mmu-miR-466i-5p	Map3k7	ENSMUSG00000028284
mmu-miR-466i-5p	Mapk11	ENSMUSG00000053137
mmu-miR-466i-5p	Mapkbp1	ENSMUSG00000033902
mmu-miR-466i-5p	Mavs	ENSMUSG00000037523
mmu-miR-466i-5p	Mbnl3	ENSMUSG00000036109
mmu-miR-466i-5p	Mcidas	ENSMUSG00000074651
mmu-miR-466i-5p	Mdm2	ENSMUSG00000020184
mmu-miR-466i-5p	Mfap3l	ENSMUSG00000031647
mmu-miR-466i-5p	Micall1	ENSMUSG00000033039
mmu-miR-466i-5p	Mlec	ENSMUSG00000048578
mmu-miR-466i-5p	Mocs1	ENSMUSG00000064120
mmu-miR-466i-5p	Mon1b	ENSMUSG00000078908
mmu-miR-466i-5p	Mrgpre	ENSMUSG00000048965
mmu-miR-466i-5p	Ms4a5	ENSMUSG00000054523
mmu-miR-466i-5p	Mtmr12	ENSMUSG00000039458
mmu-miR-466i-5p	Muc13	ENSMUSG00000022824
mmu-miR-466i-5p	Mup18	ENSMUSG00000078674
mmu-miR-466i-5p	Mylk4	ENSMUSG00000044951
mmu-miR-466i-5p	Nab1	ENSMUSG00000002881
mmu-miR-466i-5p	Nab2	ENSMUSG00000025402
mmu-miR-466i-5p	Napb	ENSMUSG00000027438
mmu-miR-466i-5p	Nat8f2	ENSMUSG00000033634
mmu-miR-466i-5p	Nat8f4	ENSMUSG00000068299
mmu-miR-466i-5p	Nat8l	ENSMUSG00000048142
mmu-miR-466i-5p	Nbeal1	ENSMUSG00000073664
mmu-miR-466i-5p	Ncam1	ENSMUSG00000039542
mmu-miR-466i-5p	Ncan	ENSMUSG00000002341
mmu-miR-466i-5p	Nedd4l	ENSMUSG00000024589
mmu-miR-466i-5p	Neu1	ENSMUSG00000007038
mmu-miR-466i-5p	Neurod2	ENSMUSG00000038255
mmu-miR-466i-5p	Nfat5	ENSMUSG00000003847
mmu-miR-466i-5p	Nfatc1	ENSMUSG00000033016
mmu-miR-466i-5p	Ngfr	ENSMUSG00000000120
mmu-miR-466i-5p	Nid1	ENSMUSG00000005397
mmu-miR-466i-5p	Nkap	ENSMUSG00000016409
mmu-miR-466i-5p	Nkx2-9	ENSMUSG00000058669
mmu-miR-466i-5p	Nmnat2	ENSMUSG00000042751
mmu-miR-466i-5p	Npr3	ENSMUSG00000022206
mmu-miR-466i-5p	Nqo2	ENSMUSG00000046949
mmu-miR-466i-5p	Nr4a2	ENSMUSG00000026826
mmu-miR-466i-5p	Nrbp2	ENSMUSG00000075590
mmu-miR-466i-5p	Nsun3	ENSMUSG00000050312
mmu-miR-466i-5p	Nwd1	ENSMUSG00000048148
mmu-miR-466i-5p	Nxpe3	ENSMUSG00000075033
mmu-miR-466i-5p	Oacyl	ENSMUSG00000046610
mmu-miR-466i-5p	Onecut2	ENSMUSG00000045991
mmu-miR-466i-5p	Opcml	ENSMUSG00000062257
mmu-miR-466i-5p	Oprm1	ENSMUSG00000000766
mmu-miR-466i-5p	Oxsm	ENSMUSG00000021786
mmu-miR-466i-5p	Oxtr	ENSMUSG00000049112
mmu-miR-466i-5p	P4ha3	ENSMUSG00000051048
mmu-miR-466i-5p	Pacsin2	ENSMUSG00000016664
mmu-miR-466i-5p	Palm2	ENSMUSG00000038729
mmu-miR-466i-5p	Pappa2	ENSMUSG00000073530
mmu-miR-466i-5p	Pcdh10	ENSMUSG00000049100
mmu-miR-466i-5p	Pcdh17	ENSMUSG00000035566
mmu-miR-466i-5p	Pclo	ENSMUSG00000061601
mmu-miR-466i-5p	Pdcd4	ENSMUSG00000024975
mmu-miR-466i-5p	Pdxk	ENSMUSG00000032788
mmu-miR-466i-5p	Pgm5	ENSMUSG00000041731
mmu-miR-466i-5p	Phactr3	ENSMUSG00000027525
mmu-miR-466i-5p	Pik3r5	ENSMUSG00000020901
mmu-miR-466i-5p	Pirt	ENSMUSG00000048070
mmu-miR-466i-5p	Plcb1	ENSMUSG00000051177
mmu-miR-466i-5p	Pld5	ENSMUSG00000055214
mmu-miR-466i-5p	Podn	ENSMUSG00000028600
mmu-miR-466i-5p	Pogk	ENSMUSG00000040596
mmu-miR-466i-5p	Ppp1r16b	ENSMUSG00000037754
mmu-miR-466i-5p	Ppp1r1c	ENSMUSG00000034683
mmu-miR-466i-5p	Prdm12	ENSMUSG00000079466
mmu-miR-466i-5p	Prdm8	ENSMUSG00000035456
mmu-miR-466i-5p	Prelid3a	ENSMUSG00000024530
mmu-miR-466i-5p	Prex2	ENSMUSG00000048960
mmu-miR-466i-5p	Prkcd	ENSMUSG00000021948
mmu-miR-466i-5p	Prkci	ENSMUSG00000037643
mmu-miR-466i-5p	Proser3	ENSMUSG00000036864
mmu-miR-466i-5p	Prrc2b	ENSMUSG00000039262
mmu-miR-466i-5p	Prss42	ENSMUSG00000044664
mmu-miR-466i-5p	Psd2	ENSMUSG00000024347
mmu-miR-466i-5p	Psd3	ENSMUSG00000030465
mmu-miR-466i-5p	Pstpip2	ENSMUSG00000025429
mmu-miR-466i-5p	Ptgdr	ENSMUSG00000071489
mmu-miR-466i-5p	Ptprb	ENSMUSG00000020154
mmu-miR-466i-5p	Ptpre	ENSMUSG00000041836
mmu-miR-466i-5p	Pura	ENSMUSG00000043991
mmu-miR-466i-5p	Rab11fip1	ENSMUSG00000031488
mmu-miR-466i-5p	Rab3c	ENSMUSG00000021700
mmu-miR-466i-5p	Rab6b	ENSMUSG00000032549
mmu-miR-466i-5p	Rab9b	ENSMUSG00000043463
mmu-miR-466i-5p	Rabgap1	ENSMUSG00000035437
mmu-miR-466i-5p	Rara	ENSMUSG00000037992
mmu-miR-466i-5p	Rasa2	ENSMUSG00000032413
mmu-miR-466i-5p	Rasal2	ENSMUSG00000070565
mmu-miR-466i-5p	Rassf2	ENSMUSG00000027339
mmu-miR-466i-5p	Reps2	ENSMUSG00000040855
mmu-miR-466i-5p	Rfx3	ENSMUSG00000040929
mmu-miR-466i-5p	Rgs9bp	ENSMUSG00000056043
mmu-miR-466i-5p	Rhobtb1	ENSMUSG00000019944
mmu-miR-466i-5p	Rhou	ENSMUSG00000039960
mmu-miR-466i-5p	Rnasel	ENSMUSG00000066800
mmu-miR-466i-5p	Rorb	ENSMUSG00000036192
mmu-miR-466i-5p	Rpusd2	ENSMUSG00000027324
mmu-miR-466i-5p	Rsph4a	ENSMUSG00000039552
mmu-miR-466i-5p	Runx1	ENSMUSG00000022952
mmu-miR-466i-5p	Runx1t1	ENSMUSG00000006586
mmu-miR-466i-5p	Runx3	ENSMUSG00000070691
mmu-miR-466i-5p	Saa4	ENSMUSG00000040017
mmu-miR-466i-5p	Samd7	ENSMUSG00000051860
mmu-miR-466i-5p	Scd3	ENSMUSG00000025202
mmu-miR-466i-5p	Scn2a	ENSMUSG00000075318
mmu-miR-466i-5p	Sema5a	ENSMUSG00000022231
mmu-miR-466i-5p	Sema5b	ENSMUSG00000052133
mmu-miR-466i-5p	Sema6a	ENSMUSG00000019647
mmu-miR-466i-5p	Sfrp1	ENSMUSG00000031548
mmu-miR-466i-5p	Sh2d2a	ENSMUSG00000028071
mmu-miR-466i-5p	Shisa6	ENSMUSG00000053930
mmu-miR-466i-5p	Shroom3	ENSMUSG00000029381
mmu-miR-466i-5p	Sike1	ENSMUSG00000027854
mmu-miR-466i-5p	Sim1	ENSMUSG00000019913
mmu-miR-466i-5p	Six4	ENSMUSG00000034460
mmu-miR-466i-5p	Ski	ENSMUSG00000029050
mmu-miR-466i-5p	Slc17a5	ENSMUSG00000049624
mmu-miR-466i-5p	Slc1a2	ENSMUSG00000005089
mmu-miR-466i-5p	Slc22a8	ENSMUSG00000063796
mmu-miR-466i-5p	Slc24a2	ENSMUSG00000037996
mmu-miR-466i-5p	Slc25a12	ENSMUSG00000027010
mmu-miR-466i-5p	Slc25a21	ENSMUSG00000035472
mmu-miR-466i-5p	Slc30a10	ENSMUSG00000026614
mmu-miR-466i-5p	Slc31a2	ENSMUSG00000066152
mmu-miR-466i-5p	Slc39a14	ENSMUSG00000022094
mmu-miR-466i-5p	Slc4a4	ENSMUSG00000060961
mmu-miR-466i-5p	Slc5a8	ENSMUSG00000020062
mmu-miR-466i-5p	Slc6a17	ENSMUSG00000027894
mmu-miR-466i-5p	Slc6a6	ENSMUSG00000030096
mmu-miR-466i-5p	Slc7a1	ENSMUSG00000041313
mmu-miR-466i-5p	Slc8a1	ENSMUSG00000054640
mmu-miR-466i-5p	Slc8a3	ENSMUSG00000079055
mmu-miR-466i-5p	Smarca2	ENSMUSG00000024921
mmu-miR-466i-5p	Smo	ENSMUSG00000001761
mmu-miR-466i-5p	Smpd4	ENSMUSG00000005899
mmu-miR-466i-5p	Snai2	ENSMUSG00000022676
mmu-miR-466i-5p	Snap23	ENSMUSG00000027287
mmu-miR-466i-5p	Snap25	ENSMUSG00000027273
mmu-miR-466i-5p	Snx12	ENSMUSG00000046032
mmu-miR-466i-5p	Sox1	ENSMUSG00000096014
mmu-miR-466i-5p	Sp9	ENSMUSG00000068859
mmu-miR-466i-5p	Srgap3	ENSMUSG00000030257
mmu-miR-466i-5p	Ssr1	ENSMUSG00000021427
mmu-miR-466i-5p	St18	ENSMUSG00000033740
mmu-miR-466i-5p	St8sia1	ENSMUSG00000030283
mmu-miR-466i-5p	Steap2	ENSMUSG00000015653
mmu-miR-466i-5p	Stk10	ENSMUSG00000020272
mmu-miR-466i-5p	Stxbp4	ENSMUSG00000020546
mmu-miR-466i-5p	Stxbp5l	ENSMUSG00000022829
mmu-miR-466i-5p	Supt7l	ENSMUSG00000053134
mmu-miR-466i-5p	Syn3	ENSMUSG00000059602
mmu-miR-466i-5p	Synj2bp	ENSMUSG00000090935
mmu-miR-466i-5p	Syt15	ENSMUSG00000041479
mmu-miR-466i-5p	Tacr1	ENSMUSG00000030043
mmu-miR-466i-5p	Tacr2	ENSMUSG00000020081
mmu-miR-466i-5p	Tbc1d30	ENSMUSG00000052302
mmu-miR-466i-5p	Tbx15	ENSMUSG00000027868
mmu-miR-466i-5p	Tbx22	ENSMUSG00000031241
mmu-miR-466i-5p	Terf2ip	ENSMUSG00000033430
mmu-miR-466i-5p	Tet2	ENSMUSG00000040943
mmu-miR-466i-5p	Tfap2b	ENSMUSG00000025927
mmu-miR-466i-5p	Tgfb2	ENSMUSG00000039239
mmu-miR-466i-5p	Thsd4	ENSMUSG00000032289
mmu-miR-466i-5p	Tiprl	ENSMUSG00000040843
mmu-miR-466i-5p	Tmco1	ENSMUSG00000052428
mmu-miR-466i-5p	Tmem132b	ENSMUSG00000070498
mmu-miR-466i-5p	Tmem151b	ENSMUSG00000096847
mmu-miR-466i-5p	Tmem236	ENSMUSG00000061531
mmu-miR-466i-5p	Tmem245	ENSMUSG00000055296
mmu-miR-466i-5p	Tmem26	ENSMUSG00000060044
mmu-miR-466i-5p	Tmem47	ENSMUSG00000025666
mmu-miR-466i-5p	Tmod2	ENSMUSG00000032186
mmu-miR-466i-5p	Tnfrsf13c	ENSMUSG00000068105
mmu-miR-466i-5p	Tns4	ENSMUSG00000017607
mmu-miR-466i-5p	Trim65	ENSMUSG00000054517
mmu-miR-466i-5p	Trp53i11	ENSMUSG00000068735
mmu-miR-466i-5p	Trpc7	ENSMUSG00000021541
mmu-miR-466i-5p	Trpm3	ENSMUSG00000052387
mmu-miR-466i-5p	Tspan18	ENSMUSG00000027217
mmu-miR-466i-5p	Tyw3	ENSMUSG00000047583
mmu-miR-466i-5p	Ubtf	ENSMUSG00000020923
mmu-miR-466i-5p	Uhrf1bp1l	ENSMUSG00000019951
mmu-miR-466i-5p	Unc13b	ENSMUSG00000028456
mmu-miR-466i-5p	Unc5d	ENSMUSG00000063626
mmu-miR-466i-5p	Unc93a	ENSMUSG00000067049
mmu-miR-466i-5p	Uncx	ENSMUSG00000029546
mmu-miR-466i-5p	Urb2	ENSMUSG00000031976
mmu-miR-466i-5p	Vdr	ENSMUSG00000022479
mmu-miR-466i-5p	Vprbp	ENSMUSG00000040325
mmu-miR-466i-5p	Vps33b	ENSMUSG00000030534
mmu-miR-466i-5p	Vps37a	ENSMUSG00000031600
mmu-miR-466i-5p	Vsnl1	ENSMUSG00000054459
mmu-miR-466i-5p	Wars2	ENSMUSG00000004233
mmu-miR-466i-5p	Wdr46	ENSMUSG00000024312
mmu-miR-466i-5p	Wrn	ENSMUSG00000031583
mmu-miR-466i-5p	Xk	ENSMUSG00000015342
mmu-miR-466i-5p	Xpr1	ENSMUSG00000026469
mmu-miR-466i-5p	Xrcc3	ENSMUSG00000021287
mmu-miR-466i-5p	Zeb2	ENSMUSG00000026872
mmu-miR-466i-5p	Zfand2a	ENSMUSG00000053581
mmu-miR-466i-5p	Zfhx3	ENSMUSG00000038872
mmu-miR-466i-5p	Zfp169	ENSMUSG00000050954
mmu-miR-466i-5p	Zfp248	ENSMUSG00000030145
mmu-miR-466i-5p	Zfp329	ENSMUSG00000057894
mmu-miR-466i-5p	Zfp39	ENSMUSG00000037001
mmu-miR-466i-5p	Zfp449	ENSMUSG00000073176
mmu-miR-466i-5p	Zfp46	ENSMUSG00000051351
mmu-miR-466i-5p	Zfp488	ENSMUSG00000044519
mmu-miR-466i-5p	Zfp607b	ENSMUSG00000057093
mmu-miR-466i-5p	Zfp641	ENSMUSG00000022987
mmu-miR-466i-5p	Zfp68	ENSMUSG00000058291
mmu-miR-466i-5p	Zfp691	ENSMUSG00000045268
mmu-miR-466i-5p	Zfp74	ENSMUSG00000059975
mmu-miR-466i-5p	Zfp92	ENSMUSG00000031374
mmu-miR-466i-5p	Zfp931	ENSMUSG00000078861
mmu-miR-466i-5p	Znrf3	ENSMUSG00000041961
mmu-miR-466i-5p	Zscan29	ENSMUSG00000050619
mmu-miR-574-5p	A830018L16Rik	ENSMUSG00000057715
mmu-miR-574-5p	Asb7	ENSMUSG00000030509
mmu-miR-574-5p	Cdh12	ENSMUSG00000040452
mmu-miR-574-5p	Cpm	ENSMUSG00000020183
mmu-miR-574-5p	Cpne1	ENSMUSG00000074643
mmu-miR-574-5p	Ctsb	ENSMUSG00000021939
mmu-miR-574-5p	Dhdh	ENSMUSG00000011382
mmu-miR-574-5p	Fam213a	ENSMUSG00000021792
mmu-miR-574-5p	Fndc1	ENSMUSG00000071984
mmu-miR-574-5p	Gm5615	ENSMUSG00000074448
mmu-miR-574-5p	Gria3	ENSMUSG00000001986
mmu-miR-574-5p	Iffo2	ENSMUSG00000041025
mmu-miR-574-5p	Ifi44	ENSMUSG00000028037
mmu-miR-574-5p	Maoa	ENSMUSG00000025037
mmu-miR-574-5p	Mrap2	ENSMUSG00000042761
mmu-miR-574-5p	Mylk4	ENSMUSG00000044951
mmu-miR-574-5p	Piezo2	ENSMUSG00000041482
mmu-miR-574-5p	Ppp1cb	ENSMUSG00000014956
mmu-miR-574-5p	Rnasel	ENSMUSG00000066800
mmu-miR-574-5p	S1pr3	ENSMUSG00000067586
mmu-miR-574-5p	Sox1	ENSMUSG00000096014
mmu-miR-574-5p	Stxbp4	ENSMUSG00000020546
mmu-miR-574-5p	T2	ENSMUSG00000058159
mmu-miR-574-5p	Tbc1d5	ENSMUSG00000023923
mmu-miR-574-5p	Trim65	ENSMUSG00000054517
mmu-miR-574-5p	Tyw3	ENSMUSG00000047583
mmu-miR-574-5p	Ubac1	ENSMUSG00000036352
mmu-miR-574-5p	Zdhhc3	ENSMUSG00000025786
mmu-miR-574-5p	Zfp74	ENSMUSG00000059975
mmu-miR-574-5p	Zfp994	ENSMUSG00000096433
