# Supplementary material for: Exosomal MicroRNAs modulate the cognitive function in fasudil treated APPswe/PSEN1dE9 transgenic (APP/PS1) mice model of Alzheimer's disease
Source: Research Square preprint supplement (doi:10.21203/rs.3.rs-1895492/v1), 2022-08-08
Supplement: Supplementary file 3 [file 9751c3120050dcc913ee69f6.xlsx]

## Sheet: Sheet1
SRNA
Types	ADF_A	ADF_A(percent)	ADF_B	ADF_B(percent)	ADNS_A	ADNS_A(percent)	ADNS_B	ADNS_B(percent)	WT_A	WT_A(percent)	WT_B	WT_B(percent)
total	2734952	1	3008437	1	2817263	1	2606403	1	3309916	1	2630666	1
known_miRNA	5631	0.0021	6721	0.0022	7077	0.0025	5565	0.0021	5235	0.0016	5358	0.002
rRNA	1643733	0.601	2019593	0.6713	2058486	0.7307	1937039	0.7432	989965	0.2991	1187153	0.4513
tRNA	10510	0.0038	11156	0.0037	10988	0.0039	10809	0.0041	10796	0.0033	16149	0.0061
snRNA	78310	0.0286	66380	0.0221	92660	0.0329	68786	0.0264	228357	0.069	120080	0.0456
snoRNA	12926	0.0047	7089	0.0024	8572	0.003	7824	0.003	30872	0.0093	17806	0.0068
repeat	513503	0.1878	389576	0.1295	270555	0.096	246434	0.0945	1486776	0.4492	794220	0.3019
novel_miRNA	955	0.0003	432	0.0001	688	0.0002	396	0.0002	701	0.0002	885	0.0003
exon	66573	0.0243	45438	0.0151	44744	0.0159	32146	0.0123	147210	0.0445	114127	0.0434
intron	49955	0.0183	39118	0.013	29890	0.0106	30317	0.0116	121697	0.0368	88806	0.0338
other	352856	0.129	422934	0.1406	293603	0.1042	267087	0.1025	288307	0.0871	286082	0.1087
