# Supplementary material for: Exosomal MicroRNAs modulate the cognitive function in fasudil treated APPswe/PSEN1dE9 transgenic (APP/PS1) mice model of Alzheimer's disease
Source: Research Square preprint supplement (doi:10.21203/rs.3.rs-1895492/v1), 2022-08-08
Supplement: Supplementary file 4 [file 9c44c8fee2cbd37d9b0c8239.xlsx]

## Sheet: WT_vs_ADNS.DEG.KEGG_enrichment
Pathway Hierarchy1	Pathway Hierarchy2	KEGG Pathway	Pathway ID	Gene Number	Background number	P-Value	Q-Value	Gene IDs
Cellular Processes	Cellular community - eukaryotes	Signaling pathways regulating pluripotency of stem cells	ko04550	17	191	1.44457e-10	2.61467e-08	ENSMUSG00000020135:mmu-let-7i-5p,ENSMUSG00000037225:mmu-miR-16-5p,ENSMUSG00000041075:mmu-miR-1a-3p,ENSMUSG00000041075:mmu-miR-126a-3p,ENSMUSG00000020053:mmu-miR-1a-3p,ENSMUSG00000031834:mmu-miR-126a-3p,ENSMUSG00000024563:mmu-miR-140-3p,ENSMUSG00000049791:mmu-miR-19a-3p,ENSMUSG00000027852:mmu-miR-1b-5p,ENSMUSG00000019699:mmu-miR-451a,ENSMUSG00000054263:mmu-miR-144-3p,ENSMUSG00000009900:mmu-miR-16-…
Organismal Systems	Aging	Longevity regulating pathway - mammal	ko04211	12	120	2.07125e-08	1.77568e-06	ENSMUSG00000027852:mmu-miR-1b-5p,ENSMUSG00000028945:mmu-miR-1a-3p,ENSMUSG00000005533:mmu-miR-1a-3p,ENSMUSG00000005580:mmu-miR-142a-3p,ENSMUSG00000027665:mmu-miR-1b-5p,ENSMUSG00000055980:mmu-miR-126a-3p,ENSMUSG00000050697:mmu-miR-144-3p,ENSMUSG00000050697:mmu-miR-451a,ENSMUSG00000031834:mmu-miR-126a-3p,ENSMUSG00000020053:mmu-miR-1a-3p,ENSMUSG00000027104:mmu-miR-1b-5p,ENSMUSG00000027104:mmu-miR-451…
Organismal Systems	Immune system	Toll-like receptor signaling pathway	ko04620	12	127	3.92416e-08	1.77568e-06	ENSMUSG00000031834:mmu-miR-126a-3p,ENSMUSG00000026029:mmu-miR-1b-5p,ENSMUSG00000025746:mmu-let-7i-5p,ENSMUSG00000025746:mmu-miR-142a-3p,ENSMUSG00000031392:mmu-miR-142a-3p,ENSMUSG00000022967:mmu-let-7i-5p,ENSMUSG00000019699:mmu-miR-451a,ENSMUSG00000027665:mmu-miR-1b-5p,ENSMUSG00000017652:mmu-miR-16-5p,ENSMUSG00000039005:mmu-miR-1b-5p,ENSMUSG00000052684:mmu-miR-16-5p,ENSMUSG00000027164:mmu-miR-144-…
Organismal Systems	Nervous system	Neurotrophin signaling pathway	ko04722	14	181	3.74714e-08	1.77568e-06	ENSMUSG00000001175:mmu-miR-1a-3p,ENSMUSG00000052684:mmu-miR-16-5p,ENSMUSG00000027852:mmu-miR-1b-5p,ENSMUSG00000057329:mmu-miR-16-5p,ENSMUSG00000006699:mmu-miR-1a-3p,ENSMUSG00000027665:mmu-miR-1b-5p,ENSMUSG00000055980:mmu-miR-126a-3p,ENSMUSG00000027164:mmu-miR-144-3p,ENSMUSG00000035109:mmu-miR-142a-3p,ENSMUSG00000031834:mmu-miR-126a-3p,ENSMUSG00000019699:mmu-miR-451a,ENSMUSG00000048482:mmu-miR-1a-…
Environmental Information Processing	Signal transduction	AMPK signaling pathway	ko04152	13	178	2.25417e-07	7.61242e-06	ENSMUSG00000055980:mmu-miR-126a-3p,ENSMUSG00000027665:mmu-miR-1b-5p,ENSMUSG00000028945:mmu-miR-1a-3p,ENSMUSG00000005533:mmu-miR-1a-3p,ENSMUSG00000050697:mmu-miR-144-3p,ENSMUSG00000050697:mmu-miR-451a,ENSMUSG00000027715:mmu-miR-1b-5p,ENSMUSG00000036707:mmu-miR-144-3p,ENSMUSG00000036707:mmu-miR-451a,ENSMUSG00000031834:mmu-miR-126a-3p,ENSMUSG00000020053:mmu-miR-1a-3p,ENSMUSG00000053007:mmu-miR-16-5p…
Environmental Information Processing	Signal transduction	Jak-STAT signaling pathway	ko04630	14	216	3.34873e-07	7.61242e-06	ENSMUSG00000005364:mmu-miR-25-3p,ENSMUSG00000021756:mmu-miR-142a-3p,ENSMUSG00000005268:mmu-miR-1903,ENSMUSG00000017064:mmu-miR-1b-5p,ENSMUSG00000027665:mmu-miR-1b-5p,ENSMUSG00000057329:mmu-miR-16-5p,ENSMUSG00000022967:mmu-let-7i-5p,ENSMUSG00000070348:mmu-miR-16-5p,ENSMUSG00000019699:mmu-miR-451a,ENSMUSG00000054263:mmu-miR-144-3p,ENSMUSG00000023206:mmu-miR-1b-5p,ENSMUSG00000031834:mmu-miR-126a-3p,…
Environmental Information Processing	Signal transduction	mTOR signaling pathway	ko04150	18	359	3.36461e-07	7.61242e-06	ENSMUSG00000028495:mmu-miR-1a-3p,ENSMUSG00000005533:mmu-miR-1a-3p,ENSMUSG00000028945:mmu-miR-1a-3p,ENSMUSG00000055980:mmu-miR-126a-3p,ENSMUSG00000027665:mmu-miR-1b-5p,ENSMUSG00000050697:mmu-miR-144-3p,ENSMUSG00000050697:mmu-miR-451a,ENSMUSG00000030201:mmu-miR-19a-3p,ENSMUSG00000013663:mmu-miR-19a-3p,ENSMUSG00000013663:mmu-miR-19a-3p,ENSMUSG00000013663:mmu-miR-144-3p,ENSMUSG00000009900:mmu-miR-16-…
Organismal Systems	Development	Axon guidance	ko04360	15	248	3.10239e-07	7.61242e-06	ENSMUSG00000027665:mmu-miR-1b-5p,ENSMUSG00000006699:mmu-miR-1a-3p,ENSMUSG00000020099:mmu-miR-1b-5p,ENSMUSG00000027852:mmu-miR-1b-5p,ENSMUSG00000030084:mmu-miR-1b-5p,ENSMUSG00000059921:mmu-miR-144-3p,ENSMUSG00000005958:mmu-miR-1b-5p,ENSMUSG00000000001:mmu-miR-451a,ENSMUSG00000027716:mmu-miR-451a,ENSMUSG00000031834:mmu-miR-126a-3p,ENSMUSG00000021549:mmu-miR-1a-3p,ENSMUSG00000030257:mmu-miR-1b-5p,EN…
Environmental Information Processing	Signal transduction	PI3K-Akt signaling pathway	ko04151	29	908	1.45566e-06	2.92749e-05	ENSMUSG00000050697:mmu-miR-144-3p,ENSMUSG00000050697:mmu-miR-451a,ENSMUSG00000057329:mmu-miR-16-5p,ENSMUSG00000028945:mmu-miR-1a-3p,ENSMUSG00000028495:mmu-miR-1a-3p,ENSMUSG00000005533:mmu-miR-1a-3p,ENSMUSG00000027665:mmu-miR-1b-5p,ENSMUSG00000055980:mmu-miR-126a-3p,ENSMUSG00000005268:mmu-miR-1903,ENSMUSG00000022285:mmu-miR-451a,ENSMUSG00000029661:mmu-let-7i-5p,ENSMUSG00000022346:mmu-miR-451a,ENSM…
Organismal Systems	Endocrine system	Estrogen signaling pathway	ko04915	13	212	1.64489e-06	2.97725e-05	ENSMUSG00000000001:mmu-miR-451a,ENSMUSG00000027665:mmu-miR-1b-5p,ENSMUSG00000005580:mmu-miR-142a-3p,ENSMUSG00000027852:mmu-miR-1b-5p,ENSMUSG00000052684:mmu-miR-16-5p,ENSMUSG00000001175:mmu-miR-1a-3p,ENSMUSG00000036438:mmu-miR-1a-3p,ENSMUSG00000053007:mmu-miR-16-5p,ENSMUSG00000090877:mmu-miR-1a-3p,ENSMUSG00000019699:mmu-miR-451a,ENSMUSG00000031834:mmu-miR-126a-3p,ENSMUSG00000035109:mmu-miR-142a-3p…
Organismal Systems	Aging	Longevity regulating pathway - multiple species	ko04213	10	123	2.16152e-06	3.55668e-05	ENSMUSG00000050697:mmu-miR-144-3p,ENSMUSG00000050697:mmu-miR-451a,ENSMUSG00000005533:mmu-miR-1a-3p,ENSMUSG00000027852:mmu-miR-1b-5p,ENSMUSG00000005580:mmu-miR-142a-3p,ENSMUSG00000027665:mmu-miR-1b-5p,ENSMUSG00000055980:mmu-miR-126a-3p,ENSMUSG00000020053:mmu-miR-1a-3p,ENSMUSG00000031834:mmu-miR-126a-3p,ENSMUSG00000019699:mmu-miR-451a,ENSMUSG00000090877:mmu-miR-1a-3p
Environmental Information Processing	Signal transduction	FoxO signaling pathway	ko04068	12	197	4.43227e-06	6.68534e-05	ENSMUSG00000050697:mmu-miR-144-3p,ENSMUSG00000050697:mmu-miR-451a,ENSMUSG00000027852:mmu-miR-1b-5p,ENSMUSG00000005533:mmu-miR-1a-3p,ENSMUSG00000027665:mmu-miR-1b-5p,ENSMUSG00000055980:mmu-miR-126a-3p,ENSMUSG00000024563:mmu-miR-140-3p,ENSMUSG00000025746:mmu-let-7i-5p,ENSMUSG00000025746:mmu-miR-142a-3p,ENSMUSG00000013663:mmu-miR-19a-3p,ENSMUSG00000013663:mmu-miR-19a-3p,ENSMUSG00000013663:mmu-miR-14…
Environmental Information Processing	Signal transduction	MAPK signaling pathway	ko04010	16	364	8.16397e-06	9.85119e-05	ENSMUSG00000023050:mmu-miR-19a-3p,ENSMUSG00000024401:mmu-miR-19a-3p,ENSMUSG00000006699:mmu-miR-1a-3p,ENSMUSG00000027852:mmu-miR-1b-5p,ENSMUSG00000048482:mmu-miR-1a-3p,ENSMUSG00000015605:mmu-miR-1a-3p,ENSMUSG00000032413:mmu-miR-1b-5p,ENSMUSG00000027104:mmu-miR-1b-5p,ENSMUSG00000027104:mmu-miR-451a,ENSMUSG00000037225:mmu-miR-16-5p,ENSMUSG00000027164:mmu-miR-144-3p,ENSMUSG00000052684:mmu-miR-16-5p,E…
Environmental Information Processing	Signal transduction	Ras signaling pathway	ko04014	16	363	7.88822e-06	9.85119e-05	ENSMUSG00000001175:mmu-miR-1a-3p,ENSMUSG00000005533:mmu-miR-1a-3p,ENSMUSG00000027665:mmu-miR-1b-5p,ENSMUSG00000019699:mmu-miR-451a,ENSMUSG00000023951:mmu-miR-16-5p,ENSMUSG00000023951:mmu-miR-126a-3p,ENSMUSG00000036438:mmu-miR-1a-3p,ENSMUSG00000035109:mmu-miR-142a-3p,ENSMUSG00000021549:mmu-miR-1a-3p,ENSMUSG00000027852:mmu-miR-1b-5p,ENSMUSG00000006699:mmu-miR-1a-3p,ENSMUSG00000026482:mmu-miR-1b-5p,…
Environmental Information Processing	Signal transduction	TNF signaling pathway	ko04668	10	142	7.8552e-06	9.85119e-05	ENSMUSG00000027104:mmu-miR-1b-5p,ENSMUSG00000027104:mmu-miR-451a,ENSMUSG00000025746:mmu-let-7i-5p,ENSMUSG00000025746:mmu-miR-142a-3p,ENSMUSG00000026029:mmu-miR-1b-5p,ENSMUSG00000031834:mmu-miR-126a-3p,ENSMUSG00000019699:mmu-miR-451a,ENSMUSG00000053007:mmu-miR-16-5p,ENSMUSG00000052684:mmu-miR-16-5p,ENSMUSG00000027665:mmu-miR-1b-5p,ENSMUSG00000024401:mmu-miR-19a-3p,ENSMUSG00000027276:mmu-miR-16-5p
Cellular Processes	Transport and catabolism	Autophagy - animal	ko04140	14	346	7.33031e-05	0.000789846	ENSMUSG00000066551:mmu-miR-142a-3p,ENSMUSG00000019699:mmu-miR-451a,ENSMUSG00000021109:mmu-miR-144-3p,ENSMUSG00000057446:mmu-let-7i-5p,ENSMUSG00000031834:mmu-miR-126a-3p,ENSMUSG00000013663:mmu-miR-19a-3p,ENSMUSG00000013663:mmu-miR-19a-3p,ENSMUSG00000013663:mmu-miR-144-3p,ENSMUSG00000027164:mmu-miR-144-3p,ENSMUSG00000027665:mmu-miR-1b-5p,ENSMUSG00000055980:mmu-miR-126a-3p,ENSMUSG00000027852:mmu-miR…
Organismal Systems	Endocrine system	Prolactin signaling pathway	ko04917	8	116	7.41845e-05	0.000789846	ENSMUSG00000019699:mmu-miR-451a,ENSMUSG00000070348:mmu-miR-16-5p,ENSMUSG00000035109:mmu-miR-142a-3p,ENSMUSG00000031834:mmu-miR-126a-3p,ENSMUSG00000017064:mmu-miR-1b-5p,ENSMUSG00000005268:mmu-miR-1903,ENSMUSG00000027852:mmu-miR-1b-5p,ENSMUSG00000027665:mmu-miR-1b-5p
Environmental Information Processing	Signal transduction	cGMP - PKG signaling pathway	ko04022	12	268	9.28105e-05	0.000933261	ENSMUSG00000055980:mmu-miR-126a-3p,ENSMUSG00000005580:mmu-miR-142a-3p,ENSMUSG00000001175:mmu-miR-1a-3p,ENSMUSG00000000001:mmu-miR-451a,ENSMUSG00000030557:mmu-miR-1a-3p,ENSMUSG00000027104:mmu-miR-1b-5p,ENSMUSG00000027104:mmu-miR-451a,ENSMUSG00000015605:mmu-miR-1a-3p,ENSMUSG00000030302:mmu-let-7i-5p,ENSMUSG00000036438:mmu-miR-1a-3p,ENSMUSG00000053007:mmu-miR-16-5p,ENSMUSG00000021944:mmu-miR-1a-3p,E…
Environmental Information Processing	Signaling molecules and interaction	Cytokine-cytokine receptor interaction	ko04060	13	318	0.000119249	0.00107921	ENSMUSG00000052155:mmu-miR-1b-5p,ENSMUSG00000005364:mmu-miR-25-3p,ENSMUSG00000005268:mmu-miR-1903,ENSMUSG00000021756:mmu-miR-142a-3p,ENSMUSG00000017064:mmu-miR-1b-5p,ENSMUSG00000024401:mmu-miR-19a-3p,ENSMUSG00000017652:mmu-miR-16-5p,ENSMUSG00000023951:mmu-miR-16-5p,ENSMUSG00000023951:mmu-miR-126a-3p,ENSMUSG00000022967:mmu-let-7i-5p,ENSMUSG00000050395:mmu-miR-1903,ENSMUSG00000054263:mmu-miR-144-3p…
Organismal Systems	Nervous system	Cholinergic synapse	ko04725	9	158	0.000117072	0.00107921	ENSMUSG00000053007:mmu-miR-16-5p,ENSMUSG00000030525:mmu-miR-19a-3p,ENSMUSG00000019699:mmu-miR-451a,ENSMUSG00000031834:mmu-miR-126a-3p,ENSMUSG00000000001:mmu-miR-451a,ENSMUSG00000057329:mmu-miR-16-5p,ENSMUSG00000027852:mmu-miR-1b-5p,ENSMUSG00000027665:mmu-miR-1b-5p,ENSMUSG00000005580:mmu-miR-142a-3p
Environmental Information Processing	Signal transduction	Apelin signaling pathway	ko04371	13	320	0.00012689	0.00109367	ENSMUSG00000027852:mmu-miR-1b-5p,ENSMUSG00000028495:mmu-miR-1a-3p,ENSMUSG00000005580:mmu-miR-142a-3p,ENSMUSG00000001175:mmu-miR-1a-3p,ENSMUSG00000050697:mmu-miR-144-3p,ENSMUSG00000050697:mmu-miR-451a,ENSMUSG00000026313:mmu-miR-1a-3p,ENSMUSG00000024563:mmu-miR-140-3p,ENSMUSG00000000001:mmu-miR-451a,ENSMUSG00000027276:mmu-miR-16-5p,ENSMUSG00000030557:mmu-miR-1a-3p,ENSMUSG00000036438:mmu-miR-1a-3p,E…
Environmental Information Processing	Signal transduction	cAMP signaling pathway	ko04024	12	279	0.000135409	0.00111405	ENSMUSG00000027665:mmu-miR-1b-5p,ENSMUSG00000005580:mmu-miR-142a-3p,ENSMUSG00000001175:mmu-miR-1a-3p,ENSMUSG00000052684:mmu-miR-16-5p,ENSMUSG00000000001:mmu-miR-451a,ENSMUSG00000039579:mmu-miR-451a,ENSMUSG00000031834:mmu-miR-126a-3p,ENSMUSG00000053007:mmu-miR-16-5p,ENSMUSG00000036438:mmu-miR-1a-3p,ENSMUSG00000030302:mmu-let-7i-5p,ENSMUSG00000019699:mmu-miR-451a,ENSMUSG00000048482:mmu-miR-1a-3p
Environmental Information Processing	Signal transduction	Sphingolipid signaling pathway	ko04071	9	177	0.000274554	0.00198777	ENSMUSG00000019699:mmu-miR-451a,ENSMUSG00000031834:mmu-miR-126a-3p,ENSMUSG00000013663:mmu-miR-19a-3p,ENSMUSG00000013663:mmu-miR-19a-3p,ENSMUSG00000013663:mmu-miR-144-3p,ENSMUSG00000000001:mmu-miR-451a,ENSMUSG00000028245:mmu-miR-451a,ENSMUSG00000024401:mmu-miR-19a-3p,ENSMUSG00000027665:mmu-miR-1b-5p,ENSMUSG00000027852:mmu-miR-1b-5p,ENSMUSG00000057329:mmu-miR-16-5p
Organismal Systems	Endocrine system	Melanogenesis	ko04916	8	139	0.000260144	0.00198777	ENSMUSG00000041075:mmu-miR-1a-3p,ENSMUSG00000041075:mmu-miR-126a-3p,ENSMUSG00000036438:mmu-miR-1a-3p,ENSMUSG00000009900:mmu-miR-16-5p,ENSMUSG00000005580:mmu-miR-142a-3p,ENSMUSG00000027852:mmu-miR-1b-5p,ENSMUSG00000001175:mmu-miR-1a-3p,ENSMUSG00000049791:mmu-miR-19a-3p,ENSMUSG00000000001:mmu-miR-451a
Organismal Systems	Endocrine system	Regulation of lipolysis in adipocyte	ko04923	6	75	0.000266496	0.00198777	ENSMUSG00000019699:mmu-miR-451a,ENSMUSG00000000001:mmu-miR-451a,ENSMUSG00000005580:mmu-miR-142a-3p,ENSMUSG00000027665:mmu-miR-1b-5p,ENSMUSG00000055980:mmu-miR-126a-3p,ENSMUSG00000031834:mmu-miR-126a-3p
Organismal Systems	Circulatory system	Adrenergic signaling in cardiomyocytes	ko04261	10	221	0.000325092	0.00226314	ENSMUSG00000027104:mmu-miR-1b-5p,ENSMUSG00000027104:mmu-miR-451a,ENSMUSG00000019699:mmu-miR-451a,ENSMUSG00000053007:mmu-miR-16-5p,ENSMUSG00000036438:mmu-miR-1a-3p,ENSMUSG00000030302:mmu-let-7i-5p,ENSMUSG00000001175:mmu-miR-1a-3p,ENSMUSG00000040752:mmu-miR-1a-3p,ENSMUSG00000057329:mmu-miR-16-5p,ENSMUSG00000005580:mmu-miR-142a-3p,ENSMUSG00000000001:mmu-miR-451a
Organismal Systems	Endocrine system	Progesterone-mediated oocyte maturation	ko04914	9	194	0.000536367	0.00359565	ENSMUSG00000025586:mmu-miR-1a-3p,ENSMUSG00000025586:mmu-miR-25-3p,ENSMUSG00000019699:mmu-miR-451a,ENSMUSG00000031834:mmu-miR-126a-3p,ENSMUSG00000020053:mmu-miR-1a-3p,ENSMUSG00000000001:mmu-miR-451a,ENSMUSG00000027715:mmu-miR-1b-5p,ENSMUSG00000005580:mmu-miR-142a-3p,ENSMUSG00000027665:mmu-miR-1b-5p,ENSMUSG00000005533:mmu-miR-1a-3p
Environmental Information Processing	Signal transduction	VEGF signaling pathway	ko04370	6	88	0.000630952	0.00407865	ENSMUSG00000031834:mmu-miR-126a-3p,ENSMUSG00000027852:mmu-miR-1b-5p,ENSMUSG00000027665:mmu-miR-1b-5p,ENSMUSG00000006699:mmu-miR-1a-3p,ENSMUSG00000019699:mmu-miR-451a,ENSMUSG00000023951:mmu-miR-16-5p,ENSMUSG00000023951:mmu-miR-126a-3p
Environmental Information Processing	Signal transduction	ErbB signaling pathway	ko04012	7	132	0.00101895	0.00576341	ENSMUSG00000027852:mmu-miR-1b-5p,ENSMUSG00000031834:mmu-miR-126a-3p,ENSMUSG00000027665:mmu-miR-1b-5p,ENSMUSG00000022346:mmu-miR-451a,ENSMUSG00000052684:mmu-miR-16-5p,ENSMUSG00000035109:mmu-miR-142a-3p,ENSMUSG00000019699:mmu-miR-451a
Environmental Information Processing	Signal transduction	Phosphatidylinositol signaling system	ko04070	7	131	0.0009746	0.00576341	ENSMUSG00000058793:mmu-miR-1b-5p,ENSMUSG00000036438:mmu-miR-1a-3p,ENSMUSG00000022861:mmu-miR-1903,ENSMUSG00000001175:mmu-miR-1a-3p,ENSMUSG00000013663:mmu-miR-19a-3p,ENSMUSG00000013663:mmu-miR-19a-3p,ENSMUSG00000013663:mmu-miR-144-3p,ENSMUSG00000031834:mmu-miR-126a-3p,ENSMUSG00000027665:mmu-miR-1b-5p
Organismal Systems	Development	Osteoclast differentiation	ko04380	8	170	0.000987893	0.00576341	ENSMUSG00000031834:mmu-miR-126a-3p,ENSMUSG00000002111:mmu-miR-126a-3p,ENSMUSG00000022967:mmu-let-7i-5p,ENSMUSG00000019699:mmu-miR-451a,ENSMUSG00000027665:mmu-miR-1b-5p,ENSMUSG00000052684:mmu-miR-16-5p,ENSMUSG00000024401:mmu-miR-19a-3p,ENSMUSG00000027164:mmu-miR-144-3p
Organismal Systems	Endocrine system	Insulin signaling pathway	ko04910	12	346	0.000934089	0.00576341	ENSMUSG00000027852:mmu-miR-1b-5p,ENSMUSG00000028495:mmu-miR-1a-3p,ENSMUSG00000028945:mmu-miR-1a-3p,ENSMUSG00000055980:mmu-miR-126a-3p,ENSMUSG00000027665:mmu-miR-1b-5p,ENSMUSG00000050697:mmu-miR-144-3p,ENSMUSG00000050697:mmu-miR-451a,ENSMUSG00000001175:mmu-miR-1a-3p,ENSMUSG00000036438:mmu-miR-1a-3p,ENSMUSG00000020532:mmu-miR-451a,ENSMUSG00000019699:mmu-miR-451a,ENSMUSG00000031834:mmu-miR-126a-3p,E…
Environmental Information Processing	Signal transduction	MAPK signaling pathway - fly	ko04013	7	148	0.00196948	0.0108023	ENSMUSG00000021549:mmu-miR-1a-3p,ENSMUSG00000032035:mmu-miR-1a-3p,ENSMUSG00000027104:mmu-miR-1b-5p,ENSMUSG00000027104:mmu-miR-451a,ENSMUSG00000030557:mmu-miR-1a-3p,ENSMUSG00000052684:mmu-miR-16-5p,ENSMUSG00000022285:mmu-miR-451a,ENSMUSG00000027164:mmu-miR-144-3p
Organismal Systems	Immune system	NOD-like receptor signaling pathway	ko04621	10	284	0.00218719	0.0116436	ENSMUSG00000025746:mmu-let-7i-5p,ENSMUSG00000025746:mmu-miR-142a-3p,ENSMUSG00000026029:mmu-miR-1b-5p,ENSMUSG00000022967:mmu-let-7i-5p,ENSMUSG00000052684:mmu-miR-16-5p,ENSMUSG00000025860:mmu-miR-451a,ENSMUSG00000039005:mmu-miR-1b-5p,ENSMUSG00000057329:mmu-miR-16-5p,ENSMUSG00000037523:mmu-miR-1b-5p,ENSMUSG00000027164:mmu-miR-144-3p,ENSMUSG00000024401:mmu-miR-19a-3p
Organismal Systems	Aging	Longevity regulating pathway - worm	ko04212	7	166	0.00373598	0.0193204	ENSMUSG00000021109:mmu-miR-144-3p,ENSMUSG00000055980:mmu-miR-126a-3p,ENSMUSG00000027665:mmu-miR-1b-5p,ENSMUSG00000013663:mmu-miR-19a-3p,ENSMUSG00000013663:mmu-miR-19a-3p,ENSMUSG00000013663:mmu-miR-144-3p,ENSMUSG00000025980:mmu-miR-1a-3p,ENSMUSG00000022285:mmu-miR-451a,ENSMUSG00000019699:mmu-miR-451a
Cellular Processes	Cellular community - eukaryotes	Focal adhesion	ko04510	17	691	0.00385427	0.0193784	ENSMUSG00000013663:mmu-miR-19a-3p,ENSMUSG00000013663:mmu-miR-19a-3p,ENSMUSG00000013663:mmu-miR-144-3p,ENSMUSG00000035109:mmu-miR-142a-3p,ENSMUSG00000027087:mmu-miR-16-5p,ENSMUSG00000023951:mmu-miR-16-5p,ENSMUSG00000023951:mmu-miR-126a-3p,ENSMUSG00000019699:mmu-miR-451a,ENSMUSG00000027665:mmu-miR-1b-5p,ENSMUSG00000005533:mmu-miR-1a-3p,ENSMUSG00000057329:mmu-miR-16-5p,ENSMUSG00000052684:mmu-miR-16-…
Environmental Information Processing	Signal transduction	Wnt signaling pathway	ko04310	8	214	0.00413886	0.019714	ENSMUSG00000022346:mmu-miR-451a,ENSMUSG00000041075:mmu-miR-1a-3p,ENSMUSG00000041075:mmu-miR-126a-3p,ENSMUSG00000070348:mmu-miR-16-5p,ENSMUSG00000020135:mmu-let-7i-5p,ENSMUSG00000009900:mmu-miR-16-5p,ENSMUSG00000052684:mmu-miR-16-5p,ENSMUSG00000049791:mmu-miR-19a-3p,ENSMUSG00000030201:mmu-miR-19a-3p
Organismal Systems	Excretory system	Aldosterone-regulated sodium reabsorption	ko04960	4	55	0.0040932	0.019714	ENSMUSG00000027665:mmu-miR-1b-5p,ENSMUSG00000055980:mmu-miR-126a-3p,ENSMUSG00000031834:mmu-miR-126a-3p,ENSMUSG00000020053:mmu-miR-1a-3p
Organismal Systems	Digestive system	Carbohydrate digestion and absorption	ko04973	4	57	0.00465422	0.0210603	ENSMUSG00000019699:mmu-miR-451a,ENSMUSG00000031834:mmu-miR-126a-3p,ENSMUSG00000027665:mmu-miR-1b-5p,ENSMUSG00000029072:mmu-miR-1b-5p
Organismal Systems	Endocrine system	GnRH signaling pathway	ko04912	6	130	0.00460045	0.0210603	ENSMUSG00000052684:mmu-miR-16-5p,ENSMUSG00000001175:mmu-miR-1a-3p,ENSMUSG00000005580:mmu-miR-142a-3p,ENSMUSG00000006699:mmu-miR-1a-3p,ENSMUSG00000027852:mmu-miR-1b-5p,ENSMUSG00000036438:mmu-miR-1a-3p
Metabolism	Lipid metabolism	Glycerophospholipid metabolism	ko00564	6	131	0.00477449	0.0210776	ENSMUSG00000021518:mmu-miR-1b-5p,ENSMUSG00000028517:mmu-miR-16-5p,ENSMUSG00000020593:mmu-miR-1903,ENSMUSG00000033794:mmu-miR-16-5p,ENSMUSG00000058793:mmu-miR-1b-5p,ENSMUSG00000022861:mmu-miR-1903
Cellular Processes	Cell growth and death	Oocyte meiosis	ko04114	8	223	0.0052858	0.0222495	ENSMUSG00000022285:mmu-miR-451a,ENSMUSG00000001175:mmu-miR-1a-3p,ENSMUSG00000005533:mmu-miR-1a-3p,ENSMUSG00000005580:mmu-miR-142a-3p,ENSMUSG00000025586:mmu-miR-1a-3p,ENSMUSG00000025586:mmu-miR-25-3p,ENSMUSG00000036438:mmu-miR-1a-3p,ENSMUSG00000002068:mmu-miR-16-5p,ENSMUSG00000020053:mmu-miR-1a-3p
Organismal Systems	Immune system	T cell receptor signaling pathway	ko04660	8	223	0.0052858	0.0222495	ENSMUSG00000026012:mmu-miR-1b-5p,ENSMUSG00000027665:mmu-miR-1b-5p,ENSMUSG00000006699:mmu-miR-1a-3p,ENSMUSG00000027852:mmu-miR-1b-5p,ENSMUSG00000052684:mmu-miR-16-5p,ENSMUSG00000024401:mmu-miR-19a-3p,ENSMUSG00000031834:mmu-miR-126a-3p,ENSMUSG00000019699:mmu-miR-451a
Organismal Systems	Endocrine system	Glucagon signaling pathway	ko04922	7	195	0.00882216	0.0362912	ENSMUSG00000027104:mmu-miR-1b-5p,ENSMUSG00000027104:mmu-miR-451a,ENSMUSG00000050697:mmu-miR-144-3p,ENSMUSG00000050697:mmu-miR-451a,ENSMUSG00000001175:mmu-miR-1a-3p,ENSMUSG00000020532:mmu-miR-451a,ENSMUSG00000019699:mmu-miR-451a,ENSMUSG00000053007:mmu-miR-16-5p,ENSMUSG00000036438:mmu-miR-1a-3p
Environmental Information Processing	Signal transduction	MAPK signaling pathway - plant	ko04016	3	39	0.0109727	0.0431752	ENSMUSG00000033792:mmu-miR-1b-5p,ENSMUSG00000036438:mmu-miR-1a-3p,ENSMUSG00000001175:mmu-miR-1a-3p
Organismal Systems	Immune system	Chemokine signaling pathway	ko04062	8	253	0.0109104	0.0431752	ENSMUSG00000019699:mmu-miR-451a,ENSMUSG00000035109:mmu-miR-142a-3p,ENSMUSG00000031834:mmu-miR-126a-3p,ENSMUSG00000000001:mmu-miR-451a,ENSMUSG00000027852:mmu-miR-1b-5p,ENSMUSG00000006699:mmu-miR-1a-3p,ENSMUSG00000005580:mmu-miR-142a-3p,ENSMUSG00000027665:mmu-miR-1b-5p
Cellular Processes	Cell growth and death	p53 signaling pathway	ko04115	7	206	0.011691	0.0440848	ENSMUSG00000026029:mmu-miR-1b-5p,ENSMUSG00000020053:mmu-miR-1a-3p,ENSMUSG00000032113:mmu-miR-1b-5p,ENSMUSG00000002068:mmu-miR-16-5p,ENSMUSG00000013663:mmu-miR-19a-3p,ENSMUSG00000013663:mmu-miR-19a-3p,ENSMUSG00000013663:mmu-miR-144-3p,ENSMUSG00000054387:mmu-miR-16-5p,ENSMUSG00000070348:mmu-miR-16-5p
Organismal Systems	Nervous system	Dopaminergic synapse	ko04728	7	206	0.011691	0.0440848	ENSMUSG00000019699:mmu-miR-451a,ENSMUSG00000000001:mmu-miR-451a,ENSMUSG00000036438:mmu-miR-1a-3p,ENSMUSG00000053007:mmu-miR-16-5p,ENSMUSG00000055116:mmu-miR-142a-3p,ENSMUSG00000001175:mmu-miR-1a-3p,ENSMUSG00000027104:mmu-miR-1b-5p,ENSMUSG00000027104:mmu-miR-451a
Organismal Systems	Development	Dorso-ventral axis formation	ko04320	3	41	0.0125795	0.046467	ENSMUSG00000025586:mmu-miR-1a-3p,ENSMUSG00000025586:mmu-miR-25-3p,ENSMUSG00000033644:mmu-miR-1b-5p,ENSMUSG00000032035:mmu-miR-1a-3p
Organismal Systems	Endocrine system	Aldosterone synthesis and secretion	ko04925	5	120	0.0142401	0.0515493	ENSMUSG00000027104:mmu-miR-1b-5p,ENSMUSG00000027104:mmu-miR-451a,ENSMUSG00000001175:mmu-miR-1a-3p,ENSMUSG00000005580:mmu-miR-142a-3p,ENSMUSG00000053007:mmu-miR-16-5p,ENSMUSG00000036438:mmu-miR-1a-3p
Environmental Information Processing	Signal transduction	TGF-beta signaling pathway	ko04350	5	124	0.0162004	0.0574955	ENSMUSG00000041120:mmu-miR-1903,ENSMUSG00000022346:mmu-miR-451a,ENSMUSG00000052155:mmu-miR-1b-5p,ENSMUSG00000024563:mmu-miR-140-3p,ENSMUSG00000024401:mmu-miR-19a-3p
Organismal Systems	Endocrine system	Adipocytokine signaling pathway	ko04920	4	84	0.0177564	0.061806	ENSMUSG00000055980:mmu-miR-126a-3p,ENSMUSG00000050697:mmu-miR-144-3p,ENSMUSG00000050697:mmu-miR-451a,ENSMUSG00000019699:mmu-miR-451a,ENSMUSG00000024401:mmu-miR-19a-3p
Cellular Processes	Cell growth and death	Cell cycle	ko04110	8	281	0.0193338	0.0660267	ENSMUSG00000027490:mmu-miR-1b-5p,ENSMUSG00000024563:mmu-miR-140-3p,ENSMUSG00000022285:mmu-miR-451a,ENSMUSG00000027715:mmu-miR-1b-5p,ENSMUSG00000070348:mmu-miR-16-5p,ENSMUSG00000022346:mmu-miR-451a,ENSMUSG00000002068:mmu-miR-16-5p,ENSMUSG00000032113:mmu-miR-1b-5p
Organismal Systems	Immune system	RIG-I-like receptor signaling pathway	ko04622	4	88	0.0206931	0.0693603	ENSMUSG00000026029:mmu-miR-1b-5p,ENSMUSG00000037523:mmu-miR-1b-5p,ENSMUSG00000027164:mmu-miR-144-3p,ENSMUSG00000024401:mmu-miR-19a-3p
Organismal Systems	Sensory system	Inflammatory mediator regulation of TRP channels	ko04750	6	182	0.02165	0.0712482	ENSMUSG00000005580:mmu-miR-142a-3p,ENSMUSG00000027665:mmu-miR-1b-5p,ENSMUSG00000020053:mmu-miR-1a-3p,ENSMUSG00000031834:mmu-miR-126a-3p,ENSMUSG00000001175:mmu-miR-1a-3p,ENSMUSG00000036438:mmu-miR-1a-3p
Organismal Systems	Nervous system	Long-term depression	ko04730	4	99	0.0302364	0.0977283	ENSMUSG00000000001:mmu-miR-451a,ENSMUSG00000005533:mmu-miR-1a-3p,ENSMUSG00000020053:mmu-miR-1a-3p,ENSMUSG00000027852:mmu-miR-1b-5p
Environmental Information Processing	Signal transduction	Hedgehog signaling pathway	ko04340	3	58	0.0314623	0.0999066	ENSMUSG00000073563:mmu-miR-1b-5p,ENSMUSG00000070348:mmu-miR-16-5p,ENSMUSG00000057329:mmu-miR-16-5p
Organismal Systems	Digestive system	Gastric acid secretion	ko04971	4	101	0.0322079	0.100511	ENSMUSG00000036438:mmu-miR-1a-3p,ENSMUSG00000000001:mmu-miR-451a,ENSMUSG00000005580:mmu-miR-142a-3p,ENSMUSG00000001175:mmu-miR-1a-3p
Cellular Processes	Transport and catabolism	Mitophagy - animal	ko04137	4	104	0.0353035	0.104423	ENSMUSG00000027490:mmu-miR-1b-5p,ENSMUSG00000027852:mmu-miR-1b-5p,ENSMUSG00000021109:mmu-miR-144-3p,ENSMUSG00000052684:mmu-miR-16-5p
Environmental Information Processing	Signaling molecules and interaction	ECM-receptor interaction	ko04512	4	104	0.0353035	0.104423	ENSMUSG00000026193:mmu-miR-1a-3p,ENSMUSG00000026193:mmu-miR-140-3p,ENSMUSG00000029661:mmu-let-7i-5p,ENSMUSG00000027087:mmu-miR-16-5p,ENSMUSG00000032243:mmu-miR-126a-3p
Metabolism	Biosynthesis of other secondary metabolites	Aflatoxin biosynthesis	ko00254	1	3	0.0351105	0.104423	ENSMUSG00000020532:mmu-miR-451a
Metabolism	Lipid metabolism	Ether lipid metabolism	ko00565	3	61	0.035769	0.104423	ENSMUSG00000033794:mmu-miR-16-5p,ENSMUSG00000028517:mmu-miR-16-5p,ENSMUSG00000038173:mmu-miR-144-3p
Organismal Systems	Digestive system	Salivary secretion	ko04970	4	105	0.0363723	0.104498	ENSMUSG00000005580:mmu-miR-142a-3p,ENSMUSG00000001175:mmu-miR-1a-3p,ENSMUSG00000030302:mmu-let-7i-5p,ENSMUSG00000036438:mmu-miR-1a-3p
Organismal Systems	Sensory system	Taste transduction	ko04742	4	107	0.0385655	0.109068	ENSMUSG00000023033:mmu-miR-451a,ENSMUSG00000000560:mmu-miR-1b-5p,ENSMUSG00000029072:mmu-miR-1b-5p,ENSMUSG00000008590:mmu-miR-1903
Organismal Systems	Endocrine system	Insulin secretion	ko04911	4	111	0.0431746	0.119162	ENSMUSG00000005580:mmu-miR-142a-3p,ENSMUSG00000027273:mmu-miR-19a-3p,ENSMUSG00000027104:mmu-miR-1b-5p,ENSMUSG00000027104:mmu-miR-451a,ENSMUSG00000053007:mmu-miR-16-5p
Organismal Systems	Immune system	Th17 cell differentiation	ko04659	6	215	0.0434515	0.119162	ENSMUSG00000021756:mmu-miR-142a-3p,ENSMUSG00000024563:mmu-miR-140-3p,ENSMUSG00000021109:mmu-miR-144-3p,ENSMUSG00000025746:mmu-let-7i-5p,ENSMUSG00000025746:mmu-miR-142a-3p,ENSMUSG00000022952:mmu-miR-126a-3p,ENSMUSG00000052684:mmu-miR-16-5p
Organismal Systems	Immune system	Toll and Imd signaling pathway	ko04624	4	113	0.0455904	0.123162	ENSMUSG00000052684:mmu-miR-16-5p,ENSMUSG00000027104:mmu-miR-1b-5p,ENSMUSG00000027104:mmu-miR-451a,ENSMUSG00000026029:mmu-miR-1b-5p,ENSMUSG00000031392:mmu-miR-142a-3p
Environmental Information Processing	Signal transduction	Phospholipase D signaling pathway	ko04072	9	400	0.0498229	0.132617	ENSMUSG00000005580:mmu-miR-142a-3p,ENSMUSG00000027665:mmu-miR-1b-5p,ENSMUSG00000028517:mmu-miR-16-5p,ENSMUSG00000028945:mmu-miR-1a-3p,ENSMUSG00000027852:mmu-miR-1b-5p,ENSMUSG00000022861:mmu-miR-1903,ENSMUSG00000035109:mmu-miR-142a-3p,ENSMUSG00000031834:mmu-miR-126a-3p,ENSMUSG00000019699:mmu-miR-451a
Organismal Systems	Immune system	IL-17 signaling pathway	ko04657	5	170	0.0521823	0.136884	ENSMUSG00000027164:mmu-miR-144-3p,ENSMUSG00000024401:mmu-miR-19a-3p,ENSMUSG00000052684:mmu-miR-16-5p,ENSMUSG00000025746:mmu-let-7i-5p,ENSMUSG00000025746:mmu-miR-142a-3p,ENSMUSG00000026029:mmu-miR-1b-5p
Cellular Processes	Cell growth and death	Apoptosis - multiple species	ko04215	3	72	0.053983	0.139585	ENSMUSG00000025860:mmu-miR-451a,ENSMUSG00000026029:mmu-miR-1b-5p,ENSMUSG00000057329:mmu-miR-16-5p
Organismal Systems	Environmental adaptation	Circadian rhythm	ko04710	2	37	0.071002	0.178491	ENSMUSG00000050697:mmu-miR-144-3p,ENSMUSG00000050697:mmu-miR-451a,ENSMUSG00000055116:mmu-miR-142a-3p
Organismal Systems	Sensory system	Phototransduction	ko04744	2	37	0.071002	0.178491	ENSMUSG00000036438:mmu-miR-1a-3p,ENSMUSG00000001175:mmu-miR-1a-3p
Environmental Information Processing	Signal transduction	Hippo signaling pathway - multiple species	ko04392	2	39	0.0778063	0.192917	ENSMUSG00000048285:mmu-miR-1b-5p,ENSMUSG00000009073:mmu-let-7i-5p
Organismal Systems	Endocrine system	Thyroid hormone signaling pathway	ko04919	11	572	0.0797308	0.195017	ENSMUSG00000031834:mmu-miR-126a-3p,ENSMUSG00000021109:mmu-miR-144-3p,ENSMUSG00000022346:mmu-miR-451a,ENSMUSG00000027087:mmu-miR-16-5p,ENSMUSG00000021944:mmu-miR-1a-3p,ENSMUSG00000019838:mmu-miR-1b-5p,ENSMUSG00000019699:mmu-miR-451a,ENSMUSG00000070348:mmu-miR-16-5p,ENSMUSG00000028945:mmu-miR-1a-3p,ENSMUSG00000027852:mmu-miR-1b-5p,ENSMUSG00000027665:mmu-miR-1b-5p
Cellular Processes	Cell growth and death	Apoptosis - fly	ko04214	4	139	0.0836175	0.201365	ENSMUSG00000027164:mmu-miR-144-3p,ENSMUSG00000026029:mmu-miR-1b-5p,ENSMUSG00000052684:mmu-miR-16-5p,ENSMUSG00000025860:mmu-miR-451a
Organismal Systems	Endocrine system	Ovarian Steroidogenesis	ko04913	3	87	0.0845511	0.201365	ENSMUSG00000020053:mmu-miR-1a-3p,ENSMUSG00000005533:mmu-miR-1a-3p,ENSMUSG00000005580:mmu-miR-142a-3p
Metabolism	Lipid metabolism	Glycerolipid metabolism	ko00561	3	89	0.089084	0.209405	ENSMUSG00000022861:mmu-miR-1903,ENSMUSG00000020593:mmu-miR-1903,ENSMUSG00000028517:mmu-miR-16-5p
Organismal Systems	Endocrine system	Thyroid hormone synthesis	ko04918	3	91	0.0937167	0.217471	ENSMUSG00000027104:mmu-miR-1b-5p,ENSMUSG00000027104:mmu-miR-451a,ENSMUSG00000005580:mmu-miR-142a-3p,ENSMUSG00000053007:mmu-miR-16-5p
Organismal Systems	Immune system	Cytosolic DNA-sensing pathway	ko04623	3	92	0.0960697	0.220109	ENSMUSG00000037523:mmu-miR-1b-5p,ENSMUSG00000027951:mmu-miR-1a-3p,ENSMUSG00000025746:mmu-let-7i-5p,ENSMUSG00000025746:mmu-miR-142a-3p
Environmental Information Processing	Signaling molecules and interaction	Neuroactive ligand-receptor interaction	ko04080	8	397	0.101231	0.227228	ENSMUSG00000030525:mmu-miR-19a-3p,ENSMUSG00000000560:mmu-miR-1b-5p,ENSMUSG00000039579:mmu-miR-451a,ENSMUSG00000017064:mmu-miR-1b-5p,ENSMUSG00000005268:mmu-miR-1903,ENSMUSG00000052821:mmu-miR-1b-5p,ENSMUSG00000038760:mmu-miR-1b-5p,ENSMUSG00000026251:mmu-miR-19a-3p
Organismal Systems	Environmental adaptation	Circadian rhythm - fly	ko04711	1	9	0.101688	0.227228	ENSMUSG00000055116:mmu-miR-142a-3p
Environmental Information Processing	Signaling molecules and interaction	Cell adhesion molecules (CAMs)	ko04514	6	273	0.106896	0.233111	ENSMUSG00000032076:mmu-miR-16-5p,ENSMUSG00000022762:mmu-miR-25-3p,ENSMUSG00000017652:mmu-miR-16-5p,ENSMUSG00000026012:mmu-miR-1b-5p,ENSMUSG00000016496:mmu-miR-16-5p,ENSMUSG00000027087:mmu-miR-16-5p
Metabolism	Carbohydrate metabolism	Starch and sucrose metabolism	ko00500	2	47	0.106847	0.233111	ENSMUSG00000033400:mmu-miR-1903,ENSMUSG00000030729:mmu-miR-1b-5p
Organismal Systems	Environmental adaptation	Circadian entrainment	ko04713	4	155	0.112775	0.243004	ENSMUSG00000001175:mmu-miR-1a-3p,ENSMUSG00000005580:mmu-miR-142a-3p,ENSMUSG00000000001:mmu-miR-451a,ENSMUSG00000036438:mmu-miR-1a-3p
Environmental Information Processing	Signal transduction	Rap1 signaling pathway	ko04015	13	763	0.122285	0.256857	ENSMUSG00000036438:mmu-miR-1a-3p,ENSMUSG00000023951:mmu-miR-16-5p,ENSMUSG00000023951:mmu-miR-126a-3p,ENSMUSG00000019699:mmu-miR-451a,ENSMUSG00000020053:mmu-miR-1a-3p,ENSMUSG00000031834:mmu-miR-126a-3p,ENSMUSG00000037225:mmu-miR-16-5p,ENSMUSG00000000001:mmu-miR-451a,ENSMUSG00000005533:mmu-miR-1a-3p,ENSMUSG00000027852:mmu-miR-1b-5p,ENSMUSG00000005580:mmu-miR-142a-3p,ENSMUSG00000027665:mmu-miR-1b-5p…
Organismal Systems	Endocrine system	Renin secretion	ko04924	3	103	0.123462	0.256857	ENSMUSG00000001175:mmu-miR-1a-3p,ENSMUSG00000000001:mmu-miR-451a,ENSMUSG00000036438:mmu-miR-1a-3p
Organismal Systems	Nervous system	Serotonergic synapse	ko04726	5	221	0.122995	0.256857	ENSMUSG00000008590:mmu-miR-1903,ENSMUSG00000000001:mmu-miR-451a,ENSMUSG00000022892:mmu-miR-16-5p,ENSMUSG00000027852:mmu-miR-1b-5p,ENSMUSG00000020838:mmu-miR-16-5p
Organismal Systems	Digestive system	Fat digestion and absorption	ko04975	2	52	0.126236	0.259645	ENSMUSG00000028517:mmu-miR-16-5p,ENSMUSG00000015243:mmu-miR-144-3p
Metabolism	Metabolism of other amino acids	Taurine and hypotaurine metabolism	ko00430	1	12	0.133239	0.270969	ENSMUSG00000057134:mmu-miR-1b-5p
Cellular Processes	Cellular community - eukaryotes	Gap junction	ko04540	4	167	0.137193	0.275911	ENSMUSG00000000001:mmu-miR-451a,ENSMUSG00000027852:mmu-miR-1b-5p,ENSMUSG00000005580:mmu-miR-142a-3p,ENSMUSG00000050953:mmu-miR-1a-3p
Metabolism	Metabolism of cofactors and vitamins	Vitamin B6 metabolism	ko00750	1	13	0.143509	0.28544	ENSMUSG00000032788:mmu-miR-1b-5p
Organismal Systems	Nervous system	Glutamatergic synapse	ko04724	4	172	0.147949	0.291073	ENSMUSG00000005580:mmu-miR-142a-3p,ENSMUSG00000037541:mmu-miR-451a,ENSMUSG00000039579:mmu-miR-451a,ENSMUSG00000000001:mmu-miR-451a
Environmental Information Processing	Signal transduction	HIF-1 signaling pathway	ko04066	12	721	0.150361	0.292638	ENSMUSG00000027665:mmu-miR-1b-5p,ENSMUSG00000057329:mmu-miR-16-5p,ENSMUSG00000028495:mmu-miR-1a-3p,ENSMUSG00000005533:mmu-miR-1a-3p,ENSMUSG00000039005:mmu-miR-1b-5p,ENSMUSG00000021109:mmu-miR-144-3p,ENSMUSG00000020053:mmu-miR-1a-3p,ENSMUSG00000031834:mmu-miR-126a-3p,ENSMUSG00000025746:mmu-let-7i-5p,ENSMUSG00000025746:mmu-miR-142a-3p,ENSMUSG00000023951:mmu-miR-16-5p,ENSMUSG00000023951:mmu-miR-126a…
Environmental Information Processing	Signal transduction	NF-kappa B signaling pathway	ko04064	7	372	0.15441	0.294192	ENSMUSG00000025860:mmu-miR-451a,ENSMUSG00000039005:mmu-miR-1b-5p,ENSMUSG00000057329:mmu-miR-16-5p,ENSMUSG00000017652:mmu-miR-16-5p,ENSMUSG00000024401:mmu-miR-19a-3p,ENSMUSG00000027164:mmu-miR-144-3p,ENSMUSG00000031392:mmu-miR-142a-3p
Organismal Systems	Nervous system	Long-term potentiation	ko04720	3	114	0.153304	0.294192	ENSMUSG00000036438:mmu-miR-1a-3p,ENSMUSG00000001175:mmu-miR-1a-3p,ENSMUSG00000027852:mmu-miR-1b-5p
Metabolism	Glycan biosynthesis and metabolism	Glycosaminoglycan biosynthesis - keratan sulfate	ko00533	1	18	0.193066	0.35658	ENSMUSG00000051650:mmu-miR-1b-5p
Metabolism	Lipid metabolism	Fatty acid biosynthesis	ko00061	1	18	0.193066	0.35658	ENSMUSG00000020532:mmu-miR-451a
Organismal Systems	Nervous system	GABAergic synapse	ko04727	3	127	0.191102	0.35658	ENSMUSG00000000560:mmu-miR-1b-5p,ENSMUSG00000005580:mmu-miR-142a-3p,ENSMUSG00000000001:mmu-miR-451a
Organismal Systems	Environmental adaptation	Plant-pathogen interaction	ko04626	2	69	0.196892	0.359974	ENSMUSG00000001175:mmu-miR-1a-3p,ENSMUSG00000036438:mmu-miR-1a-3p
Organismal Systems	Excretory system	Vasopressin-regulated water reabsorption	ko04962	2	71	0.20552	0.371991	ENSMUSG00000005580:mmu-miR-142a-3p,ENSMUSG00000053007:mmu-miR-16-5p
Metabolism	Overview	Fatty acid metabolism	ko01212	2	74	0.218536	0.391633	ENSMUSG00000020532:mmu-miR-451a,ENSMUSG00000062908:mmu-miR-19a-3p
Metabolism	Carbohydrate metabolism	Propanoate metabolism	ko00640	2	79	0.24037	0.418335	ENSMUSG00000062908:mmu-miR-19a-3p,ENSMUSG00000020532:mmu-miR-451a
Metabolism	Glycan biosynthesis and metabolism	Mannose type O-glycan biosyntheis	ko00515	1	23	0.239764	0.418335	ENSMUSG00000037251:mmu-miR-16-5p
Metabolism	Lipid metabolism	Primary bile acid biosynthesis	ko00120	1	23	0.239764	0.418335	ENSMUSG00000038641:mmu-miR-142a-3p
Organismal Systems	Circulatory system	Vascular smooth muscle contraction	ko04270	4	213	0.246193	0.42439	ENSMUSG00000036438:mmu-miR-1a-3p,ENSMUSG00000041616:mmu-miR-1a-3p,ENSMUSG00000005580:mmu-miR-142a-3p,ENSMUSG00000001175:mmu-miR-1a-3p
Metabolism	Glycan biosynthesis and metabolism	Glycosaminoglycan biosynthesis - chondroitin sulfate / dermatan sulfate	ko00532	1	24	0.248775	0.424795	ENSMUSG00000020868:mmu-miR-25-3p
Metabolism	Glycan biosynthesis and metabolism	Glycosaminoglycan degradation	ko00531	1	25	0.25768	0.435889	ENSMUSG00000033540:mmu-miR-16-5p
Cellular Processes	Cell growth and death	Apoptosis	ko04210	10	663	0.262472	0.439883	ENSMUSG00000024401:mmu-miR-19a-3p,ENSMUSG00000027665:mmu-miR-1b-5p,ENSMUSG00000027852:mmu-miR-1b-5p,ENSMUSG00000057329:mmu-miR-16-5p,ENSMUSG00000025860:mmu-miR-451a,ENSMUSG00000052684:mmu-miR-16-5p,ENSMUSG00000019699:mmu-miR-451a,ENSMUSG00000057446:mmu-let-7i-5p,ENSMUSG00000031834:mmu-miR-126a-3p,ENSMUSG00000026029:mmu-miR-1b-5p
Organismal Systems	Immune system	Fc epsilon RI signaling pathway	ko04664	5	294	0.269957	0.448277	ENSMUSG00000024401:mmu-miR-19a-3p,ENSMUSG00000019699:mmu-miR-451a,ENSMUSG00000031834:mmu-miR-126a-3p,ENSMUSG00000027852:mmu-miR-1b-5p,ENSMUSG00000027665:mmu-miR-1b-5p
Metabolism	Glycan biosynthesis and metabolism	Glycosaminoglycan biosynthesis - heparan sulfate / heparin	ko00534	1	28	0.283768	0.454531	ENSMUSG00000020868:mmu-miR-25-3p
Metabolism	Glycan biosynthesis and metabolism	Other types of O-glycan biosynthesis	ko00514	1	28	0.283768	0.454531	ENSMUSG00000046020:mmu-miR-1b-5p
Organismal Systems	Immune system	B cell receptor signaling pathway	ko04662	5	299	0.281268	0.454531	ENSMUSG00000027665:mmu-miR-1b-5p,ENSMUSG00000031834:mmu-miR-126a-3p,ENSMUSG00000027852:mmu-miR-1b-5p,ENSMUSG00000052684:mmu-miR-16-5p,ENSMUSG00000019699:mmu-miR-451a
Organismal Systems	Immune system	Intestinal immune network for IgA production	ko04672	5	297	0.276732	0.454531	ENSMUSG00000025746:mmu-let-7i-5p,ENSMUSG00000025746:mmu-miR-142a-3p,ENSMUSG00000017652:mmu-miR-16-5p,ENSMUSG00000026417:mmu-miR-1903,ENSMUSG00000023206:mmu-miR-1b-5p,ENSMUSG00000026012:mmu-miR-1b-5p
Organismal Systems	Nervous system	Synaptic vesicle cycle	ko04721	2	90	0.288623	0.458253	ENSMUSG00000025867:mmu-miR-1903,ENSMUSG00000027273:mmu-miR-19a-3p
Environmental Information Processing	Signal transduction	Hippo signaling pathway	ko04390	10	698	0.315028	0.495827	ENSMUSG00000041075:mmu-miR-1a-3p,ENSMUSG00000041075:mmu-miR-126a-3p,ENSMUSG00000022346:mmu-miR-451a,ENSMUSG00000009073:mmu-let-7i-5p,ENSMUSG00000070348:mmu-miR-16-5p,ENSMUSG00000009900:mmu-miR-16-5p,ENSMUSG00000048285:mmu-miR-1b-5p,ENSMUSG00000020135:mmu-let-7i-5p,ENSMUSG00000049791:mmu-miR-19a-3p,ENSMUSG00000022285:mmu-miR-451a,ENSMUSG00000024563:mmu-miR-140-3p
Environmental Information Processing	Signal transduction	Notch signaling pathway	ko04330	2	97	0.319189	0.498045	ENSMUSG00000027276:mmu-miR-16-5p,ENSMUSG00000022528:mmu-miR-1a-3p
Metabolism	Carbohydrate metabolism	Inositol phosphate metabolism	ko00562	2	104	0.349433	0.535995	ENSMUSG00000027665:mmu-miR-1b-5p,ENSMUSG00000013663:mmu-miR-19a-3p,ENSMUSG00000013663:mmu-miR-19a-3p,ENSMUSG00000013663:mmu-miR-144-3p
Metabolism	Glycan biosynthesis and metabolism	Glycosylphosphatidylinositol(GPI)-anchor biosynthesis	ko00563	1	36	0.348955	0.535995	ENSMUSG00000034563:mmu-miR-1b-5p
Metabolism	Glycan biosynthesis and metabolism	Glycosphingolipid biosynthesis - lacto and neolacto series	ko00601	1	37	0.356675	0.542506	ENSMUSG00000051650:mmu-miR-1b-5p
Cellular Processes	Transport and catabolism	Lysosome	ko04142	3	189	0.388132	0.557555	ENSMUSG00000057446:mmu-let-7i-5p,ENSMUSG00000033540:mmu-miR-16-5p,ENSMUSG00000000594:mmu-miR-451a
Environmental Information Processing	Signal transduction	Calcium signaling pathway	ko04020	7	503	0.386641	0.557555	ENSMUSG00000001175:mmu-miR-1a-3p,ENSMUSG00000038760:mmu-miR-1b-5p,ENSMUSG00000005580:mmu-miR-142a-3p,ENSMUSG00000052821:mmu-miR-1b-5p,ENSMUSG00000036438:mmu-miR-1a-3p,ENSMUSG00000030525:mmu-miR-19a-3p,ENSMUSG00000030302:mmu-let-7i-5p
Environmental Information Processing	Signal transduction	Hedgehog signaling pathway - fly	ko04341	1	40	0.379295	0.557555	ENSMUSG00000073563:mmu-miR-1b-5p
Metabolism	Amino acid metabolism	Phenylalanine metabolism	ko00360	1	41	0.386657	0.557555	ENSMUSG00000033307:mmu-miR-451a
Metabolism	Glycan biosynthesis and metabolism	Mucin type O-glycan biosynthesis	ko00512	1	41	0.386657	0.557555	ENSMUSG00000009588:mmu-miR-1b-5p
Organismal Systems	Digestive system	Protein digestion and absorption	ko04974	2	112	0.383422	0.557555	ENSMUSG00000019838:mmu-miR-1b-5p,ENSMUSG00000029661:mmu-let-7i-5p
Organismal Systems	Immune system	Natural killer cell mediated cytotoxicity	ko04650	6	416	0.370956	0.557555	ENSMUSG00000027852:mmu-miR-1b-5p,ENSMUSG00000031834:mmu-miR-126a-3p,ENSMUSG00000027665:mmu-miR-1b-5p,ENSMUSG00000035109:mmu-miR-142a-3p,ENSMUSG00000022967:mmu-let-7i-5p,ENSMUSG00000024401:mmu-miR-19a-3p
Organismal Systems	Endocrine system	PPAR signaling pathway	ko03320	2	123	0.42885	0.611195	ENSMUSG00000062908:mmu-miR-19a-3p,ENSMUSG00000030162:mmu-miR-142a-3p
Organismal Systems	Immune system	Fc gamma R-mediated phagocytosis	ko04666	5	364	0.432408	0.611452	ENSMUSG00000027665:mmu-miR-1b-5p,ENSMUSG00000006699:mmu-miR-1a-3p,ENSMUSG00000028517:mmu-miR-16-5p,ENSMUSG00000031834:mmu-miR-126a-3p,ENSMUSG00000019699:mmu-miR-451a
Metabolism	Metabolism of other amino acids	beta-Alanine metabolism	ko00410	1	53	0.468499	0.657352	ENSMUSG00000062908:mmu-miR-19a-3p
Metabolism	Lipid metabolism	Sphingolipid metabolism	ko00600	1	55	0.481039	0.669755	ENSMUSG00000028517:mmu-miR-16-5p
Cellular Processes	Cell motility	Regulation of actin cytoskeleton	ko04810	9	722	0.485322	0.67056	ENSMUSG00000026193:mmu-miR-1a-3p,ENSMUSG00000026193:mmu-miR-140-3p,ENSMUSG00000020135:mmu-let-7i-5p,ENSMUSG00000031834:mmu-miR-126a-3p,ENSMUSG00000027087:mmu-miR-16-5p,ENSMUSG00000037225:mmu-miR-16-5p,ENSMUSG00000032243:mmu-miR-126a-3p,ENSMUSG00000006699:mmu-miR-1a-3p,ENSMUSG00000027665:mmu-miR-1b-5p,ENSMUSG00000027852:mmu-miR-1b-5p
Organismal Systems	Endocrine system	Oxytocin signaling pathway	ko04921	8	641	0.490253	0.672241	ENSMUSG00000070348:mmu-miR-16-5p,ENSMUSG00000036438:mmu-miR-1a-3p,ENSMUSG00000000001:mmu-miR-451a,ENSMUSG00000001175:mmu-miR-1a-3p,ENSMUSG00000050697:mmu-miR-144-3p,ENSMUSG00000050697:mmu-miR-451a,ENSMUSG00000052684:mmu-miR-16-5p,ENSMUSG00000027852:mmu-miR-1b-5p,ENSMUSG00000005580:mmu-miR-142a-3p
Environmental Information Processing	Membrane transport	ABC transporters	ko02010	1	59	0.505242	0.687584	ENSMUSG00000015243:mmu-miR-144-3p
Genetic Information Processing	Replication and repair	DNA replication	ko03030	1	60	0.511114	0.690386	ENSMUSG00000006678:mmu-miR-1a-3p
Metabolism	Amino acid metabolism	Tyrosine metabolism	ko00350	1	61	0.516918	0.693052	ENSMUSG00000033307:mmu-miR-451a
Genetic Information Processing	Translation	Aminoacyl-tRNA biosynthesis	ko00970	1	65	0.539452	0.717947	ENSMUSG00000026618:mmu-miR-1b-5p
Organismal Systems	Digestive system	Pancreatic secretion	ko04972	2	156	0.553348	0.731065	ENSMUSG00000030302:mmu-let-7i-5p,ENSMUSG00000005580:mmu-miR-142a-3p
Metabolism	Amino acid metabolism	Valine, leucine and isoleucine degradation	ko00280	1	70	0.566152	0.731953	ENSMUSG00000062908:mmu-miR-19a-3p
Metabolism	Lipid metabolism	Fatty acid degradation	ko00071	1	69	0.560938	0.731953	ENSMUSG00000062908:mmu-miR-19a-3p
Organismal Systems	Immune system	Th1 and Th2 cell differentiation	ko04658	2	159	0.56368	0.731953	ENSMUSG00000052684:mmu-miR-16-5p,ENSMUSG00000027276:mmu-miR-16-5p
Genetic Information Processing	Replication and repair	Fanconi anemia pathway	ko03460	1	72	0.576394	0.7347	ENSMUSG00000022528:mmu-miR-1a-3p
Genetic Information Processing	Transcription	Basal transcription factors	ko03022	1	72	0.576394	0.7347	ENSMUSG00000028271:mmu-miR-1a-3p
Metabolism	Glycan biosynthesis and metabolism	Various types of N-glycan biosynthesis	ko00513	1	74	0.586396	0.742221	ENSMUSG00000024921:mmu-miR-142a-3p
Organismal Systems	Immune system	Antigen processing and presentation	ko04612	3	264	0.607214	0.763234	ENSMUSG00000057446:mmu-let-7i-5p,ENSMUSG00000024401:mmu-miR-19a-3p,ENSMUSG00000090877:mmu-miR-1a-3p
Cellular Processes	Cell growth and death	Necroptosis	ko04217	7	629	0.618499	0.76677	ENSMUSG00000022967:mmu-let-7i-5p,ENSMUSG00000066551:mmu-miR-142a-3p,ENSMUSG00000024401:mmu-miR-19a-3p,ENSMUSG00000039005:mmu-miR-1b-5p,ENSMUSG00000057329:mmu-miR-16-5p,ENSMUSG00000026029:mmu-miR-1b-5p,ENSMUSG00000025860:mmu-miR-451a
Organismal Systems	Excretory system	Endocrine and other factor-regulated calcium reabsorption	ko04961	1	80	0.615011	0.76677	ENSMUSG00000005580:mmu-miR-142a-3p
Metabolism	Glycan biosynthesis and metabolism	N-Glycan biosynthesis	ko00510	1	83	0.628569	0.773953	ENSMUSG00000024921:mmu-miR-142a-3p
Cellular Processes	Transport and catabolism	Endocytosis	ko04144	7	639	0.634911	0.774222	ENSMUSG00000027164:mmu-miR-144-3p,ENSMUSG00000054387:mmu-miR-16-5p,ENSMUSG00000024563:mmu-miR-140-3p,ENSMUSG00000090877:mmu-miR-1a-3p,ENSMUSG00000006699:mmu-miR-1a-3p,ENSMUSG00000030465:mmu-miR-1b-5p,ENSMUSG00000005533:mmu-miR-1a-3p
Metabolism	Carbohydrate metabolism	Pentose and glucuronate interconversions	ko00040	1	85	0.637343	0.774222	ENSMUSG00000011382:mmu-miR-16-5p
Genetic Information Processing	Folding, sorting and degradation	RNA degradation	ko03018	2	185	0.645986	0.77949	ENSMUSG00000025980:mmu-miR-1a-3p,ENSMUSG00000020423:mmu-miR-25-3p
Environmental Information Processing	Signal transduction	MAPK signaling pathway - yeast	ko04011	2	190	0.660333	0.791525	ENSMUSG00000006699:mmu-miR-1a-3p,ENSMUSG00000054387:mmu-miR-16-5p
Organismal Systems	Nervous system	Retrograde endocannabinoid signaling	ko04723	3	297	0.6856	0.816405	ENSMUSG00000000001:mmu-miR-451a,ENSMUSG00000005580:mmu-miR-142a-3p,ENSMUSG00000000560:mmu-miR-1b-5p
Organismal Systems	Immune system	Platelet activation	ko04611	6	585	0.694366	0.82144	ENSMUSG00000031834:mmu-miR-126a-3p,ENSMUSG00000005580:mmu-miR-142a-3p,ENSMUSG00000027665:mmu-miR-1b-5p,ENSMUSG00000000001:mmu-miR-451a,ENSMUSG00000019699:mmu-miR-451a,ENSMUSG00000029661:mmu-let-7i-5p
Organismal Systems	Digestive system	Bile secretion	ko04976	1	106	0.717875	0.842145	ENSMUSG00000005580:mmu-miR-142a-3p
Organismal Systems	Immune system	Hematopoietic cell lineage	ko04640	3	314	0.721174	0.842145	ENSMUSG00000025746:mmu-let-7i-5p,ENSMUSG00000025746:mmu-miR-142a-3p,ENSMUSG00000024401:mmu-miR-19a-3p,ENSMUSG00000005364:mmu-miR-25-3p
Genetic Information Processing	Folding, sorting and degradation	Ubiquitin mediated proteolysis	ko04120	6	621	0.747122	0.85588	ENSMUSG00000025860:mmu-miR-451a,ENSMUSG00000069053:mmu-miR-144-3p,ENSMUSG00000069053:mmu-miR-25-3p,ENSMUSG00000031930:mmu-miR-25-3p,ENSMUSG00000027164:mmu-miR-144-3p,ENSMUSG00000054387:mmu-miR-16-5p,ENSMUSG00000028086:mmu-miR-25-3p
Metabolism	Carbohydrate metabolism	Pyruvate metabolism	ko00620	1	115	0.746676	0.85588	ENSMUSG00000020532:mmu-miR-451a
Organismal Systems	Immune system	Complement and coagulation cascades	ko04610	1	114	0.743626	0.85588	ENSMUSG00000074743:mmu-miR-451a
Cellular Processes	Cell growth and death	Meiosis - yeast	ko04113	1	122	0.767034	0.873165	ENSMUSG00000032113:mmu-miR-1b-5p
Cellular Processes	Cellular community - eukaryotes	Tight junction	ko04530	8	833	0.773349	0.874851	ENSMUSG00000021944:mmu-miR-1a-3p,ENSMUSG00000070348:mmu-miR-16-5p,ENSMUSG00000009073:mmu-let-7i-5p,ENSMUSG00000006699:mmu-miR-1a-3p,ENSMUSG00000052684:mmu-miR-16-5p,ENSMUSG00000050697:mmu-miR-144-3p,ENSMUSG00000050697:mmu-miR-451a,ENSMUSG00000022952:mmu-miR-126a-3p,ENSMUSG00000054387:mmu-miR-16-5p
Metabolism	Xenobiotics biodegradation and metabolism	Metabolism of xenobiotics by cytochrome P450	ko00980	1	132	0.79332	0.89187	ENSMUSG00000011382:mmu-miR-16-5p
Cellular Processes	Cell growth and death	Cell cycle - yeast	ko04111	1	139	0.809941	0.899382	ENSMUSG00000032113:mmu-miR-1b-5p
Metabolism	Amino acid metabolism	Cysteine and methionine metabolism	ko00270	1	137	0.805333	0.899382	ENSMUSG00000004099:mmu-miR-126a-3p
Genetic Information Processing	Translation	Ribosome biogenesis in eukaryotes	ko03008	1	159	0.850442	0.938597	ENSMUSG00000025266:mmu-let-7i-5p
Metabolism	Lipid metabolism	Steroid hormone biosynthesis	ko00140	1	167	0.86412	0.947913	ENSMUSG00000038641:mmu-miR-142a-3p
Organismal Systems	Circulatory system	Cardiac muscle contraction	ko04260	1	172	0.872028	0.950825	ENSMUSG00000040752:mmu-miR-1a-3p
Metabolism	Nucleotide metabolism	Purine metabolism	ko00230	2	311	0.885204	0.955092	ENSMUSG00000006678:mmu-miR-1a-3p,ENSMUSG00000005580:mmu-miR-142a-3p
Metabolism	Nucleotide metabolism	Pyrimidine metabolism	ko00240	1	182	0.886494	0.955092	ENSMUSG00000006678:mmu-miR-1a-3p
Genetic Information Processing	Folding, sorting and degradation	Protein processing in endoplasmic reticulum	ko04141	2	333	0.906976	0.959493	ENSMUSG00000057329:mmu-miR-16-5p,ENSMUSG00000090877:mmu-miR-1a-3p
Genetic Information Processing	Replication and repair	Base excision repair	ko03410	1	203	0.911783	0.959493	ENSMUSG00000066551:mmu-miR-142a-3p
Genetic Information Processing	Translation	mRNA surveillance pathway	ko03015	1	202	0.910718	0.959493	ENSMUSG00000069769:mmu-let-7i-5p
Organismal Systems	Immune system	Leukocyte transendothelial migration	ko04670	4	573	0.910143	0.959493	ENSMUSG00000000001:mmu-miR-451a,ENSMUSG00000031834:mmu-miR-126a-3p,ENSMUSG00000027665:mmu-miR-1b-5p,ENSMUSG00000006699:mmu-miR-1a-3p
Environmental Information Processing	Signal transduction	Hippo signaling pathway -fly	ko04391	4	591	0.921789	0.964415	ENSMUSG00000022346:mmu-miR-451a,ENSMUSG00000002068:mmu-miR-16-5p,ENSMUSG00000022285:mmu-miR-451a,ENSMUSG00000009073:mmu-let-7i-5p
Cellular Processes	Cellular community - eukaryotes	Adherens junction	ko04520	3	522	0.948296	0.986446	ENSMUSG00000024563:mmu-miR-140-3p,ENSMUSG00000005533:mmu-miR-1a-3p,ENSMUSG00000006699:mmu-miR-1a-3p
Cellular Processes	Transport and catabolism	Phagosome	ko04145	4	948	0.996456	1	ENSMUSG00000030162:mmu-miR-142a-3p,ENSMUSG00000027087:mmu-miR-16-5p,ENSMUSG00000039005:mmu-miR-1b-5p,ENSMUSG00000057446:mmu-let-7i-5p
Genetic Information Processing	Transcription	Spliceosome	ko03040	2	489	0.980538	1	ENSMUSG00000090877:mmu-miR-1a-3p,ENSMUSG00000039449:mmu-miR-1b-5p
Genetic Information Processing	Translation	Ribosome	ko03010	3	2708	1	1	ENSMUSG00000028495:mmu-miR-1a-3p,ENSMUSG00000030744:mmu-miR-1b-5p,ENSMUSG00000058174:mmu-miR-25-3p
Genetic Information Processing	Translation	RNA transport	ko03013	2	463	0.974555	1	ENSMUSG00000001855:mmu-let-7i-5p,ENSMUSG00000053293:mmu-miR-451a
Metabolism	Overview	Carbon metabolism	ko01200	1	685	0.999744	1	ENSMUSG00000062908:mmu-miR-19a-3p
Organismal Systems	Sensory system	Olfactory transduction	ko04740	2	1498	1	1	ENSMUSG00000036438:mmu-miR-1a-3p,ENSMUSG00000001175:mmu-miR-1a-3p
Organismal Systems	Sensory system	Phototransduction - fly	ko04745	2	442	0.968463	1	ENSMUSG00000036438:mmu-miR-1a-3p,ENSMUSG00000001175:mmu-miR-1a-3p

## Sheet: ADNS_vs_ADF.DEG.KEGG_enrichment
Pathway Hierarchy1	Pathway Hierarchy2	KEGG Pathway	Pathway ID	Gene Number	Background number	P-Value	Q-Value	Gene IDs
Environmental Information Processing	Signal transduction	Sphingolipid signaling pathway	ko04071	12	177	1.9205e-05	0.00257816	ENSMUSG00000057329:mmu-miR-466i-5p,ENSMUSG00000028245:mmu-miR-451a,ENSMUSG00000020611:mmu-miR-466i-5p,ENSMUSG00000020901:mmu-miR-466i-5p,ENSMUSG00000000001:mmu-miR-451a,ENSMUSG00000024887:mmu-miR-466i-5p,ENSMUSG00000019699:mmu-miR-451a,ENSMUSG00000067586:mmu-miR-574-5p,ENSMUSG00000051177:mmu-miR-466i-5p,ENSMUSG00000013663:mmu-miR-19a-3p,ENSMUSG00000013663:mmu-miR-19a-3p,ENSMUSG00000024401:mmu-miR…
Organismal Systems	Immune system	Toll-like receptor signaling pathway	ko04620	10	127	2.64426e-05	0.00257816	ENSMUSG00000026029:mmu-miR-466i-5p,ENSMUSG00000022967:mmu-let-7i-5p,ENSMUSG00000019699:mmu-miR-451a,ENSMUSG00000024401:mmu-miR-19a-3p,ENSMUSG00000053137:mmu-miR-466i-5p,ENSMUSG00000025746:mmu-let-7i-5p,ENSMUSG00000016024:mmu-miR-466i-5p,ENSMUSG00000025779:mmu-miR-466i-5p,ENSMUSG00000028284:mmu-miR-466i-5p,ENSMUSG00000020901:mmu-miR-466i-5p
Environmental Information Processing	Signal transduction	cGMP - PKG signaling pathway	ko04022	14	268	7.22312e-05	0.00281702	ENSMUSG00000044951:mmu-miR-466i-5p,ENSMUSG00000044951:mmu-miR-574-5p,ENSMUSG00000051177:mmu-miR-466i-5p,ENSMUSG00000033016:mmu-miR-466i-5p,ENSMUSG00000019699:mmu-miR-451a,ENSMUSG00000030302:mmu-let-7i-5p,ENSMUSG00000020611:mmu-miR-466i-5p,ENSMUSG00000054640:mmu-miR-466i-5p,ENSMUSG00000031376:mmu-miR-466i-5p,ENSMUSG00000027104:mmu-miR-451a,ENSMUSG00000014956:mmu-miR-574-5p,ENSMUSG00000079055:mmu-m…
Environmental Information Processing	Signal transduction	FoxO signaling pathway	ko04068	12	197	5.4972e-05	0.00281702	ENSMUSG00000027381:mmu-miR-466i-5p,ENSMUSG00000005533:mmu-miR-466i-5p,ENSMUSG00000013663:mmu-miR-19a-3p,ENSMUSG00000013663:mmu-miR-19a-3p,ENSMUSG00000053137:mmu-miR-466i-5p,ENSMUSG00000025746:mmu-let-7i-5p,ENSMUSG00000002603:mmu-miR-130b-3p,ENSMUSG00000019699:mmu-miR-451a,ENSMUSG00000005534:mmu-miR-466i-5p,ENSMUSG00000050697:mmu-miR-451a,ENSMUSG00000020901:mmu-miR-466i-5p,ENSMUSG00000020184:mmu-m…
Organismal Systems	Development	Osteoclast differentiation	ko04380	11	170	6.5002e-05	0.00281702	ENSMUSG00000053137:mmu-miR-466i-5p,ENSMUSG00000024401:mmu-miR-19a-3p,ENSMUSG00000002699:mmu-miR-466i-5p,ENSMUSG00000023964:mmu-miR-466i-5p,ENSMUSG00000002603:mmu-miR-130b-3p,ENSMUSG00000033016:mmu-miR-466i-5p,ENSMUSG00000022967:mmu-let-7i-5p,ENSMUSG00000019699:mmu-miR-451a,ENSMUSG00000020901:mmu-miR-466i-5p,ENSMUSG00000028284:mmu-miR-466i-5p,ENSMUSG00000039239:mmu-miR-466i-5p
Organismal Systems	Development	Axon guidance	ko04360	13	248	0.000125543	0.00408016	ENSMUSG00000030257:mmu-miR-466i-5p,ENSMUSG00000020901:mmu-miR-466i-5p,ENSMUSG00000000001:mmu-miR-451a,ENSMUSG00000022231:mmu-miR-466i-5p,ENSMUSG00000027716:mmu-miR-451a,ENSMUSG00000019647:mmu-miR-466i-5p,ENSMUSG00000026235:mmu-miR-466i-5p,ENSMUSG00000063626:mmu-miR-466i-5p,ENSMUSG00000001761:mmu-miR-466i-5p,ENSMUSG00000028289:mmu-miR-466i-5p,ENSMUSG00000031391:mmu-miR-466i-5p,ENSMUSG00000041845:m…
Environmental Information Processing	Signaling molecules and interaction	Neuroactive ligand-receptor interaction	ko04080	16	397	0.000446782	0.00909691	ENSMUSG00000071489:mmu-miR-466i-5p,ENSMUSG00000030043:mmu-miR-466i-5p,ENSMUSG00000041078:mmu-miR-466i-5p,ENSMUSG00000001986:mmu-miR-466i-5p,ENSMUSG00000001986:mmu-miR-574-5p,ENSMUSG00000023964:mmu-miR-466i-5p,ENSMUSG00000044338:mmu-miR-466i-5p,ENSMUSG00000049112:mmu-miR-466i-5p,ENSMUSG00000000766:mmu-miR-466i-5p,ENSMUSG00000020081:mmu-miR-466i-5p,ENSMUSG00000050541:mmu-miR-466i-5p,ENSMUSG00000035…
Environmental Information Processing	Signal transduction	AMPK signaling pathway	ko04152	10	178	0.000433297	0.00909691	ENSMUSG00000036707:mmu-miR-451a,ENSMUSG00000020901:mmu-miR-466i-5p,ENSMUSG00000005534:mmu-miR-466i-5p,ENSMUSG00000050697:mmu-miR-451a,ENSMUSG00000027715:mmu-miR-466i-5p,ENSMUSG00000020532:mmu-miR-451a,ENSMUSG00000028284:mmu-miR-466i-5p,ENSMUSG00000005533:mmu-miR-466i-5p,ENSMUSG00000025202:mmu-miR-466i-5p,ENSMUSG00000019699:mmu-miR-451a
Environmental Information Processing	Signal transduction	TNF signaling pathway	ko04668	9	142	0.000346618	0.00909691	ENSMUSG00000020901:mmu-miR-466i-5p,ENSMUSG00000028284:mmu-miR-466i-5p,ENSMUSG00000026070:mmu-miR-466i-5p,ENSMUSG00000027104:mmu-miR-451a,ENSMUSG00000053137:mmu-miR-466i-5p,ENSMUSG00000024401:mmu-miR-19a-3p,ENSMUSG00000025746:mmu-let-7i-5p,ENSMUSG00000026029:mmu-miR-466i-5p,ENSMUSG00000019699:mmu-miR-451a
Organismal Systems	Immune system	NOD-like receptor signaling pathway	ko04621	13	284	0.000466508	0.00909691	ENSMUSG00000022967:mmu-let-7i-5p,ENSMUSG00000066800:mmu-miR-466i-5p,ENSMUSG00000066800:mmu-miR-574-5p,ENSMUSG00000051177:mmu-miR-466i-5p,ENSMUSG00000026029:mmu-miR-466i-5p,ENSMUSG00000025746:mmu-let-7i-5p,ENSMUSG00000024401:mmu-miR-19a-3p,ENSMUSG00000053137:mmu-miR-466i-5p,ENSMUSG00000057329:mmu-miR-466i-5p,ENSMUSG00000028284:mmu-miR-466i-5p,ENSMUSG00000021948:mmu-miR-466i-5p,ENSMUSG00000025860:m…
Organismal Systems	Circulatory system	Adrenergic signaling in cardiomyocytes	ko04261	11	221	0.000632113	0.0112056	ENSMUSG00000050541:mmu-miR-466i-5p,ENSMUSG00000000001:mmu-miR-451a,ENSMUSG00000027104:mmu-miR-451a,ENSMUSG00000014956:mmu-miR-574-5p,ENSMUSG00000057329:mmu-miR-466i-5p,ENSMUSG00000031376:mmu-miR-466i-5p,ENSMUSG00000030302:mmu-let-7i-5p,ENSMUSG00000053137:mmu-miR-466i-5p,ENSMUSG00000019699:mmu-miR-451a,ENSMUSG00000051177:mmu-miR-466i-5p,ENSMUSG00000010066:mmu-miR-466i-5p
Cellular Processes	Cellular community - eukaryotes	Signaling pathways regulating pluripotency of stem cells	ko04550	10	191	0.000750012	0.0121877	ENSMUSG00000020901:mmu-miR-466i-5p,ENSMUSG00000022346:mmu-miR-451a,ENSMUSG00000020135:mmu-let-7i-5p,ENSMUSG00000005533:mmu-miR-466i-5p,ENSMUSG00000053137:mmu-miR-466i-5p,ENSMUSG00000049791:mmu-miR-19a-3p,ENSMUSG00000019699:mmu-miR-451a,ENSMUSG00000038872:mmu-miR-466i-5p,ENSMUSG00000054263:mmu-miR-466i-5p,ENSMUSG00000038518:mmu-miR-466i-5p
Metabolism	Overview	Fatty acid metabolism	ko01212	6	74	0.000945027	0.0141754	ENSMUSG00000020532:mmu-miR-451a,ENSMUSG00000025202:mmu-miR-466i-5p,ENSMUSG00000022853:mmu-miR-466i-5p,ENSMUSG00000021786:mmu-miR-466i-5p,ENSMUSG00000062908:mmu-miR-19a-3p,ENSMUSG00000041220:mmu-miR-466i-5p
Organismal Systems	Nervous system	Dopaminergic synapse	ko04728	10	206	0.00133061	0.0177798	ENSMUSG00000027104:mmu-miR-451a,ENSMUSG00000014956:mmu-miR-574-5p,ENSMUSG00000000001:mmu-miR-451a,ENSMUSG00000051177:mmu-miR-466i-5p,ENSMUSG00000025037:mmu-miR-574-5p,ENSMUSG00000019699:mmu-miR-451a,ENSMUSG00000053137:mmu-miR-466i-5p,ENSMUSG00000001986:mmu-miR-466i-5p,ENSMUSG00000001986:mmu-miR-574-5p,ENSMUSG00000027669:mmu-miR-466i-5p,ENSMUSG00000024524:mmu-miR-466i-5p
Organismal Systems	Nervous system	Glutamatergic synapse	ko04724	9	172	0.00136768	0.0177798	ENSMUSG00000027669:mmu-miR-466i-5p,ENSMUSG00000001986:mmu-miR-466i-5p,ENSMUSG00000001986:mmu-miR-574-5p,ENSMUSG00000051177:mmu-miR-466i-5p,ENSMUSG00000037541:mmu-miR-451a,ENSMUSG00000001985:mmu-miR-466i-5p,ENSMUSG00000039579:mmu-miR-451a,ENSMUSG00000000001:mmu-miR-451a,ENSMUSG00000042249:mmu-miR-466i-5p,ENSMUSG00000005089:mmu-miR-466i-5p
Organismal Systems	Immune system	RIG-I-like receptor signaling pathway	ko04622	6	88	0.0023135	0.0281958	ENSMUSG00000024401:mmu-miR-19a-3p,ENSMUSG00000053137:mmu-miR-466i-5p,ENSMUSG00000037523:mmu-miR-466i-5p,ENSMUSG00000026029:mmu-miR-466i-5p,ENSMUSG00000027854:mmu-miR-466i-5p,ENSMUSG00000028284:mmu-miR-466i-5p
Organismal Systems	Aging	Longevity regulating pathway - mammal	ko04211	7	120	0.00250093	0.0286871	ENSMUSG00000005534:mmu-miR-466i-5p,ENSMUSG00000050697:mmu-miR-451a,ENSMUSG00000005533:mmu-miR-466i-5p,ENSMUSG00000020901:mmu-miR-466i-5p,ENSMUSG00000040760:mmu-miR-466i-5p,ENSMUSG00000019699:mmu-miR-451a,ENSMUSG00000027104:mmu-miR-451a
Organismal Systems	Nervous system	Cholinergic synapse	ko04725	8	158	0.00305164	0.0330595	ENSMUSG00000027669:mmu-miR-466i-5p,ENSMUSG00000030525:mmu-miR-130b-3p,ENSMUSG00000030525:mmu-miR-19a-3p,ENSMUSG00000051177:mmu-miR-466i-5p,ENSMUSG00000019699:mmu-miR-451a,ENSMUSG00000020901:mmu-miR-466i-5p,ENSMUSG00000000001:mmu-miR-451a,ENSMUSG00000057329:mmu-miR-466i-5p,ENSMUSG00000035200:mmu-miR-466i-5p
Environmental Information Processing	Signal transduction	MAPK signaling pathway	ko04010	13	364	0.00422525	0.0433644	ENSMUSG00000023050:mmu-miR-130b-3p,ENSMUSG00000023050:mmu-miR-19a-3p,ENSMUSG00000032413:mmu-miR-466i-5p,ENSMUSG00000028284:mmu-miR-466i-5p,ENSMUSG00000039239:mmu-miR-466i-5p,ENSMUSG00000025278:mmu-miR-466i-5p,ENSMUSG00000027104:mmu-miR-451a,ENSMUSG00000024401:mmu-miR-19a-3p,ENSMUSG00000053137:mmu-miR-466i-5p,ENSMUSG00000022346:mmu-miR-451a,ENSMUSG00000010066:mmu-miR-466i-5p,ENSMUSG00000033016:mmu…
Cellular Processes	Cell growth and death	Apoptosis - multiple species	ko04215	5	72	0.00491203	0.0478923	ENSMUSG00000026029:mmu-miR-466i-5p,ENSMUSG00000057329:mmu-miR-466i-5p,ENSMUSG00000027381:mmu-miR-466i-5p,ENSMUSG00000000120:mmu-miR-466i-5p,ENSMUSG00000025860:mmu-miR-451a
Environmental Information Processing	Signal transduction	Wnt signaling pathway	ko04310	9	214	0.00585688	0.0543853	ENSMUSG00000028284:mmu-miR-466i-5p,ENSMUSG00000030201:mmu-miR-19a-3p,ENSMUSG00000031548:mmu-miR-466i-5p,ENSMUSG00000033016:mmu-miR-466i-5p,ENSMUSG00000051177:mmu-miR-466i-5p,ENSMUSG00000049791:mmu-miR-19a-3p,ENSMUSG00000022346:mmu-miR-451a,ENSMUSG00000020135:mmu-let-7i-5p,ENSMUSG00000038192:mmu-miR-466i-5p
Organismal Systems	Immune system	T cell receptor signaling pathway	ko04660	9	223	0.00759242	0.0672965	ENSMUSG00000026012:mmu-miR-466i-5p,ENSMUSG00000019699:mmu-miR-451a,ENSMUSG00000033016:mmu-miR-466i-5p,ENSMUSG00000023274:mmu-miR-466i-5p,ENSMUSG00000024401:mmu-miR-19a-3p,ENSMUSG00000053137:mmu-miR-466i-5p,ENSMUSG00000002699:mmu-miR-466i-5p,ENSMUSG00000028284:mmu-miR-466i-5p,ENSMUSG00000020901:mmu-miR-466i-5p
Environmental Information Processing	Signaling molecules and interaction	Cytokine-cytokine receptor interaction	ko04060	11	318	0.0102119	0.0796526	ENSMUSG00000029375:mmu-miR-466i-5p,ENSMUSG00000039239:mmu-miR-466i-5p,ENSMUSG00000059326:mmu-miR-466i-5p,ENSMUSG00000026070:mmu-miR-466i-5p,ENSMUSG00000000120:mmu-miR-466i-5p,ENSMUSG00000054263:mmu-miR-466i-5p,ENSMUSG00000002603:mmu-miR-130b-3p,ENSMUSG00000022967:mmu-let-7i-5p,ENSMUSG00000024401:mmu-miR-19a-3p,ENSMUSG00000068105:mmu-miR-466i-5p,ENSMUSG00000025746:mmu-let-7i-5p
Metabolism	Lipid metabolism	Sphingolipid metabolism	ko00600	4	55	0.00991168	0.0796526	ENSMUSG00000005899:mmu-miR-466i-5p,ENSMUSG00000056124:mmu-miR-466i-5p,ENSMUSG00000007038:mmu-miR-466i-5p,ENSMUSG00000024887:mmu-miR-466i-5p
Organismal Systems	Excretory system	Aldosterone-regulated sodium reabsorption	ko04960	4	55	0.00991168	0.0796526	ENSMUSG00000024589:mmu-miR-466i-5p,ENSMUSG00000020901:mmu-miR-466i-5p,ENSMUSG00000005534:mmu-miR-466i-5p,ENSMUSG00000041248:mmu-miR-466i-5p
Environmental Information Processing	Signal transduction	cAMP signaling pathway	ko04024	10	279	0.0111185	0.0833889	ENSMUSG00000019699:mmu-miR-451a,ENSMUSG00000033016:mmu-miR-466i-5p,ENSMUSG00000039579:mmu-miR-451a,ENSMUSG00000001986:mmu-miR-466i-5p,ENSMUSG00000001986:mmu-miR-574-5p,ENSMUSG00000049112:mmu-miR-466i-5p,ENSMUSG00000014956:mmu-miR-574-5p,ENSMUSG00000030302:mmu-let-7i-5p,ENSMUSG00000031376:mmu-miR-466i-5p,ENSMUSG00000000001:mmu-miR-451a,ENSMUSG00000020901:mmu-miR-466i-5p
Environmental Information Processing	Signal transduction	Phosphatidylinositol signaling system	ko04070	6	131	0.0155143	0.112048	ENSMUSG00000051177:mmu-miR-466i-5p,ENSMUSG00000026925:mmu-miR-130b-3p,ENSMUSG00000022861:mmu-miR-466i-5p,ENSMUSG00000020901:mmu-miR-466i-5p,ENSMUSG00000013663:mmu-miR-19a-3p,ENSMUSG00000013663:mmu-miR-19a-3p,ENSMUSG00000058793:mmu-miR-466i-5p
Environmental Information Processing	Signal transduction	Jak-STAT signaling pathway	ko04630	8	216	0.0184193	0.123854	ENSMUSG00000059326:mmu-miR-466i-5p,ENSMUSG00000057329:mmu-miR-466i-5p,ENSMUSG00000020901:mmu-miR-466i-5p,ENSMUSG00000022967:mmu-let-7i-5p,ENSMUSG00000019699:mmu-miR-451a,ENSMUSG00000054263:mmu-miR-466i-5p,ENSMUSG00000025746:mmu-let-7i-5p,ENSMUSG00000022346:mmu-miR-451a
Organismal Systems	Nervous system	Long-term depression	ko04730	5	99	0.0180276	0.123854	ENSMUSG00000005533:mmu-miR-466i-5p,ENSMUSG00000000001:mmu-miR-451a,ENSMUSG00000001986:mmu-miR-466i-5p,ENSMUSG00000001986:mmu-miR-574-5p,ENSMUSG00000020611:mmu-miR-466i-5p,ENSMUSG00000051177:mmu-miR-466i-5p
Organismal Systems	Digestive system	Gastric acid secretion	ko04971	5	101	0.0194838	0.126645	ENSMUSG00000041248:mmu-miR-466i-5p,ENSMUSG00000051497:mmu-miR-466i-5p,ENSMUSG00000000001:mmu-miR-451a,ENSMUSG00000051177:mmu-miR-466i-5p,ENSMUSG00000044951:mmu-miR-466i-5p,ENSMUSG00000044951:mmu-miR-574-5p
Metabolism	Lipid metabolism	Biosynthesis of unsaturated fatty acids	ko01040	3	41	0.0245737	0.154576	ENSMUSG00000041220:mmu-miR-466i-5p,ENSMUSG00000025202:mmu-miR-466i-5p,ENSMUSG00000021226:mmu-miR-466i-5p
Environmental Information Processing	Signal transduction	Apelin signaling pathway	ko04371	10	320	0.0260956	0.156293	ENSMUSG00000054640:mmu-miR-466i-5p,ENSMUSG00000020611:mmu-miR-466i-5p,ENSMUSG00000079055:mmu-miR-466i-5p,ENSMUSG00000000001:mmu-miR-451a,ENSMUSG00000050697:mmu-miR-451a,ENSMUSG00000044951:mmu-miR-466i-5p,ENSMUSG00000044951:mmu-miR-574-5p,ENSMUSG00000051177:mmu-miR-466i-5p,ENSMUSG00000019699:mmu-miR-451a,ENSMUSG00000044338:mmu-miR-466i-5p,ENSMUSG00000027669:mmu-miR-466i-5p
Environmental Information Processing	Signal transduction	MAPK signaling pathway - fly	ko04013	6	148	0.0264495	0.156293	ENSMUSG00000053137:mmu-miR-466i-5p,ENSMUSG00000019779:mmu-miR-466i-5p,ENSMUSG00000022285:mmu-miR-451a,ENSMUSG00000028284:mmu-miR-466i-5p,ENSMUSG00000025658:mmu-miR-466i-5p,ENSMUSG00000027104:mmu-miR-451a
Organismal Systems	Endocrine system	Regulation of lipolysis in adipocyte	ko04923	4	75	0.0279053	0.160045	ENSMUSG00000019699:mmu-miR-451a,ENSMUSG00000020901:mmu-miR-466i-5p,ENSMUSG00000005534:mmu-miR-466i-5p,ENSMUSG00000000001:mmu-miR-451a
Metabolism	Lipid metabolism	Fatty acid biosynthesis	ko00061	2	18	0.0303062	0.164158	ENSMUSG00000020532:mmu-miR-451a,ENSMUSG00000021786:mmu-miR-466i-5p
Organismal Systems	Immune system	Toll and Imd signaling pathway	ko04624	5	113	0.0298407	0.164158	ENSMUSG00000053137:mmu-miR-466i-5p,ENSMUSG00000027104:mmu-miR-451a,ENSMUSG00000026029:mmu-miR-466i-5p,ENSMUSG00000032826:mmu-miR-466i-5p,ENSMUSG00000028284:mmu-miR-466i-5p
Metabolism	Carbohydrate metabolism	Propanoate metabolism	ko00640	4	79	0.0329182	0.173488	ENSMUSG00000062908:mmu-miR-19a-3p,ENSMUSG00000027452:mmu-miR-466i-5p,ENSMUSG00000022853:mmu-miR-466i-5p,ENSMUSG00000020532:mmu-miR-451a
Cellular Processes	Transport and catabolism	Autophagy - animal	ko04140	10	346	0.0410208	0.199341	ENSMUSG00000050697:mmu-miR-451a,ENSMUSG00000021939:mmu-miR-574-5p,ENSMUSG00000020901:mmu-miR-466i-5p,ENSMUSG00000021948:mmu-miR-466i-5p,ENSMUSG00000028284:mmu-miR-466i-5p,ENSMUSG00000057329:mmu-miR-466i-5p,ENSMUSG00000057446:mmu-let-7i-5p,ENSMUSG00000005533:mmu-miR-466i-5p,ENSMUSG00000013663:mmu-miR-19a-3p,ENSMUSG00000013663:mmu-miR-19a-3p,ENSMUSG00000019699:mmu-miR-451a
Environmental Information Processing	Signal transduction	VEGF signaling pathway	ko04370	4	88	0.0460018	0.199341	ENSMUSG00000019699:mmu-miR-451a,ENSMUSG00000028071:mmu-miR-466i-5p,ENSMUSG00000053137:mmu-miR-466i-5p,ENSMUSG00000020901:mmu-miR-466i-5p
Metabolism	Biosynthesis of other secondary metabolites	Aflatoxin biosynthesis	ko00254	1	3	0.0451332	0.199341	ENSMUSG00000020532:mmu-miR-451a
Metabolism	Metabolism of cofactors and vitamins	Biotin metabolism	ko00780	1	3	0.0451332	0.199341	ENSMUSG00000021786:mmu-miR-466i-5p
Organismal Systems	Aging	Longevity regulating pathway - multiple species	ko04213	5	123	0.0407035	0.199341	ENSMUSG00000020901:mmu-miR-466i-5p,ENSMUSG00000050697:mmu-miR-451a,ENSMUSG00000005533:mmu-miR-466i-5p,ENSMUSG00000005534:mmu-miR-466i-5p,ENSMUSG00000019699:mmu-miR-451a
Organismal Systems	Aging	Longevity regulating pathway - worm	ko04212	6	166	0.0426065	0.199341	ENSMUSG00000013663:mmu-miR-19a-3p,ENSMUSG00000013663:mmu-miR-19a-3p,ENSMUSG00000053137:mmu-miR-466i-5p,ENSMUSG00000005534:mmu-miR-466i-5p,ENSMUSG00000022285:mmu-miR-451a,ENSMUSG00000025202:mmu-miR-466i-5p,ENSMUSG00000019699:mmu-miR-451a
Organismal Systems	Endocrine system	Estrogen signaling pathway	ko04915	7	212	0.0449642	0.199341	ENSMUSG00000000766:mmu-miR-466i-5p,ENSMUSG00000000001:mmu-miR-451a,ENSMUSG00000020901:mmu-miR-466i-5p,ENSMUSG00000021948:mmu-miR-466i-5p,ENSMUSG00000051177:mmu-miR-466i-5p,ENSMUSG00000019699:mmu-miR-451a,ENSMUSG00000027104:mmu-miR-451a
Organismal Systems	Immune system	Chemokine signaling pathway	ko04062	8	253	0.041391	0.199341	ENSMUSG00000042249:mmu-miR-466i-5p,ENSMUSG00000000001:mmu-miR-451a,ENSMUSG00000020901:mmu-miR-466i-5p,ENSMUSG00000021948:mmu-miR-466i-5p,ENSMUSG00000029375:mmu-miR-466i-5p,ENSMUSG00000027669:mmu-miR-466i-5p,ENSMUSG00000051177:mmu-miR-466i-5p,ENSMUSG00000019699:mmu-miR-451a
Organismal Systems	Immune system	Th17 cell differentiation	ko04659	7	215	0.0478443	0.202818	ENSMUSG00000053137:mmu-miR-466i-5p,ENSMUSG00000022952:mmu-miR-466i-5p,ENSMUSG00000037992:mmu-miR-466i-5p,ENSMUSG00000025746:mmu-let-7i-5p,ENSMUSG00000002603:mmu-miR-130b-3p,ENSMUSG00000033016:mmu-miR-466i-5p,ENSMUSG00000023274:mmu-miR-466i-5p
Environmental Information Processing	Signal transduction	mTOR signaling pathway	ko04150	10	359	0.050329	0.208812	ENSMUSG00000050697:mmu-miR-451a,ENSMUSG00000005534:mmu-miR-466i-5p,ENSMUSG00000036707:mmu-miR-451a,ENSMUSG00000020901:mmu-miR-466i-5p,ENSMUSG00000030201:mmu-miR-19a-3p,ENSMUSG00000005533:mmu-miR-466i-5p,ENSMUSG00000024401:mmu-miR-19a-3p,ENSMUSG00000013663:mmu-miR-19a-3p,ENSMUSG00000013663:mmu-miR-19a-3p,ENSMUSG00000019699:mmu-miR-451a,ENSMUSG00000049791:mmu-miR-19a-3p
Environmental Information Processing	Signal transduction	Hedgehog signaling pathway	ko04340	3	58	0.0589759	0.238685	ENSMUSG00000042249:mmu-miR-466i-5p,ENSMUSG00000001761:mmu-miR-466i-5p,ENSMUSG00000057329:mmu-miR-466i-5p
Organismal Systems	Nervous system	Neurotrophin signaling pathway	ko04722	6	181	0.0599772	0.238685	ENSMUSG00000057329:mmu-miR-466i-5p,ENSMUSG00000019699:mmu-miR-451a,ENSMUSG00000021948:mmu-miR-466i-5p,ENSMUSG00000020901:mmu-miR-466i-5p,ENSMUSG00000000120:mmu-miR-466i-5p,ENSMUSG00000053137:mmu-miR-466i-5p
Genetic Information Processing	Translation	Aminoacyl-tRNA biosynthesis	ko00970	3	65	0.0773502	0.292468	ENSMUSG00000037851:mmu-miR-466i-5p,ENSMUSG00000004233:mmu-miR-466i-5p,ENSMUSG00000029536:mmu-miR-466i-5p
Organismal Systems	Digestive system	Salivary secretion	ko04970	4	105	0.0774785	0.292468	ENSMUSG00000051177:mmu-miR-466i-5p,ENSMUSG00000031376:mmu-miR-466i-5p,ENSMUSG00000030302:mmu-let-7i-5p,ENSMUSG00000050541:mmu-miR-466i-5p
Organismal Systems	Endocrine system	Progesterone-mediated oocyte maturation	ko04914	6	194	0.0779915	0.292468	ENSMUSG00000053137:mmu-miR-466i-5p,ENSMUSG00000020901:mmu-miR-466i-5p,ENSMUSG00000027715:mmu-miR-466i-5p,ENSMUSG00000005533:mmu-miR-466i-5p,ENSMUSG00000000001:mmu-miR-451a,ENSMUSG00000019699:mmu-miR-451a
Environmental Information Processing	Signal transduction	Calcium signaling pathway	ko04020	12	503	0.0867799	0.319285	ENSMUSG00000020081:mmu-miR-466i-5p,ENSMUSG00000050541:mmu-miR-466i-5p,ENSMUSG00000079055:mmu-miR-466i-5p,ENSMUSG00000030043:mmu-miR-466i-5p,ENSMUSG00000054640:mmu-miR-466i-5p,ENSMUSG00000030302:mmu-let-7i-5p,ENSMUSG00000031376:mmu-miR-466i-5p,ENSMUSG00000024524:mmu-miR-466i-5p,ENSMUSG00000030525:mmu-miR-130b-3p,ENSMUSG00000030525:mmu-miR-19a-3p,ENSMUSG00000049112:mmu-miR-466i-5p,ENSMUSG0000004495…
Organismal Systems	Endocrine system	Insulin secretion	ko04911	4	111	0.0906144	0.327219	ENSMUSG00000027273:mmu-miR-19a-3p,ENSMUSG00000027273:mmu-miR-466i-5p,ENSMUSG00000061601:mmu-miR-466i-5p,ENSMUSG00000027104:mmu-miR-451a,ENSMUSG00000051177:mmu-miR-466i-5p
Environmental Information Processing	Signal transduction	PI3K-Akt signaling pathway	ko04151	19	908	0.10469	0.344054	ENSMUSG00000022346:mmu-miR-451a,ENSMUSG00000013663:mmu-miR-19a-3p,ENSMUSG00000013663:mmu-miR-19a-3p,ENSMUSG00000027381:mmu-miR-466i-5p,ENSMUSG00000039115:mmu-miR-466i-5p,ENSMUSG00000022285:mmu-miR-451a,ENSMUSG00000020184:mmu-miR-466i-5p,ENSMUSG00000000120:mmu-miR-466i-5p,ENSMUSG00000005534:mmu-miR-466i-5p,ENSMUSG00000022967:mmu-let-7i-5p,ENSMUSG00000019699:mmu-miR-451a,ENSMUSG00000025746:mmu-let-…
Metabolism	Glycan biosynthesis and metabolism	Various types of N-glycan biosynthesis	ko00513	3	74	0.104135	0.344054	ENSMUSG00000037306:mmu-miR-466i-5p,ENSMUSG00000038886:mmu-miR-466i-5p,ENSMUSG00000024921:mmu-miR-466i-5p
Metabolism	Metabolism of cofactors and vitamins	Folate biosynthesis	ko00790	2	37	0.109391	0.344054	ENSMUSG00000021707:mmu-miR-466i-5p,ENSMUSG00000064120:mmu-miR-466i-5p
Metabolism	Xenobiotics biodegradation and metabolism	Caprolactam degradation	ko00930	1	7	0.102166	0.344054	ENSMUSG00000022853:mmu-miR-466i-5p
Organismal Systems	Circulatory system	Vascular smooth muscle contraction	ko04270	6	213	0.109197	0.344054	ENSMUSG00000014956:mmu-miR-574-5p,ENSMUSG00000020611:mmu-miR-466i-5p,ENSMUSG00000044951:mmu-miR-466i-5p,ENSMUSG00000044951:mmu-miR-574-5p,ENSMUSG00000051177:mmu-miR-466i-5p,ENSMUSG00000050541:mmu-miR-466i-5p,ENSMUSG00000021948:mmu-miR-466i-5p
Organismal Systems	Endocrine system	Prolactin signaling pathway	ko04917	4	116	0.102319	0.344054	ENSMUSG00000019699:mmu-miR-451a,ENSMUSG00000020901:mmu-miR-466i-5p,ENSMUSG00000053137:mmu-miR-466i-5p,ENSMUSG00000018899:mmu-miR-130b-3p
Organismal Systems	Environmental adaptation	Circadian rhythm	ko04710	2	37	0.109391	0.344054	ENSMUSG00000050697:mmu-miR-451a,ENSMUSG00000036192:mmu-miR-466i-5p
Organismal Systems	Immune system	Th1 and Th2 cell differentiation	ko04658	5	159	0.0973537	0.344054	ENSMUSG00000070691:mmu-miR-466i-5p,ENSMUSG00000053137:mmu-miR-466i-5p,ENSMUSG00000023274:mmu-miR-466i-5p,ENSMUSG00000033016:mmu-miR-466i-5p,ENSMUSG00000055435:mmu-miR-466i-5p
Organismal Systems	Endocrine system	Aldosterone synthesis and secretion	ko04925	4	120	0.112156	0.34715	ENSMUSG00000039145:mmu-miR-466i-5p,ENSMUSG00000026826:mmu-miR-466i-5p,ENSMUSG00000051177:mmu-miR-466i-5p,ENSMUSG00000027104:mmu-miR-451a
Cellular Processes	Transport and catabolism	Endocytosis	ko04144	14	639	0.114338	0.348372	ENSMUSG00000030465:mmu-miR-466i-5p,ENSMUSG00000039239:mmu-miR-466i-5p,ENSMUSG00000024347:mmu-miR-466i-5p,ENSMUSG00000037643:mmu-miR-466i-5p,ENSMUSG00000031600:mmu-miR-466i-5p,ENSMUSG00000042249:mmu-miR-466i-5p,ENSMUSG00000036995:mmu-miR-466i-5p,ENSMUSG00000020184:mmu-miR-466i-5p,ENSMUSG00000031488:mmu-miR-466i-5p,ENSMUSG00000024589:mmu-miR-466i-5p,ENSMUSG00000002603:mmu-miR-130b-3p,ENSMUSG0000004…
Environmental Information Processing	Signal transduction	Hippo signaling pathway - multiple species	ko04392	2	39	0.119369	0.354403	ENSMUSG00000009073:mmu-let-7i-5p,ENSMUSG00000027339:mmu-miR-466i-5p
Organismal Systems	Immune system	IL-17 signaling pathway	ko04657	5	170	0.119952	0.354403	ENSMUSG00000026029:mmu-miR-466i-5p,ENSMUSG00000028284:mmu-miR-466i-5p,ENSMUSG00000025746:mmu-let-7i-5p,ENSMUSG00000053137:mmu-miR-466i-5p,ENSMUSG00000024401:mmu-miR-19a-3p
Environmental Information Processing	Signal transduction	TGF-beta signaling pathway	ko04350	4	124	0.122395	0.356225	ENSMUSG00000024401:mmu-miR-19a-3p,ENSMUSG00000022346:mmu-miR-451a,ENSMUSG00000039239:mmu-miR-466i-5p,ENSMUSG00000002603:mmu-miR-130b-3p
Metabolism	Amino acid metabolism	Phenylalanine metabolism	ko00360	2	41	0.12956	0.371533	ENSMUSG00000033307:mmu-miR-451a,ENSMUSG00000025037:mmu-miR-574-5p
Metabolism	Glycan biosynthesis and metabolism	N-Glycan biosynthesis	ko00510	3	83	0.134005	0.375318	ENSMUSG00000037306:mmu-miR-466i-5p,ENSMUSG00000024921:mmu-miR-466i-5p,ENSMUSG00000038886:mmu-miR-466i-5p
Metabolism	Lipid metabolism	Fatty acid elongation	ko00062	2	42	0.13473	0.375318	ENSMUSG00000021226:mmu-miR-466i-5p,ENSMUSG00000041220:mmu-miR-466i-5p
Cellular Processes	Cell growth and death	Cell cycle	ko04110	7	281	0.140641	0.375684	ENSMUSG00000027715:mmu-miR-466i-5p,ENSMUSG00000022346:mmu-miR-451a,ENSMUSG00000020184:mmu-miR-466i-5p,ENSMUSG00000039239:mmu-miR-466i-5p,ENSMUSG00000022285:mmu-miR-451a,ENSMUSG00000002603:mmu-miR-130b-3p,ENSMUSG00000069089:mmu-miR-466i-5p
Metabolism	Carbohydrate metabolism	Butanoate metabolism	ko00650	2	43	0.139944	0.375684	ENSMUSG00000030945:mmu-miR-466i-5p,ENSMUSG00000022853:mmu-miR-466i-5p
Organismal Systems	Endocrine system	Adipocytokine signaling pathway	ko04920	3	84	0.137491	0.375684	ENSMUSG00000024401:mmu-miR-19a-3p,ENSMUSG00000050697:mmu-miR-451a,ENSMUSG00000019699:mmu-miR-451a
Organismal Systems	Sensory system	Inflammatory mediator regulation of TRP channels	ko04750	5	182	0.147128	0.387702	ENSMUSG00000053137:mmu-miR-466i-5p,ENSMUSG00000020901:mmu-miR-466i-5p,ENSMUSG00000021948:mmu-miR-466i-5p,ENSMUSG00000051177:mmu-miR-466i-5p,ENSMUSG00000014956:mmu-miR-574-5p
Genetic Information Processing	Folding, sorting and degradation	Sulfur relay system	ko04122	1	11	0.1558	0.40508	ENSMUSG00000064120:mmu-miR-466i-5p
Cellular Processes	Transport and catabolism	Lysosome	ko04142	5	189	0.164088	0.421015	ENSMUSG00000000594:mmu-miR-451a,ENSMUSG00000057446:mmu-let-7i-5p,ENSMUSG00000021939:mmu-miR-574-5p,ENSMUSG00000007038:mmu-miR-466i-5p,ENSMUSG00000049624:mmu-miR-466i-5p
Metabolism	Metabolism of other amino acids	Taurine and hypotaurine metabolism	ko00430	1	12	0.168701	0.427231	ENSMUSG00000057134:mmu-miR-466i-5p
Metabolism	Metabolism of cofactors and vitamins	Vitamin B6 metabolism	ko00750	1	13	0.181406	0.447775	ENSMUSG00000032788:mmu-miR-466i-5p
Organismal Systems	Endocrine system	Glucagon signaling pathway	ko04922	5	195	0.179215	0.447775	ENSMUSG00000019699:mmu-miR-451a,ENSMUSG00000020532:mmu-miR-451a,ENSMUSG00000027104:mmu-miR-451a,ENSMUSG00000051177:mmu-miR-466i-5p,ENSMUSG00000050697:mmu-miR-451a
Organismal Systems	Immune system	Platelet activation	ko04611	12	585	0.18706	0.455959	ENSMUSG00000051177:mmu-miR-466i-5p,ENSMUSG00000044951:mmu-miR-466i-5p,ENSMUSG00000044951:mmu-miR-574-5p,ENSMUSG00000019699:mmu-miR-451a,ENSMUSG00000053137:mmu-miR-466i-5p,ENSMUSG00000002699:mmu-miR-466i-5p,ENSMUSG00000020611:mmu-miR-466i-5p,ENSMUSG00000037643:mmu-miR-466i-5p,ENSMUSG00000029661:mmu-let-7i-5p,ENSMUSG00000014956:mmu-miR-574-5p,ENSMUSG00000020901:mmu-miR-466i-5p,ENSMUSG00000000001:mm…
Environmental Information Processing	Signal transduction	Ras signaling pathway	ko04014	8	363	0.193417	0.461479	ENSMUSG00000000120:mmu-miR-466i-5p,ENSMUSG00000020901:mmu-miR-466i-5p,ENSMUSG00000005534:mmu-miR-466i-5p,ENSMUSG00000032413:mmu-miR-466i-5p,ENSMUSG00000005533:mmu-miR-466i-5p,ENSMUSG00000070565:mmu-miR-466i-5p,ENSMUSG00000027669:mmu-miR-466i-5p,ENSMUSG00000019699:mmu-miR-451a
Metabolism	Metabolism of other amino acids	beta-Alanine metabolism	ko00410	2	53	0.194058	0.461479	ENSMUSG00000022853:mmu-miR-466i-5p,ENSMUSG00000062908:mmu-miR-19a-3p
Environmental Information Processing	Signaling molecules and interaction	ECM-receptor interaction	ko04512	3	104	0.212679	0.467936	ENSMUSG00000039115:mmu-miR-466i-5p,ENSMUSG00000032243:mmu-miR-466i-5p,ENSMUSG00000029661:mmu-let-7i-5p
Metabolism	Amino acid metabolism	Tryptophan metabolism	ko00380	2	57	0.216397	0.467936	ENSMUSG00000022853:mmu-miR-466i-5p,ENSMUSG00000025037:mmu-miR-574-5p
Metabolism	Carbohydrate metabolism	Inositol phosphate metabolism	ko00562	3	104	0.212679	0.467936	ENSMUSG00000013663:mmu-miR-19a-3p,ENSMUSG00000013663:mmu-miR-19a-3p,ENSMUSG00000026925:mmu-miR-130b-3p,ENSMUSG00000051177:mmu-miR-466i-5p
Metabolism	Glycan biosynthesis and metabolism	Glycosphingolipid biosynthesis - globo and isoglobo series	ko00603	1	16	0.21837	0.467936	ENSMUSG00000030283:mmu-miR-466i-5p
Metabolism	Xenobiotics biodegradation and metabolism	Aminobenzoate degradation	ko00627	1	15	0.206238	0.467936	ENSMUSG00000022853:mmu-miR-466i-5p
Organismal Systems	Digestive system	Carbohydrate digestion and absorption	ko04973	2	57	0.216397	0.467936	ENSMUSG00000020901:mmu-miR-466i-5p,ENSMUSG00000019699:mmu-miR-451a
Organismal Systems	Digestive system	Pancreatic secretion	ko04972	4	156	0.216346	0.467936	ENSMUSG00000051177:mmu-miR-466i-5p,ENSMUSG00000031376:mmu-miR-466i-5p,ENSMUSG00000030302:mmu-let-7i-5p,ENSMUSG00000060961:mmu-miR-466i-5p
Organismal Systems	Endocrine system	Renin secretion	ko04924	3	103	0.208719	0.467936	ENSMUSG00000021939:mmu-miR-574-5p,ENSMUSG00000000001:mmu-miR-451a,ENSMUSG00000051177:mmu-miR-466i-5p
Organismal Systems	Environmental adaptation	Circadian entrainment	ko04713	4	155	0.213148	0.467936	ENSMUSG00000001986:mmu-miR-466i-5p,ENSMUSG00000001986:mmu-miR-574-5p,ENSMUSG00000027669:mmu-miR-466i-5p,ENSMUSG00000000001:mmu-miR-451a,ENSMUSG00000051177:mmu-miR-466i-5p
Metabolism	Amino acid metabolism	Alanine, aspartate and glutamate metabolism	ko00250	2	59	0.227653	0.482524	ENSMUSG00000029992:mmu-miR-466i-5p,ENSMUSG00000048142:mmu-miR-466i-5p
Cellular Processes	Transport and catabolism	Autophagy - yeast	ko04138	3	110	0.236757	0.486662	ENSMUSG00000030534:mmu-miR-466i-5p,ENSMUSG00000040843:mmu-miR-466i-5p,ENSMUSG00000078908:mmu-miR-466i-5p
Environmental Information Processing	Signaling molecules and interaction	Cell adhesion molecules (CAMs)	ko04514	6	273	0.240251	0.486662	ENSMUSG00000039115:mmu-miR-466i-5p,ENSMUSG00000016496:mmu-miR-466i-5p,ENSMUSG00000039542:mmu-miR-466i-5p,ENSMUSG00000031391:mmu-miR-466i-5p,ENSMUSG00000023274:mmu-miR-466i-5p,ENSMUSG00000026012:mmu-miR-466i-5p
Metabolism	Amino acid metabolism	Tyrosine metabolism	ko00350	2	61	0.238948	0.486662	ENSMUSG00000033307:mmu-miR-451a,ENSMUSG00000025037:mmu-miR-574-5p
Metabolism	Glycan biosynthesis and metabolism	Glycosaminoglycan biosynthesis - keratan sulfate	ko00533	1	18	0.242083	0.486662	ENSMUSG00000033350:mmu-miR-466i-5p
Metabolism	Glycan biosynthesis and metabolism	Glycosphingolipid biosynthesis - ganglio series	ko00604	1	18	0.242083	0.486662	ENSMUSG00000030283:mmu-miR-466i-5p
Organismal Systems	Digestive system	Protein digestion and absorption	ko04974	3	112	0.244888	0.487276	ENSMUSG00000079055:mmu-miR-466i-5p,ENSMUSG00000029661:mmu-let-7i-5p,ENSMUSG00000054640:mmu-miR-466i-5p
Metabolism	Metabolism of cofactors and vitamins	Porphyrin and chlorophyll metabolism	ko00860	2	64	0.255937	0.504118	ENSMUSG00000024588:mmu-miR-466i-5p,ENSMUSG00000040018:mmu-miR-466i-5p
Metabolism	Amino acid metabolism	Valine, leucine and isoleucine degradation	ko00280	2	70	0.28994	0.533957	ENSMUSG00000022853:mmu-miR-466i-5p,ENSMUSG00000062908:mmu-miR-19a-3p
Metabolism	Biosynthesis of other secondary metabolites	Isoquinoline alkaloid biosynthesis	ko00950	1	21	0.276314	0.533957	ENSMUSG00000025037:mmu-miR-574-5p
Metabolism	Energy metabolism	Carbon fixation pathways in prokaryotes	ko00720	1	22	0.287378	0.533957	ENSMUSG00000027452:mmu-miR-466i-5p
Metabolism	Glycan biosynthesis and metabolism	Other glycan degradation	ko00511	1	22	0.287378	0.533957	ENSMUSG00000007038:mmu-miR-466i-5p
Metabolism	Lipid metabolism	Fatty acid degradation	ko00071	2	69	0.284279	0.533957	ENSMUSG00000062908:mmu-miR-19a-3p,ENSMUSG00000022853:mmu-miR-466i-5p
Organismal Systems	Endocrine system	Insulin signaling pathway	ko04910	7	346	0.279029	0.533957	ENSMUSG00000020532:mmu-miR-451a,ENSMUSG00000014956:mmu-miR-574-5p,ENSMUSG00000037643:mmu-miR-466i-5p,ENSMUSG00000019699:mmu-miR-451a,ENSMUSG00000020901:mmu-miR-466i-5p,ENSMUSG00000050697:mmu-miR-451a,ENSMUSG00000005534:mmu-miR-466i-5p
Organismal Systems	Endocrine system	PPAR signaling pathway	ko03320	3	123	0.290253	0.533957	ENSMUSG00000062908:mmu-miR-19a-3p,ENSMUSG00000022853:mmu-miR-466i-5p,ENSMUSG00000025202:mmu-miR-466i-5p
Genetic Information Processing	Transcription	Basal transcription factors	ko03022	2	72	0.301243	0.548995	ENSMUSG00000069089:mmu-miR-466i-5p,ENSMUSG00000021639:mmu-miR-466i-5p
Genetic Information Processing	Replication and repair	Nucleotide excision repair	ko03420	2	74	0.312516	0.564265	ENSMUSG00000021639:mmu-miR-466i-5p,ENSMUSG00000069089:mmu-miR-466i-5p
Organismal Systems	Endocrine system	GnRH signaling pathway	ko04912	3	130	0.319447	0.571487	ENSMUSG00000051177:mmu-miR-466i-5p,ENSMUSG00000053137:mmu-miR-466i-5p,ENSMUSG00000021948:mmu-miR-466i-5p
Metabolism	Amino acid metabolism	Lysine degradation	ko00310	2	76	0.323749	0.573919	ENSMUSG00000022853:mmu-miR-466i-5p,ENSMUSG00000045098:mmu-miR-466i-5p
Environmental Information Processing	Signal transduction	ErbB signaling pathway	ko04012	3	132	0.327801	0.575866	ENSMUSG00000022346:mmu-miR-451a,ENSMUSG00000020901:mmu-miR-466i-5p,ENSMUSG00000019699:mmu-miR-451a
Environmental Information Processing	Signal transduction	NF-kappa B signaling pathway	ko04064	7	372	0.34209	0.593999	ENSMUSG00000068105:mmu-miR-466i-5p,ENSMUSG00000024401:mmu-miR-19a-3p,ENSMUSG00000025860:mmu-miR-451a,ENSMUSG00000016024:mmu-miR-466i-5p,ENSMUSG00000025779:mmu-miR-466i-5p,ENSMUSG00000028284:mmu-miR-466i-5p,ENSMUSG00000057329:mmu-miR-466i-5p
Metabolism	Glycan biosynthesis and metabolism	Other types of O-glycan biosynthesis	ko00514	1	28	0.350307	0.593999	ENSMUSG00000035245:mmu-miR-466i-5p
Organismal Systems	Excretory system	Endocrine and other factor-regulated calcium reabsorption	ko04961	2	80	0.346066	0.593999	ENSMUSG00000022479:mmu-miR-466i-5p,ENSMUSG00000051177:mmu-miR-466i-5p
Organismal Systems	Immune system	Hematopoietic cell lineage	ko04640	6	314	0.347896	0.593999	ENSMUSG00000004609:mmu-miR-466i-5p,ENSMUSG00000025746:mmu-let-7i-5p,ENSMUSG00000028076:mmu-miR-466i-5p,ENSMUSG00000024401:mmu-miR-19a-3p,ENSMUSG00000059326:mmu-miR-466i-5p,ENSMUSG00000023274:mmu-miR-466i-5p
Cellular Processes	Cell growth and death	Apoptosis - fly	ko04214	3	139	0.357004	0.595007	ENSMUSG00000025860:mmu-miR-451a,ENSMUSG00000026029:mmu-miR-466i-5p,ENSMUSG00000028284:mmu-miR-466i-5p
Organismal Systems	Endocrine system	Melanogenesis	ko04916	3	139	0.357004	0.595007	ENSMUSG00000049791:mmu-miR-19a-3p,ENSMUSG00000051177:mmu-miR-466i-5p,ENSMUSG00000000001:mmu-miR-451a
Cellular Processes	Cellular community - eukaryotes	Focal adhesion	ko04510	12	691	0.366697	0.605983	ENSMUSG00000044951:mmu-miR-466i-5p,ENSMUSG00000044951:mmu-miR-574-5p,ENSMUSG00000019699:mmu-miR-451a,ENSMUSG00000039115:mmu-miR-466i-5p,ENSMUSG00000005533:mmu-miR-466i-5p,ENSMUSG00000013663:mmu-miR-19a-3p,ENSMUSG00000013663:mmu-miR-19a-3p,ENSMUSG00000025278:mmu-miR-466i-5p,ENSMUSG00000057329:mmu-miR-466i-5p,ENSMUSG00000032243:mmu-miR-466i-5p,ENSMUSG00000029661:mmu-let-7i-5p,ENSMUSG00000014956:mmu…
Organismal Systems	Excretory system	Proximal tubule bicarbonate reclamation	ko04964	1	30	0.370026	0.606346	ENSMUSG00000060961:mmu-miR-466i-5p
Cellular Processes	Cell growth and death	p53 signaling pathway	ko04115	4	206	0.385998	0.622	ENSMUSG00000026029:mmu-miR-466i-5p,ENSMUSG00000027663:mmu-miR-423-5p,ENSMUSG00000013663:mmu-miR-19a-3p,ENSMUSG00000013663:mmu-miR-19a-3p,ENSMUSG00000020184:mmu-miR-466i-5p
Metabolism	Metabolism of cofactors and vitamins	One carbon pool by folate	ko00670	1	32	0.389149	0.622	ENSMUSG00000021707:mmu-miR-466i-5p
Organismal Systems	Endocrine system	Ovarian Steroidogenesis	ko04913	2	87	0.384497	0.622	ENSMUSG00000005534:mmu-miR-466i-5p,ENSMUSG00000005533:mmu-miR-466i-5p
Organismal Systems	Nervous system	Synaptic vesicle cycle	ko04721	2	90	0.400671	0.63521	ENSMUSG00000027273:mmu-miR-19a-3p,ENSMUSG00000027273:mmu-miR-466i-5p,ENSMUSG00000028456:mmu-miR-466i-5p
Organismal Systems	Digestive system	Mineral absorption	ko04978	2	92	0.411343	0.636602	ENSMUSG00000015653:mmu-miR-466i-5p,ENSMUSG00000022479:mmu-miR-466i-5p
Organismal Systems	Endocrine system	Thyroid hormone synthesis	ko04918	2	91	0.406019	0.636602	ENSMUSG00000027104:mmu-miR-451a,ENSMUSG00000051177:mmu-miR-466i-5p
Organismal Systems	Immune system	Cytosolic DNA-sensing pathway	ko04623	2	92	0.411343	0.636602	ENSMUSG00000025746:mmu-let-7i-5p,ENSMUSG00000037523:mmu-miR-466i-5p
Metabolism	Glycan biosynthesis and metabolism	Glycosylphosphatidylinositol(GPI)-anchor biosynthesis	ko00563	1	36	0.425674	0.653593	ENSMUSG00000034563:mmu-miR-466i-5p
Metabolism	Amino acid metabolism	Histidine metabolism	ko00340	1	37	0.434459	0.656043	ENSMUSG00000025037:mmu-miR-574-5p
Metabolism	Glycan biosynthesis and metabolism	Glycosphingolipid biosynthesis - lacto and neolacto series	ko00601	1	37	0.434459	0.656043	ENSMUSG00000030283:mmu-miR-466i-5p
Organismal Systems	Nervous system	Serotonergic synapse	ko04726	4	221	0.437362	0.656043	ENSMUSG00000051177:mmu-miR-466i-5p,ENSMUSG00000025037:mmu-miR-574-5p,ENSMUSG00000000001:mmu-miR-451a,ENSMUSG00000027669:mmu-miR-466i-5p
Environmental Information Processing	Signal transduction	Hedgehog signaling pathway - fly	ko04341	1	40	0.46002	0.684762	ENSMUSG00000001761:mmu-miR-466i-5p
Metabolism	Glycan biosynthesis and metabolism	Mucin type O-glycan biosynthesis	ko00512	1	41	0.468281	0.686578	ENSMUSG00000091387:mmu-miR-466i-5p
Organismal Systems	Immune system	Fc epsilon RI signaling pathway	ko04664	5	294	0.467452	0.686578	ENSMUSG00000019699:mmu-miR-451a,ENSMUSG00000002699:mmu-miR-466i-5p,ENSMUSG00000024401:mmu-miR-19a-3p,ENSMUSG00000020901:mmu-miR-466i-5p,ENSMUSG00000053137:mmu-miR-466i-5p
Organismal Systems	Nervous system	Retrograde endocannabinoid signaling	ko04723	5	297	0.476253	0.693054	ENSMUSG00000051177:mmu-miR-466i-5p,ENSMUSG00000001986:mmu-miR-466i-5p,ENSMUSG00000001986:mmu-miR-574-5p,ENSMUSG00000027669:mmu-miR-466i-5p,ENSMUSG00000053137:mmu-miR-466i-5p,ENSMUSG00000000001:mmu-miR-451a
Genetic Information Processing	Folding, sorting and degradation	SNARE interactions in vesicular transport	ko04130	1	43	0.484428	0.694584	ENSMUSG00000027287:mmu-miR-466i-5p
Organismal Systems	Digestive system	Bile secretion	ko04976	2	106	0.483196	0.694584	ENSMUSG00000063796:mmu-miR-466i-5p,ENSMUSG00000060961:mmu-miR-466i-5p
Organismal Systems	Sensory system	Taste transduction	ko04742	2	107	0.488121	0.69477	ENSMUSG00000075318:mmu-miR-466i-5p,ENSMUSG00000023033:mmu-miR-451a
Cellular Processes	Transport and catabolism	Mitophagy - yeast	ko04139	1	48	0.522687	0.728028	ENSMUSG00000053137:mmu-miR-466i-5p
Metabolism	Metabolism of cofactors and vitamins	Nicotinate and nicotinamide metabolism	ko00760	1	48	0.522687	0.728028	ENSMUSG00000042751:mmu-miR-466i-5p
Organismal Systems	Nervous system	Long-term potentiation	ko04720	2	114	0.521756	0.728028	ENSMUSG00000014956:mmu-miR-574-5p,ENSMUSG00000051177:mmu-miR-466i-5p
Metabolism	Carbohydrate metabolism	Pyruvate metabolism	ko00620	2	115	0.526439	0.728054	ENSMUSG00000027452:mmu-miR-466i-5p,ENSMUSG00000020532:mmu-miR-451a
Environmental Information Processing	Signal transduction	Two-component system	ko02020	1	50	0.537185	0.737684	ENSMUSG00000040018:mmu-miR-466i-5p
Metabolism	Amino acid metabolism	Arginine and proline metabolism	ko00330	2	123	0.562775	0.767421	ENSMUSG00000051048:mmu-miR-466i-5p,ENSMUSG00000025037:mmu-miR-574-5p
Environmental Information Processing	Signal transduction	Phospholipase D signaling pathway	ko04072	6	400	0.574588	0.773925	ENSMUSG00000005534:mmu-miR-466i-5p,ENSMUSG00000020901:mmu-miR-466i-5p,ENSMUSG00000022861:mmu-miR-466i-5p,ENSMUSG00000051177:mmu-miR-466i-5p,ENSMUSG00000020611:mmu-miR-466i-5p,ENSMUSG00000019699:mmu-miR-451a
Organismal Systems	Immune system	Antigen processing and presentation	ko04612	4	264	0.575483	0.773925	ENSMUSG00000023274:mmu-miR-466i-5p,ENSMUSG00000024401:mmu-miR-19a-3p,ENSMUSG00000057446:mmu-let-7i-5p,ENSMUSG00000021939:mmu-miR-574-5p
Organismal Systems	Nervous system	GABAergic synapse	ko04727	2	127	0.580181	0.774899	ENSMUSG00000027669:mmu-miR-466i-5p,ENSMUSG00000000001:mmu-miR-451a
Environmental Information Processing	Membrane transport	ABC transporters	ko02010	1	59	0.59718	0.786825	ENSMUSG00000030249:mmu-miR-466i-5p
Metabolism	Lipid metabolism	Glycerophospholipid metabolism	ko00564	2	131	0.597073	0.786825	ENSMUSG00000058793:mmu-miR-466i-5p,ENSMUSG00000022861:mmu-miR-466i-5p
Genetic Information Processing	Replication and repair	Homologous recombination	ko03440	1	63	0.62129	0.813098	ENSMUSG00000021287:mmu-miR-466i-5p
Environmental Information Processing	Signal transduction	Hippo signaling pathway	ko04390	10	698	0.625867	0.813627	ENSMUSG00000020135:mmu-let-7i-5p,ENSMUSG00000022346:mmu-miR-451a,ENSMUSG00000009073:mmu-let-7i-5p,ENSMUSG00000049791:mmu-miR-19a-3p,ENSMUSG00000002603:mmu-miR-130b-3p,ENSMUSG00000014956:mmu-miR-574-5p,ENSMUSG00000037643:mmu-miR-466i-5p,ENSMUSG00000022676:mmu-miR-466i-5p,ENSMUSG00000022285:mmu-miR-451a,ENSMUSG00000039239:mmu-miR-466i-5p
Organismal Systems	Endocrine system	Oxytocin signaling pathway	ko04921	9	641	0.647517	0.836198	ENSMUSG00000044951:mmu-miR-466i-5p,ENSMUSG00000044951:mmu-miR-574-5p,ENSMUSG00000033016:mmu-miR-466i-5p,ENSMUSG00000010066:mmu-miR-466i-5p,ENSMUSG00000051177:mmu-miR-466i-5p,ENSMUSG00000049112:mmu-miR-466i-5p,ENSMUSG00000014956:mmu-miR-574-5p,ENSMUSG00000000001:mmu-miR-451a,ENSMUSG00000050697:mmu-miR-451a,ENSMUSG00000039145:mmu-miR-466i-5p
Cellular Processes	Cell growth and death	Oocyte meiosis	ko04114	3	223	0.664768	0.84889	ENSMUSG00000005533:mmu-miR-466i-5p,ENSMUSG00000014956:mmu-miR-574-5p,ENSMUSG00000022285:mmu-miR-451a
Metabolism	Carbohydrate metabolism	Amino sugar and nucleotide sugar metabolism	ko00520	1	72	0.670406	0.84889	ENSMUSG00000029992:mmu-miR-466i-5p
Organismal Systems	Immune system	Intestinal immune network for IgA production	ko04672	4	297	0.667346	0.84889	ENSMUSG00000002603:mmu-miR-130b-3p,ENSMUSG00000026012:mmu-miR-466i-5p,ENSMUSG00000068105:mmu-miR-466i-5p,ENSMUSG00000025746:mmu-let-7i-5p
Cellular Processes	Cell growth and death	Apoptosis	ko04210	9	663	0.686229	0.86332	ENSMUSG00000025860:mmu-miR-451a,ENSMUSG00000021939:mmu-miR-574-5p,ENSMUSG00000020901:mmu-miR-466i-5p,ENSMUSG00000057329:mmu-miR-466i-5p,ENSMUSG00000027381:mmu-miR-466i-5p,ENSMUSG00000057446:mmu-let-7i-5p,ENSMUSG00000024401:mmu-miR-19a-3p,ENSMUSG00000019699:mmu-miR-451a,ENSMUSG00000026029:mmu-miR-466i-5p
Cellular Processes	Cellular community - eukaryotes	Gap junction	ko04540	2	167	0.726392	0.90333	ENSMUSG00000000001:mmu-miR-451a,ENSMUSG00000051177:mmu-miR-466i-5p
Environmental Information Processing	Signal transduction	Rap1 signaling pathway	ko04015	10	763	0.731929	0.90333	ENSMUSG00000037643:mmu-miR-466i-5p,ENSMUSG00000000120:mmu-miR-466i-5p,ENSMUSG00000020901:mmu-miR-466i-5p,ENSMUSG00000005534:mmu-miR-466i-5p,ENSMUSG00000000001:mmu-miR-451a,ENSMUSG00000019699:mmu-miR-451a,ENSMUSG00000051177:mmu-miR-466i-5p,ENSMUSG00000053137:mmu-miR-466i-5p,ENSMUSG00000002699:mmu-miR-466i-5p,ENSMUSG00000005533:mmu-miR-466i-5p
Metabolism	Carbohydrate metabolism	Pentose and glucuronate interconversions	ko00040	1	85	0.730348	0.90333	ENSMUSG00000011382:mmu-miR-466i-5p,ENSMUSG00000011382:mmu-miR-574-5p
Metabolism	Lipid metabolism	Glycerolipid metabolism	ko00561	1	89	0.746503	0.915523	ENSMUSG00000022861:mmu-miR-466i-5p
Metabolism	Amino acid metabolism	Glycine, serine and threonine metabolism	ko00260	1	91	0.754216	0.9192	ENSMUSG00000025037:mmu-miR-574-5p
Organismal Systems	Immune system	Natural killer cell mediated cytotoxicity	ko04650	5	416	0.76402	0.925365	ENSMUSG00000020901:mmu-miR-466i-5p,ENSMUSG00000024401:mmu-miR-19a-3p,ENSMUSG00000002699:mmu-miR-466i-5p,ENSMUSG00000033016:mmu-miR-466i-5p,ENSMUSG00000022967:mmu-let-7i-5p
Environmental Information Processing	Signal transduction	Notch signaling pathway	ko04330	1	97	0.775976	0.934045	ENSMUSG00000068859:mmu-miR-466i-5p
Environmental Information Processing	Signal transduction	MAPK signaling pathway - yeast	ko04011	2	190	0.789234	0.944176	ENSMUSG00000053137:mmu-miR-466i-5p,ENSMUSG00000002603:mmu-miR-130b-3p
Metabolism	Energy metabolism	Methane metabolism	ko00680	1	103	0.795814	0.946242	ENSMUSG00000027452:mmu-miR-466i-5p
Cellular Processes	Cell growth and death	Ferroptosis	ko04216	1	114	0.827743	0.9557	ENSMUSG00000022094:mmu-miR-466i-5p
Cellular Processes	Transport and catabolism	Peroxisome	ko04146	1	118	0.838075	0.9557	ENSMUSG00000022853:mmu-miR-466i-5p
Genetic Information Processing	Translation	mRNA surveillance pathway	ko03015	2	202	0.816699	0.9557	ENSMUSG00000014956:mmu-miR-574-5p,ENSMUSG00000069769:mmu-let-7i-5p
Metabolism	Xenobiotics biodegradation and metabolism	Drug metabolism - cytochrome P450	ko00982	1	116	0.832989	0.9557	ENSMUSG00000025037:mmu-miR-574-5p
Organismal Systems	Immune system	B cell receptor signaling pathway	ko04662	3	299	0.837612	0.9557	ENSMUSG00000020901:mmu-miR-466i-5p,ENSMUSG00000019699:mmu-miR-451a,ENSMUSG00000033016:mmu-miR-466i-5p
Organismal Systems	Immune system	Complement and coagulation cascades	ko04610	1	114	0.827743	0.9557	ENSMUSG00000074743:mmu-miR-451a
Organismal Systems	Immune system	Fc gamma R-mediated phagocytosis	ko04666	4	364	0.809212	0.9557	ENSMUSG00000019699:mmu-miR-451a,ENSMUSG00000036995:mmu-miR-466i-5p,ENSMUSG00000021948:mmu-miR-466i-5p,ENSMUSG00000020901:mmu-miR-466i-5p
Cellular Processes	Cell growth and death	Meiosis - yeast	ko04113	1	122	0.847789	0.961156	ENSMUSG00000014956:mmu-miR-574-5p
Cellular Processes	Cell motility	Regulation of actin cytoskeleton	ko04810	8	722	0.864266	0.974173	ENSMUSG00000020611:mmu-miR-466i-5p,ENSMUSG00000032243:mmu-miR-466i-5p,ENSMUSG00000014956:mmu-miR-574-5p,ENSMUSG00000020901:mmu-miR-466i-5p,ENSMUSG00000044951:mmu-miR-466i-5p,ENSMUSG00000044951:mmu-miR-574-5p,ENSMUSG00000039115:mmu-miR-466i-5p,ENSMUSG00000021676:mmu-miR-466i-5p,ENSMUSG00000020135:mmu-let-7i-5p
Metabolism	Xenobiotics biodegradation and metabolism	Metabolism of xenobiotics by cytochrome P450	ko00980	1	132	0.869605	0.974557	ENSMUSG00000011382:mmu-miR-466i-5p,ENSMUSG00000011382:mmu-miR-574-5p
Environmental Information Processing	Signal transduction	Hippo signaling pathway -fly	ko04391	6	591	0.890609	0.986754	ENSMUSG00000009073:mmu-let-7i-5p,ENSMUSG00000022346:mmu-miR-451a,ENSMUSG00000027339:mmu-miR-466i-5p,ENSMUSG00000022285:mmu-miR-451a,ENSMUSG00000033306:mmu-miR-466i-5p,ENSMUSG00000037643:mmu-miR-466i-5p
Genetic Information Processing	Folding, sorting and degradation	Protein processing in endoplasmic reticulum	ko04141	3	333	0.885948	0.986754	ENSMUSG00000037306:mmu-miR-466i-5p,ENSMUSG00000021427:mmu-miR-466i-5p,ENSMUSG00000057329:mmu-miR-466i-5p
Cellular Processes	Cellular community - eukaryotes	Adherens junction	ko04520	5	522	0.902951	0.994777	ENSMUSG00000028284:mmu-miR-466i-5p,ENSMUSG00000022676:mmu-miR-466i-5p,ENSMUSG00000020154:mmu-miR-466i-5p,ENSMUSG00000005534:mmu-miR-466i-5p,ENSMUSG00000005533:mmu-miR-466i-5p
Genetic Information Processing	Folding, sorting and degradation	Ubiquitin mediated proteolysis	ko04120	6	621	0.91508	0.996875	ENSMUSG00000002603:mmu-miR-130b-3p,ENSMUSG00000024589:mmu-miR-466i-5p,ENSMUSG00000020184:mmu-miR-466i-5p,ENSMUSG00000036782:mmu-miR-466i-5p,ENSMUSG00000025860:mmu-miR-451a,ENSMUSG00000019944:mmu-miR-466i-5p
Genetic Information Processing	Translation	Ribosome biogenesis in eukaryotes	ko03008	1	159	0.914152	0.996875	ENSMUSG00000025266:mmu-let-7i-5p
Cellular Processes	Cell growth and death	Necroptosis	ko04217	5	629	0.965023	1	ENSMUSG00000024401:mmu-miR-19a-3p,ENSMUSG00000025860:mmu-miR-451a,ENSMUSG00000026029:mmu-miR-466i-5p,ENSMUSG00000057329:mmu-miR-466i-5p,ENSMUSG00000022967:mmu-let-7i-5p
Cellular Processes	Cellular community - eukaryotes	Tight junction	ko04530	7	833	0.972371	1	ENSMUSG00000024589:mmu-miR-466i-5p,ENSMUSG00000002603:mmu-miR-130b-3p,ENSMUSG00000037643:mmu-miR-466i-5p,ENSMUSG00000050697:mmu-miR-451a,ENSMUSG00000009073:mmu-let-7i-5p,ENSMUSG00000022952:mmu-miR-466i-5p,ENSMUSG00000028076:mmu-miR-466i-5p
Cellular Processes	Transport and catabolism	Phagosome	ko04145	2	948	0.999994	1	ENSMUSG00000079293:mmu-miR-466i-5p,ENSMUSG00000057446:mmu-let-7i-5p
Environmental Information Processing	Signal transduction	HIF-1 signaling pathway	ko04066	6	721	0.965636	1	ENSMUSG00000057329:mmu-miR-466i-5p,ENSMUSG00000019699:mmu-miR-451a,ENSMUSG00000005534:mmu-miR-466i-5p,ENSMUSG00000005533:mmu-miR-466i-5p,ENSMUSG00000020901:mmu-miR-466i-5p,ENSMUSG00000025746:mmu-let-7i-5p
Genetic Information Processing	Folding, sorting and degradation	RNA degradation	ko03018	1	185	0.942623	1	ENSMUSG00000032097:mmu-miR-466i-5p
Genetic Information Processing	Translation	RNA transport	ko03013	2	463	0.993743	1	ENSMUSG00000053293:mmu-miR-451a,ENSMUSG00000001855:mmu-let-7i-5p
Metabolism	Carbohydrate metabolism	Glycolysis / Gluconeogenesis	ko00010	1	608	0.999923	1	ENSMUSG00000027452:mmu-miR-466i-5p
Metabolism	Energy metabolism	Oxidative phosphorylation	ko00190	1	417	0.998453	1	ENSMUSG00000040018:mmu-miR-466i-5p
Metabolism	Nucleotide metabolism	Purine metabolism	ko00230	1	311	0.991906	1	ENSMUSG00000048120:mmu-miR-466i-5p
Metabolism	Nucleotide metabolism	Pyrimidine metabolism	ko00240	1	182	0.939891	1	ENSMUSG00000048120:mmu-miR-466i-5p
Metabolism	Overview	Carbon metabolism	ko01200	3	685	0.998373	1	ENSMUSG00000022853:mmu-miR-466i-5p,ENSMUSG00000062908:mmu-miR-19a-3p,ENSMUSG00000027452:mmu-miR-466i-5p
Organismal Systems	Circulatory system	Cardiac muscle contraction	ko04260	1	172	0.929813	1	ENSMUSG00000010066:mmu-miR-466i-5p
Organismal Systems	Endocrine system	Thyroid hormone signaling pathway	ko04919	5	572	0.938949	1	ENSMUSG00000019699:mmu-miR-451a,ENSMUSG00000051177:mmu-miR-466i-5p,ENSMUSG00000020184:mmu-miR-466i-5p,ENSMUSG00000022346:mmu-miR-451a,ENSMUSG00000020901:mmu-miR-466i-5p
Organismal Systems	Immune system	Leukocyte transendothelial migration	ko04670	3	573	0.99315	1	ENSMUSG00000020901:mmu-miR-466i-5p,ENSMUSG00000053137:mmu-miR-466i-5p,ENSMUSG00000000001:mmu-miR-451a
Organismal Systems	Sensory system	Olfactory transduction	ko04740	4	1498	1	1	ENSMUSG00000054640:mmu-miR-466i-5p,ENSMUSG00000079055:mmu-miR-466i-5p,ENSMUSG00000042249:mmu-miR-466i-5p,ENSMUSG00000024524:mmu-miR-466i-5p
Organismal Systems	Sensory system	Phototransduction - fly	ko04745	2	442	0.991658	1	ENSMUSG00000051177:mmu-miR-466i-5p,ENSMUSG00000042249:mmu-miR-466i-5p

## Sheet: miR-19a-3p
Pathway Hierarchy1	Pathway Hierarchy2	KEGG Pathway	Pathway ID	Gene Number	Background number	P-Value	Q-Value	Gene IDs
Environmental Information Processing	Signal transduction	Sphingolipid signaling pathway	ko04071	12	177	1.9205e-05	0.00257816	ENSMUSG00000057329:mmu-miR-466i-5p,ENSMUSG00000028245:mmu-miR-451a,ENSMUSG00000020611:mmu-miR-466i-5p,ENSMUSG00000020901:mmu-miR-466i-5p,ENSMUSG00000000001:mmu-miR-451a,ENSMUSG00000024887:mmu-miR-466i-5p,ENSMUSG00000019699:mmu-miR-451a,ENSMUSG00000067586:mmu-miR-574-5p,ENSMUSG00000051177:mmu-miR-466i-5p,ENSMUSG00000013663:mmu-miR-19a-3p,ENSMUSG00000013663:mmu-miR-19a-3p,ENSMUSG00000024401:mmu-miR…
Organismal Systems	Immune system	Toll-like receptor signaling pathway	ko04620	10	127	2.64426e-05	0.00257816	ENSMUSG00000026029:mmu-miR-466i-5p,ENSMUSG00000022967:mmu-let-7i-5p,ENSMUSG00000019699:mmu-miR-451a,ENSMUSG00000024401:mmu-miR-19a-3p,ENSMUSG00000053137:mmu-miR-466i-5p,ENSMUSG00000025746:mmu-let-7i-5p,ENSMUSG00000016024:mmu-miR-466i-5p,ENSMUSG00000025779:mmu-miR-466i-5p,ENSMUSG00000028284:mmu-miR-466i-5p,ENSMUSG00000020901:mmu-miR-466i-5p
Environmental Information Processing	Signal transduction	FoxO signaling pathway	ko04068	12	197	5.4972e-05	0.00281702	ENSMUSG00000027381:mmu-miR-466i-5p,ENSMUSG00000005533:mmu-miR-466i-5p,ENSMUSG00000013663:mmu-miR-19a-3p,ENSMUSG00000013663:mmu-miR-19a-3p,ENSMUSG00000053137:mmu-miR-466i-5p,ENSMUSG00000025746:mmu-let-7i-5p,ENSMUSG00000002603:mmu-miR-130b-3p,ENSMUSG00000019699:mmu-miR-451a,ENSMUSG00000005534:mmu-miR-466i-5p,ENSMUSG00000050697:mmu-miR-451a,ENSMUSG00000020901:mmu-miR-466i-5p,ENSMUSG00000020184:mmu-m…
Organismal Systems	Development	Osteoclast differentiation	ko04380	11	170	6.5002e-05	0.00281702	ENSMUSG00000053137:mmu-miR-466i-5p,ENSMUSG00000024401:mmu-miR-19a-3p,ENSMUSG00000002699:mmu-miR-466i-5p,ENSMUSG00000023964:mmu-miR-466i-5p,ENSMUSG00000002603:mmu-miR-130b-3p,ENSMUSG00000033016:mmu-miR-466i-5p,ENSMUSG00000022967:mmu-let-7i-5p,ENSMUSG00000019699:mmu-miR-451a,ENSMUSG00000020901:mmu-miR-466i-5p,ENSMUSG00000028284:mmu-miR-466i-5p,ENSMUSG00000039239:mmu-miR-466i-5p
Environmental Information Processing	Signaling molecules and interaction	Neuroactive ligand-receptor interaction	ko04080	16	397	0.000446782	0.00909691	ENSMUSG00000071489:mmu-miR-466i-5p,ENSMUSG00000030043:mmu-miR-466i-5p,ENSMUSG00000041078:mmu-miR-466i-5p,ENSMUSG00000001986:mmu-miR-466i-5p,ENSMUSG00000001986:mmu-miR-574-5p,ENSMUSG00000023964:mmu-miR-466i-5p,ENSMUSG00000044338:mmu-miR-466i-5p,ENSMUSG00000049112:mmu-miR-466i-5p,ENSMUSG00000000766:mmu-miR-466i-5p,ENSMUSG00000020081:mmu-miR-466i-5p,ENSMUSG00000050541:mmu-miR-466i-5p,ENSMUSG00000035…
Organismal Systems	Immune system	NOD-like receptor signaling pathway	ko04621	13	284	0.000466508	0.00909691	ENSMUSG00000022967:mmu-let-7i-5p,ENSMUSG00000066800:mmu-miR-466i-5p,ENSMUSG00000066800:mmu-miR-574-5p,ENSMUSG00000051177:mmu-miR-466i-5p,ENSMUSG00000026029:mmu-miR-466i-5p,ENSMUSG00000025746:mmu-let-7i-5p,ENSMUSG00000024401:mmu-miR-19a-3p,ENSMUSG00000053137:mmu-miR-466i-5p,ENSMUSG00000057329:mmu-miR-466i-5p,ENSMUSG00000028284:mmu-miR-466i-5p,ENSMUSG00000021948:mmu-miR-466i-5p,ENSMUSG00000025860:m…
Environmental Information Processing	Signal transduction	TNF signaling pathway	ko04668	9	142	0.000346618	0.00909691	ENSMUSG00000020901:mmu-miR-466i-5p,ENSMUSG00000028284:mmu-miR-466i-5p,ENSMUSG00000026070:mmu-miR-466i-5p,ENSMUSG00000027104:mmu-miR-451a,ENSMUSG00000053137:mmu-miR-466i-5p,ENSMUSG00000024401:mmu-miR-19a-3p,ENSMUSG00000025746:mmu-let-7i-5p,ENSMUSG00000026029:mmu-miR-466i-5p,ENSMUSG00000019699:mmu-miR-451a
Cellular Processes	Cellular community - eukaryotes	Signaling pathways regulating pluripotency of stem cells	ko04550	10	191	0.000750012	0.0121877	ENSMUSG00000020901:mmu-miR-466i-5p,ENSMUSG00000022346:mmu-miR-451a,ENSMUSG00000020135:mmu-let-7i-5p,ENSMUSG00000005533:mmu-miR-466i-5p,ENSMUSG00000053137:mmu-miR-466i-5p,ENSMUSG00000049791:mmu-miR-19a-3p,ENSMUSG00000019699:mmu-miR-451a,ENSMUSG00000038872:mmu-miR-466i-5p,ENSMUSG00000054263:mmu-miR-466i-5p,ENSMUSG00000038518:mmu-miR-466i-5p
Metabolism	Overview	Fatty acid metabolism	ko01212	6	74	0.000945027	0.0141754	ENSMUSG00000020532:mmu-miR-451a,ENSMUSG00000025202:mmu-miR-466i-5p,ENSMUSG00000022853:mmu-miR-466i-5p,ENSMUSG00000021786:mmu-miR-466i-5p,ENSMUSG00000062908:mmu-miR-19a-3p,ENSMUSG00000041220:mmu-miR-466i-5p
Organismal Systems	Immune system	RIG-I-like receptor signaling pathway	ko04622	6	88	0.0023135	0.0281958	ENSMUSG00000024401:mmu-miR-19a-3p,ENSMUSG00000053137:mmu-miR-466i-5p,ENSMUSG00000037523:mmu-miR-466i-5p,ENSMUSG00000026029:mmu-miR-466i-5p,ENSMUSG00000027854:mmu-miR-466i-5p,ENSMUSG00000028284:mmu-miR-466i-5p
Organismal Systems	Nervous system	Cholinergic synapse	ko04725	8	158	0.00305164	0.0330595	ENSMUSG00000027669:mmu-miR-466i-5p,ENSMUSG00000030525:mmu-miR-130b-3p,ENSMUSG00000030525:mmu-miR-19a-3p,ENSMUSG00000051177:mmu-miR-466i-5p,ENSMUSG00000019699:mmu-miR-451a,ENSMUSG00000020901:mmu-miR-466i-5p,ENSMUSG00000000001:mmu-miR-451a,ENSMUSG00000057329:mmu-miR-466i-5p,ENSMUSG00000035200:mmu-miR-466i-5p
Environmental Information Processing	Signal transduction	MAPK signaling pathway	ko04010	13	364	0.00422525	0.0433644	ENSMUSG00000023050:mmu-miR-130b-3p,ENSMUSG00000023050:mmu-miR-19a-3p,ENSMUSG00000032413:mmu-miR-466i-5p,ENSMUSG00000028284:mmu-miR-466i-5p,ENSMUSG00000039239:mmu-miR-466i-5p,ENSMUSG00000025278:mmu-miR-466i-5p,ENSMUSG00000027104:mmu-miR-451a,ENSMUSG00000024401:mmu-miR-19a-3p,ENSMUSG00000053137:mmu-miR-466i-5p,ENSMUSG00000022346:mmu-miR-451a,ENSMUSG00000010066:mmu-miR-466i-5p,ENSMUSG00000033016:mmu…
Environmental Information Processing	Signal transduction	Wnt signaling pathway	ko04310	9	214	0.00585688	0.0543853	ENSMUSG00000028284:mmu-miR-466i-5p,ENSMUSG00000030201:mmu-miR-19a-3p,ENSMUSG00000031548:mmu-miR-466i-5p,ENSMUSG00000033016:mmu-miR-466i-5p,ENSMUSG00000051177:mmu-miR-466i-5p,ENSMUSG00000049791:mmu-miR-19a-3p,ENSMUSG00000022346:mmu-miR-451a,ENSMUSG00000020135:mmu-let-7i-5p,ENSMUSG00000038192:mmu-miR-466i-5p
Organismal Systems	Immune system	T cell receptor signaling pathway	ko04660	9	223	0.00759242	0.0672965	ENSMUSG00000026012:mmu-miR-466i-5p,ENSMUSG00000019699:mmu-miR-451a,ENSMUSG00000033016:mmu-miR-466i-5p,ENSMUSG00000023274:mmu-miR-466i-5p,ENSMUSG00000024401:mmu-miR-19a-3p,ENSMUSG00000053137:mmu-miR-466i-5p,ENSMUSG00000002699:mmu-miR-466i-5p,ENSMUSG00000028284:mmu-miR-466i-5p,ENSMUSG00000020901:mmu-miR-466i-5p
Environmental Information Processing	Signaling molecules and interaction	Cytokine-cytokine receptor interaction	ko04060	11	318	0.0102119	0.0796526	ENSMUSG00000029375:mmu-miR-466i-5p,ENSMUSG00000039239:mmu-miR-466i-5p,ENSMUSG00000059326:mmu-miR-466i-5p,ENSMUSG00000026070:mmu-miR-466i-5p,ENSMUSG00000000120:mmu-miR-466i-5p,ENSMUSG00000054263:mmu-miR-466i-5p,ENSMUSG00000002603:mmu-miR-130b-3p,ENSMUSG00000022967:mmu-let-7i-5p,ENSMUSG00000024401:mmu-miR-19a-3p,ENSMUSG00000068105:mmu-miR-466i-5p,ENSMUSG00000025746:mmu-let-7i-5p
Environmental Information Processing	Signal transduction	Phosphatidylinositol signaling system	ko04070	6	131	0.0155143	0.112048	ENSMUSG00000051177:mmu-miR-466i-5p,ENSMUSG00000026925:mmu-miR-130b-3p,ENSMUSG00000022861:mmu-miR-466i-5p,ENSMUSG00000020901:mmu-miR-466i-5p,ENSMUSG00000013663:mmu-miR-19a-3p,ENSMUSG00000013663:mmu-miR-19a-3p,ENSMUSG00000058793:mmu-miR-466i-5p
Metabolism	Carbohydrate metabolism	Propanoate metabolism	ko00640	4	79	0.0329182	0.173488	ENSMUSG00000062908:mmu-miR-19a-3p,ENSMUSG00000027452:mmu-miR-466i-5p,ENSMUSG00000022853:mmu-miR-466i-5p,ENSMUSG00000020532:mmu-miR-451a
Cellular Processes	Transport and catabolism	Autophagy - animal	ko04140	10	346	0.0410208	0.199341	ENSMUSG00000050697:mmu-miR-451a,ENSMUSG00000021939:mmu-miR-574-5p,ENSMUSG00000020901:mmu-miR-466i-5p,ENSMUSG00000021948:mmu-miR-466i-5p,ENSMUSG00000028284:mmu-miR-466i-5p,ENSMUSG00000057329:mmu-miR-466i-5p,ENSMUSG00000057446:mmu-let-7i-5p,ENSMUSG00000005533:mmu-miR-466i-5p,ENSMUSG00000013663:mmu-miR-19a-3p,ENSMUSG00000013663:mmu-miR-19a-3p,ENSMUSG00000019699:mmu-miR-451a
Organismal Systems	Aging	Longevity regulating pathway - worm	ko04212	6	166	0.0426065	0.199341	ENSMUSG00000013663:mmu-miR-19a-3p,ENSMUSG00000013663:mmu-miR-19a-3p,ENSMUSG00000053137:mmu-miR-466i-5p,ENSMUSG00000005534:mmu-miR-466i-5p,ENSMUSG00000022285:mmu-miR-451a,ENSMUSG00000025202:mmu-miR-466i-5p,ENSMUSG00000019699:mmu-miR-451a
Environmental Information Processing	Signal transduction	mTOR signaling pathway	ko04150	10	359	0.050329	0.208812	ENSMUSG00000050697:mmu-miR-451a,ENSMUSG00000005534:mmu-miR-466i-5p,ENSMUSG00000036707:mmu-miR-451a,ENSMUSG00000020901:mmu-miR-466i-5p,ENSMUSG00000030201:mmu-miR-19a-3p,ENSMUSG00000005533:mmu-miR-466i-5p,ENSMUSG00000024401:mmu-miR-19a-3p,ENSMUSG00000013663:mmu-miR-19a-3p,ENSMUSG00000013663:mmu-miR-19a-3p,ENSMUSG00000019699:mmu-miR-451a,ENSMUSG00000049791:mmu-miR-19a-3p
Environmental Information Processing	Signal transduction	Calcium signaling pathway	ko04020	12	503	0.0867799	0.319285	ENSMUSG00000020081:mmu-miR-466i-5p,ENSMUSG00000050541:mmu-miR-466i-5p,ENSMUSG00000079055:mmu-miR-466i-5p,ENSMUSG00000030043:mmu-miR-466i-5p,ENSMUSG00000054640:mmu-miR-466i-5p,ENSMUSG00000030302:mmu-let-7i-5p,ENSMUSG00000031376:mmu-miR-466i-5p,ENSMUSG00000024524:mmu-miR-466i-5p,ENSMUSG00000030525:mmu-miR-130b-3p,ENSMUSG00000030525:mmu-miR-19a-3p,ENSMUSG00000049112:mmu-miR-466i-5p,ENSMUSG0000004495…
Organismal Systems	Endocrine system	Insulin secretion	ko04911	4	111	0.0906144	0.327219	ENSMUSG00000027273:mmu-miR-19a-3p,ENSMUSG00000027273:mmu-miR-466i-5p,ENSMUSG00000061601:mmu-miR-466i-5p,ENSMUSG00000027104:mmu-miR-451a,ENSMUSG00000051177:mmu-miR-466i-5p
Environmental Information Processing	Signal transduction	PI3K-Akt signaling pathway	ko04151	19	908	0.10469	0.344054	ENSMUSG00000022346:mmu-miR-451a,ENSMUSG00000013663:mmu-miR-19a-3p,ENSMUSG00000013663:mmu-miR-19a-3p,ENSMUSG00000027381:mmu-miR-466i-5p,ENSMUSG00000039115:mmu-miR-466i-5p,ENSMUSG00000022285:mmu-miR-451a,ENSMUSG00000020184:mmu-miR-466i-5p,ENSMUSG00000000120:mmu-miR-466i-5p,ENSMUSG00000005534:mmu-miR-466i-5p,ENSMUSG00000022967:mmu-let-7i-5p,ENSMUSG00000019699:mmu-miR-451a,ENSMUSG00000025746:mmu-let-…
Organismal Systems	Immune system	IL-17 signaling pathway	ko04657	5	170	0.119952	0.354403	ENSMUSG00000026029:mmu-miR-466i-5p,ENSMUSG00000028284:mmu-miR-466i-5p,ENSMUSG00000025746:mmu-let-7i-5p,ENSMUSG00000053137:mmu-miR-466i-5p,ENSMUSG00000024401:mmu-miR-19a-3p
Environmental Information Processing	Signal transduction	TGF-beta signaling pathway	ko04350	4	124	0.122395	0.356225	ENSMUSG00000024401:mmu-miR-19a-3p,ENSMUSG00000022346:mmu-miR-451a,ENSMUSG00000039239:mmu-miR-466i-5p,ENSMUSG00000002603:mmu-miR-130b-3p
Organismal Systems	Endocrine system	Adipocytokine signaling pathway	ko04920	3	84	0.137491	0.375684	ENSMUSG00000024401:mmu-miR-19a-3p,ENSMUSG00000050697:mmu-miR-451a,ENSMUSG00000019699:mmu-miR-451a
Metabolism	Metabolism of other amino acids	beta-Alanine metabolism	ko00410	2	53	0.194058	0.461479	ENSMUSG00000022853:mmu-miR-466i-5p,ENSMUSG00000062908:mmu-miR-19a-3p
Metabolism	Carbohydrate metabolism	Inositol phosphate metabolism	ko00562	3	104	0.212679	0.467936	ENSMUSG00000013663:mmu-miR-19a-3p,ENSMUSG00000013663:mmu-miR-19a-3p,ENSMUSG00000026925:mmu-miR-130b-3p,ENSMUSG00000051177:mmu-miR-466i-5p
Metabolism	Lipid metabolism	Fatty acid degradation	ko00071	2	69	0.284279	0.533957	ENSMUSG00000062908:mmu-miR-19a-3p,ENSMUSG00000022853:mmu-miR-466i-5p
Metabolism	Amino acid metabolism	Valine, leucine and isoleucine degradation	ko00280	2	70	0.28994	0.533957	ENSMUSG00000022853:mmu-miR-466i-5p,ENSMUSG00000062908:mmu-miR-19a-3p
Organismal Systems	Endocrine system	PPAR signaling pathway	ko03320	3	123	0.290253	0.533957	ENSMUSG00000062908:mmu-miR-19a-3p,ENSMUSG00000022853:mmu-miR-466i-5p,ENSMUSG00000025202:mmu-miR-466i-5p
Environmental Information Processing	Signal transduction	NF-kappa B signaling pathway	ko04064	7	372	0.34209	0.593999	ENSMUSG00000068105:mmu-miR-466i-5p,ENSMUSG00000024401:mmu-miR-19a-3p,ENSMUSG00000025860:mmu-miR-451a,ENSMUSG00000016024:mmu-miR-466i-5p,ENSMUSG00000025779:mmu-miR-466i-5p,ENSMUSG00000028284:mmu-miR-466i-5p,ENSMUSG00000057329:mmu-miR-466i-5p
Organismal Systems	Immune system	Hematopoietic cell lineage	ko04640	6	314	0.347896	0.593999	ENSMUSG00000004609:mmu-miR-466i-5p,ENSMUSG00000025746:mmu-let-7i-5p,ENSMUSG00000028076:mmu-miR-466i-5p,ENSMUSG00000024401:mmu-miR-19a-3p,ENSMUSG00000059326:mmu-miR-466i-5p,ENSMUSG00000023274:mmu-miR-466i-5p
Organismal Systems	Endocrine system	Melanogenesis	ko04916	3	139	0.357004	0.595007	ENSMUSG00000049791:mmu-miR-19a-3p,ENSMUSG00000051177:mmu-miR-466i-5p,ENSMUSG00000000001:mmu-miR-451a
Cellular Processes	Cellular community - eukaryotes	Focal adhesion	ko04510	12	691	0.366697	0.605983	ENSMUSG00000044951:mmu-miR-466i-5p,ENSMUSG00000044951:mmu-miR-574-5p,ENSMUSG00000019699:mmu-miR-451a,ENSMUSG00000039115:mmu-miR-466i-5p,ENSMUSG00000005533:mmu-miR-466i-5p,ENSMUSG00000013663:mmu-miR-19a-3p,ENSMUSG00000013663:mmu-miR-19a-3p,ENSMUSG00000025278:mmu-miR-466i-5p,ENSMUSG00000057329:mmu-miR-466i-5p,ENSMUSG00000032243:mmu-miR-466i-5p,ENSMUSG00000029661:mmu-let-7i-5p,ENSMUSG00000014956:mmu…
Cellular Processes	Cell growth and death	p53 signaling pathway	ko04115	4	206	0.385998	0.622	ENSMUSG00000026029:mmu-miR-466i-5p,ENSMUSG00000027663:mmu-miR-423-5p,ENSMUSG00000013663:mmu-miR-19a-3p,ENSMUSG00000013663:mmu-miR-19a-3p,ENSMUSG00000020184:mmu-miR-466i-5p
Organismal Systems	Nervous system	Synaptic vesicle cycle	ko04721	2	90	0.400671	0.63521	ENSMUSG00000027273:mmu-miR-19a-3p,ENSMUSG00000027273:mmu-miR-466i-5p,ENSMUSG00000028456:mmu-miR-466i-5p
Organismal Systems	Immune system	Fc epsilon RI signaling pathway	ko04664	5	294	0.467452	0.686578	ENSMUSG00000019699:mmu-miR-451a,ENSMUSG00000002699:mmu-miR-466i-5p,ENSMUSG00000024401:mmu-miR-19a-3p,ENSMUSG00000020901:mmu-miR-466i-5p,ENSMUSG00000053137:mmu-miR-466i-5p
Organismal Systems	Immune system	Antigen processing and presentation	ko04612	4	264	0.575483	0.773925	ENSMUSG00000023274:mmu-miR-466i-5p,ENSMUSG00000024401:mmu-miR-19a-3p,ENSMUSG00000057446:mmu-let-7i-5p,ENSMUSG00000021939:mmu-miR-574-5p
Environmental Information Processing	Signal transduction	Hippo signaling pathway	ko04390	10	698	0.625867	0.813627	ENSMUSG00000020135:mmu-let-7i-5p,ENSMUSG00000022346:mmu-miR-451a,ENSMUSG00000009073:mmu-let-7i-5p,ENSMUSG00000049791:mmu-miR-19a-3p,ENSMUSG00000002603:mmu-miR-130b-3p,ENSMUSG00000014956:mmu-miR-574-5p,ENSMUSG00000037643:mmu-miR-466i-5p,ENSMUSG00000022676:mmu-miR-466i-5p,ENSMUSG00000022285:mmu-miR-451a,ENSMUSG00000039239:mmu-miR-466i-5p
Cellular Processes	Cell growth and death	Apoptosis	ko04210	9	663	0.686229	0.86332	ENSMUSG00000025860:mmu-miR-451a,ENSMUSG00000021939:mmu-miR-574-5p,ENSMUSG00000020901:mmu-miR-466i-5p,ENSMUSG00000057329:mmu-miR-466i-5p,ENSMUSG00000027381:mmu-miR-466i-5p,ENSMUSG00000057446:mmu-let-7i-5p,ENSMUSG00000024401:mmu-miR-19a-3p,ENSMUSG00000019699:mmu-miR-451a,ENSMUSG00000026029:mmu-miR-466i-5p
Organismal Systems	Immune system	Natural killer cell mediated cytotoxicity	ko04650	5	416	0.76402	0.925365	ENSMUSG00000020901:mmu-miR-466i-5p,ENSMUSG00000024401:mmu-miR-19a-3p,ENSMUSG00000002699:mmu-miR-466i-5p,ENSMUSG00000033016:mmu-miR-466i-5p,ENSMUSG00000022967:mmu-let-7i-5p
Metabolism	Overview	Carbon metabolism	ko01200	3	685	0.998373	1	ENSMUSG00000022853:mmu-miR-466i-5p,ENSMUSG00000062908:mmu-miR-19a-3p,ENSMUSG00000027452:mmu-miR-466i-5p
Cellular Processes	Cell growth and death	Necroptosis	ko04217	5	629	0.965023	1	ENSMUSG00000024401:mmu-miR-19a-3p,ENSMUSG00000025860:mmu-miR-451a,ENSMUSG00000026029:mmu-miR-466i-5p,ENSMUSG00000057329:mmu-miR-466i-5p,ENSMUSG00000022967:mmu-let-7i-5p

## Sheet: miR-451a
Pathway Hierarchy1	Pathway Hierarchy2	KEGG Pathway	Pathway ID	Gene Number	Background number	P-Value	Q-Value	Gene IDs
Environmental Information Processing	Signal transduction	Sphingolipid signaling pathway	ko04071	12	177	1.9205e-05	0.00257816	ENSMUSG00000057329:mmu-miR-466i-5p,ENSMUSG00000028245:mmu-miR-451a,ENSMUSG00000020611:mmu-miR-466i-5p,ENSMUSG00000020901:mmu-miR-466i-5p,ENSMUSG00000000001:mmu-miR-451a,ENSMUSG00000024887:mmu-miR-466i-5p,ENSMUSG00000019699:mmu-miR-451a,ENSMUSG00000067586:mmu-miR-574-5p,ENSMUSG00000051177:mmu-miR-466i-5p,ENSMUSG00000013663:mmu-miR-19a-3p,ENSMUSG00000013663:mmu-miR-19a-3p,ENSMUSG00000024401:mmu-miR…
Organismal Systems	Immune system	Toll-like receptor signaling pathway	ko04620	10	127	2.64426e-05	0.00257816	ENSMUSG00000026029:mmu-miR-466i-5p,ENSMUSG00000022967:mmu-let-7i-5p,ENSMUSG00000019699:mmu-miR-451a,ENSMUSG00000024401:mmu-miR-19a-3p,ENSMUSG00000053137:mmu-miR-466i-5p,ENSMUSG00000025746:mmu-let-7i-5p,ENSMUSG00000016024:mmu-miR-466i-5p,ENSMUSG00000025779:mmu-miR-466i-5p,ENSMUSG00000028284:mmu-miR-466i-5p,ENSMUSG00000020901:mmu-miR-466i-5p
Environmental Information Processing	Signal transduction	cGMP - PKG signaling pathway	ko04022	14	268	7.22312e-05	0.00281702	ENSMUSG00000044951:mmu-miR-466i-5p,ENSMUSG00000044951:mmu-miR-574-5p,ENSMUSG00000051177:mmu-miR-466i-5p,ENSMUSG00000033016:mmu-miR-466i-5p,ENSMUSG00000019699:mmu-miR-451a,ENSMUSG00000030302:mmu-let-7i-5p,ENSMUSG00000020611:mmu-miR-466i-5p,ENSMUSG00000054640:mmu-miR-466i-5p,ENSMUSG00000031376:mmu-miR-466i-5p,ENSMUSG00000027104:mmu-miR-451a,ENSMUSG00000014956:mmu-miR-574-5p,ENSMUSG00000079055:mmu-m…
Environmental Information Processing	Signal transduction	FoxO signaling pathway	ko04068	12	197	5.4972e-05	0.00281702	ENSMUSG00000027381:mmu-miR-466i-5p,ENSMUSG00000005533:mmu-miR-466i-5p,ENSMUSG00000013663:mmu-miR-19a-3p,ENSMUSG00000013663:mmu-miR-19a-3p,ENSMUSG00000053137:mmu-miR-466i-5p,ENSMUSG00000025746:mmu-let-7i-5p,ENSMUSG00000002603:mmu-miR-130b-3p,ENSMUSG00000019699:mmu-miR-451a,ENSMUSG00000005534:mmu-miR-466i-5p,ENSMUSG00000050697:mmu-miR-451a,ENSMUSG00000020901:mmu-miR-466i-5p,ENSMUSG00000020184:mmu-m…
Organismal Systems	Development	Osteoclast differentiation	ko04380	11	170	6.5002e-05	0.00281702	ENSMUSG00000053137:mmu-miR-466i-5p,ENSMUSG00000024401:mmu-miR-19a-3p,ENSMUSG00000002699:mmu-miR-466i-5p,ENSMUSG00000023964:mmu-miR-466i-5p,ENSMUSG00000002603:mmu-miR-130b-3p,ENSMUSG00000033016:mmu-miR-466i-5p,ENSMUSG00000022967:mmu-let-7i-5p,ENSMUSG00000019699:mmu-miR-451a,ENSMUSG00000020901:mmu-miR-466i-5p,ENSMUSG00000028284:mmu-miR-466i-5p,ENSMUSG00000039239:mmu-miR-466i-5p
Organismal Systems	Development	Axon guidance	ko04360	13	248	0.000125543	0.00408016	ENSMUSG00000030257:mmu-miR-466i-5p,ENSMUSG00000020901:mmu-miR-466i-5p,ENSMUSG00000000001:mmu-miR-451a,ENSMUSG00000022231:mmu-miR-466i-5p,ENSMUSG00000027716:mmu-miR-451a,ENSMUSG00000019647:mmu-miR-466i-5p,ENSMUSG00000026235:mmu-miR-466i-5p,ENSMUSG00000063626:mmu-miR-466i-5p,ENSMUSG00000001761:mmu-miR-466i-5p,ENSMUSG00000028289:mmu-miR-466i-5p,ENSMUSG00000031391:mmu-miR-466i-5p,ENSMUSG00000041845:m…
Environmental Information Processing	Signaling molecules and interaction	Neuroactive ligand-receptor interaction	ko04080	16	397	0.000446782	0.00909691	ENSMUSG00000071489:mmu-miR-466i-5p,ENSMUSG00000030043:mmu-miR-466i-5p,ENSMUSG00000041078:mmu-miR-466i-5p,ENSMUSG00000001986:mmu-miR-466i-5p,ENSMUSG00000001986:mmu-miR-574-5p,ENSMUSG00000023964:mmu-miR-466i-5p,ENSMUSG00000044338:mmu-miR-466i-5p,ENSMUSG00000049112:mmu-miR-466i-5p,ENSMUSG00000000766:mmu-miR-466i-5p,ENSMUSG00000020081:mmu-miR-466i-5p,ENSMUSG00000050541:mmu-miR-466i-5p,ENSMUSG00000035…
Environmental Information Processing	Signal transduction	AMPK signaling pathway	ko04152	10	178	0.000433297	0.00909691	ENSMUSG00000036707:mmu-miR-451a,ENSMUSG00000020901:mmu-miR-466i-5p,ENSMUSG00000005534:mmu-miR-466i-5p,ENSMUSG00000050697:mmu-miR-451a,ENSMUSG00000027715:mmu-miR-466i-5p,ENSMUSG00000020532:mmu-miR-451a,ENSMUSG00000028284:mmu-miR-466i-5p,ENSMUSG00000005533:mmu-miR-466i-5p,ENSMUSG00000025202:mmu-miR-466i-5p,ENSMUSG00000019699:mmu-miR-451a
Organismal Systems	Immune system	NOD-like receptor signaling pathway	ko04621	13	284	0.000466508	0.00909691	ENSMUSG00000022967:mmu-let-7i-5p,ENSMUSG00000066800:mmu-miR-466i-5p,ENSMUSG00000066800:mmu-miR-574-5p,ENSMUSG00000051177:mmu-miR-466i-5p,ENSMUSG00000026029:mmu-miR-466i-5p,ENSMUSG00000025746:mmu-let-7i-5p,ENSMUSG00000024401:mmu-miR-19a-3p,ENSMUSG00000053137:mmu-miR-466i-5p,ENSMUSG00000057329:mmu-miR-466i-5p,ENSMUSG00000028284:mmu-miR-466i-5p,ENSMUSG00000021948:mmu-miR-466i-5p,ENSMUSG00000025860:m…
Environmental Information Processing	Signal transduction	TNF signaling pathway	ko04668	9	142	0.000346618	0.00909691	ENSMUSG00000020901:mmu-miR-466i-5p,ENSMUSG00000028284:mmu-miR-466i-5p,ENSMUSG00000026070:mmu-miR-466i-5p,ENSMUSG00000027104:mmu-miR-451a,ENSMUSG00000053137:mmu-miR-466i-5p,ENSMUSG00000024401:mmu-miR-19a-3p,ENSMUSG00000025746:mmu-let-7i-5p,ENSMUSG00000026029:mmu-miR-466i-5p,ENSMUSG00000019699:mmu-miR-451a
Organismal Systems	Circulatory system	Adrenergic signaling in cardiomyocytes	ko04261	11	221	0.000632113	0.0112056	ENSMUSG00000050541:mmu-miR-466i-5p,ENSMUSG00000000001:mmu-miR-451a,ENSMUSG00000027104:mmu-miR-451a,ENSMUSG00000014956:mmu-miR-574-5p,ENSMUSG00000057329:mmu-miR-466i-5p,ENSMUSG00000031376:mmu-miR-466i-5p,ENSMUSG00000030302:mmu-let-7i-5p,ENSMUSG00000053137:mmu-miR-466i-5p,ENSMUSG00000019699:mmu-miR-451a,ENSMUSG00000051177:mmu-miR-466i-5p,ENSMUSG00000010066:mmu-miR-466i-5p
Cellular Processes	Cellular community - eukaryotes	Signaling pathways regulating pluripotency of stem cells	ko04550	10	191	0.000750012	0.0121877	ENSMUSG00000020901:mmu-miR-466i-5p,ENSMUSG00000022346:mmu-miR-451a,ENSMUSG00000020135:mmu-let-7i-5p,ENSMUSG00000005533:mmu-miR-466i-5p,ENSMUSG00000053137:mmu-miR-466i-5p,ENSMUSG00000049791:mmu-miR-19a-3p,ENSMUSG00000019699:mmu-miR-451a,ENSMUSG00000038872:mmu-miR-466i-5p,ENSMUSG00000054263:mmu-miR-466i-5p,ENSMUSG00000038518:mmu-miR-466i-5p
Metabolism	Overview	Fatty acid metabolism	ko01212	6	74	0.000945027	0.0141754	ENSMUSG00000020532:mmu-miR-451a,ENSMUSG00000025202:mmu-miR-466i-5p,ENSMUSG00000022853:mmu-miR-466i-5p,ENSMUSG00000021786:mmu-miR-466i-5p,ENSMUSG00000062908:mmu-miR-19a-3p,ENSMUSG00000041220:mmu-miR-466i-5p
Organismal Systems	Nervous system	Glutamatergic synapse	ko04724	9	172	0.00136768	0.0177798	ENSMUSG00000027669:mmu-miR-466i-5p,ENSMUSG00000001986:mmu-miR-466i-5p,ENSMUSG00000001986:mmu-miR-574-5p,ENSMUSG00000051177:mmu-miR-466i-5p,ENSMUSG00000037541:mmu-miR-451a,ENSMUSG00000001985:mmu-miR-466i-5p,ENSMUSG00000039579:mmu-miR-451a,ENSMUSG00000000001:mmu-miR-451a,ENSMUSG00000042249:mmu-miR-466i-5p,ENSMUSG00000005089:mmu-miR-466i-5p
Organismal Systems	Nervous system	Dopaminergic synapse	ko04728	10	206	0.00133061	0.0177798	ENSMUSG00000027104:mmu-miR-451a,ENSMUSG00000014956:mmu-miR-574-5p,ENSMUSG00000000001:mmu-miR-451a,ENSMUSG00000051177:mmu-miR-466i-5p,ENSMUSG00000025037:mmu-miR-574-5p,ENSMUSG00000019699:mmu-miR-451a,ENSMUSG00000053137:mmu-miR-466i-5p,ENSMUSG00000001986:mmu-miR-466i-5p,ENSMUSG00000001986:mmu-miR-574-5p,ENSMUSG00000027669:mmu-miR-466i-5p,ENSMUSG00000024524:mmu-miR-466i-5p
Organismal Systems	Aging	Longevity regulating pathway - mammal	ko04211	7	120	0.00250093	0.0286871	ENSMUSG00000005534:mmu-miR-466i-5p,ENSMUSG00000050697:mmu-miR-451a,ENSMUSG00000005533:mmu-miR-466i-5p,ENSMUSG00000020901:mmu-miR-466i-5p,ENSMUSG00000040760:mmu-miR-466i-5p,ENSMUSG00000019699:mmu-miR-451a,ENSMUSG00000027104:mmu-miR-451a
Organismal Systems	Nervous system	Cholinergic synapse	ko04725	8	158	0.00305164	0.0330595	ENSMUSG00000027669:mmu-miR-466i-5p,ENSMUSG00000030525:mmu-miR-130b-3p,ENSMUSG00000030525:mmu-miR-19a-3p,ENSMUSG00000051177:mmu-miR-466i-5p,ENSMUSG00000019699:mmu-miR-451a,ENSMUSG00000020901:mmu-miR-466i-5p,ENSMUSG00000000001:mmu-miR-451a,ENSMUSG00000057329:mmu-miR-466i-5p,ENSMUSG00000035200:mmu-miR-466i-5p
Environmental Information Processing	Signal transduction	MAPK signaling pathway	ko04010	13	364	0.00422525	0.0433644	ENSMUSG00000023050:mmu-miR-130b-3p,ENSMUSG00000023050:mmu-miR-19a-3p,ENSMUSG00000032413:mmu-miR-466i-5p,ENSMUSG00000028284:mmu-miR-466i-5p,ENSMUSG00000039239:mmu-miR-466i-5p,ENSMUSG00000025278:mmu-miR-466i-5p,ENSMUSG00000027104:mmu-miR-451a,ENSMUSG00000024401:mmu-miR-19a-3p,ENSMUSG00000053137:mmu-miR-466i-5p,ENSMUSG00000022346:mmu-miR-451a,ENSMUSG00000010066:mmu-miR-466i-5p,ENSMUSG00000033016:mmu…
Cellular Processes	Cell growth and death	Apoptosis - multiple species	ko04215	5	72	0.00491203	0.0478923	ENSMUSG00000026029:mmu-miR-466i-5p,ENSMUSG00000057329:mmu-miR-466i-5p,ENSMUSG00000027381:mmu-miR-466i-5p,ENSMUSG00000000120:mmu-miR-466i-5p,ENSMUSG00000025860:mmu-miR-451a
Environmental Information Processing	Signal transduction	Wnt signaling pathway	ko04310	9	214	0.00585688	0.0543853	ENSMUSG00000028284:mmu-miR-466i-5p,ENSMUSG00000030201:mmu-miR-19a-3p,ENSMUSG00000031548:mmu-miR-466i-5p,ENSMUSG00000033016:mmu-miR-466i-5p,ENSMUSG00000051177:mmu-miR-466i-5p,ENSMUSG00000049791:mmu-miR-19a-3p,ENSMUSG00000022346:mmu-miR-451a,ENSMUSG00000020135:mmu-let-7i-5p,ENSMUSG00000038192:mmu-miR-466i-5p
Organismal Systems	Immune system	T cell receptor signaling pathway	ko04660	9	223	0.00759242	0.0672965	ENSMUSG00000026012:mmu-miR-466i-5p,ENSMUSG00000019699:mmu-miR-451a,ENSMUSG00000033016:mmu-miR-466i-5p,ENSMUSG00000023274:mmu-miR-466i-5p,ENSMUSG00000024401:mmu-miR-19a-3p,ENSMUSG00000053137:mmu-miR-466i-5p,ENSMUSG00000002699:mmu-miR-466i-5p,ENSMUSG00000028284:mmu-miR-466i-5p,ENSMUSG00000020901:mmu-miR-466i-5p
Environmental Information Processing	Signal transduction	cAMP signaling pathway	ko04024	10	279	0.0111185	0.0833889	ENSMUSG00000019699:mmu-miR-451a,ENSMUSG00000033016:mmu-miR-466i-5p,ENSMUSG00000039579:mmu-miR-451a,ENSMUSG00000001986:mmu-miR-466i-5p,ENSMUSG00000001986:mmu-miR-574-5p,ENSMUSG00000049112:mmu-miR-466i-5p,ENSMUSG00000014956:mmu-miR-574-5p,ENSMUSG00000030302:mmu-let-7i-5p,ENSMUSG00000031376:mmu-miR-466i-5p,ENSMUSG00000000001:mmu-miR-451a,ENSMUSG00000020901:mmu-miR-466i-5p
Environmental Information Processing	Signal transduction	Jak-STAT signaling pathway	ko04630	8	216	0.0184193	0.123854	ENSMUSG00000059326:mmu-miR-466i-5p,ENSMUSG00000057329:mmu-miR-466i-5p,ENSMUSG00000020901:mmu-miR-466i-5p,ENSMUSG00000022967:mmu-let-7i-5p,ENSMUSG00000019699:mmu-miR-451a,ENSMUSG00000054263:mmu-miR-466i-5p,ENSMUSG00000025746:mmu-let-7i-5p,ENSMUSG00000022346:mmu-miR-451a
Organismal Systems	Nervous system	Long-term depression	ko04730	5	99	0.0180276	0.123854	ENSMUSG00000005533:mmu-miR-466i-5p,ENSMUSG00000000001:mmu-miR-451a,ENSMUSG00000001986:mmu-miR-466i-5p,ENSMUSG00000001986:mmu-miR-574-5p,ENSMUSG00000020611:mmu-miR-466i-5p,ENSMUSG00000051177:mmu-miR-466i-5p
Organismal Systems	Digestive system	Gastric acid secretion	ko04971	5	101	0.0194838	0.126645	ENSMUSG00000041248:mmu-miR-466i-5p,ENSMUSG00000051497:mmu-miR-466i-5p,ENSMUSG00000000001:mmu-miR-451a,ENSMUSG00000051177:mmu-miR-466i-5p,ENSMUSG00000044951:mmu-miR-466i-5p,ENSMUSG00000044951:mmu-miR-574-5p
Environmental Information Processing	Signal transduction	MAPK signaling pathway - fly	ko04013	6	148	0.0264495	0.156293	ENSMUSG00000053137:mmu-miR-466i-5p,ENSMUSG00000019779:mmu-miR-466i-5p,ENSMUSG00000022285:mmu-miR-451a,ENSMUSG00000028284:mmu-miR-466i-5p,ENSMUSG00000025658:mmu-miR-466i-5p,ENSMUSG00000027104:mmu-miR-451a
Environmental Information Processing	Signal transduction	Apelin signaling pathway	ko04371	10	320	0.0260956	0.156293	ENSMUSG00000054640:mmu-miR-466i-5p,ENSMUSG00000020611:mmu-miR-466i-5p,ENSMUSG00000079055:mmu-miR-466i-5p,ENSMUSG00000000001:mmu-miR-451a,ENSMUSG00000050697:mmu-miR-451a,ENSMUSG00000044951:mmu-miR-466i-5p,ENSMUSG00000044951:mmu-miR-574-5p,ENSMUSG00000051177:mmu-miR-466i-5p,ENSMUSG00000019699:mmu-miR-451a,ENSMUSG00000044338:mmu-miR-466i-5p,ENSMUSG00000027669:mmu-miR-466i-5p
Organismal Systems	Endocrine system	Regulation of lipolysis in adipocyte	ko04923	4	75	0.0279053	0.160045	ENSMUSG00000019699:mmu-miR-451a,ENSMUSG00000020901:mmu-miR-466i-5p,ENSMUSG00000005534:mmu-miR-466i-5p,ENSMUSG00000000001:mmu-miR-451a
Metabolism	Lipid metabolism	Fatty acid biosynthesis	ko00061	2	18	0.0303062	0.164158	ENSMUSG00000020532:mmu-miR-451a,ENSMUSG00000021786:mmu-miR-466i-5p
Organismal Systems	Immune system	Toll and Imd signaling pathway	ko04624	5	113	0.0298407	0.164158	ENSMUSG00000053137:mmu-miR-466i-5p,ENSMUSG00000027104:mmu-miR-451a,ENSMUSG00000026029:mmu-miR-466i-5p,ENSMUSG00000032826:mmu-miR-466i-5p,ENSMUSG00000028284:mmu-miR-466i-5p
Metabolism	Carbohydrate metabolism	Propanoate metabolism	ko00640	4	79	0.0329182	0.173488	ENSMUSG00000062908:mmu-miR-19a-3p,ENSMUSG00000027452:mmu-miR-466i-5p,ENSMUSG00000022853:mmu-miR-466i-5p,ENSMUSG00000020532:mmu-miR-451a
Metabolism	Biosynthesis of other secondary metabolites	Aflatoxin biosynthesis	ko00254	1	3	0.0451332	0.199341	ENSMUSG00000020532:mmu-miR-451a
Organismal Systems	Immune system	Chemokine signaling pathway	ko04062	8	253	0.041391	0.199341	ENSMUSG00000042249:mmu-miR-466i-5p,ENSMUSG00000000001:mmu-miR-451a,ENSMUSG00000020901:mmu-miR-466i-5p,ENSMUSG00000021948:mmu-miR-466i-5p,ENSMUSG00000029375:mmu-miR-466i-5p,ENSMUSG00000027669:mmu-miR-466i-5p,ENSMUSG00000051177:mmu-miR-466i-5p,ENSMUSG00000019699:mmu-miR-451a
Cellular Processes	Transport and catabolism	Autophagy - animal	ko04140	10	346	0.0410208	0.199341	ENSMUSG00000050697:mmu-miR-451a,ENSMUSG00000021939:mmu-miR-574-5p,ENSMUSG00000020901:mmu-miR-466i-5p,ENSMUSG00000021948:mmu-miR-466i-5p,ENSMUSG00000028284:mmu-miR-466i-5p,ENSMUSG00000057329:mmu-miR-466i-5p,ENSMUSG00000057446:mmu-let-7i-5p,ENSMUSG00000005533:mmu-miR-466i-5p,ENSMUSG00000013663:mmu-miR-19a-3p,ENSMUSG00000013663:mmu-miR-19a-3p,ENSMUSG00000019699:mmu-miR-451a
Organismal Systems	Aging	Longevity regulating pathway - worm	ko04212	6	166	0.0426065	0.199341	ENSMUSG00000013663:mmu-miR-19a-3p,ENSMUSG00000013663:mmu-miR-19a-3p,ENSMUSG00000053137:mmu-miR-466i-5p,ENSMUSG00000005534:mmu-miR-466i-5p,ENSMUSG00000022285:mmu-miR-451a,ENSMUSG00000025202:mmu-miR-466i-5p,ENSMUSG00000019699:mmu-miR-451a
Organismal Systems	Aging	Longevity regulating pathway - multiple species	ko04213	5	123	0.0407035	0.199341	ENSMUSG00000020901:mmu-miR-466i-5p,ENSMUSG00000050697:mmu-miR-451a,ENSMUSG00000005533:mmu-miR-466i-5p,ENSMUSG00000005534:mmu-miR-466i-5p,ENSMUSG00000019699:mmu-miR-451a
Environmental Information Processing	Signal transduction	VEGF signaling pathway	ko04370	4	88	0.0460018	0.199341	ENSMUSG00000019699:mmu-miR-451a,ENSMUSG00000028071:mmu-miR-466i-5p,ENSMUSG00000053137:mmu-miR-466i-5p,ENSMUSG00000020901:mmu-miR-466i-5p
Organismal Systems	Endocrine system	Estrogen signaling pathway	ko04915	7	212	0.0449642	0.199341	ENSMUSG00000000766:mmu-miR-466i-5p,ENSMUSG00000000001:mmu-miR-451a,ENSMUSG00000020901:mmu-miR-466i-5p,ENSMUSG00000021948:mmu-miR-466i-5p,ENSMUSG00000051177:mmu-miR-466i-5p,ENSMUSG00000019699:mmu-miR-451a,ENSMUSG00000027104:mmu-miR-451a
Environmental Information Processing	Signal transduction	mTOR signaling pathway	ko04150	10	359	0.050329	0.208812	ENSMUSG00000050697:mmu-miR-451a,ENSMUSG00000005534:mmu-miR-466i-5p,ENSMUSG00000036707:mmu-miR-451a,ENSMUSG00000020901:mmu-miR-466i-5p,ENSMUSG00000030201:mmu-miR-19a-3p,ENSMUSG00000005533:mmu-miR-466i-5p,ENSMUSG00000024401:mmu-miR-19a-3p,ENSMUSG00000013663:mmu-miR-19a-3p,ENSMUSG00000013663:mmu-miR-19a-3p,ENSMUSG00000019699:mmu-miR-451a,ENSMUSG00000049791:mmu-miR-19a-3p
Organismal Systems	Nervous system	Neurotrophin signaling pathway	ko04722	6	181	0.0599772	0.238685	ENSMUSG00000057329:mmu-miR-466i-5p,ENSMUSG00000019699:mmu-miR-451a,ENSMUSG00000021948:mmu-miR-466i-5p,ENSMUSG00000020901:mmu-miR-466i-5p,ENSMUSG00000000120:mmu-miR-466i-5p,ENSMUSG00000053137:mmu-miR-466i-5p
Organismal Systems	Endocrine system	Progesterone-mediated oocyte maturation	ko04914	6	194	0.0779915	0.292468	ENSMUSG00000053137:mmu-miR-466i-5p,ENSMUSG00000020901:mmu-miR-466i-5p,ENSMUSG00000027715:mmu-miR-466i-5p,ENSMUSG00000005533:mmu-miR-466i-5p,ENSMUSG00000000001:mmu-miR-451a,ENSMUSG00000019699:mmu-miR-451a
Organismal Systems	Endocrine system	Insulin secretion	ko04911	4	111	0.0906144	0.327219	ENSMUSG00000027273:mmu-miR-19a-3p,ENSMUSG00000027273:mmu-miR-466i-5p,ENSMUSG00000061601:mmu-miR-466i-5p,ENSMUSG00000027104:mmu-miR-451a,ENSMUSG00000051177:mmu-miR-466i-5p
Environmental Information Processing	Signal transduction	PI3K-Akt signaling pathway	ko04151	19	908	0.10469	0.344054	ENSMUSG00000022346:mmu-miR-451a,ENSMUSG00000013663:mmu-miR-19a-3p,ENSMUSG00000013663:mmu-miR-19a-3p,ENSMUSG00000027381:mmu-miR-466i-5p,ENSMUSG00000039115:mmu-miR-466i-5p,ENSMUSG00000022285:mmu-miR-451a,ENSMUSG00000020184:mmu-miR-466i-5p,ENSMUSG00000000120:mmu-miR-466i-5p,ENSMUSG00000005534:mmu-miR-466i-5p,ENSMUSG00000022967:mmu-let-7i-5p,ENSMUSG00000019699:mmu-miR-451a,ENSMUSG00000025746:mmu-let-…
Organismal Systems	Environmental adaptation	Circadian rhythm	ko04710	2	37	0.109391	0.344054	ENSMUSG00000050697:mmu-miR-451a,ENSMUSG00000036192:mmu-miR-466i-5p
Organismal Systems	Endocrine system	Prolactin signaling pathway	ko04917	4	116	0.102319	0.344054	ENSMUSG00000019699:mmu-miR-451a,ENSMUSG00000020901:mmu-miR-466i-5p,ENSMUSG00000053137:mmu-miR-466i-5p,ENSMUSG00000018899:mmu-miR-130b-3p
Organismal Systems	Endocrine system	Aldosterone synthesis and secretion	ko04925	4	120	0.112156	0.34715	ENSMUSG00000039145:mmu-miR-466i-5p,ENSMUSG00000026826:mmu-miR-466i-5p,ENSMUSG00000051177:mmu-miR-466i-5p,ENSMUSG00000027104:mmu-miR-451a
Environmental Information Processing	Signal transduction	TGF-beta signaling pathway	ko04350	4	124	0.122395	0.356225	ENSMUSG00000024401:mmu-miR-19a-3p,ENSMUSG00000022346:mmu-miR-451a,ENSMUSG00000039239:mmu-miR-466i-5p,ENSMUSG00000002603:mmu-miR-130b-3p
Metabolism	Amino acid metabolism	Phenylalanine metabolism	ko00360	2	41	0.12956	0.371533	ENSMUSG00000033307:mmu-miR-451a,ENSMUSG00000025037:mmu-miR-574-5p
Cellular Processes	Cell growth and death	Cell cycle	ko04110	7	281	0.140641	0.375684	ENSMUSG00000027715:mmu-miR-466i-5p,ENSMUSG00000022346:mmu-miR-451a,ENSMUSG00000020184:mmu-miR-466i-5p,ENSMUSG00000039239:mmu-miR-466i-5p,ENSMUSG00000022285:mmu-miR-451a,ENSMUSG00000002603:mmu-miR-130b-3p,ENSMUSG00000069089:mmu-miR-466i-5p
Organismal Systems	Endocrine system	Adipocytokine signaling pathway	ko04920	3	84	0.137491	0.375684	ENSMUSG00000024401:mmu-miR-19a-3p,ENSMUSG00000050697:mmu-miR-451a,ENSMUSG00000019699:mmu-miR-451a
Cellular Processes	Transport and catabolism	Lysosome	ko04142	5	189	0.164088	0.421015	ENSMUSG00000000594:mmu-miR-451a,ENSMUSG00000057446:mmu-let-7i-5p,ENSMUSG00000021939:mmu-miR-574-5p,ENSMUSG00000007038:mmu-miR-466i-5p,ENSMUSG00000049624:mmu-miR-466i-5p
Organismal Systems	Endocrine system	Glucagon signaling pathway	ko04922	5	195	0.179215	0.447775	ENSMUSG00000019699:mmu-miR-451a,ENSMUSG00000020532:mmu-miR-451a,ENSMUSG00000027104:mmu-miR-451a,ENSMUSG00000051177:mmu-miR-466i-5p,ENSMUSG00000050697:mmu-miR-451a
Organismal Systems	Immune system	Platelet activation	ko04611	12	585	0.18706	0.455959	ENSMUSG00000051177:mmu-miR-466i-5p,ENSMUSG00000044951:mmu-miR-466i-5p,ENSMUSG00000044951:mmu-miR-574-5p,ENSMUSG00000019699:mmu-miR-451a,ENSMUSG00000053137:mmu-miR-466i-5p,ENSMUSG00000002699:mmu-miR-466i-5p,ENSMUSG00000020611:mmu-miR-466i-5p,ENSMUSG00000037643:mmu-miR-466i-5p,ENSMUSG00000029661:mmu-let-7i-5p,ENSMUSG00000014956:mmu-miR-574-5p,ENSMUSG00000020901:mmu-miR-466i-5p,ENSMUSG00000000001:mm…
Environmental Information Processing	Signal transduction	Ras signaling pathway	ko04014	8	363	0.193417	0.461479	ENSMUSG00000000120:mmu-miR-466i-5p,ENSMUSG00000020901:mmu-miR-466i-5p,ENSMUSG00000005534:mmu-miR-466i-5p,ENSMUSG00000032413:mmu-miR-466i-5p,ENSMUSG00000005533:mmu-miR-466i-5p,ENSMUSG00000070565:mmu-miR-466i-5p,ENSMUSG00000027669:mmu-miR-466i-5p,ENSMUSG00000019699:mmu-miR-451a
Organismal Systems	Environmental adaptation	Circadian entrainment	ko04713	4	155	0.213148	0.467936	ENSMUSG00000001986:mmu-miR-466i-5p,ENSMUSG00000001986:mmu-miR-574-5p,ENSMUSG00000027669:mmu-miR-466i-5p,ENSMUSG00000000001:mmu-miR-451a,ENSMUSG00000051177:mmu-miR-466i-5p
Organismal Systems	Endocrine system	Renin secretion	ko04924	3	103	0.208719	0.467936	ENSMUSG00000021939:mmu-miR-574-5p,ENSMUSG00000000001:mmu-miR-451a,ENSMUSG00000051177:mmu-miR-466i-5p
Organismal Systems	Digestive system	Carbohydrate digestion and absorption	ko04973	2	57	0.216397	0.467936	ENSMUSG00000020901:mmu-miR-466i-5p,ENSMUSG00000019699:mmu-miR-451a
Metabolism	Amino acid metabolism	Tyrosine metabolism	ko00350	2	61	0.238948	0.486662	ENSMUSG00000033307:mmu-miR-451a,ENSMUSG00000025037:mmu-miR-574-5p
Organismal Systems	Endocrine system	Insulin signaling pathway	ko04910	7	346	0.279029	0.533957	ENSMUSG00000020532:mmu-miR-451a,ENSMUSG00000014956:mmu-miR-574-5p,ENSMUSG00000037643:mmu-miR-466i-5p,ENSMUSG00000019699:mmu-miR-451a,ENSMUSG00000020901:mmu-miR-466i-5p,ENSMUSG00000050697:mmu-miR-451a,ENSMUSG00000005534:mmu-miR-466i-5p
Environmental Information Processing	Signal transduction	ErbB signaling pathway	ko04012	3	132	0.327801	0.575866	ENSMUSG00000022346:mmu-miR-451a,ENSMUSG00000020901:mmu-miR-466i-5p,ENSMUSG00000019699:mmu-miR-451a
Environmental Information Processing	Signal transduction	NF-kappa B signaling pathway	ko04064	7	372	0.34209	0.593999	ENSMUSG00000068105:mmu-miR-466i-5p,ENSMUSG00000024401:mmu-miR-19a-3p,ENSMUSG00000025860:mmu-miR-451a,ENSMUSG00000016024:mmu-miR-466i-5p,ENSMUSG00000025779:mmu-miR-466i-5p,ENSMUSG00000028284:mmu-miR-466i-5p,ENSMUSG00000057329:mmu-miR-466i-5p
Cellular Processes	Cell growth and death	Apoptosis - fly	ko04214	3	139	0.357004	0.595007	ENSMUSG00000025860:mmu-miR-451a,ENSMUSG00000026029:mmu-miR-466i-5p,ENSMUSG00000028284:mmu-miR-466i-5p
Organismal Systems	Endocrine system	Melanogenesis	ko04916	3	139	0.357004	0.595007	ENSMUSG00000049791:mmu-miR-19a-3p,ENSMUSG00000051177:mmu-miR-466i-5p,ENSMUSG00000000001:mmu-miR-451a
Cellular Processes	Cellular community - eukaryotes	Focal adhesion	ko04510	12	691	0.366697	0.605983	ENSMUSG00000044951:mmu-miR-466i-5p,ENSMUSG00000044951:mmu-miR-574-5p,ENSMUSG00000019699:mmu-miR-451a,ENSMUSG00000039115:mmu-miR-466i-5p,ENSMUSG00000005533:mmu-miR-466i-5p,ENSMUSG00000013663:mmu-miR-19a-3p,ENSMUSG00000013663:mmu-miR-19a-3p,ENSMUSG00000025278:mmu-miR-466i-5p,ENSMUSG00000057329:mmu-miR-466i-5p,ENSMUSG00000032243:mmu-miR-466i-5p,ENSMUSG00000029661:mmu-let-7i-5p,ENSMUSG00000014956:mmu…
Organismal Systems	Endocrine system	Thyroid hormone synthesis	ko04918	2	91	0.406019	0.636602	ENSMUSG00000027104:mmu-miR-451a,ENSMUSG00000051177:mmu-miR-466i-5p
Organismal Systems	Nervous system	Serotonergic synapse	ko04726	4	221	0.437362	0.656043	ENSMUSG00000051177:mmu-miR-466i-5p,ENSMUSG00000025037:mmu-miR-574-5p,ENSMUSG00000000001:mmu-miR-451a,ENSMUSG00000027669:mmu-miR-466i-5p
Organismal Systems	Immune system	Fc epsilon RI signaling pathway	ko04664	5	294	0.467452	0.686578	ENSMUSG00000019699:mmu-miR-451a,ENSMUSG00000002699:mmu-miR-466i-5p,ENSMUSG00000024401:mmu-miR-19a-3p,ENSMUSG00000020901:mmu-miR-466i-5p,ENSMUSG00000053137:mmu-miR-466i-5p
Organismal Systems	Nervous system	Retrograde endocannabinoid signaling	ko04723	5	297	0.476253	0.693054	ENSMUSG00000051177:mmu-miR-466i-5p,ENSMUSG00000001986:mmu-miR-466i-5p,ENSMUSG00000001986:mmu-miR-574-5p,ENSMUSG00000027669:mmu-miR-466i-5p,ENSMUSG00000053137:mmu-miR-466i-5p,ENSMUSG00000000001:mmu-miR-451a
Organismal Systems	Sensory system	Taste transduction	ko04742	2	107	0.488121	0.69477	ENSMUSG00000075318:mmu-miR-466i-5p,ENSMUSG00000023033:mmu-miR-451a
Metabolism	Carbohydrate metabolism	Pyruvate metabolism	ko00620	2	115	0.526439	0.728054	ENSMUSG00000027452:mmu-miR-466i-5p,ENSMUSG00000020532:mmu-miR-451a
Environmental Information Processing	Signal transduction	Phospholipase D signaling pathway	ko04072	6	400	0.574588	0.773925	ENSMUSG00000005534:mmu-miR-466i-5p,ENSMUSG00000020901:mmu-miR-466i-5p,ENSMUSG00000022861:mmu-miR-466i-5p,ENSMUSG00000051177:mmu-miR-466i-5p,ENSMUSG00000020611:mmu-miR-466i-5p,ENSMUSG00000019699:mmu-miR-451a
Organismal Systems	Nervous system	GABAergic synapse	ko04727	2	127	0.580181	0.774899	ENSMUSG00000027669:mmu-miR-466i-5p,ENSMUSG00000000001:mmu-miR-451a
Environmental Information Processing	Signal transduction	Hippo signaling pathway	ko04390	10	698	0.625867	0.813627	ENSMUSG00000020135:mmu-let-7i-5p,ENSMUSG00000022346:mmu-miR-451a,ENSMUSG00000009073:mmu-let-7i-5p,ENSMUSG00000049791:mmu-miR-19a-3p,ENSMUSG00000002603:mmu-miR-130b-3p,ENSMUSG00000014956:mmu-miR-574-5p,ENSMUSG00000037643:mmu-miR-466i-5p,ENSMUSG00000022676:mmu-miR-466i-5p,ENSMUSG00000022285:mmu-miR-451a,ENSMUSG00000039239:mmu-miR-466i-5p
Organismal Systems	Endocrine system	Oxytocin signaling pathway	ko04921	9	641	0.647517	0.836198	ENSMUSG00000044951:mmu-miR-466i-5p,ENSMUSG00000044951:mmu-miR-574-5p,ENSMUSG00000033016:mmu-miR-466i-5p,ENSMUSG00000010066:mmu-miR-466i-5p,ENSMUSG00000051177:mmu-miR-466i-5p,ENSMUSG00000049112:mmu-miR-466i-5p,ENSMUSG00000014956:mmu-miR-574-5p,ENSMUSG00000000001:mmu-miR-451a,ENSMUSG00000050697:mmu-miR-451a,ENSMUSG00000039145:mmu-miR-466i-5p
Cellular Processes	Cell growth and death	Oocyte meiosis	ko04114	3	223	0.664768	0.84889	ENSMUSG00000005533:mmu-miR-466i-5p,ENSMUSG00000014956:mmu-miR-574-5p,ENSMUSG00000022285:mmu-miR-451a
Cellular Processes	Cell growth and death	Apoptosis	ko04210	9	663	0.686229	0.86332	ENSMUSG00000025860:mmu-miR-451a,ENSMUSG00000021939:mmu-miR-574-5p,ENSMUSG00000020901:mmu-miR-466i-5p,ENSMUSG00000057329:mmu-miR-466i-5p,ENSMUSG00000027381:mmu-miR-466i-5p,ENSMUSG00000057446:mmu-let-7i-5p,ENSMUSG00000024401:mmu-miR-19a-3p,ENSMUSG00000019699:mmu-miR-451a,ENSMUSG00000026029:mmu-miR-466i-5p
Environmental Information Processing	Signal transduction	Rap1 signaling pathway	ko04015	10	763	0.731929	0.90333	ENSMUSG00000037643:mmu-miR-466i-5p,ENSMUSG00000000120:mmu-miR-466i-5p,ENSMUSG00000020901:mmu-miR-466i-5p,ENSMUSG00000005534:mmu-miR-466i-5p,ENSMUSG00000000001:mmu-miR-451a,ENSMUSG00000019699:mmu-miR-451a,ENSMUSG00000051177:mmu-miR-466i-5p,ENSMUSG00000053137:mmu-miR-466i-5p,ENSMUSG00000002699:mmu-miR-466i-5p,ENSMUSG00000005533:mmu-miR-466i-5p
Cellular Processes	Cellular community - eukaryotes	Gap junction	ko04540	2	167	0.726392	0.90333	ENSMUSG00000000001:mmu-miR-451a,ENSMUSG00000051177:mmu-miR-466i-5p
Organismal Systems	Immune system	Complement and coagulation cascades	ko04610	1	114	0.827743	0.9557	ENSMUSG00000074743:mmu-miR-451a
Organismal Systems	Immune system	B cell receptor signaling pathway	ko04662	3	299	0.837612	0.9557	ENSMUSG00000020901:mmu-miR-466i-5p,ENSMUSG00000019699:mmu-miR-451a,ENSMUSG00000033016:mmu-miR-466i-5p
Organismal Systems	Immune system	Fc gamma R-mediated phagocytosis	ko04666	4	364	0.809212	0.9557	ENSMUSG00000019699:mmu-miR-451a,ENSMUSG00000036995:mmu-miR-466i-5p,ENSMUSG00000021948:mmu-miR-466i-5p,ENSMUSG00000020901:mmu-miR-466i-5p
Environmental Information Processing	Signal transduction	Hippo signaling pathway -fly	ko04391	6	591	0.890609	0.986754	ENSMUSG00000009073:mmu-let-7i-5p,ENSMUSG00000022346:mmu-miR-451a,ENSMUSG00000027339:mmu-miR-466i-5p,ENSMUSG00000022285:mmu-miR-451a,ENSMUSG00000033306:mmu-miR-466i-5p,ENSMUSG00000037643:mmu-miR-466i-5p
Genetic Information Processing	Folding, sorting and degradation	Ubiquitin mediated proteolysis	ko04120	6	621	0.91508	0.996875	ENSMUSG00000002603:mmu-miR-130b-3p,ENSMUSG00000024589:mmu-miR-466i-5p,ENSMUSG00000020184:mmu-miR-466i-5p,ENSMUSG00000036782:mmu-miR-466i-5p,ENSMUSG00000025860:mmu-miR-451a,ENSMUSG00000019944:mmu-miR-466i-5p
Genetic Information Processing	Translation	RNA transport	ko03013	2	463	0.993743	1	ENSMUSG00000053293:mmu-miR-451a,ENSMUSG00000001855:mmu-let-7i-5p
Environmental Information Processing	Signal transduction	HIF-1 signaling pathway	ko04066	6	721	0.965636	1	ENSMUSG00000057329:mmu-miR-466i-5p,ENSMUSG00000019699:mmu-miR-451a,ENSMUSG00000005534:mmu-miR-466i-5p,ENSMUSG00000005533:mmu-miR-466i-5p,ENSMUSG00000020901:mmu-miR-466i-5p,ENSMUSG00000025746:mmu-let-7i-5p
Cellular Processes	Cell growth and death	Necroptosis	ko04217	5	629	0.965023	1	ENSMUSG00000024401:mmu-miR-19a-3p,ENSMUSG00000025860:mmu-miR-451a,ENSMUSG00000026029:mmu-miR-466i-5p,ENSMUSG00000057329:mmu-miR-466i-5p,ENSMUSG00000022967:mmu-let-7i-5p
Cellular Processes	Cellular community - eukaryotes	Tight junction	ko04530	7	833	0.972371	1	ENSMUSG00000024589:mmu-miR-466i-5p,ENSMUSG00000002603:mmu-miR-130b-3p,ENSMUSG00000037643:mmu-miR-466i-5p,ENSMUSG00000050697:mmu-miR-451a,ENSMUSG00000009073:mmu-let-7i-5p,ENSMUSG00000022952:mmu-miR-466i-5p,ENSMUSG00000028076:mmu-miR-466i-5p
Organismal Systems	Immune system	Leukocyte transendothelial migration	ko04670	3	573	0.99315	1	ENSMUSG00000020901:mmu-miR-466i-5p,ENSMUSG00000053137:mmu-miR-466i-5p,ENSMUSG00000000001:mmu-miR-451a
Organismal Systems	Endocrine system	Thyroid hormone signaling pathway	ko04919	5	572	0.938949	1	ENSMUSG00000019699:mmu-miR-451a,ENSMUSG00000051177:mmu-miR-466i-5p,ENSMUSG00000020184:mmu-miR-466i-5p,ENSMUSG00000022346:mmu-miR-451a,ENSMUSG00000020901:mmu-miR-466i-5p
