# Supplementary material for: Exosomal MicroRNAs modulate the cognitive function in fasudil treated APPswe/PSEN1dE9 transgenic (APP/PS1) mice model of Alzheimer's disease
Source: Research Square preprint supplement (doi:10.21203/rs.3.rs-1895492/v1), 2022-08-08
Supplement: Supplementary file 5 [file a38c474a1dd99e7dd727355d.xlsx]

## Sheet: WT_vs_ADNS.DE
WT_vs_ADNS.Differential_analysis_results
sRNA_tpm	WT_A	WT_B	ADNS_A	ADNS_B	log2FoldChange	pval
novel_130	39462.9	0	0	0	-9.5033	0.047063
novel_56	5755	7638.73	0	0	-7.448	0.0066963
mmu-miR-1903	25760.5	14378.8	4415.01	1239.16	-3.04	0.0058736
mmu-miR-7058-3p	58098.1	40889.7	7910.23	11648.1	-2.5302	0.0018204
mmu-miR-25-3p	24116.2	36845.7	53532	120694	1.512	0.038549
mmu-miR-144-3p	2192.38	7638.73	14900.7	26518	2.2458	0.025886
novel_131	0	224.669	2391.46	10408.9	5.7948	0.0283
mmu-miR-126a-3p	0	0	5334.81	2230.48	6.3615	0.048557
mmu-miR-142a-3p	0	0	5150.85	3221.81	6.505	0.037973
mmu-miR-142b	0	0	5150.85	3221.81	6.505	0.037973
mmu-miR-140-3p	0	0	4047.09	4708.8	6.5648	0.034056
mmu-miR-451a	0	0	3863.13	5204.46	6.6142	0.031333
mmu-let-7i-5p	0	0	2391.46	6939.28	6.6503	0.030465
mmu-miR-1a-3p	0	0	10853.6	247.831	6.9224	0.026137
mmu-miR-1b-5p	0	0	10853.6	247.831	6.9224	0.026137
mmu-miR-16-5p	0	0	919.794	12887.2	7.2102	0.011791
mmu-miR-19a-3p	0	0	2207.51	14374.2	7.4763	0.0047744

## Sheet: ADNS_vs_ADF.DE
ADNS_vs_ADF.Differential_analysis_results
sRNA_tpm	ADNS_A	ADNS_B	ADF_A	ADF_B	log2FoldChange	pval
mmu-miR-130b-3p	5334.81	15613.4	0	0	-7.8612	0.0020358
novel_63	9197.94	5700.12	0		-7.5538	0.0062166
mmu-miR-19a-3p	2207.51	14374.2	0	0	-7.4565	0.0092767
mmu-miR-451a	3863.13	5204.46	0	0	-6.7432	0.049054
mmu-miR-423-5p	7726.27	8426.27	258.866	0	-6.1866	0.015919
mmu-miR-574-5p	36975.7	19578.7	10354.6	5743.24	-2.2644	0.025623
mmu-miR-466i-5p	310155	158116	105100	51013.5	-2.0394	0.017422
mmu-let-7i-5p	2391.46	6939.28	24851.2	29391.9	2.2615	0.044319

## Sheet: WT_vs_ADNS_ADNS_vs_ADF.venn
WT_vs_ADNS_ADNS_vs_ADF.venn
	WT_vs_ADNS							ADNS_vs_ADF
sRNA_tpm	WT_A	WT_B	ADNS_A	ADNS_B	log2FoldChange	pval		ADNS_A	ADNS_B	ADF_A	ADF_B	log2FoldChange	pval
mmu-let-7i-5p	0	0	2391.46	6939.28	6.6503	0.030465		2391.46	6939.28	24851.2	29391.9	2.2615	0.044319
mmu-miR-19a-3p	0	0	2207.51	14374.2	7.4763	0.0047744		2207.51	14374.2	0	0	-7.4565	0.0092767
mmu-miR-451a	0	0	3863.13	5204.46	6.6142	0.031333		3863.13	5204.46	0	0	-6.7432	0.049054
