# Supplementary material for: Exosomal MicroRNAs modulate the cognitive function in fasudil treated APPswe/PSEN1dE9 transgenic (APP/PS1) mice model of Alzheimer's disease
Source: Research Square preprint supplement (doi:10.21203/rs.3.rs-1895492/v1), 2022-08-08
Supplement: Supplementary file 6 [file c733e6aa8329883d8fd2321f.xlsx]

## Sheet: WT_vs_ADNS.DEG.GO_enrichment
GO_class	GO ID	GO_term	Hit_number	Background number	P-Value	Q-Value	Gene IDs
Biological Process	GO:0010604	positive regulation of macromolecule metabolic process	142	4962	1.1788e-26	9.34079e-23	ENSMUSG00000048251:mmu-miR-16-5p,ENSMUSG00000036707:mmu-miR-144-3p,ENSMUSG00000036707:mmu-miR-451a,ENSMUSG00000039086:mmu-miR-1b-5p,ENSMUSG00000024563:mmu-miR-140-3p,ENSMUSG00000039661:mmu-miR-1903,ENSMUSG00000090877:mmu-miR-1a-3p,ENSMUSG00000031392:mmu-miR-142a-3p,ENSMUSG00000000902:mmu-miR-1a-3p,ENSMUSG00000027164:mmu-miR-144-3p,ENSMUSG00000020423:mmu-miR-25-3p,ENSMUSG00000034563:mmu-miR-1b-5p,…
Biological Process	GO:0010628	positive regulation of gene expression	106	3013	4.04273e-26	1.06782e-22	ENSMUSG00000027104:mmu-miR-1b-5p,ENSMUSG00000027104:mmu-miR-451a,ENSMUSG00000002111:mmu-miR-126a-3p,ENSMUSG00000003847:mmu-miR-1a-3p,ENSMUSG00000053007:mmu-miR-16-5p,ENSMUSG00000061665:mmu-miR-142a-3p,ENSMUSG00000004099:mmu-miR-126a-3p,ENSMUSG00000032035:mmu-miR-1a-3p,ENSMUSG00000015709:mmu-miR-451a,ENSMUSG00000027276:mmu-miR-16-5p,ENSMUSG00000025746:mmu-let-7i-5p,ENSMUSG00000025746:mmu-miR-142a-…
Biological Process	GO:0044707	single-multicellular organism process	226	10746	2.74215e-26	1.06782e-22	ENSMUSG00000062908:mmu-miR-19a-3p,ENSMUSG00000009073:mmu-let-7i-5p,ENSMUSG00000020315:mmu-miR-144-3p,ENSMUSG00000054272:mmu-miR-1b-5p,ENSMUSG00000027951:mmu-miR-1a-3p,ENSMUSG00000005958:mmu-miR-1b-5p,ENSMUSG00000048482:mmu-miR-1a-3p,ENSMUSG00000027665:mmu-miR-1b-5p,ENSMUSG00000046876:mmu-miR-19a-3p,ENSMUSG00000001175:mmu-miR-1a-3p,ENSMUSG00000002068:mmu-miR-16-5p,ENSMUSG00000020053:mmu-miR-1a-3p,…
Biological Process	GO:0009653	anatomical structure morphogenesis	123	3957	8.7154e-26	1.72652e-22	ENSMUSG00000038227:mmu-miR-126a-3p,ENSMUSG00000022892:mmu-miR-16-5p,ENSMUSG00000022505:mmu-miR-1903,ENSMUSG00000034908:mmu-miR-451a,ENSMUSG00000015605:mmu-miR-1a-3p,ENSMUSG00000036144:mmu-miR-1a-3p,ENSMUSG00000068327:mmu-miR-1a-3p,ENSMUSG00000030201:mmu-miR-19a-3p,ENSMUSG00000019699:mmu-miR-451a,ENSMUSG00000046020:mmu-miR-1b-5p,ENSMUSG00000022346:mmu-miR-451a,ENSMUSG00000038193:mmu-miR-1a-3p,ENSM…
Biological Process	GO:0048856	anatomical structure development	215	10111	4.29192e-25	6.80184e-22	ENSMUSG00000052155:mmu-miR-1b-5p,ENSMUSG00000020135:mmu-let-7i-5p,ENSMUSG00000057329:mmu-miR-16-5p,ENSMUSG00000025867:mmu-miR-1903,ENSMUSG00000020053:mmu-miR-1a-3p,ENSMUSG00000030084:mmu-miR-1b-5p,ENSMUSG00000027665:mmu-miR-1b-5p,ENSMUSG00000048482:mmu-miR-1a-3p,ENSMUSG00000005958:mmu-miR-1b-5p,ENSMUSG00000001175:mmu-miR-1a-3p,ENSMUSG00000046876:mmu-miR-19a-3p,ENSMUSG00000002068:mmu-miR-16-5p,ENS…
Biological Process	GO:0009893	positive regulation of metabolic process	149	5595	6.31896e-25	8.34524e-22	ENSMUSG00000003452:mmu-miR-16-5p,ENSMUSG00000055116:mmu-miR-142a-3p,ENSMUSG00000038193:mmu-miR-1a-3p,ENSMUSG00000015605:mmu-miR-1a-3p,ENSMUSG00000036144:mmu-miR-1a-3p,ENSMUSG00000030201:mmu-miR-19a-3p,ENSMUSG00000047888:mmu-miR-1b-5p,ENSMUSG00000023050:mmu-miR-19a-3p,ENSMUSG00000054611:mmu-miR-19a-3p,ENSMUSG00000023951:mmu-miR-16-5p,ENSMUSG00000023951:mmu-miR-126a-3p,ENSMUSG00000096688:mmu-miR-1a…
Biological Process	GO:0045935	positive regulation of nucleobase-containing compound metabolic process	98	2754	2.15721e-24	2.13672e-21	ENSMUSG00000031834:mmu-miR-126a-3p,ENSMUSG00000026313:mmu-miR-1a-3p,ENSMUSG00000031483:mmu-miR-16-5p,ENSMUSG00000002748:mmu-miR-1903,ENSMUSG00000042292:mmu-miR-1a-3p,ENSMUSG00000022306:mmu-miR-19a-3p,ENSMUSG00000005533:mmu-miR-1a-3p,ENSMUSG00000024921:mmu-miR-142a-3p,ENSMUSG00000023951:mmu-miR-16-5p,ENSMUSG00000023951:mmu-miR-126a-3p,ENSMUSG00000026234:mmu-miR-16-5p,ENSMUSG00000030201:mmu-miR-19a…
Biological Process	GO:0048869	cellular developmental process	173	7220	1.935e-24	2.13672e-21	ENSMUSG00000027087:mmu-miR-16-5p,ENSMUSG00000021256:mmu-miR-1903,ENSMUSG00000034957:mmu-miR-144-3p,ENSMUSG00000025081:mmu-miR-1b-5p,ENSMUSG00000006678:mmu-miR-1a-3p,ENSMUSG00000029104:mmu-miR-1b-5p,ENSMUSG00000065954:mmu-miR-16-5p,ENSMUSG00000022861:mmu-miR-1903,ENSMUSG00000094793:mmu-miR-1a-3p,ENSMUSG00000040943:mmu-miR-19a-3p,ENSMUSG00000019647:mmu-miR-142a-3p,ENSMUSG00000038145:mmu-miR-451a,EN…
Biological Process	GO:0007275	multicellular organism development	200	9161	3.93558e-24	3.43629e-21	ENSMUSG00000066568:mmu-miR-451a,ENSMUSG00000056493:mmu-miR-1b-5p,ENSMUSG00000027654:mmu-miR-19a-3p,ENSMUSG00000024401:mmu-miR-19a-3p,ENSMUSG00000066551:mmu-miR-142a-3p,ENSMUSG00000054387:mmu-miR-16-5p,ENSMUSG00000033540:mmu-miR-16-5p,ENSMUSG00000029661:mmu-let-7i-5p,ENSMUSG00000049336:mmu-miR-451a,ENSMUSG00000026029:mmu-miR-1b-5p,ENSMUSG00000031972:mmu-miR-1a-3p,ENSMUSG00000020099:mmu-miR-1b-5p,E…
Biological Process	GO:0031325	positive regulation of cellular metabolic process	141	5204	4.33657e-24	3.43629e-21	ENSMUSG00000094793:mmu-miR-1a-3p,ENSMUSG00000040943:mmu-miR-19a-3p,ENSMUSG00000029104:mmu-miR-1b-5p,ENSMUSG00000006678:mmu-miR-1a-3p,ENSMUSG00000027715:mmu-miR-1b-5p,ENSMUSG00000027087:mmu-miR-16-5p,ENSMUSG00000034957:mmu-miR-144-3p,ENSMUSG00000044647:mmu-miR-1b-5p,ENSMUSG00000022967:mmu-let-7i-5p,ENSMUSG00000050697:mmu-miR-144-3p,ENSMUSG00000050697:mmu-miR-451a,ENSMUSG00000026349:mmu-miR-16-5p,E…
Biological Process	GO:0048731	system development	181	7891	1.295e-23	9.32871e-21	ENSMUSG00000028717:mmu-miR-126a-3p,ENSMUSG00000041120:mmu-miR-1903,ENSMUSG00000042448:mmu-miR-1b-5p,ENSMUSG00000063626:mmu-miR-1903,ENSMUSG00000057123:mmu-miR-144-3p,ENSMUSG00000021109:mmu-miR-144-3p,ENSMUSG00000039579:mmu-miR-451a,ENSMUSG00000025586:mmu-miR-1a-3p,ENSMUSG00000025586:mmu-miR-25-3p,ENSMUSG00000028136:mmu-miR-19a-3p,ENSMUSG00000028136:mmu-miR-1b-5p,ENSMUSG00000054263:mmu-miR-144-3p,…
Biological Process	GO:0048518	positive regulation of biological process	198	9136	2.14777e-23	1.41824e-20	ENSMUSG00000032913:mmu-miR-144-3p,ENSMUSG00000022346:mmu-miR-451a,ENSMUSG00000028184:mmu-miR-451a,ENSMUSG00000034673:mmu-miR-1903,ENSMUSG00000055980:mmu-miR-126a-3p,ENSMUSG00000027273:mmu-miR-19a-3p,ENSMUSG00000022505:mmu-miR-1903,ENSMUSG00000014074:mmu-miR-16-5p,ENSMUSG00000022892:mmu-miR-16-5p,ENSMUSG00000025860:mmu-miR-451a,ENSMUSG00000019699:mmu-miR-451a,ENSMUSG00000026234:mmu-miR-16-5p,ENSMU…
Biological Process	GO:0032502	developmental process	222	11049	9.20114e-23	5.20785e-20	ENSMUSG00000022952:mmu-miR-126a-3p,ENSMUSG00000068299:mmu-miR-19a-3p,ENSMUSG00000021549:mmu-miR-1a-3p,ENSMUSG00000003282:mmu-miR-1b-5p,ENSMUSG00000056158:mmu-miR-144-3p,ENSMUSG00000070780:mmu-miR-1b-5p,ENSMUSG00000055204:mmu-miR-451a,ENSMUSG00000000402:mmu-miR-142a-3p,ENSMUSG00000026012:mmu-miR-1b-5p,ENSMUSG00000003032:mmu-miR-1a-3p,ENSMUSG00000022788:mmu-miR-16-5p,ENSMUSG00000052684:mmu-miR-16-5…
Biological Process	GO:0044767	single-organism developmental process	221	10966	8.56681e-23	5.20785e-20	ENSMUSG00000020193:mmu-miR-25-3p,ENSMUSG00000049336:mmu-miR-451a,ENSMUSG00000020099:mmu-miR-1b-5p,ENSMUSG00000031972:mmu-miR-1a-3p,ENSMUSG00000026029:mmu-miR-1b-5p,ENSMUSG00000027654:mmu-miR-19a-3p,ENSMUSG00000056493:mmu-miR-1b-5p,ENSMUSG00000066568:mmu-miR-451a,ENSMUSG00000029661:mmu-let-7i-5p,ENSMUSG00000033540:mmu-miR-16-5p,ENSMUSG00000066551:mmu-miR-142a-3p,ENSMUSG00000054387:mmu-miR-16-5p,EN…
Biological Process	GO:0006357	regulation of transcription from RNA polymerase II promoter	99	2966	1.32668e-22	6.21837e-20	ENSMUSG00000022306:mmu-miR-19a-3p,ENSMUSG00000033961:mmu-miR-1b-5p,ENSMUSG00000031834:mmu-miR-126a-3p,ENSMUSG00000031483:mmu-miR-16-5p,ENSMUSG00000026313:mmu-miR-1a-3p,ENSMUSG00000042292:mmu-miR-1a-3p,ENSMUSG00000023951:mmu-miR-16-5p,ENSMUSG00000023951:mmu-miR-126a-3p,ENSMUSG00000026234:mmu-miR-16-5p,ENSMUSG00000024921:mmu-miR-142a-3p,ENSMUSG00000037395:mmu-miR-144-3p,ENSMUSG00000022892:mmu-miR-1…
Biological Process	GO:0051173	positive regulation of nitrogen compound metabolic process	131	4778	1.33408e-22	6.21837e-20	ENSMUSG00000028717:mmu-miR-126a-3p,ENSMUSG00000021109:mmu-miR-144-3p,ENSMUSG00000025586:mmu-miR-1a-3p,ENSMUSG00000025586:mmu-miR-25-3p,ENSMUSG00000020593:mmu-miR-1903,ENSMUSG00000013663:mmu-miR-19a-3p,ENSMUSG00000013663:mmu-miR-19a-3p,ENSMUSG00000013663:mmu-miR-144-3p,ENSMUSG00000045515:mmu-miR-140-3p,ENSMUSG00000017491:mmu-miR-1a-3p,ENSMUSG00000029816:mmu-miR-1903,ENSMUSG00000003847:mmu-miR-1a-3…
Biological Process	GO:0051254	positive regulation of RNA metabolic process	87	2355	1.29912e-22	6.21837e-20	ENSMUSG00000026012:mmu-miR-1b-5p,ENSMUSG00000028890:mmu-miR-1b-5p,ENSMUSG00000003032:mmu-miR-1a-3p,ENSMUSG00000027210:mmu-let-7i-5p,ENSMUSG00000052684:mmu-miR-16-5p,ENSMUSG00000041075:mmu-miR-1a-3p,ENSMUSG00000041075:mmu-miR-126a-3p,ENSMUSG00000031930:mmu-miR-25-3p,ENSMUSG00000022952:mmu-miR-126a-3p,ENSMUSG00000003282:mmu-miR-1b-5p,ENSMUSG00000030557:mmu-miR-1a-3p,ENSMUSG00000038766:mmu-miR-1b-5p…
Biological Process	GO:0045893	positive regulation of transcription, DNA-templated	84	2235	2.73606e-22	1.09334e-19	ENSMUSG00000023333:mmu-miR-1903,ENSMUSG00000038331:mmu-miR-1b-5p,ENSMUSG00000037523:mmu-miR-1b-5p,ENSMUSG00000028086:mmu-miR-25-3p,ENSMUSG00000009555:mmu-miR-1a-3p,ENSMUSG00000060206:mmu-miR-1b-5p,ENSMUSG00000009900:mmu-miR-16-5p,ENSMUSG00000032113:mmu-miR-1b-5p,ENSMUSG00000052684:mmu-miR-16-5p,ENSMUSG00000026012:mmu-miR-1b-5p,ENSMUSG00000028890:mmu-miR-1b-5p,ENSMUSG00000003032:mmu-miR-1a-3p,ENSM…
Biological Process	GO:0045944	positive regulation of transcription from RNA polymerase II promoter	74	1769	2.8964e-22	1.09334e-19	ENSMUSG00000037225:mmu-miR-16-5p,ENSMUSG00000028736:mmu-miR-1a-3p,ENSMUSG00000022528:mmu-miR-1a-3p,ENSMUSG00000021109:mmu-miR-144-3p,ENSMUSG00000020542:mmu-miR-1a-3p,ENSMUSG00000017652:mmu-miR-16-5p,ENSMUSG00000039005:mmu-miR-1b-5p,ENSMUSG00000028717:mmu-miR-126a-3p,ENSMUSG00000004872:mmu-miR-1a-3p,ENSMUSG00000015709:mmu-miR-451a,ENSMUSG00000032035:mmu-miR-1a-3p,ENSMUSG00000027276:mmu-miR-16-5p,E…
Biological Process	GO:1902680	positive regulation of RNA biosynthetic process	84	2237	2.89754e-22	1.09334e-19	ENSMUSG00000056493:mmu-miR-1b-5p,ENSMUSG00000000902:mmu-miR-1a-3p,ENSMUSG00000034563:mmu-miR-1b-5p,ENSMUSG00000027164:mmu-miR-144-3p,ENSMUSG00000026349:mmu-miR-16-5p,ENSMUSG00000054387:mmu-miR-16-5p,ENSMUSG00000066551:mmu-miR-142a-3p,ENSMUSG00000022967:mmu-let-7i-5p,ENSMUSG00000044647:mmu-miR-1b-5p,ENSMUSG00000024401:mmu-miR-19a-3p,ENSMUSG00000026434:mmu-miR-451a,ENSMUSG00000048251:mmu-miR-16-5p,…
Biological Process	GO:1903508	positive regulation of nucleic acid-templated transcription	84	2235	2.73606e-22	1.09334e-19	ENSMUSG00000032113:mmu-miR-1b-5p,ENSMUSG00000060206:mmu-miR-1b-5p,ENSMUSG00000009555:mmu-miR-1a-3p,ENSMUSG00000009900:mmu-miR-16-5p,ENSMUSG00000037523:mmu-miR-1b-5p,ENSMUSG00000028086:mmu-miR-25-3p,ENSMUSG00000038331:mmu-miR-1b-5p,ENSMUSG00000023333:mmu-miR-1903,ENSMUSG00000038766:mmu-miR-1b-5p,ENSMUSG00000027490:mmu-miR-1b-5p,ENSMUSG00000041515:mmu-miR-451a,ENSMUSG00000022952:mmu-miR-126a-3p,ENS…
Biological Process	GO:0048522	positive regulation of cellular process	184	8354	5.03518e-22	1.81358e-19	ENSMUSG00000038766:mmu-miR-1b-5p,ENSMUSG00000003282:mmu-miR-1b-5p,ENSMUSG00000021549:mmu-miR-1a-3p,ENSMUSG00000022952:mmu-miR-126a-3p,ENSMUSG00000055204:mmu-miR-451a,ENSMUSG00000031930:mmu-miR-25-3p,ENSMUSG00000041075:mmu-miR-1a-3p,ENSMUSG00000041075:mmu-miR-126a-3p,ENSMUSG00000003032:mmu-miR-1a-3p,ENSMUSG00000026012:mmu-miR-1b-5p,ENSMUSG00000028890:mmu-miR-1b-5p,ENSMUSG00000022788:mmu-miR-16-5p,…
Biological Process	GO:0006366	transcription from RNA polymerase II promoter	101	3176	1.53736e-21	5.29654e-19	ENSMUSG00000028717:mmu-miR-126a-3p,ENSMUSG00000017652:mmu-miR-16-5p,ENSMUSG00000041120:mmu-miR-1903,ENSMUSG00000039005:mmu-miR-1b-5p,ENSMUSG00000020542:mmu-miR-1a-3p,ENSMUSG00000022528:mmu-miR-1a-3p,ENSMUSG00000021109:mmu-miR-144-3p,ENSMUSG00000048540:mmu-miR-1903,ENSMUSG00000028736:mmu-miR-1a-3p,ENSMUSG00000037225:mmu-miR-16-5p,ENSMUSG00000052565:mmu-miR-1b-5p,ENSMUSG00000040752:mmu-miR-1a-3p,EN…
Biological Process	GO:0019219	regulation of nucleobase-containing compound metabolic process	157	6622	3.3314e-21	1.09992e-18	ENSMUSG00000070348:mmu-miR-16-5p,ENSMUSG00000037523:mmu-miR-1b-5p,ENSMUSG00000038331:mmu-miR-1b-5p,ENSMUSG00000060206:mmu-miR-1b-5p,ENSMUSG00000032113:mmu-miR-1b-5p,ENSMUSG00000006699:mmu-miR-1a-3p,ENSMUSG00000024384:mmu-miR-1b-5p,ENSMUSG00000073830:mmu-miR-1a-3p,ENSMUSG00000026012:mmu-miR-1b-5p,ENSMUSG00000028890:mmu-miR-1b-5p,ENSMUSG00000003032:mmu-miR-1a-3p,ENSMUSG00000052684:mmu-miR-16-5p,ENS…
Biological Process	GO:0051239	regulation of multicellular organismal process	122	4435	5.47651e-21	1.73583e-18	ENSMUSG00000026234:mmu-miR-16-5p,ENSMUSG00000023951:mmu-miR-16-5p,ENSMUSG00000023951:mmu-miR-126a-3p,ENSMUSG00000000001:mmu-miR-451a,ENSMUSG00000026193:mmu-miR-1a-3p,ENSMUSG00000026193:mmu-miR-140-3p,ENSMUSG00000020838:mmu-miR-16-5p,ENSMUSG00000005533:mmu-miR-1a-3p,ENSMUSG00000022306:mmu-miR-19a-3p,ENSMUSG00000005364:mmu-miR-25-3p,ENSMUSG00000026313:mmu-miR-1a-3p,ENSMUSG00000055116:mmu-miR-142a-3…
Biological Process	GO:0010646	regulation of cell communication	126	4680	5.91564e-21	1.80291e-18	ENSMUSG00000015243:mmu-miR-144-3p,ENSMUSG00000037225:mmu-miR-16-5p,ENSMUSG00000036112:mmu-miR-1903,ENSMUSG00000033307:mmu-miR-451a,ENSMUSG00000039166:mmu-miR-1b-5p,ENSMUSG00000025586:mmu-miR-1a-3p,ENSMUSG00000025586:mmu-miR-25-3p,ENSMUSG00000050953:mmu-miR-1a-3p,ENSMUSG00000020542:mmu-miR-1a-3p,ENSMUSG00000028517:mmu-miR-16-5p,ENSMUSG00000070867:mmu-miR-1903,ENSMUSG00000049791:mmu-miR-19a-3p,ENSM…
Biological Process	GO:0023051	regulation of signaling	126	4718	1.17707e-20	3.45447e-18	ENSMUSG00000078673:mmu-miR-1a-3p,ENSMUSG00000089682:mmu-miR-16-5p,ENSMUSG00000040289:mmu-miR-451a,ENSMUSG00000021944:mmu-miR-1a-3p,ENSMUSG00000013663:mmu-miR-19a-3p,ENSMUSG00000013663:mmu-miR-19a-3p,ENSMUSG00000013663:mmu-miR-144-3p,ENSMUSG00000025746:mmu-let-7i-5p,ENSMUSG00000025746:mmu-miR-142a-3p,ENSMUSG00000027276:mmu-miR-16-5p,ENSMUSG00000031555:mmu-miR-126a-3p,ENSMUSG00000058174:mmu-miR-25-…
Biological Process	GO:0031328	positive regulation of cellular biosynthetic process	95	3005	5.06314e-20	1.43287e-17	ENSMUSG00000037225:mmu-miR-16-5p,ENSMUSG00000015243:mmu-miR-144-3p,ENSMUSG00000028736:mmu-miR-1a-3p,ENSMUSG00000025586:mmu-miR-1a-3p,ENSMUSG00000025586:mmu-miR-25-3p,ENSMUSG00000021109:mmu-miR-144-3p,ENSMUSG00000022528:mmu-miR-1a-3p,ENSMUSG00000020542:mmu-miR-1a-3p,ENSMUSG00000049791:mmu-miR-19a-3p,ENSMUSG00000017652:mmu-miR-16-5p,ENSMUSG00000005580:mmu-miR-142a-3p,ENSMUSG00000039005:mmu-miR-1b-5…
Biological Process	GO:1903506	regulation of nucleic acid-templated transcription	142	5822	6.07643e-20	1.66033e-17	ENSMUSG00000060534:mmu-miR-1903,ENSMUSG00000030557:mmu-miR-1a-3p,ENSMUSG00000041515:mmu-miR-451a,ENSMUSG00000027490:mmu-miR-1b-5p,ENSMUSG00000063804:mmu-miR-1b-5p,ENSMUSG00000027210:mmu-let-7i-5p,ENSMUSG00000002881:mmu-miR-1903,ENSMUSG00000009900:mmu-miR-16-5p,ENSMUSG00000009555:mmu-miR-1a-3p,ENSMUSG00000078866:mmu-miR-25-3p,ENSMUSG00000040651:mmu-miR-451a,ENSMUSG00000030744:mmu-miR-1b-5p,ENSMUSG…
Biological Process	GO:0009891	positive regulation of biosynthetic process	96	3071	6.59274e-20	1.74136e-17	ENSMUSG00000027276:mmu-miR-16-5p,ENSMUSG00000025746:mmu-let-7i-5p,ENSMUSG00000025746:mmu-miR-142a-3p,ENSMUSG00000032035:mmu-miR-1a-3p,ENSMUSG00000015709:mmu-miR-451a,ENSMUSG00000004872:mmu-miR-1a-3p,ENSMUSG00000003847:mmu-miR-1a-3p,ENSMUSG00000027104:mmu-miR-1b-5p,ENSMUSG00000027104:mmu-miR-451a,ENSMUSG00000002111:mmu-miR-126a-3p,ENSMUSG00000061665:mmu-miR-142a-3p,ENSMUSG00000053007:mmu-miR-16-5p…
Biological Process	GO:2001141	regulation of RNA biosynthetic process	142	5830	6.89416e-20	1.76224e-17	ENSMUSG00000094793:mmu-miR-1a-3p,ENSMUSG00000040943:mmu-miR-19a-3p,ENSMUSG00000028271:mmu-miR-1a-3p,ENSMUSG00000006678:mmu-miR-1a-3p,ENSMUSG00000026932:mmu-miR-1b-5p,ENSMUSG00000078619:mmu-miR-1a-3p,ENSMUSG00000027715:mmu-miR-1b-5p,ENSMUSG00000034957:mmu-miR-144-3p,ENSMUSG00000044876:mmu-let-7i-5p,ENSMUSG00000044647:mmu-miR-1b-5p,ENSMUSG00000022967:mmu-let-7i-5p,ENSMUSG00000050697:mmu-miR-144-3p,…
Biological Process	GO:0007399	nervous system development	112	3981	7.43425e-20	1.84091e-17	ENSMUSG00000020838:mmu-miR-16-5p,ENSMUSG00000005533:mmu-miR-1a-3p,ENSMUSG00000033792:mmu-miR-1b-5p,ENSMUSG00000030302:mmu-let-7i-5p,ENSMUSG00000042292:mmu-miR-1a-3p,ENSMUSG00000052656:mmu-miR-451a,ENSMUSG00000051650:mmu-miR-1b-5p,ENSMUSG00000023951:mmu-miR-16-5p,ENSMUSG00000023951:mmu-miR-126a-3p,ENSMUSG00000022762:mmu-miR-25-3p,ENSMUSG00000054611:mmu-miR-19a-3p,ENSMUSG00000024921:mmu-miR-142a-3p…
Biological Process	GO:0030154	cell differentiation	158	6901	7.82647e-20	1.8793e-17	ENSMUSG00000026193:mmu-miR-1a-3p,ENSMUSG00000026193:mmu-miR-140-3p,ENSMUSG00000024921:mmu-miR-142a-3p,ENSMUSG00000022762:mmu-miR-25-3p,ENSMUSG00000051650:mmu-miR-1b-5p,ENSMUSG00000033792:mmu-miR-1b-5p,ENSMUSG00000042292:mmu-miR-1a-3p,ENSMUSG00000030302:mmu-let-7i-5p,ENSMUSG00000022306:mmu-miR-19a-3p,ENSMUSG00000005533:mmu-miR-1a-3p,ENSMUSG00000057446:mmu-let-7i-5p,ENSMUSG00000020838:mmu-miR-16-5p…
Biological Process	GO:0006355	regulation of transcription, DNA-templated	141	5800	1.19295e-19	2.78028e-17	ENSMUSG00000039005:mmu-miR-1b-5p,ENSMUSG00000017652:mmu-miR-16-5p,ENSMUSG00000049791:mmu-miR-19a-3p,ENSMUSG00000020542:mmu-miR-1a-3p,ENSMUSG00000028517:mmu-miR-16-5p,ENSMUSG00000073834:mmu-miR-1a-3p,ENSMUSG00000073834:mmu-let-7i-5p,ENSMUSG00000022528:mmu-miR-1a-3p,ENSMUSG00000048540:mmu-miR-1903,ENSMUSG00000030350:mmu-miR-1b-5p,ENSMUSG00000028736:mmu-miR-1a-3p,ENSMUSG00000037225:mmu-miR-16-5p,ENS…
Biological Process	GO:0010557	positive regulation of macromolecule biosynthetic process	88	2706	2.85465e-19	6.46293e-17	ENSMUSG00000052684:mmu-miR-16-5p,ENSMUSG00000003032:mmu-miR-1a-3p,ENSMUSG00000027210:mmu-let-7i-5p,ENSMUSG00000028890:mmu-miR-1b-5p,ENSMUSG00000026012:mmu-miR-1b-5p,ENSMUSG00000031930:mmu-miR-25-3p,ENSMUSG00000041075:mmu-miR-1a-3p,ENSMUSG00000041075:mmu-miR-126a-3p,ENSMUSG00000030557:mmu-miR-1a-3p,ENSMUSG00000003282:mmu-miR-1b-5p,ENSMUSG00000022952:mmu-miR-126a-3p,ENSMUSG00000041515:mmu-miR-451a,…
Biological Process	GO:0051252	regulation of RNA metabolic process	144	6067	3.55861e-19	7.83289e-17	ENSMUSG00000052155:mmu-miR-1b-5p,ENSMUSG00000032178:mmu-miR-19a-3p,ENSMUSG00000020053:mmu-miR-1a-3p,ENSMUSG00000048482:mmu-miR-1a-3p,ENSMUSG00000002068:mmu-miR-16-5p,ENSMUSG00000046876:mmu-miR-19a-3p,ENSMUSG00000054272:mmu-miR-1b-5p,ENSMUSG00000027951:mmu-miR-1a-3p,ENSMUSG00000035686:mmu-miR-451a,ENSMUSG00000049336:mmu-miR-451a,ENSMUSG00000026434:mmu-miR-451a,ENSMUSG00000066551:mmu-miR-142a-3p,EN…
Biological Process	GO:0097659	nucleic acid-templated transcription	143	6030	5.49915e-19	1.17771e-16	ENSMUSG00000052155:mmu-miR-1b-5p,ENSMUSG00000032178:mmu-miR-19a-3p,ENSMUSG00000020053:mmu-miR-1a-3p,ENSMUSG00000046876:mmu-miR-19a-3p,ENSMUSG00000002068:mmu-miR-16-5p,ENSMUSG00000048482:mmu-miR-1a-3p,ENSMUSG00000054272:mmu-miR-1b-5p,ENSMUSG00000027951:mmu-miR-1a-3p,ENSMUSG00000026434:mmu-miR-451a,ENSMUSG00000035686:mmu-miR-451a,ENSMUSG00000049336:mmu-miR-451a,ENSMUSG00000024401:mmu-miR-19a-3p,ENS…
Biological Process	GO:0032774	RNA biosynthetic process	143	6043	6.68788e-19	1.35884e-16	ENSMUSG00000048482:mmu-miR-1a-3p,ENSMUSG00000002068:mmu-miR-16-5p,ENSMUSG00000046876:mmu-miR-19a-3p,ENSMUSG00000054272:mmu-miR-1b-5p,ENSMUSG00000027951:mmu-miR-1a-3p,ENSMUSG00000052155:mmu-miR-1b-5p,ENSMUSG00000020053:mmu-miR-1a-3p,ENSMUSG00000032178:mmu-miR-19a-3p,ENSMUSG00000066551:mmu-miR-142a-3p,ENSMUSG00000054387:mmu-miR-16-5p,ENSMUSG00000024401:mmu-miR-19a-3p,ENSMUSG00000056493:mmu-miR-1b-5…
Biological Process	GO:0035556	intracellular signal transduction	111	4038	6.62956e-19	1.35884e-16	ENSMUSG00000003032:mmu-miR-1a-3p,ENSMUSG00000026012:mmu-miR-1b-5p,ENSMUSG00000052684:mmu-miR-16-5p,ENSMUSG00000022788:mmu-miR-16-5p,ENSMUSG00000046997:mmu-miR-16-5p,ENSMUSG00000036438:mmu-miR-1a-3p,ENSMUSG00000021549:mmu-miR-1a-3p,ENSMUSG00000042348:mmu-miR-1b-5p,ENSMUSG00000027852:mmu-miR-1b-5p,ENSMUSG00000055204:mmu-miR-451a,ENSMUSG00000060534:mmu-miR-1903,ENSMUSG00000030557:mmu-miR-1a-3p,ENSMU…
Biological Process	GO:0006351	transcription, DNA-templated	142	6010	1.0948e-18	2.1688e-16	ENSMUSG00000002068:mmu-miR-16-5p,ENSMUSG00000046876:mmu-miR-19a-3p,ENSMUSG00000048482:mmu-miR-1a-3p,ENSMUSG00000054272:mmu-miR-1b-5p,ENSMUSG00000027951:mmu-miR-1a-3p,ENSMUSG00000052155:mmu-miR-1b-5p,ENSMUSG00000032178:mmu-miR-19a-3p,ENSMUSG00000020053:mmu-miR-1a-3p,ENSMUSG00000024401:mmu-miR-19a-3p,ENSMUSG00000054387:mmu-miR-16-5p,ENSMUSG00000066551:mmu-miR-142a-3p,ENSMUSG00000056493:mmu-miR-1b-5…
Biological Process	GO:0044700	single organism signaling	203	10368	1.23778e-18	2.39223e-16	ENSMUSG00000033450:mmu-miR-25-3p,ENSMUSG00000022892:mmu-miR-16-5p,ENSMUSG00000022505:mmu-miR-1903,ENSMUSG00000034908:mmu-miR-451a,ENSMUSG00000025860:mmu-miR-451a,ENSMUSG00000019699:mmu-miR-451a,ENSMUSG00000033014:mmu-miR-451a,ENSMUSG00000022346:mmu-miR-451a,ENSMUSG00000028184:mmu-miR-451a,ENSMUSG00000032913:mmu-miR-144-3p,ENSMUSG00000052031:mmu-miR-25-3p,ENSMUSG00000023033:mmu-miR-451a,ENSMUSG000…
Biological Process	GO:0044763	single-organism cellular process	289	17576	1.27851e-18	2.41213e-16	ENSMUSG00000059974:mmu-miR-1903,ENSMUSG00000002111:mmu-miR-126a-3p,ENSMUSG00000042520:mmu-miR-19a-3p,ENSMUSG00000033400:mmu-miR-1903,ENSMUSG00000078673:mmu-miR-1a-3p,ENSMUSG00000040289:mmu-miR-451a,ENSMUSG00000021944:mmu-miR-1a-3p,ENSMUSG00000048540:mmu-miR-1903,ENSMUSG00000039166:mmu-miR-1b-5p,ENSMUSG00000005580:mmu-miR-142a-3p,ENSMUSG00000037259:mmu-miR-1b-5p,ENSMUSG00000039005:mmu-miR-1b-5p,EN…
Biological Process	GO:0023052	signaling	203	10388	1.56184e-18	2.87814e-16	ENSMUSG00000041120:mmu-miR-1903,ENSMUSG00000057123:mmu-miR-144-3p,ENSMUSG00000063626:mmu-miR-1903,ENSMUSG00000021109:mmu-miR-144-3p,ENSMUSG00000024242:mmu-miR-1a-3p,ENSMUSG00000039579:mmu-miR-451a,ENSMUSG00000028136:mmu-miR-19a-3p,ENSMUSG00000028136:mmu-miR-1b-5p,ENSMUSG00000025586:mmu-miR-1a-3p,ENSMUSG00000025586:mmu-miR-25-3p,ENSMUSG00000036112:mmu-miR-1903,ENSMUSG00000040752:mmu-miR-1a-3p,ENSM…
Biological Process	GO:0050794	regulation of cellular process	297	18359	1.93793e-18	3.49004e-16	ENSMUSG00000030201:mmu-miR-19a-3p,ENSMUSG00000068327:mmu-miR-1a-3p,ENSMUSG00000036144:mmu-miR-1a-3p,ENSMUSG00000047888:mmu-miR-1b-5p,ENSMUSG00000003452:mmu-miR-16-5p,ENSMUSG00000038193:mmu-miR-1a-3p,ENSMUSG00000055116:mmu-miR-142a-3p,ENSMUSG00000046020:mmu-miR-1b-5p,ENSMUSG00000060314:mmu-miR-1b-5p,ENSMUSG00000026313:mmu-miR-1a-3p,ENSMUSG00000048285:mmu-miR-1b-5p,ENSMUSG00000026482:mmu-miR-1b-5p,…
Biological Process	GO:1901700	response to oxygen-containing compound	96	3251	3.05992e-18	5.38817e-16	ENSMUSG00000025586:mmu-miR-1a-3p,ENSMUSG00000025586:mmu-miR-25-3p,ENSMUSG00000039579:mmu-miR-451a,ENSMUSG00000039166:mmu-miR-1b-5p,ENSMUSG00000033307:mmu-miR-451a,ENSMUSG00000050953:mmu-miR-1a-3p,ENSMUSG00000015243:mmu-miR-144-3p,ENSMUSG00000039005:mmu-miR-1b-5p,ENSMUSG00000033685:mmu-miR-1a-3p,ENSMUSG00000017652:mmu-miR-16-5p,ENSMUSG00000025980:mmu-miR-1a-3p,ENSMUSG00000049791:mmu-miR-19a-3p,ENS…
Biological Process	GO:0007154	cell communication	204	10531	3.35139e-18	5.77313e-16	ENSMUSG00000000001:mmu-miR-451a,ENSMUSG00000045362:mmu-let-7i-5p,ENSMUSG00000026193:mmu-miR-1a-3p,ENSMUSG00000026193:mmu-miR-140-3p,ENSMUSG00000073563:mmu-miR-1b-5p,ENSMUSG00000025531:mmu-miR-25-3p,ENSMUSG00000059895:mmu-miR-144-3p,ENSMUSG00000042292:mmu-miR-1a-3p,ENSMUSG00000030302:mmu-let-7i-5p,ENSMUSG00000002748:mmu-miR-1903,ENSMUSG00000031483:mmu-miR-16-5p,ENSMUSG00000033792:mmu-miR-1b-5p,ENS…
Biological Process	GO:0009966	regulation of signal transduction	112	4201	4.29868e-18	7.09641e-16	ENSMUSG00000036438:mmu-miR-1a-3p,ENSMUSG00000052684:mmu-miR-16-5p,ENSMUSG00000022788:mmu-miR-16-5p,ENSMUSG00000003032:mmu-miR-1a-3p,ENSMUSG00000026012:mmu-miR-1b-5p,ENSMUSG00000028967:mmu-miR-126a-3p,ENSMUSG00000022285:mmu-miR-451a,ENSMUSG00000017466:mmu-miR-19a-3p,ENSMUSG00000055204:mmu-miR-451a,ENSMUSG00000060534:mmu-miR-1903,ENSMUSG00000019775:mmu-miR-1903,ENSMUSG00000021549:mmu-miR-1a-3p,ENSM…
Biological Process	GO:0019438	aromatic compound biosynthetic process	154	6911	4.22714e-18	7.09641e-16	ENSMUSG00000026313:mmu-miR-1a-3p,ENSMUSG00000096688:mmu-miR-1a-3p,ENSMUSG00000096688:mmu-let-7i-5p,ENSMUSG00000060314:mmu-miR-1b-5p,ENSMUSG00000054611:mmu-miR-19a-3p,ENSMUSG00000023951:mmu-miR-16-5p,ENSMUSG00000023951:mmu-miR-126a-3p,ENSMUSG00000036144:mmu-miR-1a-3p,ENSMUSG00000015605:mmu-miR-1a-3p,ENSMUSG00000030201:mmu-miR-19a-3p,ENSMUSG00000068327:mmu-miR-1a-3p,ENSMUSG00000055116:mmu-miR-142a-…
Biological Process	GO:0048523	negative regulation of cellular process	172	8209	6.64448e-18	1.07451e-15	ENSMUSG00000033014:mmu-miR-451a,ENSMUSG00000039958:mmu-miR-1b-5p,ENSMUSG00000022505:mmu-miR-1903,ENSMUSG00000014074:mmu-miR-16-5p,ENSMUSG00000022892:mmu-miR-16-5p,ENSMUSG00000025860:mmu-miR-451a,ENSMUSG00000038227:mmu-miR-126a-3p,ENSMUSG00000055980:mmu-miR-126a-3p,ENSMUSG00000032913:mmu-miR-144-3p,ENSMUSG00000022346:mmu-miR-451a,ENSMUSG00000000693:mmu-miR-1b-5p,ENSMUSG00000046314:mmu-miR-1b-5p,EN…
Biological Process	GO:0018130	heterocycle biosynthetic process	153	6888	7.88129e-18	1.24903e-15	ENSMUSG00000039005:mmu-miR-1b-5p,ENSMUSG00000005580:mmu-miR-142a-3p,ENSMUSG00000017652:mmu-miR-16-5p,ENSMUSG00000073834:mmu-miR-1a-3p,ENSMUSG00000073834:mmu-let-7i-5p,ENSMUSG00000022528:mmu-miR-1a-3p,ENSMUSG00000049791:mmu-miR-19a-3p,ENSMUSG00000020542:mmu-miR-1a-3p,ENSMUSG00000028517:mmu-miR-16-5p,ENSMUSG00000030350:mmu-miR-1b-5p,ENSMUSG00000048540:mmu-miR-1903,ENSMUSG00000050953:mmu-miR-1a-3p,E…
Biological Process	GO:1901362	organic cyclic compound biosynthetic process	156	7100	8.47808e-18	1.31726e-15	ENSMUSG00000002111:mmu-miR-126a-3p,ENSMUSG00000061665:mmu-miR-142a-3p,ENSMUSG00000032425:mmu-miR-142a-3p,ENSMUSG00000004099:mmu-miR-126a-3p,ENSMUSG00000020364:mmu-miR-1b-5p,ENSMUSG00000021944:mmu-miR-1a-3p,ENSMUSG00000040289:mmu-miR-451a,ENSMUSG00000078673:mmu-miR-1a-3p,ENSMUSG00000050953:mmu-miR-1a-3p,ENSMUSG00000048540:mmu-miR-1903,ENSMUSG00000030350:mmu-miR-1b-5p,ENSMUSG00000015243:mmu-miR-144…
Biological Process	GO:0048513	animal organ development	141	6097	1.03749e-17	1.58097e-15	ENSMUSG00000020542:mmu-miR-1a-3p,ENSMUSG00000049791:mmu-miR-19a-3p,ENSMUSG00000022528:mmu-miR-1a-3p,ENSMUSG00000033685:mmu-miR-1a-3p,ENSMUSG00000028736:mmu-miR-1a-3p,ENSMUSG00000037251:mmu-miR-16-5p,ENSMUSG00000037225:mmu-miR-16-5p,ENSMUSG00000033307:mmu-miR-451a,ENSMUSG00000050953:mmu-miR-1a-3p,ENSMUSG00000021944:mmu-miR-1a-3p,ENSMUSG00000040289:mmu-miR-451a,ENSMUSG00000020364:mmu-miR-1b-5p,ENSM…
Biological Process	GO:0034654	nucleobase-containing compound biosynthetic process	151	6774	1.07767e-17	1.61122e-15	ENSMUSG00000004099:mmu-miR-126a-3p,ENSMUSG00000032425:mmu-miR-142a-3p,ENSMUSG00000002111:mmu-miR-126a-3p,ENSMUSG00000061665:mmu-miR-142a-3p,ENSMUSG00000021944:mmu-miR-1a-3p,ENSMUSG00000040289:mmu-miR-451a,ENSMUSG00000078673:mmu-miR-1a-3p,ENSMUSG00000020364:mmu-miR-1b-5p,ENSMUSG00000015243:mmu-miR-144-3p,ENSMUSG00000028736:mmu-miR-1a-3p,ENSMUSG00000049606:mmu-miR-451a,ENSMUSG00000037225:mmu-miR-16…
Biological Process	GO:0050793	regulation of developmental process	108	4035	1.59769e-17	2.34446e-15	ENSMUSG00000026349:mmu-miR-16-5p,ENSMUSG00000050697:mmu-miR-144-3p,ENSMUSG00000050697:mmu-miR-451a,ENSMUSG00000066551:mmu-miR-142a-3p,ENSMUSG00000024401:mmu-miR-19a-3p,ENSMUSG00000090877:mmu-miR-1a-3p,ENSMUSG00000027164:mmu-miR-144-3p,ENSMUSG00000023206:mmu-miR-1b-5p,ENSMUSG00000024563:mmu-miR-140-3p,ENSMUSG00000028945:mmu-miR-1a-3p,ENSMUSG00000026029:mmu-miR-1b-5p,ENSMUSG00000048251:mmu-miR-16-5…
Biological Process	GO:0010556	regulation of macromolecule biosynthetic process	156	7193	2.90802e-17	4.11485e-15	ENSMUSG00000048251:mmu-miR-16-5p,ENSMUSG00000068457:mmu-miR-1b-5p,ENSMUSG00000031079:mmu-miR-1903,ENSMUSG00000031079:mmu-miR-25-3p,ENSMUSG00000039086:mmu-miR-1b-5p,ENSMUSG00000024563:mmu-miR-140-3p,ENSMUSG00000039661:mmu-miR-1903,ENSMUSG00000090877:mmu-miR-1a-3p,ENSMUSG00000031392:mmu-miR-142a-3p,ENSMUSG00000000902:mmu-miR-1a-3p,ENSMUSG00000027164:mmu-miR-144-3p,ENSMUSG00000020423:mmu-miR-25-3p,E…
Biological Process	GO:0032879	regulation of localization	111	4250	2.88077e-17	4.11485e-15	ENSMUSG00000022285:mmu-miR-451a,ENSMUSG00000030557:mmu-miR-1a-3p,ENSMUSG00000022952:mmu-miR-126a-3p,ENSMUSG00000021549:mmu-miR-1a-3p,ENSMUSG00000062202:mmu-miR-1903,ENSMUSG00000036438:mmu-miR-1a-3p,ENSMUSG00000041075:mmu-miR-1a-3p,ENSMUSG00000041075:mmu-miR-126a-3p,ENSMUSG00000031930:mmu-miR-25-3p,ENSMUSG00000016664:mmu-miR-16-5p,ENSMUSG00000052684:mmu-miR-16-5p,ENSMUSG00000033855:mmu-miR-126a-3p…
Biological Process	GO:0007166	cell surface receptor signaling pathway	102	3718	3.229e-17	4.48887e-15	ENSMUSG00000013663:mmu-miR-19a-3p,ENSMUSG00000013663:mmu-miR-19a-3p,ENSMUSG00000013663:mmu-miR-144-3p,ENSMUSG00000052821:mmu-miR-1b-5p,ENSMUSG00000040289:mmu-miR-451a,ENSMUSG00000089682:mmu-miR-16-5p,ENSMUSG00000021944:mmu-miR-1a-3p,ENSMUSG00000025746:mmu-let-7i-5p,ENSMUSG00000025746:mmu-miR-142a-3p,ENSMUSG00000027276:mmu-miR-16-5p,ENSMUSG00000031555:mmu-miR-126a-3p,ENSMUSG00000090935:mmu-miR-190…
Biological Process	GO:0048583	regulation of response to stimulus	134	5729	4.08796e-17	5.585e-15	ENSMUSG00000026434:mmu-miR-451a,ENSMUSG00000026029:mmu-miR-1b-5p,ENSMUSG00000020099:mmu-miR-1b-5p,ENSMUSG00000066568:mmu-miR-451a,ENSMUSG00000027654:mmu-miR-19a-3p,ENSMUSG00000024401:mmu-miR-19a-3p,ENSMUSG00000054387:mmu-miR-16-5p,ENSMUSG00000066551:mmu-miR-142a-3p,ENSMUSG00000030084:mmu-miR-1b-5p,ENSMUSG00000020053:mmu-miR-1a-3p,ENSMUSG00000057329:mmu-miR-16-5p,ENSMUSG00000020135:mmu-let-7i-5p,E…
Biological Process	GO:0051240	positive regulation of multicellular organismal process	83	2663	4.57632e-17	6.14623e-15	ENSMUSG00000070348:mmu-miR-16-5p,ENSMUSG00000032076:mmu-miR-16-5p,ENSMUSG00000027716:mmu-miR-451a,ENSMUSG00000030525:mmu-miR-19a-3p,ENSMUSG00000050395:mmu-miR-1903,ENSMUSG00000037523:mmu-miR-1b-5p,ENSMUSG00000009900:mmu-miR-16-5p,ENSMUSG00000009555:mmu-miR-1a-3p,ENSMUSG00000006699:mmu-miR-1a-3p,ENSMUSG00000052684:mmu-miR-16-5p,ENSMUSG00000026012:mmu-miR-1b-5p,ENSMUSG00000055204:mmu-miR-451a,ENSMU…
Biological Process	GO:0022008	neurogenesis	86	2833	5.29473e-17	6.99258e-15	ENSMUSG00000060534:mmu-miR-1903,ENSMUSG00000030557:mmu-miR-1a-3p,ENSMUSG00000022952:mmu-miR-126a-3p,ENSMUSG00000027852:mmu-miR-1b-5p,ENSMUSG00000003282:mmu-miR-1b-5p,ENSMUSG00000017466:mmu-miR-19a-3p,ENSMUSG00000052684:mmu-miR-16-5p,ENSMUSG00000003032:mmu-miR-1a-3p,ENSMUSG00000002881:mmu-miR-1903,ENSMUSG00000009900:mmu-miR-16-5p,ENSMUSG00000059921:mmu-miR-144-3p,ENSMUSG00000006699:mmu-miR-1a-3p,E…
Biological Process	GO:2000112	regulation of cellular macromolecule biosynthetic process	153	7052	7.01728e-17	9.11556e-15	ENSMUSG00000033014:mmu-miR-451a,ENSMUSG00000022892:mmu-miR-16-5p,ENSMUSG00000014074:mmu-miR-16-5p,ENSMUSG00000038227:mmu-miR-126a-3p,ENSMUSG00000034673:mmu-miR-1903,ENSMUSG00000055980:mmu-miR-126a-3p,ENSMUSG00000000693:mmu-miR-1b-5p,ENSMUSG00000022346:mmu-miR-451a,ENSMUSG00000031483:mmu-miR-16-5p,ENSMUSG00000002748:mmu-miR-1903,ENSMUSG00000031834:mmu-miR-126a-3p,ENSMUSG00000042292:mmu-miR-1a-3p,E…
Biological Process	GO:0072359	circulatory system development	62	1623	8.49693e-17	1.08596e-14	ENSMUSG00000028086:mmu-miR-25-3p,ENSMUSG00000068457:mmu-miR-1b-5p,ENSMUSG00000030525:mmu-miR-19a-3p,ENSMUSG00000026029:mmu-miR-1b-5p,ENSMUSG00000024563:mmu-miR-140-3p,ENSMUSG00000020099:mmu-miR-1b-5p,ENSMUSG00000041616:mmu-miR-1a-3p,ENSMUSG00000006699:mmu-miR-1a-3p,ENSMUSG00000054387:mmu-miR-16-5p,ENSMUSG00000066551:mmu-miR-142a-3p,ENSMUSG00000029661:mmu-let-7i-5p,ENSMUSG00000009900:mmu-miR-16-5p…
Biological Process	GO:0080090	regulation of primary metabolic process	194	10058	9.00456e-17	1.13257e-14	ENSMUSG00000027490:mmu-miR-1b-5p,ENSMUSG00000017466:mmu-miR-19a-3p,ENSMUSG00000028967:mmu-miR-126a-3p,ENSMUSG00000041515:mmu-miR-451a,ENSMUSG00000062202:mmu-miR-1903,ENSMUSG00000027852:mmu-miR-1b-5p,ENSMUSG00000060534:mmu-miR-1903,ENSMUSG00000030557:mmu-miR-1a-3p,ENSMUSG00000002881:mmu-miR-1903,ENSMUSG00000036438:mmu-miR-1a-3p,ENSMUSG00000027210:mmu-let-7i-5p,ENSMUSG00000063804:mmu-miR-1b-5p,ENSM…
Biological Process	GO:0051171	regulation of nitrogen compound metabolic process	192	9914	9.84371e-17	1.21877e-14	ENSMUSG00000024401:mmu-miR-19a-3p,ENSMUSG00000054387:mmu-miR-16-5p,ENSMUSG00000066551:mmu-miR-142a-3p,ENSMUSG00000066568:mmu-miR-451a,ENSMUSG00000027654:mmu-miR-19a-3p,ENSMUSG00000056493:mmu-miR-1b-5p,ENSMUSG00000026029:mmu-miR-1b-5p,ENSMUSG00000049336:mmu-miR-451a,ENSMUSG00000035686:mmu-miR-451a,ENSMUSG00000026434:mmu-miR-451a,ENSMUSG00000002068:mmu-miR-16-5p,ENSMUSG00000001175:mmu-miR-1a-3p,ENS…
Biological Process	GO:0009889	regulation of biosynthetic process	167	8070	1.01599e-16	1.23857e-14	ENSMUSG00000055204:mmu-miR-451a,ENSMUSG00000003282:mmu-miR-1b-5p,ENSMUSG00000022952:mmu-miR-126a-3p,ENSMUSG00000038766:mmu-miR-1b-5p,ENSMUSG00000052684:mmu-miR-16-5p,ENSMUSG00000003032:mmu-miR-1a-3p,ENSMUSG00000026012:mmu-miR-1b-5p,ENSMUSG00000028890:mmu-miR-1b-5p,ENSMUSG00000026618:mmu-miR-1b-5p,ENSMUSG00000031930:mmu-miR-25-3p,ENSMUSG00000092260:mmu-miR-1b-5p,ENSMUSG00000041075:mmu-miR-1a-3p,EN…
Biological Process	GO:0009605	response to external stimulus	105	3976	1.32802e-16	1.59198e-14	ENSMUSG00000039005:mmu-miR-1b-5p,ENSMUSG00000025980:mmu-miR-1a-3p,ENSMUSG00000041120:mmu-miR-1903,ENSMUSG00000033685:mmu-miR-1a-3p,ENSMUSG00000017652:mmu-miR-16-5p,ENSMUSG00000020542:mmu-miR-1a-3p,ENSMUSG00000073834:mmu-miR-1a-3p,ENSMUSG00000073834:mmu-let-7i-5p,ENSMUSG00000063626:mmu-miR-1903,ENSMUSG00000021109:mmu-miR-144-3p,ENSMUSG00000039579:mmu-miR-451a,ENSMUSG00000033307:mmu-miR-451a,ENSMUS…
Biological Process	GO:2000026	regulation of multicellular organismal development	88	2989	1.34607e-16	1.59198e-14	ENSMUSG00000028717:mmu-miR-126a-3p,ENSMUSG00000090935:mmu-miR-1903,ENSMUSG00000041120:mmu-miR-1903,ENSMUSG00000017652:mmu-miR-16-5p,ENSMUSG00000049791:mmu-miR-19a-3p,ENSMUSG00000020542:mmu-miR-1a-3p,ENSMUSG00000063626:mmu-miR-1903,ENSMUSG00000022528:mmu-miR-1a-3p,ENSMUSG00000021109:mmu-miR-144-3p,ENSMUSG00000033307:mmu-miR-451a,ENSMUSG00000025586:mmu-miR-1a-3p,ENSMUSG00000025586:mmu-miR-25-3p,ENS…
Biological Process	GO:0033993	response to lipid	73	2184	1.37599e-16	1.60344e-14	ENSMUSG00000027164:mmu-miR-144-3p,ENSMUSG00000031392:mmu-miR-142a-3p,ENSMUSG00000022967:mmu-let-7i-5p,ENSMUSG00000024401:mmu-miR-19a-3p,ENSMUSG00000050697:mmu-miR-144-3p,ENSMUSG00000050697:mmu-miR-451a,ENSMUSG00000029661:mmu-let-7i-5p,ENSMUSG00000066551:mmu-miR-142a-3p,ENSMUSG00000026029:mmu-miR-1b-5p,ENSMUSG00000024563:mmu-miR-140-3p,ENSMUSG00000031972:mmu-miR-1a-3p,ENSMUSG00000062908:mmu-miR-19…
Biological Process	GO:0042127	regulation of cell proliferation	84	2780	1.74731e-16	2.00662e-14	ENSMUSG00000026193:mmu-miR-1a-3p,ENSMUSG00000026193:mmu-miR-140-3p,ENSMUSG00000045362:mmu-let-7i-5p,ENSMUSG00000024921:mmu-miR-142a-3p,ENSMUSG00000023951:mmu-miR-16-5p,ENSMUSG00000023951:mmu-miR-126a-3p,ENSMUSG00000033792:mmu-miR-1b-5p,ENSMUSG00000026313:mmu-miR-1a-3p,ENSMUSG00000022306:mmu-miR-19a-3p,ENSMUSG00000005533:mmu-miR-1a-3p,ENSMUSG00000020838:mmu-miR-16-5p,ENSMUSG00000055980:mmu-miR-126…
Biological Process	GO:0007165	signal transduction	187	9594	1.8783e-16	2.12623e-14	ENSMUSG00000090935:mmu-miR-1903,ENSMUSG00000039005:mmu-miR-1b-5p,ENSMUSG00000005580:mmu-miR-142a-3p,ENSMUSG00000017652:mmu-miR-16-5p,ENSMUSG00000025980:mmu-miR-1a-3p,ENSMUSG00000049791:mmu-miR-19a-3p,ENSMUSG00000070867:mmu-miR-1903,ENSMUSG00000016496:mmu-miR-16-5p,ENSMUSG00000028517:mmu-miR-16-5p,ENSMUSG00000020542:mmu-miR-1a-3p,ENSMUSG00000073834:mmu-miR-1a-3p,ENSMUSG00000073834:mmu-let-7i-5p,EN…
Molecular Function	GO:0005515	protein binding	274	16789	3.03016e-16	3.38183e-14	ENSMUSG00000055204:mmu-miR-451a,ENSMUSG00000021549:mmu-miR-1a-3p,ENSMUSG00000016664:mmu-miR-16-5p,ENSMUSG00000031930:mmu-miR-25-3p,ENSMUSG00000041075:mmu-miR-1a-3p,ENSMUSG00000041075:mmu-miR-126a-3p,ENSMUSG00000022788:mmu-miR-16-5p,ENSMUSG00000003032:mmu-miR-1a-3p,ENSMUSG00000026012:mmu-miR-1b-5p,ENSMUSG00000073830:mmu-miR-1a-3p,ENSMUSG00000006699:mmu-miR-1a-3p,ENSMUSG00000027993:mmu-miR-16-5p,EN…
Biological Process	GO:0009888	tissue development	86	2921	3.25125e-16	3.57818e-14	ENSMUSG00000055204:mmu-miR-451a,ENSMUSG00000030557:mmu-miR-1a-3p,ENSMUSG00000022952:mmu-miR-126a-3p,ENSMUSG00000027852:mmu-miR-1b-5p,ENSMUSG00000028967:mmu-miR-126a-3p,ENSMUSG00000052684:mmu-miR-16-5p,ENSMUSG00000003032:mmu-miR-1a-3p,ENSMUSG00000002881:mmu-miR-1903,ENSMUSG00000041075:mmu-miR-1a-3p,ENSMUSG00000041075:mmu-miR-126a-3p,ENSMUSG00000026251:mmu-miR-19a-3p,ENSMUSG00000009900:mmu-miR-16-5…
Biological Process	GO:0031326	regulation of cellular biosynthetic process	163	7903	4.3502e-16	4.72205e-14	ENSMUSG00000028271:mmu-miR-1a-3p,ENSMUSG00000094793:mmu-miR-1a-3p,ENSMUSG00000040943:mmu-miR-19a-3p,ENSMUSG00000034957:mmu-miR-144-3p,ENSMUSG00000006678:mmu-miR-1a-3p,ENSMUSG00000026932:mmu-miR-1b-5p,ENSMUSG00000078619:mmu-miR-1a-3p,ENSMUSG00000027715:mmu-miR-1b-5p,ENSMUSG00000027164:mmu-miR-144-3p,ENSMUSG00000020423:mmu-miR-25-3p,ENSMUSG00000031737:mmu-miR-1a-3p,ENSMUSG00000034563:mmu-miR-1b-5p,…
Biological Process	GO:0010647	positive regulation of cell communication	77	2462	6.56149e-16	7.02612e-14	ENSMUSG00000019699:mmu-miR-451a,ENSMUSG00000030201:mmu-miR-19a-3p,ENSMUSG00000025860:mmu-miR-451a,ENSMUSG00000022505:mmu-miR-1903,ENSMUSG00000055980:mmu-miR-126a-3p,ENSMUSG00000027273:mmu-miR-19a-3p,ENSMUSG00000055116:mmu-miR-142a-3p,ENSMUSG00000038193:mmu-miR-1a-3p,ENSMUSG00000022346:mmu-miR-451a,ENSMUSG00000096688:mmu-miR-1a-3p,ENSMUSG00000096688:mmu-let-7i-5p,ENSMUSG00000005533:mmu-miR-1a-3p,E…
Biological Process	GO:0001944	vasculature development	48	1066	7.995e-16	8.44698e-14	ENSMUSG00000003032:mmu-miR-1a-3p,ENSMUSG00000006678:mmu-miR-1a-3p,ENSMUSG00000052684:mmu-miR-16-5p,ENSMUSG00000027087:mmu-miR-16-5p,ENSMUSG00000021256:mmu-miR-1903,ENSMUSG00000020053:mmu-miR-1a-3p,ENSMUSG00000021549:mmu-miR-1a-3p,ENSMUSG00000022952:mmu-miR-126a-3p,ENSMUSG00000055204:mmu-miR-451a,ENSMUSG00000005958:mmu-miR-1b-5p,ENSMUSG00000027665:mmu-miR-1b-5p,ENSMUSG00000028967:mmu-miR-126a-3p,E…
Biological Process	GO:0032989	cellular component morphogenesis	62	1715	1.09946e-15	1.14633e-13	ENSMUSG00000033540:mmu-miR-16-5p,ENSMUSG00000026380:mmu-miR-1b-5p,ENSMUSG00000009900:mmu-miR-16-5p,ENSMUSG00000066551:mmu-miR-142a-3p,ENSMUSG00000059921:mmu-miR-144-3p,ENSMUSG00000073830:mmu-miR-1a-3p,ENSMUSG00000006699:mmu-miR-1a-3p,ENSMUSG00000020099:mmu-miR-1b-5p,ENSMUSG00000031972:mmu-miR-1a-3p,ENSMUSG00000032076:mmu-miR-16-5p,ENSMUSG00000048251:mmu-miR-16-5p,ENSMUSG00000020193:mmu-miR-25-3p,…
Biological Process	GO:0065008	regulation of biological quality	136	6104	1.19411e-15	1.22884e-13	ENSMUSG00000094793:mmu-miR-1a-3p,ENSMUSG00000040943:mmu-miR-19a-3p,ENSMUSG00000000560:mmu-miR-1b-5p,ENSMUSG00000019647:mmu-miR-142a-3p,ENSMUSG00000039953:mmu-miR-451a,ENSMUSG00000006678:mmu-miR-1a-3p,ENSMUSG00000029104:mmu-miR-1b-5p,ENSMUSG00000027087:mmu-miR-16-5p,ENSMUSG00000034957:mmu-miR-144-3p,ENSMUSG00000050697:mmu-miR-144-3p,ENSMUSG00000050697:mmu-miR-451a,ENSMUSG00000027164:mmu-miR-144-3p…
Biological Process	GO:0009790	embryo development	65	1872	1.38885e-15	1.41093e-13	ENSMUSG00000026193:mmu-miR-1a-3p,ENSMUSG00000026193:mmu-miR-140-3p,ENSMUSG00000023951:mmu-miR-16-5p,ENSMUSG00000023951:mmu-miR-126a-3p,ENSMUSG00000054611:mmu-miR-19a-3p,ENSMUSG00000033792:mmu-miR-1b-5p,ENSMUSG00000030302:mmu-let-7i-5p,ENSMUSG00000022306:mmu-miR-19a-3p,ENSMUSG00000057446:mmu-let-7i-5p,ENSMUSG00000034673:mmu-miR-1903,ENSMUSG00000038193:mmu-miR-1a-3p,ENSMUSG00000022346:mmu-miR-451a,…
Biological Process	GO:0072358	cardiovascular system development	48	1083	1.46135e-15	1.46579e-13	ENSMUSG00000032035:mmu-miR-1a-3p,ENSMUSG00000027276:mmu-miR-16-5p,ENSMUSG00000002111:mmu-miR-126a-3p,ENSMUSG00000038193:mmu-miR-1a-3p,ENSMUSG00000046020:mmu-miR-1b-5p,ENSMUSG00000052821:mmu-miR-1b-5p,ENSMUSG00000021944:mmu-miR-1a-3p,ENSMUSG00000015605:mmu-miR-1a-3p,ENSMUSG00000040289:mmu-miR-451a,ENSMUSG00000036144:mmu-miR-1a-3p,ENSMUSG00000022505:mmu-miR-1903,ENSMUSG00000013663:mmu-miR-19a-3p,EN…
Biological Process	GO:0009967	positive regulation of signal transduction	72	2235	1.53907e-15	1.52444e-13	ENSMUSG00000025860:mmu-miR-451a,ENSMUSG00000022505:mmu-miR-1903,ENSMUSG00000019699:mmu-miR-451a,ENSMUSG00000030201:mmu-miR-19a-3p,ENSMUSG00000055116:mmu-miR-142a-3p,ENSMUSG00000022346:mmu-miR-451a,ENSMUSG00000038193:mmu-miR-1a-3p,ENSMUSG00000055980:mmu-miR-126a-3p,ENSMUSG00000005533:mmu-miR-1a-3p,ENSMUSG00000096688:mmu-miR-1a-3p,ENSMUSG00000096688:mmu-let-7i-5p,ENSMUSG00000023951:mmu-miR-16-5p,EN…
Biological Process	GO:0045595	regulation of cell differentiation	85	2944	1.56133e-15	1.5274e-13	ENSMUSG00000041075:mmu-miR-1a-3p,ENSMUSG00000041075:mmu-miR-126a-3p,ENSMUSG00000052684:mmu-miR-16-5p,ENSMUSG00000027210:mmu-let-7i-5p,ENSMUSG00000003032:mmu-miR-1a-3p,ENSMUSG00000026012:mmu-miR-1b-5p,ENSMUSG00000028967:mmu-miR-126a-3p,ENSMUSG00000027490:mmu-miR-1b-5p,ENSMUSG00000017466:mmu-miR-19a-3p,ENSMUSG00000055204:mmu-miR-451a,ENSMUSG00000030557:mmu-miR-1a-3p,ENSMUSG00000060534:mmu-miR-1903,…
Biological Process	GO:0048699	generation of neurons	79	2627	2.18782e-15	2.11418e-13	ENSMUSG00000037251:mmu-miR-16-5p,ENSMUSG00000054263:mmu-miR-144-3p,ENSMUSG00000028736:mmu-miR-1a-3p,ENSMUSG00000050953:mmu-miR-1a-3p,ENSMUSG00000039579:mmu-miR-451a,ENSMUSG00000025586:mmu-miR-1a-3p,ENSMUSG00000025586:mmu-miR-25-3p,ENSMUSG00000033307:mmu-miR-451a,ENSMUSG00000042448:mmu-miR-1b-5p,ENSMUSG00000063626:mmu-miR-1903,ENSMUSG00000021109:mmu-miR-144-3p,ENSMUSG00000022528:mmu-miR-1a-3p,ENSM…
Biological Process	GO:0023056	positive regulation of signaling	76	2472	2.60873e-15	2.49055e-13	ENSMUSG00000039953:mmu-miR-451a,ENSMUSG00000048482:mmu-miR-1a-3p,ENSMUSG00000001175:mmu-miR-1a-3p,ENSMUSG00000094793:mmu-miR-1a-3p,ENSMUSG00000020053:mmu-miR-1a-3p,ENSMUSG00000027087:mmu-miR-16-5p,ENSMUSG00000052155:mmu-miR-1b-5p,ENSMUSG00000026932:mmu-miR-1b-5p,ENSMUSG00000006678:mmu-miR-1a-3p,ENSMUSG00000029104:mmu-miR-1b-5p,ENSMUSG00000000902:mmu-miR-1a-3p,ENSMUSG00000090877:mmu-miR-1a-3p,ENSM…
Biological Process	GO:0006928	movement of cell or subcellular component	82	2844	5.99064e-15	5.65117e-13	ENSMUSG00000038193:mmu-miR-1a-3p,ENSMUSG00000032913:mmu-miR-144-3p,ENSMUSG00000022346:mmu-miR-451a,ENSMUSG00000055980:mmu-miR-126a-3p,ENSMUSG00000003452:mmu-miR-16-5p,ENSMUSG00000022505:mmu-miR-1903,ENSMUSG00000022892:mmu-miR-16-5p,ENSMUSG00000036144:mmu-miR-1a-3p,ENSMUSG00000015605:mmu-miR-1a-3p,ENSMUSG00000030201:mmu-miR-19a-3p,ENSMUSG00000021756:mmu-miR-142a-3p,ENSMUSG00000029787:mmu-miR-451a,…
Biological Process	GO:0031323	regulation of cellular metabolic process	199	10845	6.33016e-15	5.9012e-13	ENSMUSG00000055980:mmu-miR-126a-3p,ENSMUSG00000034673:mmu-miR-1903,ENSMUSG00000032913:mmu-miR-144-3p,ENSMUSG00000000693:mmu-miR-1b-5p,ENSMUSG00000022346:mmu-miR-451a,ENSMUSG00000033014:mmu-miR-451a,ENSMUSG00000039958:mmu-miR-1b-5p,ENSMUSG00000025860:mmu-miR-451a,ENSMUSG00000038227:mmu-miR-126a-3p,ENSMUSG00000022505:mmu-miR-1903,ENSMUSG00000022892:mmu-miR-16-5p,ENSMUSG00000014074:mmu-miR-16-5p,ENS…
Biological Process	GO:0014070	response to organic cyclic compound	72	2304	7.1731e-15	6.60926e-13	ENSMUSG00000003032:mmu-miR-1a-3p,ENSMUSG00000052684:mmu-miR-16-5p,ENSMUSG00000063804:mmu-miR-1b-5p,ENSMUSG00000026251:mmu-miR-19a-3p,ENSMUSG00000036438:mmu-miR-1a-3p,ENSMUSG00000032788:mmu-miR-1b-5p,ENSMUSG00000028967:mmu-miR-126a-3p,ENSMUSG00000027716:mmu-miR-451a,ENSMUSG00000070348:mmu-miR-16-5p,ENSMUSG00000037523:mmu-miR-1b-5p,ENSMUSG00000078680:mmu-miR-1a-3p,ENSMUSG00000030525:mmu-miR-19a-3p,…
Biological Process	GO:0048519	negative regulation of biological process	184	9708	7.59818e-15	6.92046e-13	ENSMUSG00000068457:mmu-miR-1b-5p,ENSMUSG00000048251:mmu-miR-16-5p,ENSMUSG00000024563:mmu-miR-140-3p,ENSMUSG00000028945:mmu-miR-1a-3p,ENSMUSG00000028495:mmu-miR-1a-3p,ENSMUSG00000039661:mmu-miR-1903,ENSMUSG00000090877:mmu-miR-1a-3p,ENSMUSG00000041616:mmu-miR-1a-3p,ENSMUSG00000031392:mmu-miR-142a-3p,ENSMUSG00000000902:mmu-miR-1a-3p,ENSMUSG00000020423:mmu-miR-25-3p,ENSMUSG00000027164:mmu-miR-144-3p,…
Biological Process	GO:0048468	cell development	99	3879	1.14977e-14	1.03531e-12	ENSMUSG00000028495:mmu-miR-1a-3p,ENSMUSG00000031972:mmu-miR-1a-3p,ENSMUSG00000028945:mmu-miR-1a-3p,ENSMUSG00000020099:mmu-miR-1b-5p,ENSMUSG00000039086:mmu-miR-1b-5p,ENSMUSG00000049336:mmu-miR-451a,ENSMUSG00000020193:mmu-miR-25-3p,ENSMUSG00000048251:mmu-miR-16-5p,ENSMUSG00000024401:mmu-miR-19a-3p,ENSMUSG00000066551:mmu-miR-142a-3p,ENSMUSG00000026380:mmu-miR-1b-5p,ENSMUSG00000023206:mmu-miR-1b-5p,E…
Biological Process	GO:0042325	regulation of phosphorylation	74	2441	1.33711e-14	1.19048e-12	ENSMUSG00000009555:mmu-miR-1a-3p,ENSMUSG00000009900:mmu-miR-16-5p,ENSMUSG00000006699:mmu-miR-1a-3p,ENSMUSG00000030744:mmu-miR-1b-5p,ENSMUSG00000070348:mmu-miR-16-5p,ENSMUSG00000005268:mmu-miR-1903,ENSMUSG00000027351:mmu-miR-144-3p,ENSMUSG00000027351:mmu-miR-126a-3p,ENSMUSG00000030525:mmu-miR-19a-3p,ENSMUSG00000028086:mmu-miR-25-3p,ENSMUSG00000050395:mmu-miR-1903,ENSMUSG00000037523:mmu-miR-1b-5p,E…
Molecular Function	GO:0001071	nucleic acid binding transcription factor activity	64	1917	1.4581e-14	1.26967e-12	ENSMUSG00000024563:mmu-miR-140-3p,ENSMUSG00000048251:mmu-miR-16-5p,ENSMUSG00000031079:mmu-miR-1903,ENSMUSG00000031079:mmu-miR-25-3p,ENSMUSG00000026434:mmu-miR-451a,ENSMUSG00000039086:mmu-miR-1b-5p,ENSMUSG00000026380:mmu-miR-1b-5p,ENSMUSG00000066551:mmu-miR-142a-3p,ENSMUSG00000054387:mmu-miR-16-5p,ENSMUSG00000044647:mmu-miR-1b-5p,ENSMUSG00000044876:mmu-let-7i-5p,ENSMUSG00000056493:mmu-miR-1b-5p,EN…
Molecular Function	GO:0003700	transcription factor activity, sequence-specific DNA binding	64	1917	1.4581e-14	1.26967e-12	ENSMUSG00000037395:mmu-miR-144-3p,ENSMUSG00000033961:mmu-miR-1b-5p,ENSMUSG00000022306:mmu-miR-19a-3p,ENSMUSG00000060314:mmu-miR-1b-5p,ENSMUSG00000042292:mmu-miR-1a-3p,ENSMUSG00000022346:mmu-miR-451a,ENSMUSG00000038193:mmu-miR-1a-3p,ENSMUSG00000055116:mmu-miR-142a-3p,ENSMUSG00000034673:mmu-miR-1903,ENSMUSG00000068327:mmu-miR-1a-3p,ENSMUSG00000015605:mmu-miR-1a-3p,ENSMUSG00000036144:mmu-miR-1a-3p,E…
Biological Process	GO:0007417	central nervous system development	57	1572	1.59384e-14	1.37278e-12	ENSMUSG00000035764:mmu-miR-1b-5p,ENSMUSG00000015709:mmu-miR-451a,ENSMUSG00000032035:mmu-miR-1a-3p,ENSMUSG00000004099:mmu-miR-126a-3p,ENSMUSG00000004872:mmu-miR-1a-3p,ENSMUSG00000022346:mmu-miR-451a,ENSMUSG00000028184:mmu-miR-451a,ENSMUSG00000059974:mmu-miR-1903,ENSMUSG00000045515:mmu-miR-140-3p,ENSMUSG00000017491:mmu-miR-1a-3p,ENSMUSG00000019699:mmu-miR-451a,ENSMUSG00000021756:mmu-miR-142a-3p,ENS…
Biological Process	GO:0008283	cell proliferation	95	3669	1.96085e-14	1.67073e-12	ENSMUSG00000023951:mmu-miR-16-5p,ENSMUSG00000023951:mmu-miR-126a-3p,ENSMUSG00000024921:mmu-miR-142a-3p,ENSMUSG00000045362:mmu-let-7i-5p,ENSMUSG00000026193:mmu-miR-1a-3p,ENSMUSG00000026193:mmu-miR-140-3p,ENSMUSG00000022306:mmu-miR-19a-3p,ENSMUSG00000020838:mmu-miR-16-5p,ENSMUSG00000005533:mmu-miR-1a-3p,ENSMUSG00000026313:mmu-miR-1a-3p,ENSMUSG00000033792:mmu-miR-1b-5p,ENSMUSG00000022346:mmu-miR-451…
Biological Process	GO:0001568	blood vessel development	45	1030	2.00443e-14	1.68969e-12	ENSMUSG00000027087:mmu-miR-16-5p,ENSMUSG00000021256:mmu-miR-1903,ENSMUSG00000006678:mmu-miR-1a-3p,ENSMUSG00000003032:mmu-miR-1a-3p,ENSMUSG00000052684:mmu-miR-16-5p,ENSMUSG00000022952:mmu-miR-126a-3p,ENSMUSG00000021549:mmu-miR-1a-3p,ENSMUSG00000005958:mmu-miR-1b-5p,ENSMUSG00000027665:mmu-miR-1b-5p,ENSMUSG00000055204:mmu-miR-451a,ENSMUSG00000028086:mmu-miR-25-3p,ENSMUSG00000030525:mmu-miR-19a-3p,EN…
Biological Process	GO:0031399	regulation of protein modification process	81	2869	2.84872e-14	2.37613e-12	ENSMUSG00000021944:mmu-miR-1a-3p,ENSMUSG00000020593:mmu-miR-1903,ENSMUSG00000013663:mmu-miR-19a-3p,ENSMUSG00000013663:mmu-miR-19a-3p,ENSMUSG00000013663:mmu-miR-144-3p,ENSMUSG00000025746:mmu-let-7i-5p,ENSMUSG00000025746:mmu-miR-142a-3p,ENSMUSG00000004099:mmu-miR-126a-3p,ENSMUSG00000031555:mmu-miR-126a-3p,ENSMUSG00000058174:mmu-miR-25-3p,ENSMUSG00000029816:mmu-miR-1903,ENSMUSG00000002111:mmu-miR-12…
Biological Process	GO:0040011	locomotion	75	2537	3.1065e-14	2.56416e-12	ENSMUSG00000052684:mmu-miR-16-5p,ENSMUSG00000003032:mmu-miR-1a-3p,ENSMUSG00000060534:mmu-miR-1903,ENSMUSG00000027852:mmu-miR-1b-5p,ENSMUSG00000030223:mmu-miR-1903,ENSMUSG00000038331:mmu-miR-1b-5p,ENSMUSG00000030525:mmu-miR-19a-3p,ENSMUSG00000028086:mmu-miR-25-3p,ENSMUSG00000006699:mmu-miR-1a-3p,ENSMUSG00000020272:mmu-miR-25-3p,ENSMUSG00000009900:mmu-miR-16-5p,ENSMUSG00000059921:mmu-miR-144-3p,ENS…
Biological Process	GO:0009628	response to abiotic stimulus	69	2228	4.45273e-14	3.63747e-12	ENSMUSG00000057329:mmu-miR-16-5p,ENSMUSG00000029104:mmu-miR-1b-5p,ENSMUSG00000027715:mmu-miR-1b-5p,ENSMUSG00000048582:mmu-miR-19a-3p,ENSMUSG00000020053:mmu-miR-1a-3p,ENSMUSG00000046876:mmu-miR-19a-3p,ENSMUSG00000001175:mmu-miR-1a-3p,ENSMUSG00000048482:mmu-miR-1a-3p,ENSMUSG00000062908:mmu-miR-19a-3p,ENSMUSG00000026029:mmu-miR-1b-5p,ENSMUSG00000031972:mmu-miR-1a-3p,ENSMUSG00000026434:mmu-miR-451a,E…
Biological Process	GO:0010243	response to organonitrogen compound	60	1761	4.53986e-14	3.6708e-12	ENSMUSG00000066551:mmu-miR-142a-3p,ENSMUSG00000029661:mmu-let-7i-5p,ENSMUSG00000050697:mmu-miR-144-3p,ENSMUSG00000050697:mmu-miR-451a,ENSMUSG00000024401:mmu-miR-19a-3p,ENSMUSG00000074743:mmu-miR-451a,ENSMUSG00000027712:mmu-miR-1a-3p,ENSMUSG00000031392:mmu-miR-142a-3p,ENSMUSG00000041616:mmu-miR-1a-3p,ENSMUSG00000032113:mmu-miR-1b-5p,ENSMUSG00000020423:mmu-miR-25-3p,ENSMUSG00000070348:mmu-miR-16-5p…
Biological Process	GO:0010033	response to organic substance	131	6056	5.19329e-14	4.15261e-12	ENSMUSG00000054263:mmu-miR-144-3p,ENSMUSG00000040752:mmu-miR-1a-3p,ENSMUSG00000039579:mmu-miR-451a,ENSMUSG00000025586:mmu-miR-1a-3p,ENSMUSG00000025586:mmu-miR-25-3p,ENSMUSG00000024242:mmu-miR-1a-3p,ENSMUSG00000021109:mmu-miR-144-3p,ENSMUSG00000041120:mmu-miR-1903,ENSMUSG00000025746:mmu-let-7i-5p,ENSMUSG00000025746:mmu-miR-142a-3p,ENSMUSG00000027276:mmu-miR-16-5p,ENSMUSG00000032035:mmu-miR-1a-3p,E…
Biological Process	GO:0048514	blood vessel morphogenesis	39	807	5.29295e-14	4.15261e-12	ENSMUSG00000023951:mmu-miR-16-5p,ENSMUSG00000023951:mmu-miR-126a-3p,ENSMUSG00000050953:mmu-miR-1a-3p,ENSMUSG00000026234:mmu-miR-16-5p,ENSMUSG00000026193:mmu-miR-1a-3p,ENSMUSG00000026193:mmu-miR-140-3p,ENSMUSG00000037225:mmu-miR-16-5p,ENSMUSG00000022306:mmu-miR-19a-3p,ENSMUSG00000028717:mmu-miR-126a-3p,ENSMUSG00000090935:mmu-miR-1903,ENSMUSG00000020542:mmu-miR-1a-3p,ENSMUSG00000049791:mmu-miR-19a-…
Molecular Function	GO:0000981	RNA polymerase II transcription factor activity, sequence-specific DNA binding	42	930	5.2423e-14	4.15261e-12	ENSMUSG00000052684:mmu-miR-16-5p,ENSMUSG00000028890:mmu-miR-1b-5p,ENSMUSG00000003032:mmu-miR-1a-3p,ENSMUSG00000027210:mmu-let-7i-5p,ENSMUSG00000026932:mmu-miR-1b-5p,ENSMUSG00000034957:mmu-miR-144-3p,ENSMUSG00000030557:mmu-miR-1a-3p,ENSMUSG00000022952:mmu-miR-126a-3p,ENSMUSG00000003282:mmu-miR-1b-5p,ENSMUSG00000024563:mmu-miR-140-3p,ENSMUSG00000023333:mmu-miR-1903,ENSMUSG00000038331:mmu-miR-1b-5p,…
Biological Process	GO:0006468	protein phosphorylation	84	3085	6.28622e-14	4.88353e-12	ENSMUSG00000006699:mmu-miR-1a-3p,ENSMUSG00000032113:mmu-miR-1b-5p,ENSMUSG00000020272:mmu-miR-25-3p,ENSMUSG00000027784:mmu-miR-451a,ENSMUSG00000009555:mmu-miR-1a-3p,ENSMUSG00000009900:mmu-miR-16-5p,ENSMUSG00000030525:mmu-miR-19a-3p,ENSMUSG00000028086:mmu-miR-25-3p,ENSMUSG00000050395:mmu-miR-1903,ENSMUSG00000040242:mmu-miR-19a-3p,ENSMUSG00000037523:mmu-miR-1b-5p,ENSMUSG00000030744:mmu-miR-1b-5p,ENS…
Molecular Function	GO:0019900	kinase binding	47	1162	8.43525e-14	6.48941e-12	ENSMUSG00000036438:mmu-miR-1a-3p,ENSMUSG00000034957:mmu-miR-144-3p,ENSMUSG00000027087:mmu-miR-16-5p,ENSMUSG00000027715:mmu-miR-1b-5p,ENSMUSG00000029104:mmu-miR-1b-5p,ENSMUSG00000006678:mmu-miR-1a-3p,ENSMUSG00000026012:mmu-miR-1b-5p,ENSMUSG00000028967:mmu-miR-126a-3p,ENSMUSG00000027490:mmu-miR-1b-5p,ENSMUSG00000022285:mmu-miR-451a,ENSMUSG00000030557:mmu-miR-1a-3p,ENSMUSG00000021549:mmu-miR-1a-3p,E…
Biological Process	GO:0065009	regulation of molecular function	109	4638	8.63976e-14	6.58284e-12	ENSMUSG00000023951:mmu-miR-16-5p,ENSMUSG00000023951:mmu-miR-126a-3p,ENSMUSG00000036533:mmu-miR-144-3p,ENSMUSG00000025531:mmu-miR-25-3p,ENSMUSG00000042203:mmu-miR-1b-5p,ENSMUSG00000042845:mmu-miR-1b-5p,ENSMUSG00000026193:mmu-miR-1a-3p,ENSMUSG00000026193:mmu-miR-140-3p,ENSMUSG00000023050:mmu-miR-19a-3p,ENSMUSG00000025266:mmu-let-7i-5p,ENSMUSG00000026482:mmu-miR-1b-5p,ENSMUSG00000005533:mmu-miR-1a-3…
Biological Process	GO:1902533	positive regulation of intracellular signal transduction	55	1541	9.2156e-14	6.95471e-12	ENSMUSG00000017466:mmu-miR-19a-3p,ENSMUSG00000094793:mmu-miR-1a-3p,ENSMUSG00000001175:mmu-miR-1a-3p,ENSMUSG00000060534:mmu-miR-1903,ENSMUSG00000048482:mmu-miR-1a-3p,ENSMUSG00000055204:mmu-miR-451a,ENSMUSG00000027087:mmu-miR-16-5p,ENSMUSG00000036438:mmu-miR-1a-3p,ENSMUSG00000020053:mmu-miR-1a-3p,ENSMUSG00000026012:mmu-miR-1b-5p,ENSMUSG00000029104:mmu-miR-1b-5p,ENSMUSG00000006678:mmu-miR-1a-3p,ENSM…
Biological Process	GO:0019220	regulation of phosphate metabolic process	78	2766	1.01127e-13	7.55968e-12	ENSMUSG00000020053:mmu-miR-1a-3p,ENSMUSG00000027087:mmu-miR-16-5p,ENSMUSG00000034957:mmu-miR-144-3p,ENSMUSG00000027715:mmu-miR-1b-5p,ENSMUSG00000052155:mmu-miR-1b-5p,ENSMUSG00000006678:mmu-miR-1a-3p,ENSMUSG00000057329:mmu-miR-16-5p,ENSMUSG00000009073:mmu-let-7i-5p,ENSMUSG00000027951:mmu-miR-1a-3p,ENSMUSG00000048482:mmu-miR-1a-3p,ENSMUSG00000027665:mmu-miR-1b-5p,ENSMUSG00000002068:mmu-miR-16-5p,EN…
Biological Process	GO:0051174	regulation of phosphorus metabolic process	78	2775	1.19609e-13	8.85777e-12	ENSMUSG00000030201:mmu-miR-19a-3p,ENSMUSG00000022505:mmu-miR-1903,ENSMUSG00000022892:mmu-miR-16-5p,ENSMUSG00000055980:mmu-miR-126a-3p,ENSMUSG00000038193:mmu-miR-1a-3p,ENSMUSG00000022346:mmu-miR-451a,ENSMUSG00000033792:mmu-miR-1b-5p,ENSMUSG00000026313:mmu-miR-1a-3p,ENSMUSG00000031834:mmu-miR-126a-3p,ENSMUSG00000005533:mmu-miR-1a-3p,ENSMUSG00000045362:mmu-let-7i-5p,ENSMUSG00000023050:mmu-miR-19a-3p…
Biological Process	GO:0009887	animal organ morphogenesis	57	1656	1.39498e-13	1.01411e-11	ENSMUSG00000052684:mmu-miR-16-5p,ENSMUSG00000027210:mmu-let-7i-5p,ENSMUSG00000057329:mmu-miR-16-5p,ENSMUSG00000029104:mmu-miR-1b-5p,ENSMUSG00000006678:mmu-miR-1a-3p,ENSMUSG00000002881:mmu-miR-1903,ENSMUSG00000020053:mmu-miR-1a-3p,ENSMUSG00000030084:mmu-miR-1b-5p,ENSMUSG00000027087:mmu-miR-16-5p,ENSMUSG00000040943:mmu-miR-19a-3p,ENSMUSG00000048482:mmu-miR-1a-3p,ENSMUSG00000003282:mmu-miR-1b-5p,ENS…
Biological Process	GO:0048584	positive regulation of response to stimulus	86	3248	1.38972e-13	1.01411e-11	ENSMUSG00000005533:mmu-miR-1a-3p,ENSMUSG00000033792:mmu-miR-1b-5p,ENSMUSG00000096688:mmu-miR-1a-3p,ENSMUSG00000096688:mmu-let-7i-5p,ENSMUSG00000023951:mmu-miR-16-5p,ENSMUSG00000023951:mmu-miR-126a-3p,ENSMUSG00000026193:mmu-miR-1a-3p,ENSMUSG00000026193:mmu-miR-140-3p,ENSMUSG00000045362:mmu-let-7i-5p,ENSMUSG00000023050:mmu-miR-19a-3p,ENSMUSG00000025860:mmu-miR-451a,ENSMUSG00000022505:mmu-miR-1903,E…
Biological Process	GO:0048585	negative regulation of response to stimulus	70	2346	1.68801e-13	1.21598e-11	ENSMUSG00000003452:mmu-miR-16-5p,ENSMUSG00000055980:mmu-miR-126a-3p,ENSMUSG00000022346:mmu-miR-451a,ENSMUSG00000032913:mmu-miR-144-3p,ENSMUSG00000055116:mmu-miR-142a-3p,ENSMUSG00000021756:mmu-miR-142a-3p,ENSMUSG00000030201:mmu-miR-19a-3p,ENSMUSG00000033014:mmu-miR-451a,ENSMUSG00000023951:mmu-miR-16-5p,ENSMUSG00000023951:mmu-miR-126a-3p,ENSMUSG00000096688:mmu-miR-1a-3p,ENSMUSG00000096688:mmu-let-7…
Biological Process	GO:1902531	regulation of intracellular signal transduction	76	2683	1.78858e-13	1.27682e-11	ENSMUSG00000032113:mmu-miR-1b-5p,ENSMUSG00000073830:mmu-miR-1a-3p,ENSMUSG00000006699:mmu-miR-1a-3p,ENSMUSG00000050395:mmu-miR-1903,ENSMUSG00000028086:mmu-miR-25-3p,ENSMUSG00000037523:mmu-miR-1b-5p,ENSMUSG00000030525:mmu-miR-19a-3p,ENSMUSG00000078680:mmu-miR-1a-3p,ENSMUSG00000027351:mmu-miR-144-3p,ENSMUSG00000027351:mmu-miR-126a-3p,ENSMUSG00000030744:mmu-miR-1b-5p,ENSMUSG00000017466:mmu-miR-19a-3p…
Molecular Function	GO:0043565	sequence-specific DNA binding	57	1672	2.07133e-13	1.46547e-11	ENSMUSG00000055116:mmu-miR-142a-3p,ENSMUSG00000053007:mmu-miR-16-5p,ENSMUSG00000061665:mmu-miR-142a-3p,ENSMUSG00000022346:mmu-miR-451a,ENSMUSG00000027104:mmu-miR-1b-5p,ENSMUSG00000027104:mmu-miR-451a,ENSMUSG00000002111:mmu-miR-126a-3p,ENSMUSG00000003847:mmu-miR-1a-3p,ENSMUSG00000038193:mmu-miR-1a-3p,ENSMUSG00000004872:mmu-miR-1a-3p,ENSMUSG00000034673:mmu-miR-1903,ENSMUSG00000004099:mmu-miR-126a-3…
Biological Process	GO:0010648	negative regulation of cell communication	64	2041	2.47181e-13	1.72157e-11	ENSMUSG00000033307:mmu-miR-451a,ENSMUSG00000039005:mmu-miR-1b-5p,ENSMUSG00000090935:mmu-miR-1903,ENSMUSG00000041120:mmu-miR-1903,ENSMUSG00000033685:mmu-miR-1a-3p,ENSMUSG00000073834:mmu-miR-1a-3p,ENSMUSG00000073834:mmu-let-7i-5p,ENSMUSG00000021109:mmu-miR-144-3p,ENSMUSG00000070867:mmu-miR-1903,ENSMUSG00000025746:mmu-let-7i-5p,ENSMUSG00000025746:mmu-miR-142a-3p,ENSMUSG00000013663:mmu-miR-19a-3p,ENS…
Biological Process	GO:0050789	regulation of biological process	303	20238	2.47676e-13	1.72157e-11	ENSMUSG00000013663:mmu-miR-19a-3p,ENSMUSG00000013663:mmu-miR-19a-3p,ENSMUSG00000013663:mmu-miR-144-3p,ENSMUSG00000045515:mmu-miR-140-3p,ENSMUSG00000017491:mmu-miR-1a-3p,ENSMUSG00000089682:mmu-miR-16-5p,ENSMUSG00000003847:mmu-miR-1a-3p,ENSMUSG00000027104:mmu-miR-1b-5p,ENSMUSG00000027104:mmu-miR-451a,ENSMUSG00000031144:mmu-miR-451a,ENSMUSG00000027276:mmu-miR-16-5p,ENSMUSG00000025746:mmu-let-7i-5p,E…
Biological Process	GO:0030182	neuron differentiation	71	2425	2.72598e-13	1.87832e-11	ENSMUSG00000020315:mmu-miR-144-3p,ENSMUSG00000048482:mmu-miR-1a-3p,ENSMUSG00000005958:mmu-miR-1b-5p,ENSMUSG00000019647:mmu-miR-142a-3p,ENSMUSG00000022861:mmu-miR-1903,ENSMUSG00000030084:mmu-miR-1b-5p,ENSMUSG00000057329:mmu-miR-16-5p,ENSMUSG00000006678:mmu-miR-1a-3p,ENSMUSG00000029104:mmu-miR-1b-5p,ENSMUSG00000090877:mmu-miR-1a-3p,ENSMUSG00000031737:mmu-miR-1a-3p,ENSMUSG00000020423:mmu-miR-25-3p,E…
Biological Process	GO:0023057	negative regulation of signaling	64	2047	2.81617e-13	1.92374e-11	ENSMUSG00000024563:mmu-miR-140-3p,ENSMUSG00000020099:mmu-miR-1b-5p,ENSMUSG00000026029:mmu-miR-1b-5p,ENSMUSG00000039661:mmu-miR-1903,ENSMUSG00000090877:mmu-miR-1a-3p,ENSMUSG00000038696:mmu-miR-16-5p,ENSMUSG00000050697:mmu-miR-144-3p,ENSMUSG00000050697:mmu-miR-451a,ENSMUSG00000024401:mmu-miR-19a-3p,ENSMUSG00000020053:mmu-miR-1a-3p,ENSMUSG00000027087:mmu-miR-16-5p,ENSMUSG00000020135:mmu-let-7i-5p,EN…
Biological Process	GO:0014706	striated muscle tissue development	35	691	2.90389e-13	1.9667e-11	ENSMUSG00000026029:mmu-miR-1b-5p,ENSMUSG00000031972:mmu-miR-1a-3p,ENSMUSG00000020423:mmu-miR-25-3p,ENSMUSG00000006699:mmu-miR-1a-3p,ENSMUSG00000041616:mmu-miR-1a-3p,ENSMUSG00000050697:mmu-miR-144-3p,ENSMUSG00000050697:mmu-miR-451a,ENSMUSG00000026349:mmu-miR-16-5p,ENSMUSG00000009900:mmu-miR-16-5p,ENSMUSG00000026251:mmu-miR-19a-3p,ENSMUSG00000020053:mmu-miR-1a-3p,ENSMUSG00000006678:mmu-miR-1a-3p,EN…
Biological Process	GO:0048646	anatomical structure formation involved in morphogenesis	56	1647	3.84179e-13	2.57986e-11	ENSMUSG00000052684:mmu-miR-16-5p,ENSMUSG00000003032:mmu-miR-1a-3p,ENSMUSG00000029104:mmu-miR-1b-5p,ENSMUSG00000006678:mmu-miR-1a-3p,ENSMUSG00000041075:mmu-miR-1a-3p,ENSMUSG00000041075:mmu-miR-126a-3p,ENSMUSG00000021256:mmu-miR-1903,ENSMUSG00000027087:mmu-miR-16-5p,ENSMUSG00000030557:mmu-miR-1a-3p,ENSMUSG00000005958:mmu-miR-1b-5p,ENSMUSG00000027665:mmu-miR-1b-5p,ENSMUSG00000022952:mmu-miR-126a-3p,…
Biological Process	GO:0001932	regulation of protein phosphorylation	67	2224	3.94233e-13	2.62513e-11	ENSMUSG00000009073:mmu-let-7i-5p,ENSMUSG00000027951:mmu-miR-1a-3p,ENSMUSG00000048482:mmu-miR-1a-3p,ENSMUSG00000027665:mmu-miR-1b-5p,ENSMUSG00000002068:mmu-miR-16-5p,ENSMUSG00000001175:mmu-miR-1a-3p,ENSMUSG00000020053:mmu-miR-1a-3p,ENSMUSG00000027087:mmu-miR-16-5p,ENSMUSG00000034957:mmu-miR-144-3p,ENSMUSG00000027715:mmu-miR-1b-5p,ENSMUSG00000052155:mmu-miR-1b-5p,ENSMUSG00000006678:mmu-miR-1a-3p,EN…
Biological Process	GO:0051049	regulation of transport	84	3204	4.88671e-13	3.22686e-11	ENSMUSG00000041616:mmu-miR-1a-3p,ENSMUSG00000090877:mmu-miR-1a-3p,ENSMUSG00000031392:mmu-miR-142a-3p,ENSMUSG00000027164:mmu-miR-144-3p,ENSMUSG00000039678:mmu-miR-1b-5p,ENSMUSG00000066551:mmu-miR-142a-3p,ENSMUSG00000054387:mmu-miR-16-5p,ENSMUSG00000050697:mmu-miR-144-3p,ENSMUSG00000050697:mmu-miR-451a,ENSMUSG00000024401:mmu-miR-19a-3p,ENSMUSG00000022967:mmu-let-7i-5p,ENSMUSG00000025867:mmu-miR-190…
Molecular Function	GO:0008134	transcription factor binding	48	1275	6.09027e-13	3.98838e-11	ENSMUSG00000055116:mmu-miR-142a-3p,ENSMUSG00000002111:mmu-miR-126a-3p,ENSMUSG00000022346:mmu-miR-451a,ENSMUSG00000027104:mmu-miR-1b-5p,ENSMUSG00000027104:mmu-miR-451a,ENSMUSG00000038193:mmu-miR-1a-3p,ENSMUSG00000034673:mmu-miR-1903,ENSMUSG00000032035:mmu-miR-1a-3p,ENSMUSG00000015709:mmu-miR-451a,ENSMUSG00000032589:mmu-miR-144-3p,ENSMUSG00000032589:mmu-miR-1b-5p,ENSMUSG00000020593:mmu-miR-1903,ENS…
Biological Process	GO:0048732	gland development	42	1003	6.33274e-13	4.11317e-11	ENSMUSG00000004872:mmu-miR-1a-3p,ENSMUSG00000055980:mmu-miR-126a-3p,ENSMUSG00000032035:mmu-miR-1a-3p,ENSMUSG00000025746:mmu-let-7i-5p,ENSMUSG00000025746:mmu-miR-142a-3p,ENSMUSG00000022346:mmu-miR-451a,ENSMUSG00000038193:mmu-miR-1a-3p,ENSMUSG00000015605:mmu-miR-1a-3p,ENSMUSG00000030201:mmu-miR-19a-3p,ENSMUSG00000038227:mmu-miR-126a-3p,ENSMUSG00000013663:mmu-miR-19a-3p,ENSMUSG00000013663:mmu-miR-19…
Biological Process	GO:0060255	regulation of macromolecule metabolic process	199	11329	6.64478e-13	4.28075e-11	ENSMUSG00000026234:mmu-miR-16-5p,ENSMUSG00000045362:mmu-let-7i-5p,ENSMUSG00000026193:mmu-miR-1a-3p,ENSMUSG00000026193:mmu-miR-140-3p,ENSMUSG00000037395:mmu-miR-144-3p,ENSMUSG00000024921:mmu-miR-142a-3p,ENSMUSG00000025266:mmu-let-7i-5p,ENSMUSG00000033961:mmu-miR-1b-5p,ENSMUSG00000022306:mmu-miR-19a-3p,ENSMUSG00000005533:mmu-miR-1a-3p,ENSMUSG00000020838:mmu-miR-16-5p,ENSMUSG00000002748:mmu-miR-1903…
Biological Process	GO:0060537	muscle tissue development	35	717	8.34451e-13	5.33241e-11	ENSMUSG00000020053:mmu-miR-1a-3p,ENSMUSG00000026251:mmu-miR-19a-3p,ENSMUSG00000057329:mmu-miR-16-5p,ENSMUSG00000006678:mmu-miR-1a-3p,ENSMUSG00000062908:mmu-miR-19a-3p,ENSMUSG00000048482:mmu-miR-1a-3p,ENSMUSG00000030557:mmu-miR-1a-3p,ENSMUSG00000027852:mmu-miR-1b-5p,ENSMUSG00000031972:mmu-miR-1a-3p,ENSMUSG00000026029:mmu-miR-1b-5p,ENSMUSG00000006699:mmu-miR-1a-3p,ENSMUSG00000041616:mmu-miR-1a-3p,E…
Cellular Component	GO:0044459	plasma membrane part	95	3910	8.57607e-13	5.43654e-11	ENSMUSG00000027479:mmu-miR-144-3p,ENSMUSG00000090877:mmu-miR-1a-3p,ENSMUSG00000022456:mmu-miR-1b-5p,ENSMUSG00000027164:mmu-miR-144-3p,ENSMUSG00000050697:mmu-miR-144-3p,ENSMUSG00000050697:mmu-miR-451a,ENSMUSG00000054537:mmu-miR-1903,ENSMUSG00000032243:mmu-miR-126a-3p,ENSMUSG00000022967:mmu-let-7i-5p,ENSMUSG00000024401:mmu-miR-19a-3p,ENSMUSG00000049336:mmu-miR-451a,ENSMUSG00000000594:mmu-miR-451a,E…
Biological Process	GO:0032501	multicellular organismal process	233	14140	8.85228e-13	5.5671e-11	ENSMUSG00000060314:mmu-miR-1b-5p,ENSMUSG00000096688:mmu-miR-1a-3p,ENSMUSG00000096688:mmu-let-7i-5p,ENSMUSG00000026313:mmu-miR-1a-3p,ENSMUSG00000023951:mmu-miR-16-5p,ENSMUSG00000023951:mmu-miR-126a-3p,ENSMUSG00000054611:mmu-miR-19a-3p,ENSMUSG00000069053:mmu-miR-144-3p,ENSMUSG00000069053:mmu-miR-25-3p,ENSMUSG00000030201:mmu-miR-19a-3p,ENSMUSG00000068327:mmu-miR-1a-3p,ENSMUSG00000028165:mmu-miR-1b-5…
Biological Process	GO:0007267	cell-cell signaling	68	2321	9.2196e-13	5.75245e-11	ENSMUSG00000030302:mmu-let-7i-5p,ENSMUSG00000096688:mmu-miR-1a-3p,ENSMUSG00000096688:mmu-let-7i-5p,ENSMUSG00000020838:mmu-miR-16-5p,ENSMUSG00000073563:mmu-miR-1b-5p,ENSMUSG00000015605:mmu-miR-1a-3p,ENSMUSG00000030201:mmu-miR-19a-3p,ENSMUSG00000021756:mmu-miR-142a-3p,ENSMUSG00000025860:mmu-miR-451a,ENSMUSG00000034908:mmu-miR-451a,ENSMUSG00000047888:mmu-miR-1b-5p,ENSMUSG00000055980:mmu-miR-126a-3p,…
Biological Process	GO:0010468	regulation of gene expression	166	8839	1.12367e-12	6.95624e-11	ENSMUSG00000054272:mmu-miR-1b-5p,ENSMUSG00000027951:mmu-miR-1a-3p,ENSMUSG00000002068:mmu-miR-16-5p,ENSMUSG00000046876:mmu-miR-19a-3p,ENSMUSG00000027665:mmu-miR-1b-5p,ENSMUSG00000048482:mmu-miR-1a-3p,ENSMUSG00000020053:mmu-miR-1a-3p,ENSMUSG00000032178:mmu-miR-19a-3p,ENSMUSG00000057329:mmu-miR-16-5p,ENSMUSG00000052155:mmu-miR-1b-5p,ENSMUSG00000066568:mmu-miR-451a,ENSMUSG00000056493:mmu-miR-1b-5p,EN…
Molecular Function	GO:0000982	transcription factor activity, RNA polymerase II core promoter proximal region sequence-specific binding	30	534	1.15988e-12	7.12473e-11	ENSMUSG00000024563:mmu-miR-140-3p,ENSMUSG00000023333:mmu-miR-1903,ENSMUSG00000048251:mmu-miR-16-5p,ENSMUSG00000026434:mmu-miR-451a,ENSMUSG00000038331:mmu-miR-1b-5p,ENSMUSG00000021109:mmu-miR-144-3p,ENSMUSG00000022528:mmu-miR-1a-3p,ENSMUSG00000020542:mmu-miR-1a-3p,ENSMUSG00000022306:mmu-miR-19a-3p,ENSMUSG00000020423:mmu-miR-25-3p,ENSMUSG00000052684:mmu-miR-16-5p,ENSMUSG00000003032:mmu-miR-1a-3p,EN…
Biological Process	GO:0061061	muscle structure development	43	1070	1.2869e-12	7.84413e-11	ENSMUSG00000041616:mmu-miR-1a-3p,ENSMUSG00000006699:mmu-miR-1a-3p,ENSMUSG00000056493:mmu-miR-1b-5p,ENSMUSG00000020423:mmu-miR-25-3p,ENSMUSG00000066551:mmu-miR-142a-3p,ENSMUSG00000009555:mmu-miR-1a-3p,ENSMUSG00000009900:mmu-miR-16-5p,ENSMUSG00000050697:mmu-miR-144-3p,ENSMUSG00000050697:mmu-miR-451a,ENSMUSG00000026349:mmu-miR-16-5p,ENSMUSG00000024401:mmu-miR-19a-3p,ENSMUSG00000031972:mmu-miR-1a-3p,…
Biological Process	GO:0023014	signal transduction by protein phosphorylation	51	1448	1.31852e-12	7.97556e-11	ENSMUSG00000030744:mmu-miR-1b-5p,ENSMUSG00000027351:mmu-miR-144-3p,ENSMUSG00000027351:mmu-miR-126a-3p,ENSMUSG00000039661:mmu-miR-1903,ENSMUSG00000036707:mmu-miR-144-3p,ENSMUSG00000036707:mmu-miR-451a,ENSMUSG00000030525:mmu-miR-19a-3p,ENSMUSG00000028086:mmu-miR-25-3p,ENSMUSG00000050697:mmu-miR-144-3p,ENSMUSG00000050697:mmu-miR-451a,ENSMUSG00000066551:mmu-miR-142a-3p,ENSMUSG00000024401:mmu-miR-19a-…
Biological Process	GO:0065007	biological regulation	310	21127	1.42454e-12	8.55155e-11	ENSMUSG00000034673:mmu-miR-1903,ENSMUSG00000055980:mmu-miR-126a-3p,ENSMUSG00000027273:mmu-miR-19a-3p,ENSMUSG00000023033:mmu-miR-451a,ENSMUSG00000046314:mmu-miR-1b-5p,ENSMUSG00000032913:mmu-miR-144-3p,ENSMUSG00000022346:mmu-miR-451a,ENSMUSG00000000693:mmu-miR-1b-5p,ENSMUSG00000019699:mmu-miR-451a,ENSMUSG00000039958:mmu-miR-1b-5p,ENSMUSG00000025860:mmu-miR-451a,ENSMUSG00000038227:mmu-miR-126a-3p,EN…
Biological Process	GO:0016477	cell migration	62	2026	1.75084e-12	1.04313e-10	ENSMUSG00000022528:mmu-miR-1a-3p,ENSMUSG00000042292:mmu-miR-1a-3p,ENSMUSG00000021109:mmu-miR-144-3p,ENSMUSG00000063626:mmu-miR-1903,ENSMUSG00000028517:mmu-miR-16-5p,ENSMUSG00000033792:mmu-miR-1b-5p,ENSMUSG00000026313:mmu-miR-1a-3p,ENSMUSG00000016496:mmu-miR-16-5p,ENSMUSG00000041120:mmu-miR-1903,ENSMUSG00000030257:mmu-miR-1b-5p,ENSMUSG00000090935:mmu-miR-1903,ENSMUSG00000005533:mmu-miR-1a-3p,ENSMU…
Biological Process	GO:1901701	cellular response to oxygen-containing compound	61	1980	2.05084e-12	1.21275e-10	ENSMUSG00000026434:mmu-miR-451a,ENSMUSG00000078680:mmu-miR-1a-3p,ENSMUSG00000030744:mmu-miR-1b-5p,ENSMUSG00000000902:mmu-miR-1a-3p,ENSMUSG00000073830:mmu-miR-1a-3p,ENSMUSG00000031392:mmu-miR-142a-3p,ENSMUSG00000027164:mmu-miR-144-3p,ENSMUSG00000029661:mmu-let-7i-5p,ENSMUSG00000050697:mmu-miR-144-3p,ENSMUSG00000050697:mmu-miR-451a,ENSMUSG00000027712:mmu-miR-1a-3p,ENSMUSG00000024401:mmu-miR-19a-3p,…
Molecular Function	GO:0019901	protein kinase binding	42	1050	2.7776e-12	1.63035e-10	ENSMUSG00000028495:mmu-miR-1a-3p,ENSMUSG00000035109:mmu-miR-142a-3p,ENSMUSG00000005268:mmu-miR-1903,ENSMUSG00000027351:mmu-miR-144-3p,ENSMUSG00000027351:mmu-miR-126a-3p,ENSMUSG00000030744:mmu-miR-1b-5p,ENSMUSG00000070348:mmu-miR-16-5p,ENSMUSG00000028945:mmu-miR-1a-3p,ENSMUSG00000037523:mmu-miR-1b-5p,ENSMUSG00000030525:mmu-miR-19a-3p,ENSMUSG00000027712:mmu-miR-1a-3p,ENSMUSG00000009555:mmu-miR-1a-3…
Biological Process	GO:0051094	positive regulation of developmental process	65	2220	3.27443e-12	1.90783e-10	ENSMUSG00000027164:mmu-miR-144-3p,ENSMUSG00000023206:mmu-miR-1b-5p,ENSMUSG00000090877:mmu-miR-1a-3p,ENSMUSG00000024401:mmu-miR-19a-3p,ENSMUSG00000066551:mmu-miR-142a-3p,ENSMUSG00000050697:mmu-miR-144-3p,ENSMUSG00000050697:mmu-miR-451a,ENSMUSG00000039086:mmu-miR-1b-5p,ENSMUSG00000026029:mmu-miR-1b-5p,ENSMUSG00000024563:mmu-miR-140-3p,ENSMUSG00000028945:mmu-miR-1a-3p,ENSMUSG00000039953:mmu-miR-451a…
Biological Process	GO:0051960	regulation of nervous system development	51	1487	3.51456e-12	2.0328e-10	ENSMUSG00000090877:mmu-miR-1a-3p,ENSMUSG00000023206:mmu-miR-1b-5p,ENSMUSG00000009900:mmu-miR-16-5p,ENSMUSG00000066551:mmu-miR-142a-3p,ENSMUSG00000024401:mmu-miR-19a-3p,ENSMUSG00000048251:mmu-miR-16-5p,ENSMUSG00000039086:mmu-miR-1b-5p,ENSMUSG00000028945:mmu-miR-1a-3p,ENSMUSG00000009073:mmu-let-7i-5p,ENSMUSG00000017466:mmu-miR-19a-3p,ENSMUSG00000039953:mmu-miR-451a,ENSMUSG00000019647:mmu-miR-142a-3…
Biological Process	GO:0000122	negative regulation of transcription from RNA polymerase II promoter	47	1297	4.0887e-12	2.34774e-10	ENSMUSG00000020364:mmu-miR-1b-5p,ENSMUSG00000014074:mmu-miR-16-5p,ENSMUSG00000020593:mmu-miR-1903,ENSMUSG00000040289:mmu-miR-451a,ENSMUSG00000015605:mmu-miR-1a-3p,ENSMUSG00000045515:mmu-miR-140-3p,ENSMUSG00000033014:mmu-miR-451a,ENSMUSG00000017491:mmu-miR-1a-3p,ENSMUSG00000061665:mmu-miR-142a-3p,ENSMUSG00000002111:mmu-miR-126a-3p,ENSMUSG00000022346:mmu-miR-451a,ENSMUSG00000027104:mmu-miR-1b-5p,EN…
Biological Process	GO:0044057	regulation of system process	33	678	4.16737e-12	2.3757e-10	ENSMUSG00000028967:mmu-miR-126a-3p,ENSMUSG00000001175:mmu-miR-1a-3p,ENSMUSG00000022952:mmu-miR-126a-3p,ENSMUSG00000030557:mmu-miR-1a-3p,ENSMUSG00000020053:mmu-miR-1a-3p,ENSMUSG00000036438:mmu-miR-1a-3p,ENSMUSG00000003032:mmu-miR-1a-3p,ENSMUSG00000052155:mmu-miR-1b-5p,ENSMUSG00000031737:mmu-miR-1a-3p,ENSMUSG00000090877:mmu-miR-1a-3p,ENSMUSG00000041616:mmu-miR-1a-3p,ENSMUSG00000024401:mmu-miR-19a-3…
Biological Process	GO:0009719	response to endogenous stimulus	74	2748	4.57508e-12	2.5895e-10	ENSMUSG00000021549:mmu-miR-1a-3p,ENSMUSG00000022952:mmu-miR-126a-3p,ENSMUSG00000028967:mmu-miR-126a-3p,ENSMUSG00000027490:mmu-miR-1b-5p,ENSMUSG00000017466:mmu-miR-19a-3p,ENSMUSG00000052684:mmu-miR-16-5p,ENSMUSG00000003032:mmu-miR-1a-3p,ENSMUSG00000032788:mmu-miR-1b-5p,ENSMUSG00000036438:mmu-miR-1a-3p,ENSMUSG00000009900:mmu-miR-16-5p,ENSMUSG00000027712:mmu-miR-1a-3p,ENSMUSG00000032113:mmu-miR-1b-5…
Biological Process	GO:0031324	negative regulation of cellular metabolic process	115	5338	4.81612e-12	2.68753e-10	ENSMUSG00000053886:mmu-miR-1903,ENSMUSG00000002111:mmu-miR-126a-3p,ENSMUSG00000027104:mmu-miR-1b-5p,ENSMUSG00000027104:mmu-miR-451a,ENSMUSG00000061665:mmu-miR-142a-3p,ENSMUSG00000004099:mmu-miR-126a-3p,ENSMUSG00000025746:mmu-let-7i-5p,ENSMUSG00000025746:mmu-miR-142a-3p,ENSMUSG00000058174:mmu-miR-25-3p,ENSMUSG00000004872:mmu-miR-1a-3p,ENSMUSG00000090714:mmu-miR-1b-5p,ENSMUSG00000020593:mmu-miR-190…
Biological Process	GO:0048598	embryonic morphogenesis	38	890	4.78782e-12	2.68753e-10	ENSMUSG00000026193:mmu-miR-1a-3p,ENSMUSG00000026193:mmu-miR-140-3p,ENSMUSG00000050953:mmu-miR-1a-3p,ENSMUSG00000054611:mmu-miR-19a-3p,ENSMUSG00000030302:mmu-let-7i-5p,ENSMUSG00000021109:mmu-miR-144-3p,ENSMUSG00000022528:mmu-miR-1a-3p,ENSMUSG00000057123:mmu-miR-144-3p,ENSMUSG00000033634:mmu-miR-19a-3p,ENSMUSG00000028517:mmu-miR-16-5p,ENSMUSG00000028717:mmu-miR-126a-3p,ENSMUSG00000004872:mmu-miR-1a…
Biological Process	GO:0071310	cellular response to organic substance	99	4290	5.18382e-12	2.87249e-10	ENSMUSG00000050953:mmu-miR-1a-3p,ENSMUSG00000039166:mmu-miR-1b-5p,ENSMUSG00000025586:mmu-miR-1a-3p,ENSMUSG00000025586:mmu-miR-25-3p,ENSMUSG00000033307:mmu-miR-451a,ENSMUSG00000040752:mmu-miR-1a-3p,ENSMUSG00000037225:mmu-miR-16-5p,ENSMUSG00000015243:mmu-miR-144-3p,ENSMUSG00000054263:mmu-miR-144-3p,ENSMUSG00000033685:mmu-miR-1a-3p,ENSMUSG00000041120:mmu-miR-1903,ENSMUSG00000017652:mmu-miR-16-5p,ENS…
Biological Process	GO:0000902	cell morphogenesis	52	1557	5.66971e-12	3.11991e-10	ENSMUSG00000006699:mmu-miR-1a-3p,ENSMUSG00000066551:mmu-miR-142a-3p,ENSMUSG00000033540:mmu-miR-16-5p,ENSMUSG00000026380:mmu-miR-1b-5p,ENSMUSG00000009900:mmu-miR-16-5p,ENSMUSG00000059921:mmu-miR-144-3p,ENSMUSG00000030223:mmu-miR-1903,ENSMUSG00000049336:mmu-miR-451a,ENSMUSG00000048251:mmu-miR-16-5p,ENSMUSG00000039086:mmu-miR-1b-5p,ENSMUSG00000032076:mmu-miR-16-5p,ENSMUSG00000020099:mmu-miR-1b-5p,EN…
Biological Process	GO:0016043	cellular component organization	192	11048	7.70904e-12	4.21286e-10	ENSMUSG00000057329:mmu-miR-16-5p,ENSMUSG00000020135:mmu-let-7i-5p,ENSMUSG00000030084:mmu-miR-1b-5p,ENSMUSG00000020053:mmu-miR-1a-3p,ENSMUSG00000053293:mmu-miR-451a,ENSMUSG00000002068:mmu-miR-16-5p,ENSMUSG00000048482:mmu-miR-1a-3p,ENSMUSG00000005958:mmu-miR-1b-5p,ENSMUSG00000027665:mmu-miR-1b-5p,ENSMUSG00000027951:mmu-miR-1a-3p,ENSMUSG00000054272:mmu-miR-1b-5p,ENSMUSG00000009073:mmu-let-7i-5p,ENSM…
Biological Process	GO:0048870	cell motility	64	2214	8.52837e-12	4.57983e-10	ENSMUSG00000022505:mmu-miR-1903,ENSMUSG00000015605:mmu-miR-1a-3p,ENSMUSG00000036144:mmu-miR-1a-3p,ENSMUSG00000021756:mmu-miR-142a-3p,ENSMUSG00000030201:mmu-miR-19a-3p,ENSMUSG00000022346:mmu-miR-451a,ENSMUSG00000032913:mmu-miR-144-3p,ENSMUSG00000038193:mmu-miR-1a-3p,ENSMUSG00000055980:mmu-miR-126a-3p,ENSMUSG00000030257:mmu-miR-1b-5p,ENSMUSG00000005533:mmu-miR-1a-3p,ENSMUSG00000042292:mmu-miR-1a-3p…
Biological Process	GO:0051172	negative regulation of nitrogen compound metabolic process	103	4587	8.55395e-12	4.57983e-10	ENSMUSG00000090877:mmu-miR-1a-3p,ENSMUSG00000031392:mmu-miR-142a-3p,ENSMUSG00000000902:mmu-miR-1a-3p,ENSMUSG00000056493:mmu-miR-1b-5p,ENSMUSG00000020423:mmu-miR-25-3p,ENSMUSG00000027164:mmu-miR-144-3p,ENSMUSG00000066551:mmu-miR-142a-3p,ENSMUSG00000054387:mmu-miR-16-5p,ENSMUSG00000050697:mmu-miR-144-3p,ENSMUSG00000050697:mmu-miR-451a,ENSMUSG00000026380:mmu-miR-1b-5p,ENSMUSG00000024401:mmu-miR-19a-…
Biological Process	GO:0051674	localization of cell	64	2214	8.52837e-12	4.57983e-10	ENSMUSG00000030223:mmu-miR-1903,ENSMUSG00000038331:mmu-miR-1b-5p,ENSMUSG00000030525:mmu-miR-19a-3p,ENSMUSG00000028086:mmu-miR-25-3p,ENSMUSG00000006699:mmu-miR-1a-3p,ENSMUSG00000020272:mmu-miR-25-3p,ENSMUSG00000059921:mmu-miR-144-3p,ENSMUSG00000027712:mmu-miR-1a-3p,ENSMUSG00000052684:mmu-miR-16-5p,ENSMUSG00000003032:mmu-miR-1a-3p,ENSMUSG00000060534:mmu-miR-1903,ENSMUSG00000027852:mmu-miR-1b-5p,ENS…
Molecular Function	GO:0005102	receptor binding	76	2910	9.72963e-12	5.17434e-10	ENSMUSG00000005533:mmu-miR-1a-3p,ENSMUSG00000096688:mmu-miR-1a-3p,ENSMUSG00000096688:mmu-let-7i-5p,ENSMUSG00000031834:mmu-miR-126a-3p,ENSMUSG00000030302:mmu-let-7i-5p,ENSMUSG00000023951:mmu-miR-16-5p,ENSMUSG00000023951:mmu-miR-126a-3p,ENSMUSG00000026234:mmu-miR-16-5p,ENSMUSG00000000001:mmu-miR-451a,ENSMUSG00000026193:mmu-miR-1a-3p,ENSMUSG00000026193:mmu-miR-140-3p,ENSMUSG00000022505:mmu-miR-1903,…
Biological Process	GO:0051716	cellular response to stimulus	212	12687	9.96388e-12	5.26358e-10	ENSMUSG00000032113:mmu-miR-1b-5p,ENSMUSG00000058793:mmu-miR-1b-5p,ENSMUSG00000006699:mmu-miR-1a-3p,ENSMUSG00000073830:mmu-miR-1a-3p,ENSMUSG00000074743:mmu-miR-451a,ENSMUSG00000027712:mmu-miR-1a-3p,ENSMUSG00000037523:mmu-miR-1b-5p,ENSMUSG00000050395:mmu-miR-1903,ENSMUSG00000038331:mmu-miR-1b-5p,ENSMUSG00000030223:mmu-miR-1903,ENSMUSG00000031293:mmu-miR-1903,ENSMUSG00000035109:mmu-miR-142a-3p,ENSMU…
Biological Process	GO:0044093	positive regulation of molecular function	77	2974	1.05006e-11	5.51041e-10	ENSMUSG00000013663:mmu-miR-19a-3p,ENSMUSG00000013663:mmu-miR-19a-3p,ENSMUSG00000013663:mmu-miR-144-3p,ENSMUSG00000038760:mmu-miR-1b-5p,ENSMUSG00000027104:mmu-miR-1b-5p,ENSMUSG00000027104:mmu-miR-451a,ENSMUSG00000025746:mmu-let-7i-5p,ENSMUSG00000025746:mmu-miR-142a-3p,ENSMUSG00000031555:mmu-miR-126a-3p,ENSMUSG00000017652:mmu-miR-16-5p,ENSMUSG00000025980:mmu-miR-1a-3p,ENSMUSG00000039005:mmu-miR-1b-…
Biological Process	GO:0009612	response to mechanical stimulus	25	404	1.17373e-11	6.11885e-10	ENSMUSG00000048482:mmu-miR-1a-3p,ENSMUSG00000021944:mmu-miR-1a-3p,ENSMUSG00000029104:mmu-miR-1b-5p,ENSMUSG00000025746:mmu-let-7i-5p,ENSMUSG00000025746:mmu-miR-142a-3p,ENSMUSG00000027210:mmu-let-7i-5p,ENSMUSG00000032035:mmu-miR-1a-3p,ENSMUSG00000052684:mmu-miR-16-5p,ENSMUSG00000026915:mmu-miR-1b-5p,ENSMUSG00000022346:mmu-miR-451a,ENSMUSG00000020053:mmu-miR-1a-3p,ENSMUSG00000024401:mmu-miR-19a-3p,E…
Biological Process	GO:0045934	negative regulation of nucleobase-containing compound metabolic process	71	2643	1.50985e-11	7.81965e-10	ENSMUSG00000039661:mmu-miR-1903,ENSMUSG00000024563:mmu-miR-140-3p,ENSMUSG00000049336:mmu-miR-451a,ENSMUSG00000068457:mmu-miR-1b-5p,ENSMUSG00000024401:mmu-miR-19a-3p,ENSMUSG00000066551:mmu-miR-142a-3p,ENSMUSG00000054387:mmu-miR-16-5p,ENSMUSG00000026380:mmu-miR-1b-5p,ENSMUSG00000020423:mmu-miR-25-3p,ENSMUSG00000027164:mmu-miR-144-3p,ENSMUSG00000031392:mmu-miR-142a-3p,ENSMUSG00000056493:mmu-miR-1b-5…
Biological Process	GO:0009792	embryo development ending in birth or egg hatching	45	1252	1.59213e-11	8.18567e-10	ENSMUSG00000030201:mmu-miR-19a-3p,ENSMUSG00000036144:mmu-miR-1a-3p,ENSMUSG00000040289:mmu-miR-451a,ENSMUSG00000021944:mmu-miR-1a-3p,ENSMUSG00000015605:mmu-miR-1a-3p,ENSMUSG00000038227:mmu-miR-126a-3p,ENSMUSG00000015709:mmu-miR-451a,ENSMUSG00000004872:mmu-miR-1a-3p,ENSMUSG00000038193:mmu-miR-1a-3p,ENSMUSG00000022346:mmu-miR-451a,ENSMUSG00000046020:mmu-miR-1b-5p,ENSMUSG00000033792:mmu-miR-1b-5p,ENS…
Molecular Function	GO:0001077	transcriptional activator activity, RNA polymerase II core promoter proximal region sequence-specific binding	24	376	1.60118e-11	8.18567e-10	ENSMUSG00000015605:mmu-miR-1a-3p,ENSMUSG00000030557:mmu-miR-1a-3p,ENSMUSG00000036144:mmu-miR-1a-3p,ENSMUSG00000003282:mmu-miR-1b-5p,ENSMUSG00000053007:mmu-miR-16-5p,ENSMUSG00000055116:mmu-miR-142a-3p,ENSMUSG00000034957:mmu-miR-144-3p,ENSMUSG00000022346:mmu-miR-451a,ENSMUSG00000027104:mmu-miR-1b-5p,ENSMUSG00000027104:mmu-miR-451a,ENSMUSG00000002111:mmu-miR-126a-3p,ENSMUSG00000003847:mmu-miR-1a-3p,…
Biological Process	GO:0051241	negative regulation of multicellular organismal process	55	1760	1.67409e-11	8.50354e-10	ENSMUSG00000037225:mmu-miR-16-5p,ENSMUSG00000026193:mmu-miR-1a-3p,ENSMUSG00000026193:mmu-miR-140-3p,ENSMUSG00000050953:mmu-miR-1a-3p,ENSMUSG00000023951:mmu-miR-16-5p,ENSMUSG00000023951:mmu-miR-126a-3p,ENSMUSG00000057123:mmu-miR-144-3p,ENSMUSG00000022528:mmu-miR-1a-3p,ENSMUSG00000021109:mmu-miR-144-3p,ENSMUSG00000016496:mmu-miR-16-5p,ENSMUSG00000026313:mmu-miR-1a-3p,ENSMUSG00000020542:mmu-miR-1a-3…
Biological Process	GO:0060284	regulation of cell development	52	1608	1.84891e-11	9.33171e-10	ENSMUSG00000009073:mmu-let-7i-5p,ENSMUSG00000017466:mmu-miR-19a-3p,ENSMUSG00000019647:mmu-miR-142a-3p,ENSMUSG00000048482:mmu-miR-1a-3p,ENSMUSG00000060534:mmu-miR-1903,ENSMUSG00000005958:mmu-miR-1b-5p,ENSMUSG00000003282:mmu-miR-1b-5p,ENSMUSG00000046876:mmu-miR-19a-3p,ENSMUSG00000022952:mmu-miR-126a-3p,ENSMUSG00000020053:mmu-miR-1a-3p,ENSMUSG00000030084:mmu-miR-1b-5p,ENSMUSG00000003032:mmu-miR-1a-3…
Biological Process	GO:1901698	response to nitrogen compound	68	2482	1.86346e-11	9.34559e-10	ENSMUSG00000020593:mmu-miR-1903,ENSMUSG00000020364:mmu-miR-1b-5p,ENSMUSG00000013663:mmu-miR-19a-3p,ENSMUSG00000013663:mmu-miR-19a-3p,ENSMUSG00000013663:mmu-miR-144-3p,ENSMUSG00000061665:mmu-miR-142a-3p,ENSMUSG00000004099:mmu-miR-126a-3p,ENSMUSG00000025746:mmu-let-7i-5p,ENSMUSG00000025746:mmu-miR-142a-3p,ENSMUSG00000027276:mmu-miR-16-5p,ENSMUSG00000025980:mmu-miR-1a-3p,ENSMUSG00000017652:mmu-miR-1…
Biological Process	GO:0000165	MAPK cascade	48	1407	1.93743e-11	9.65547e-10	ENSMUSG00000031555:mmu-miR-126a-3p,ENSMUSG00000025746:mmu-let-7i-5p,ENSMUSG00000025746:mmu-miR-142a-3p,ENSMUSG00000029816:mmu-miR-1903,ENSMUSG00000038193:mmu-miR-1a-3p,ENSMUSG00000022346:mmu-miR-451a,ENSMUSG00000021944:mmu-miR-1a-3p,ENSMUSG00000013663:mmu-miR-19a-3p,ENSMUSG00000013663:mmu-miR-19a-3p,ENSMUSG00000013663:mmu-miR-144-3p,ENSMUSG00000037225:mmu-miR-16-5p,ENSMUSG00000023050:mmu-miR-19a-…
Molecular Function	GO:0001228	transcriptional activator activity, RNA polymerase II transcription regulatory region sequence-specific binding	27	487	2.16826e-11	1.07383e-09	ENSMUSG00000044647:mmu-miR-1b-5p,ENSMUSG00000020542:mmu-miR-1a-3p,ENSMUSG00000021109:mmu-miR-144-3p,ENSMUSG00000023333:mmu-miR-1903,ENSMUSG00000024563:mmu-miR-140-3p,ENSMUSG00000038331:mmu-miR-1b-5p,ENSMUSG00000048251:mmu-miR-16-5p,ENSMUSG00000026434:mmu-miR-451a,ENSMUSG00000022952:mmu-miR-126a-3p,ENSMUSG00000003282:mmu-miR-1b-5p,ENSMUSG00000036144:mmu-miR-1a-3p,ENSMUSG00000030557:mmu-miR-1a-3p,E…
Biological Process	GO:0048729	tissue morphogenesis	39	984	2.30091e-11	1.13245e-09	ENSMUSG00000068327:mmu-miR-1a-3p,ENSMUSG00000030201:mmu-miR-19a-3p,ENSMUSG00000040289:mmu-miR-451a,ENSMUSG00000015605:mmu-miR-1a-3p,ENSMUSG00000021944:mmu-miR-1a-3p,ENSMUSG00000038193:mmu-miR-1a-3p,ENSMUSG00000022346:mmu-miR-451a,ENSMUSG00000025746:mmu-let-7i-5p,ENSMUSG00000025746:mmu-miR-142a-3p,ENSMUSG00000027276:mmu-miR-16-5p,ENSMUSG00000004872:mmu-miR-1a-3p,ENSMUSG00000022306:mmu-miR-19a-3p,E…
Biological Process	GO:0046903	secretion	60	2045	2.32377e-11	1.13664e-09	ENSMUSG00000039005:mmu-miR-1b-5p,ENSMUSG00000033685:mmu-miR-1a-3p,ENSMUSG00000025980:mmu-miR-1a-3p,ENSMUSG00000020838:mmu-miR-16-5p,ENSMUSG00000017652:mmu-miR-16-5p,ENSMUSG00000073834:mmu-miR-1a-3p,ENSMUSG00000073834:mmu-let-7i-5p,ENSMUSG00000057123:mmu-miR-144-3p,ENSMUSG00000030302:mmu-let-7i-5p,ENSMUSG00000021109:mmu-miR-144-3p,ENSMUSG00000016496:mmu-miR-16-5p,ENSMUSG00000049791:mmu-miR-19a-3p,…
Biological Process	GO:0019222	regulation of metabolic process	209	12564	2.73061e-11	1.32744e-09	ENSMUSG00000027715:mmu-miR-1b-5p,ENSMUSG00000006678:mmu-miR-1a-3p,ENSMUSG00000029104:mmu-miR-1b-5p,ENSMUSG00000026932:mmu-miR-1b-5p,ENSMUSG00000078619:mmu-miR-1a-3p,ENSMUSG00000025081:mmu-miR-1b-5p,ENSMUSG00000027087:mmu-miR-16-5p,ENSMUSG00000021256:mmu-miR-1903,ENSMUSG00000034957:mmu-miR-144-3p,ENSMUSG00000040943:mmu-miR-19a-3p,ENSMUSG00000094793:mmu-miR-1a-3p,ENSMUSG00000028271:mmu-miR-1a-3p,EN…
Biological Process	GO:0006464	cellular protein modification process	136	6957	2.79835e-11	1.33579e-09	ENSMUSG00000001175:mmu-miR-1a-3p,ENSMUSG00000002068:mmu-miR-16-5p,ENSMUSG00000005958:mmu-miR-1b-5p,ENSMUSG00000048482:mmu-miR-1a-3p,ENSMUSG00000027665:mmu-miR-1b-5p,ENSMUSG00000027951:mmu-miR-1a-3p,ENSMUSG00000009073:mmu-let-7i-5p,ENSMUSG00000020315:mmu-miR-144-3p,ENSMUSG00000057329:mmu-miR-16-5p,ENSMUSG00000052155:mmu-miR-1b-5p,ENSMUSG00000020053:mmu-miR-1a-3p,ENSMUSG00000032178:mmu-miR-19a-3p,E…
Biological Process	GO:0036211	protein modification process	136	6957	2.79835e-11	1.33579e-09	ENSMUSG00000055204:mmu-miR-451a,ENSMUSG00000021549:mmu-miR-1a-3p,ENSMUSG00000041075:mmu-miR-1a-3p,ENSMUSG00000041075:mmu-miR-126a-3p,ENSMUSG00000031930:mmu-miR-25-3p,ENSMUSG00000052684:mmu-miR-16-5p,ENSMUSG00000022788:mmu-miR-16-5p,ENSMUSG00000003032:mmu-miR-1a-3p,ENSMUSG00000006699:mmu-miR-1a-3p,ENSMUSG00000027993:mmu-miR-16-5p,ENSMUSG00000024384:mmu-miR-1b-5p,ENSMUSG00000032113:mmu-miR-1b-5p,EN…
Biological Process	GO:0042592	homeostatic process	75	2915	2.77236e-11	1.33579e-09	ENSMUSG00000028717:mmu-miR-126a-3p,ENSMUSG00000017652:mmu-miR-16-5p,ENSMUSG00000033685:mmu-miR-1a-3p,ENSMUSG00000039005:mmu-miR-1b-5p,ENSMUSG00000021109:mmu-miR-144-3p,ENSMUSG00000012428:mmu-miR-1903,ENSMUSG00000073834:mmu-miR-1a-3p,ENSMUSG00000073834:mmu-let-7i-5p,ENSMUSG00000057123:mmu-miR-144-3p,ENSMUSG00000033307:mmu-miR-451a,ENSMUSG00000050953:mmu-miR-1a-3p,ENSMUSG00000015243:mmu-miR-144-3p,…
Biological Process	GO:0043412	macromolecule modification	141	7319	2.83921e-11	1.34718e-09	ENSMUSG00000054611:mmu-miR-19a-3p,ENSMUSG00000023951:mmu-miR-16-5p,ENSMUSG00000023951:mmu-miR-126a-3p,ENSMUSG00000023050:mmu-miR-19a-3p,ENSMUSG00000026313:mmu-miR-1a-3p,ENSMUSG00000046020:mmu-miR-1b-5p,ENSMUSG00000013878:mmu-miR-1a-3p,ENSMUSG00000036745:mmu-miR-1903,ENSMUSG00000038193:mmu-miR-1a-3p,ENSMUSG00000069053:mmu-miR-144-3p,ENSMUSG00000069053:mmu-miR-25-3p,ENSMUSG00000030201:mmu-miR-19a-3…
Biological Process	GO:0031401	positive regulation of protein modification process	58	1948	2.95763e-11	1.39501e-09	ENSMUSG00000038193:mmu-miR-1a-3p,ENSMUSG00000029816:mmu-miR-1903,ENSMUSG00000031555:mmu-miR-126a-3p,ENSMUSG00000004099:mmu-miR-126a-3p,ENSMUSG00000025746:mmu-let-7i-5p,ENSMUSG00000025746:mmu-miR-142a-3p,ENSMUSG00000025860:mmu-miR-451a,ENSMUSG00000013663:mmu-miR-19a-3p,ENSMUSG00000013663:mmu-miR-19a-3p,ENSMUSG00000013663:mmu-miR-144-3p,ENSMUSG00000020593:mmu-miR-1903,ENSMUSG00000022505:mmu-miR-190…
Biological Process	GO:0008284	positive regulation of cell proliferation	55	1792	3.30388e-11	1.54911e-09	ENSMUSG00000022306:mmu-miR-19a-3p,ENSMUSG00000017652:mmu-miR-16-5p,ENSMUSG00000039005:mmu-miR-1b-5p,ENSMUSG00000005533:mmu-miR-1a-3p,ENSMUSG00000020542:mmu-miR-1a-3p,ENSMUSG00000033792:mmu-miR-1b-5p,ENSMUSG00000026313:mmu-miR-1a-3p,ENSMUSG00000016496:mmu-miR-16-5p,ENSMUSG00000021109:mmu-miR-144-3p,ENSMUSG00000022528:mmu-miR-1a-3p,ENSMUSG00000023951:mmu-miR-16-5p,ENSMUSG00000023951:mmu-miR-126a-3p…
Molecular Function	GO:0003677	DNA binding	88	3728	3.48402e-11	1.62396e-09	ENSMUSG00000061665:mmu-miR-142a-3p,ENSMUSG00000053007:mmu-miR-16-5p,ENSMUSG00000003847:mmu-miR-1a-3p,ENSMUSG00000002111:mmu-miR-126a-3p,ENSMUSG00000027104:mmu-miR-1b-5p,ENSMUSG00000027104:mmu-miR-451a,ENSMUSG00000090714:mmu-miR-1b-5p,ENSMUSG00000004872:mmu-miR-1a-3p,ENSMUSG00000004099:mmu-miR-126a-3p,ENSMUSG00000015709:mmu-miR-451a,ENSMUSG00000032035:mmu-miR-1a-3p,ENSMUSG00000020364:mmu-miR-1b-5p…
Biological Process	GO:0043009	chordate embryonic development	44	1238	3.90615e-11	1.81008e-09	ENSMUSG00000057446:mmu-let-7i-5p,ENSMUSG00000022306:mmu-miR-19a-3p,ENSMUSG00000021109:mmu-miR-144-3p,ENSMUSG00000022528:mmu-miR-1a-3p,ENSMUSG00000042448:mmu-miR-1b-5p,ENSMUSG00000033792:mmu-miR-1b-5p,ENSMUSG00000050953:mmu-miR-1a-3p,ENSMUSG00000054611:mmu-miR-19a-3p,ENSMUSG00000023951:mmu-miR-16-5p,ENSMUSG00000023951:mmu-miR-126a-3p,ENSMUSG00000040752:mmu-miR-1a-3p,ENSMUSG00000028736:mmu-miR-1a-3…
Molecular Function	GO:0005488	binding	337	24250	4.20624e-11	1.93781e-09	ENSMUSG00000027276:mmu-miR-16-5p,ENSMUSG00000025746:mmu-let-7i-5p,ENSMUSG00000025746:mmu-miR-142a-3p,ENSMUSG00000021257:mmu-miR-16-5p,ENSMUSG00000004872:mmu-miR-1a-3p,ENSMUSG00000031555:mmu-miR-126a-3p,ENSMUSG00000027104:mmu-miR-1b-5p,ENSMUSG00000027104:mmu-miR-451a,ENSMUSG00000003847:mmu-miR-1a-3p,ENSMUSG00000031144:mmu-miR-451a,ENSMUSG00000017491:mmu-miR-1a-3p,ENSMUSG00000045515:mmu-miR-140-3p,…
Biological Process	GO:0009725	response to hormone	53	1700	4.4455e-11	2.02759e-09	ENSMUSG00000002068:mmu-miR-16-5p,ENSMUSG00000021549:mmu-miR-1a-3p,ENSMUSG00000001175:mmu-miR-1a-3p,ENSMUSG00000048482:mmu-miR-1a-3p,ENSMUSG00000027665:mmu-miR-1b-5p,ENSMUSG00000017466:mmu-miR-19a-3p,ENSMUSG00000028967:mmu-miR-126a-3p,ENSMUSG00000062908:mmu-miR-19a-3p,ENSMUSG00000057329:mmu-miR-16-5p,ENSMUSG00000052684:mmu-miR-16-5p,ENSMUSG00000027715:mmu-miR-1b-5p,ENSMUSG00000034957:mmu-miR-144-3…
Biological Process	GO:0060429	epithelium development	54	1753	4.45231e-11	2.02759e-09	ENSMUSG00000050953:mmu-miR-1a-3p,ENSMUSG00000054611:mmu-miR-19a-3p,ENSMUSG00000023951:mmu-miR-16-5p,ENSMUSG00000023951:mmu-miR-126a-3p,ENSMUSG00000033307:mmu-miR-451a,ENSMUSG00000037225:mmu-miR-16-5p,ENSMUSG00000028736:mmu-miR-1a-3p,ENSMUSG00000005533:mmu-miR-1a-3p,ENSMUSG00000022528:mmu-miR-1a-3p,ENSMUSG00000030302:mmu-let-7i-5p,ENSMUSG00000021109:mmu-miR-144-3p,ENSMUSG00000048285:mmu-miR-1b-5p,…
Biological Process	GO:0003151	outflow tract morphogenesis	13	92	4.70536e-11	2.13059e-09	ENSMUSG00000022306:mmu-miR-19a-3p,ENSMUSG00000017491:mmu-miR-1a-3p,ENSMUSG00000030201:mmu-miR-19a-3p,ENSMUSG00000040289:mmu-miR-451a,ENSMUSG00000057123:mmu-miR-144-3p,ENSMUSG00000021109:mmu-miR-144-3p,ENSMUSG00000022528:mmu-miR-1a-3p,ENSMUSG00000021944:mmu-miR-1a-3p,ENSMUSG00000038193:mmu-miR-1a-3p,ENSMUSG00000027104:mmu-miR-1b-5p,ENSMUSG00000027104:mmu-miR-451a,ENSMUSG00000023951:mmu-miR-16-5p,E…
Biological Process	GO:0042221	response to chemical	161	8873	5.67267e-11	2.55373e-09	ENSMUSG00000015605:mmu-miR-1a-3p,ENSMUSG00000030201:mmu-miR-19a-3p,ENSMUSG00000021756:mmu-miR-142a-3p,ENSMUSG00000055116:mmu-miR-142a-3p,ENSMUSG00000038193:mmu-miR-1a-3p,ENSMUSG00000003452:mmu-miR-16-5p,ENSMUSG00000026313:mmu-miR-1a-3p,ENSMUSG00000096688:mmu-miR-1a-3p,ENSMUSG00000096688:mmu-let-7i-5p,ENSMUSG00000023951:mmu-miR-16-5p,ENSMUSG00000023951:mmu-miR-126a-3p,ENSMUSG00000020315:mmu-miR-14…
Biological Process	GO:0050896	response to stimulus	242	15425	5.70432e-11	2.55373e-09	ENSMUSG00000035764:mmu-miR-1b-5p,ENSMUSG00000032035:mmu-miR-1a-3p,ENSMUSG00000015709:mmu-miR-451a,ENSMUSG00000025746:mmu-let-7i-5p,ENSMUSG00000025746:mmu-miR-142a-3p,ENSMUSG00000027276:mmu-miR-16-5p,ENSMUSG00000058174:mmu-miR-25-3p,ENSMUSG00000031555:mmu-miR-126a-3p,ENSMUSG00000027104:mmu-miR-1b-5p,ENSMUSG00000027104:mmu-miR-451a,ENSMUSG00000029816:mmu-miR-1903,ENSMUSG00000003847:mmu-miR-1a-3p,EN…
Biological Process	GO:0008285	negative regulation of cell proliferation	37	928	6.51633e-11	2.90087e-09	ENSMUSG00000013663:mmu-miR-19a-3p,ENSMUSG00000013663:mmu-miR-19a-3p,ENSMUSG00000013663:mmu-miR-144-3p,ENSMUSG00000017491:mmu-miR-1a-3p,ENSMUSG00000030201:mmu-miR-19a-3p,ENSMUSG00000015605:mmu-miR-1a-3p,ENSMUSG00000022346:mmu-miR-451a,ENSMUSG00000027104:mmu-miR-1b-5p,ENSMUSG00000027104:mmu-miR-451a,ENSMUSG00000029816:mmu-miR-1903,ENSMUSG00000032035:mmu-miR-1a-3p,ENSMUSG00000025746:mmu-let-7i-5p,EN…
Biological Process	GO:0001525	angiogenesis	31	673	7.53071e-11	3.33371e-09	ENSMUSG00000027087:mmu-miR-16-5p,ENSMUSG00000038193:mmu-miR-1a-3p,ENSMUSG00000021256:mmu-miR-1903,ENSMUSG00000046020:mmu-miR-1b-5p,ENSMUSG00000032035:mmu-miR-1a-3p,ENSMUSG00000003032:mmu-miR-1a-3p,ENSMUSG00000052684:mmu-miR-16-5p,ENSMUSG00000022505:mmu-miR-1903,ENSMUSG00000013663:mmu-miR-19a-3p,ENSMUSG00000013663:mmu-miR-19a-3p,ENSMUSG00000013663:mmu-miR-144-3p,ENSMUSG00000022952:mmu-miR-126a-3p,…
Biological Process	GO:0042327	positive regulation of phosphorylation	51	1626	8.69922e-11	3.82959e-09	ENSMUSG00000070348:mmu-miR-16-5p,ENSMUSG00000030744:mmu-miR-1b-5p,ENSMUSG00000005268:mmu-miR-1903,ENSMUSG00000030525:mmu-miR-19a-3p,ENSMUSG00000036707:mmu-miR-144-3p,ENSMUSG00000036707:mmu-miR-451a,ENSMUSG00000050395:mmu-miR-1903,ENSMUSG00000037523:mmu-miR-1b-5p,ENSMUSG00000028086:mmu-miR-25-3p,ENSMUSG00000050697:mmu-miR-144-3p,ENSMUSG00000050697:mmu-miR-451a,ENSMUSG00000009900:mmu-miR-16-5p,ENSM…
Biological Process	GO:0045892	negative regulation of transcription, DNA-templated	62	2232	9.60221e-11	4.20375e-09	ENSMUSG00000017491:mmu-miR-1a-3p,ENSMUSG00000045515:mmu-miR-140-3p,ENSMUSG00000033014:mmu-miR-451a,ENSMUSG00000015605:mmu-miR-1a-3p,ENSMUSG00000078673:mmu-miR-1a-3p,ENSMUSG00000040289:mmu-miR-451a,ENSMUSG00000020593:mmu-miR-1903,ENSMUSG00000014074:mmu-miR-16-5p,ENSMUSG00000020364:mmu-miR-1b-5p,ENSMUSG00000004099:mmu-miR-126a-3p,ENSMUSG00000004872:mmu-miR-1a-3p,ENSMUSG00000002111:mmu-miR-126a-3p,E…
Biological Process	GO:0010562	positive regulation of phosphorus metabolic process	54	1793	1.01891e-10	4.41192e-09	ENSMUSG00000029816:mmu-miR-1903,ENSMUSG00000038193:mmu-miR-1a-3p,ENSMUSG00000022346:mmu-miR-451a,ENSMUSG00000025746:mmu-let-7i-5p,ENSMUSG00000025746:mmu-miR-142a-3p,ENSMUSG00000055980:mmu-miR-126a-3p,ENSMUSG00000031555:mmu-miR-126a-3p,ENSMUSG00000022505:mmu-miR-1903,ENSMUSG00000013663:mmu-miR-19a-3p,ENSMUSG00000013663:mmu-miR-19a-3p,ENSMUSG00000013663:mmu-miR-144-3p,ENSMUSG00000021944:mmu-miR-1a-…
Biological Process	GO:0045937	positive regulation of phosphate metabolic process	54	1793	1.01891e-10	4.41192e-09	ENSMUSG00000005268:mmu-miR-1903,ENSMUSG00000039661:mmu-miR-1903,ENSMUSG00000030744:mmu-miR-1b-5p,ENSMUSG00000070348:mmu-miR-16-5p,ENSMUSG00000028086:mmu-miR-25-3p,ENSMUSG00000050395:mmu-miR-1903,ENSMUSG00000037523:mmu-miR-1b-5p,ENSMUSG00000030525:mmu-miR-19a-3p,ENSMUSG00000036707:mmu-miR-144-3p,ENSMUSG00000036707:mmu-miR-451a,ENSMUSG00000024401:mmu-miR-19a-3p,ENSMUSG00000009555:mmu-miR-1a-3p,ENSM…
Biological Process	GO:0010558	negative regulation of macromolecule biosynthetic process	76	3078	1.3618e-10	5.84081e-09	ENSMUSG00000025266:mmu-let-7i-5p,ENSMUSG00000037395:mmu-miR-144-3p,ENSMUSG00000024921:mmu-miR-142a-3p,ENSMUSG00000023951:mmu-miR-16-5p,ENSMUSG00000023951:mmu-miR-126a-3p,ENSMUSG00000026313:mmu-miR-1a-3p,ENSMUSG00000060314:mmu-miR-1b-5p,ENSMUSG00000096688:mmu-miR-1a-3p,ENSMUSG00000096688:mmu-let-7i-5p,ENSMUSG00000022306:mmu-miR-19a-3p,ENSMUSG00000055116:mmu-miR-142a-3p,ENSMUSG00000000693:mmu-miR-1…
Biological Process	GO:0048738	cardiac muscle tissue development	21	315	1.36364e-10	5.84081e-09	ENSMUSG00000040289:mmu-miR-451a,ENSMUSG00000030557:mmu-miR-1a-3p,ENSMUSG00000021944:mmu-miR-1a-3p,ENSMUSG00000015605:mmu-miR-1a-3p,ENSMUSG00000030201:mmu-miR-19a-3p,ENSMUSG00000017491:mmu-miR-1a-3p,ENSMUSG00000062908:mmu-miR-19a-3p,ENSMUSG00000013663:mmu-miR-19a-3p,ENSMUSG00000013663:mmu-miR-19a-3p,ENSMUSG00000013663:mmu-miR-144-3p,ENSMUSG00000004872:mmu-miR-1a-3p,ENSMUSG00000020053:mmu-miR-1a-3p…
Biological Process	GO:0051179	localization	181	10529	1.52285e-10	6.48767e-09	ENSMUSG00000041075:mmu-miR-1a-3p,ENSMUSG00000041075:mmu-miR-126a-3p,ENSMUSG00000016664:mmu-miR-16-5p,ENSMUSG00000031930:mmu-miR-25-3p,ENSMUSG00000003032:mmu-miR-1a-3p,ENSMUSG00000052684:mmu-miR-16-5p,ENSMUSG00000033855:mmu-miR-126a-3p,ENSMUSG00000022952:mmu-miR-126a-3p,ENSMUSG00000021549:mmu-miR-1a-3p,ENSMUSG00000050395:mmu-miR-1903,ENSMUSG00000037523:mmu-miR-1b-5p,ENSMUSG00000038331:mmu-miR-1b-5…
Biological Process	GO:0048878	chemical homeostasis	54	1814	1.55593e-10	6.59314e-09	ENSMUSG00000050953:mmu-miR-1a-3p,ENSMUSG00000023951:mmu-miR-16-5p,ENSMUSG00000023951:mmu-miR-126a-3p,ENSMUSG00000037225:mmu-miR-16-5p,ENSMUSG00000015243:mmu-miR-144-3p,ENSMUSG00000026193:mmu-miR-1a-3p,ENSMUSG00000026193:mmu-miR-140-3p,ENSMUSG00000017652:mmu-miR-16-5p,ENSMUSG00000033685:mmu-miR-1a-3p,ENSMUSG00000005533:mmu-miR-1a-3p,ENSMUSG00000030302:mmu-let-7i-5p,ENSMUSG00000021109:mmu-miR-144-3…
Biological Process	GO:0043491	protein kinase B signaling	19	255	1.59518e-10	6.72349e-09	ENSMUSG00000073834:mmu-miR-1a-3p,ENSMUSG00000073834:mmu-let-7i-5p,ENSMUSG00000096688:mmu-miR-1a-3p,ENSMUSG00000096688:mmu-let-7i-5p,ENSMUSG00000024401:mmu-miR-19a-3p,ENSMUSG00000017652:mmu-miR-16-5p,ENSMUSG00000073830:mmu-miR-1a-3p,ENSMUSG00000005533:mmu-miR-1a-3p,ENSMUSG00000037225:mmu-miR-16-5p,ENSMUSG00000078680:mmu-miR-1a-3p,ENSMUSG00000023951:mmu-miR-16-5p,ENSMUSG00000023951:mmu-miR-126a-3p,…
Biological Process	GO:0016310	phosphorylation	93	4173	1.8275e-10	7.66198e-09	ENSMUSG00000058174:mmu-miR-25-3p,ENSMUSG00000031555:mmu-miR-126a-3p,ENSMUSG00000025746:mmu-let-7i-5p,ENSMUSG00000025746:mmu-miR-142a-3p,ENSMUSG00000029816:mmu-miR-1903,ENSMUSG00000021944:mmu-miR-1a-3p,ENSMUSG00000013663:mmu-miR-19a-3p,ENSMUSG00000013663:mmu-miR-19a-3p,ENSMUSG00000013663:mmu-miR-144-3p,ENSMUSG00000037251:mmu-miR-16-5p,ENSMUSG00000037225:mmu-miR-16-5p,ENSMUSG00000033307:mmu-miR-451…
Biological Process	GO:0007420	brain development	43	1251	1.86949e-10	7.79676e-09	ENSMUSG00000038331:mmu-miR-1b-5p,ENSMUSG00000048251:mmu-miR-16-5p,ENSMUSG00000006699:mmu-miR-1a-3p,ENSMUSG00000020423:mmu-miR-25-3p,ENSMUSG00000038696:mmu-miR-16-5p,ENSMUSG00000009900:mmu-miR-16-5p,ENSMUSG00000059921:mmu-miR-144-3p,ENSMUSG00000037541:mmu-miR-451a,ENSMUSG00000036438:mmu-miR-1a-3p,ENSMUSG00000020053:mmu-miR-1a-3p,ENSMUSG00000065954:mmu-miR-16-5p,ENSMUSG00000057329:mmu-miR-16-5p,ENS…
Biological Process	GO:0032940	secretion by cell	54	1824	1.89838e-10	7.87578e-09	ENSMUSG00000025867:mmu-miR-1903,ENSMUSG00000020053:mmu-miR-1a-3p,ENSMUSG00000036438:mmu-miR-1a-3p,ENSMUSG00000052155:mmu-miR-1b-5p,ENSMUSG00000029104:mmu-miR-1b-5p,ENSMUSG00000032413:mmu-miR-1b-5p,ENSMUSG00000020315:mmu-miR-144-3p,ENSMUSG00000022285:mmu-miR-451a,ENSMUSG00000048482:mmu-miR-1a-3p,ENSMUSG00000030557:mmu-miR-1a-3p,ENSMUSG00000094793:mmu-miR-1a-3p,ENSMUSG00000001175:mmu-miR-1a-3p,ENSM…
Molecular Function	GO:0019899	enzyme binding	93	4179	1.97157e-10	8.13684e-09	ENSMUSG00000027104:mmu-miR-1b-5p,ENSMUSG00000027104:mmu-miR-451a,ENSMUSG00000053886:mmu-miR-1903,ENSMUSG00000020532:mmu-miR-451a,ENSMUSG00000031555:mmu-miR-126a-3p,ENSMUSG00000058174:mmu-miR-25-3p,ENSMUSG00000032035:mmu-miR-1a-3p,ENSMUSG00000004099:mmu-miR-126a-3p,ENSMUSG00000013663:mmu-miR-19a-3p,ENSMUSG00000013663:mmu-miR-19a-3p,ENSMUSG00000013663:mmu-miR-144-3p,ENSMUSG00000020593:mmu-miR-1903,…
Biological Process	GO:1903507	negative regulation of nucleic acid-templated transcription	62	2274	2.02276e-10	8.30485e-09	ENSMUSG00000066551:mmu-miR-142a-3p,ENSMUSG00000054387:mmu-miR-16-5p,ENSMUSG00000026380:mmu-miR-1b-5p,ENSMUSG00000024401:mmu-miR-19a-3p,ENSMUSG00000031392:mmu-miR-142a-3p,ENSMUSG00000073830:mmu-miR-1a-3p,ENSMUSG00000056493:mmu-miR-1b-5p,ENSMUSG00000020423:mmu-miR-25-3p,ENSMUSG00000027164:mmu-miR-144-3p,ENSMUSG00000070348:mmu-miR-16-5p,ENSMUSG00000024563:mmu-miR-140-3p,ENSMUSG00000039661:mmu-miR-19…
Molecular Function	GO:0019904	protein domain specific binding	42	1206	2.07971e-10	8.49464e-09	ENSMUSG00000004099:mmu-miR-126a-3p,ENSMUSG00000021257:mmu-miR-16-5p,ENSMUSG00000027273:mmu-miR-19a-3p,ENSMUSG00000004872:mmu-miR-1a-3p,ENSMUSG00000031555:mmu-miR-126a-3p,ENSMUSG00000055980:mmu-miR-126a-3p,ENSMUSG00000028184:mmu-miR-451a,ENSMUSG00000061665:mmu-miR-142a-3p,ENSMUSG00000031144:mmu-miR-451a,ENSMUSG00000045515:mmu-miR-140-3p,ENSMUSG00000004319:mmu-miR-1a-3p,ENSMUSG00000089682:mmu-miR-1…
Biological Process	GO:1902679	negative regulation of RNA biosynthetic process	62	2276	2.09465e-10	8.51178e-09	ENSMUSG00000023951:mmu-miR-16-5p,ENSMUSG00000023951:mmu-miR-126a-3p,ENSMUSG00000024921:mmu-miR-142a-3p,ENSMUSG00000037395:mmu-miR-144-3p,ENSMUSG00000052565:mmu-miR-1b-5p,ENSMUSG00000028717:mmu-miR-126a-3p,ENSMUSG00000022306:mmu-miR-19a-3p,ENSMUSG00000096688:mmu-miR-1a-3p,ENSMUSG00000096688:mmu-let-7i-5p,ENSMUSG00000060314:mmu-miR-1b-5p,ENSMUSG00000020542:mmu-miR-1a-3p,ENSMUSG00000026313:mmu-miR-1…
Biological Process	GO:0044699	single-organism process	330	23758	2.12957e-10	8.60956e-09	ENSMUSG00000002111:mmu-miR-126a-3p,ENSMUSG00000059974:mmu-miR-1903,ENSMUSG00000078673:mmu-miR-1a-3p,ENSMUSG00000040289:mmu-miR-451a,ENSMUSG00000021944:mmu-miR-1a-3p,ENSMUSG00000033400:mmu-miR-1903,ENSMUSG00000042520:mmu-miR-19a-3p,ENSMUSG00000038173:mmu-miR-144-3p,ENSMUSG00000039166:mmu-miR-1b-5p,ENSMUSG00000048540:mmu-miR-1903,ENSMUSG00000049791:mmu-miR-19a-3p,ENSMUSG00000070867:mmu-miR-1903,ENS…
Biological Process	GO:0009991	response to extracellular stimulus	37	973	2.43757e-10	9.80471e-09	ENSMUSG00000062908:mmu-miR-19a-3p,ENSMUSG00000002068:mmu-miR-16-5p,ENSMUSG00000094793:mmu-miR-1a-3p,ENSMUSG00000048482:mmu-miR-1a-3p,ENSMUSG00000034957:mmu-miR-144-3p,ENSMUSG00000020053:mmu-miR-1a-3p,ENSMUSG00000032788:mmu-miR-1b-5p,ENSMUSG00000057329:mmu-miR-16-5p,ENSMUSG00000052684:mmu-miR-16-5p,ENSMUSG00000023206:mmu-miR-1b-5p,ENSMUSG00000073830:mmu-miR-1a-3p,ENSMUSG00000037541:mmu-miR-451a,EN…
Biological Process	GO:0043067	regulation of programmed cell death	77	3182	2.55062e-10	1.02076e-08	ENSMUSG00000017652:mmu-miR-16-5p,ENSMUSG00000033685:mmu-miR-1a-3p,ENSMUSG00000025980:mmu-miR-1a-3p,ENSMUSG00000039005:mmu-miR-1b-5p,ENSMUSG00000021109:mmu-miR-144-3p,ENSMUSG00000020542:mmu-miR-1a-3p,ENSMUSG00000016496:mmu-miR-16-5p,ENSMUSG00000050953:mmu-miR-1a-3p,ENSMUSG00000033307:mmu-miR-451a,ENSMUSG00000049606:mmu-miR-451a,ENSMUSG00000037225:mmu-miR-16-5p,ENSMUSG00000054263:mmu-miR-144-3p,ENS…
Biological Process	GO:0050767	regulation of neurogenesis	45	1365	2.59464e-10	1.03316e-08	ENSMUSG00000022346:mmu-miR-451a,ENSMUSG00000032913:mmu-miR-144-3p,ENSMUSG00000055116:mmu-miR-142a-3p,ENSMUSG00000059974:mmu-miR-1903,ENSMUSG00000061665:mmu-miR-142a-3p,ENSMUSG00000027276:mmu-miR-16-5p,ENSMUSG00000025746:mmu-let-7i-5p,ENSMUSG00000025746:mmu-miR-142a-3p,ENSMUSG00000003452:mmu-miR-16-5p,ENSMUSG00000027273:mmu-miR-19a-3p,ENSMUSG00000022892:mmu-miR-16-5p,ENSMUSG00000013663:mmu-miR-19a…
Biological Process	GO:0010941	regulation of cell death	80	3373	2.72693e-10	1.08041e-08	ENSMUSG00000028245:mmu-miR-451a,ENSMUSG00000027087:mmu-miR-16-5p,ENSMUSG00000020053:mmu-miR-1a-3p,ENSMUSG00000026932:mmu-miR-1b-5p,ENSMUSG00000006678:mmu-miR-1a-3p,ENSMUSG00000057329:mmu-miR-16-5p,ENSMUSG00000029104:mmu-miR-1b-5p,ENSMUSG00000027951:mmu-miR-1a-3p,ENSMUSG00000033658:mmu-miR-16-5p,ENSMUSG00000033658:mmu-miR-451a,ENSMUSG00000038145:mmu-miR-451a,ENSMUSG00000027665:mmu-miR-1b-5p,ENSMUS…
Biological Process	GO:0043549	regulation of kinase activity	45	1370	2.91276e-10	1.1483e-08	ENSMUSG00000036438:mmu-miR-1a-3p,ENSMUSG00000020053:mmu-miR-1a-3p,ENSMUSG00000034957:mmu-miR-144-3p,ENSMUSG00000022788:mmu-miR-16-5p,ENSMUSG00000027715:mmu-miR-1b-5p,ENSMUSG00000003032:mmu-miR-1a-3p,ENSMUSG00000009073:mmu-let-7i-5p,ENSMUSG00000028967:mmu-miR-126a-3p,ENSMUSG00000027951:mmu-miR-1a-3p,ENSMUSG00000048482:mmu-miR-1a-3p,ENSMUSG00000002068:mmu-miR-16-5p,ENSMUSG00000001175:mmu-miR-1a-3p,…
Biological Process	GO:0044765	single-organism transport	99	4607	2.93257e-10	1.15038e-08	ENSMUSG00000061665:mmu-miR-142a-3p,ENSMUSG00000031555:mmu-miR-126a-3p,ENSMUSG00000025746:mmu-let-7i-5p,ENSMUSG00000025746:mmu-miR-142a-3p,ENSMUSG00000013663:mmu-miR-19a-3p,ENSMUSG00000013663:mmu-miR-19a-3p,ENSMUSG00000013663:mmu-miR-144-3p,ENSMUSG00000061742:mmu-miR-1903,ENSMUSG00000021288:mmu-miR-16-5p,ENSMUSG00000078673:mmu-miR-1a-3p,ENSMUSG00000004319:mmu-miR-1a-3p,ENSMUSG00000050953:mmu-miR-1…
Biological Process	GO:0031667	response to nutrient levels	35	888	2.97391e-10	1.16065e-08	ENSMUSG00000048482:mmu-miR-1a-3p,ENSMUSG00000002068:mmu-miR-16-5p,ENSMUSG00000094793:mmu-miR-1a-3p,ENSMUSG00000062908:mmu-miR-19a-3p,ENSMUSG00000052684:mmu-miR-16-5p,ENSMUSG00000057329:mmu-miR-16-5p,ENSMUSG00000032788:mmu-miR-1b-5p,ENSMUSG00000020053:mmu-miR-1a-3p,ENSMUSG00000034957:mmu-miR-144-3p,ENSMUSG00000050697:mmu-miR-144-3p,ENSMUSG00000050697:mmu-miR-451a,ENSMUSG00000037541:mmu-miR-451a,EN…
Biological Process	GO:0048666	neuron development	57	2013	2.98803e-10	1.16065e-08	ENSMUSG00000003032:mmu-miR-1a-3p,ENSMUSG00000029104:mmu-miR-1b-5p,ENSMUSG00000057329:mmu-miR-16-5p,ENSMUSG00000006678:mmu-miR-1a-3p,ENSMUSG00000052684:mmu-miR-16-5p,ENSMUSG00000030084:mmu-miR-1b-5p,ENSMUSG00000027852:mmu-miR-1b-5p,ENSMUSG00000022952:mmu-miR-126a-3p,ENSMUSG00000022861:mmu-miR-1903,ENSMUSG00000019647:mmu-miR-142a-3p,ENSMUSG00000048482:mmu-miR-1a-3p,ENSMUSG00000060534:mmu-miR-1903,E…
Biological Process	GO:0007369	gastrulation	19	268	3.70765e-10	1.42619e-08	ENSMUSG00000052155:mmu-miR-1b-5p,ENSMUSG00000029104:mmu-miR-1b-5p,ENSMUSG00000003032:mmu-miR-1a-3p,ENSMUSG00000041075:mmu-miR-1a-3p,ENSMUSG00000041075:mmu-miR-126a-3p,ENSMUSG00000027087:mmu-miR-16-5p,ENSMUSG00000021944:mmu-miR-1a-3p,ENSMUSG00000015605:mmu-miR-1a-3p,ENSMUSG00000068327:mmu-miR-1a-3p,ENSMUSG00000030201:mmu-miR-19a-3p,ENSMUSG00000068299:mmu-miR-19a-3p,ENSMUSG00000009073:mmu-let-7i-5p…
Biological Process	GO:0071396	cellular response to lipid	40	1131	3.6943e-10	1.42619e-08	ENSMUSG00000048482:mmu-miR-1a-3p,ENSMUSG00000094793:mmu-miR-1a-3p,ENSMUSG00000041515:mmu-miR-451a,ENSMUSG00000028967:mmu-miR-126a-3p,ENSMUSG00000027490:mmu-miR-1b-5p,ENSMUSG00000027715:mmu-miR-1b-5p,ENSMUSG00000003032:mmu-miR-1a-3p,ENSMUSG00000020053:mmu-miR-1a-3p,ENSMUSG00000029661:mmu-let-7i-5p,ENSMUSG00000050697:mmu-miR-144-3p,ENSMUSG00000050697:mmu-miR-451a,ENSMUSG00000024401:mmu-miR-19a-3p,E…
Biological Process	GO:0051247	positive regulation of protein metabolic process	70	2784	3.90408e-10	1.49449e-08	ENSMUSG00000030525:mmu-miR-19a-3p,ENSMUSG00000028086:mmu-miR-25-3p,ENSMUSG00000037523:mmu-miR-1b-5p,ENSMUSG00000050395:mmu-miR-1903,ENSMUSG00000030744:mmu-miR-1b-5p,ENSMUSG00000070348:mmu-miR-16-5p,ENSMUSG00000005268:mmu-miR-1903,ENSMUSG00000033644:mmu-miR-1b-5p,ENSMUSG00000006699:mmu-miR-1a-3p,ENSMUSG00000009555:mmu-miR-1a-3p,ENSMUSG00000009900:mmu-miR-16-5p,ENSMUSG00000036438:mmu-miR-1a-3p,ENSM…
Biological Process	GO:1903530	regulation of secretion by cell	44	1333	4.00877e-10	1.52719e-08	ENSMUSG00000046314:mmu-miR-1b-5p,ENSMUSG00000055116:mmu-miR-142a-3p,ENSMUSG00000061665:mmu-miR-142a-3p,ENSMUSG00000003452:mmu-miR-16-5p,ENSMUSG00000027273:mmu-miR-19a-3p,ENSMUSG00000031555:mmu-miR-126a-3p,ENSMUSG00000055980:mmu-miR-126a-3p,ENSMUSG00000025746:mmu-let-7i-5p,ENSMUSG00000025746:mmu-miR-142a-3p,ENSMUSG00000034908:mmu-miR-451a,ENSMUSG00000078673:mmu-miR-1a-3p,ENSMUSG00000021756:mmu-miR…
Biological Process	GO:0031327	negative regulation of cellular biosynthetic process	76	3158	4.39168e-10	1.66506e-08	ENSMUSG00000031930:mmu-miR-25-3p,ENSMUSG00000002881:mmu-miR-1903,ENSMUSG00000003032:mmu-miR-1a-3p,ENSMUSG00000027210:mmu-let-7i-5p,ENSMUSG00000052684:mmu-miR-16-5p,ENSMUSG00000063804:mmu-miR-1b-5p,ENSMUSG00000027490:mmu-miR-1b-5p,ENSMUSG00000041515:mmu-miR-451a,ENSMUSG00000028967:mmu-miR-126a-3p,ENSMUSG00000022952:mmu-miR-126a-3p,ENSMUSG00000030557:mmu-miR-1a-3p,ENSMUSG00000028086:mmu-miR-25-3p,E…
Biological Process	GO:0042981	regulation of apoptotic process	76	3159	4.45496e-10	1.681e-08	ENSMUSG00000048251:mmu-miR-16-5p,ENSMUSG00000020099:mmu-miR-1b-5p,ENSMUSG00000028495:mmu-miR-1a-3p,ENSMUSG00000026029:mmu-miR-1b-5p,ENSMUSG00000090877:mmu-miR-1a-3p,ENSMUSG00000027164:mmu-miR-144-3p,ENSMUSG00000020423:mmu-miR-25-3p,ENSMUSG00000050697:mmu-miR-144-3p,ENSMUSG00000050697:mmu-miR-451a,ENSMUSG00000054387:mmu-miR-16-5p,ENSMUSG00000066551:mmu-miR-142a-3p,ENSMUSG00000044647:mmu-miR-1b-5p,…
Biological Process	GO:2000113	negative regulation of cellular macromolecule biosynthetic process	73	2976	4.54727e-10	1.7077e-08	ENSMUSG00000039661:mmu-miR-1903,ENSMUSG00000024563:mmu-miR-140-3p,ENSMUSG00000049336:mmu-miR-451a,ENSMUSG00000068457:mmu-miR-1b-5p,ENSMUSG00000024401:mmu-miR-19a-3p,ENSMUSG00000066551:mmu-miR-142a-3p,ENSMUSG00000054387:mmu-miR-16-5p,ENSMUSG00000026380:mmu-miR-1b-5p,ENSMUSG00000050697:mmu-miR-144-3p,ENSMUSG00000050697:mmu-miR-451a,ENSMUSG00000027164:mmu-miR-144-3p,ENSMUSG00000020423:mmu-miR-25-3p,…
Biological Process	GO:0007517	muscle organ development	30	682	4.58962e-10	1.71548e-08	ENSMUSG00000022306:mmu-miR-19a-3p,ENSMUSG00000020423:mmu-miR-25-3p,ENSMUSG00000056493:mmu-miR-1b-5p,ENSMUSG00000026313:mmu-miR-1a-3p,ENSMUSG00000020542:mmu-miR-1a-3p,ENSMUSG00000050697:mmu-miR-144-3p,ENSMUSG00000050697:mmu-miR-451a,ENSMUSG00000026349:mmu-miR-16-5p,ENSMUSG00000009900:mmu-miR-16-5p,ENSMUSG00000050953:mmu-miR-1a-3p,ENSMUSG00000028736:mmu-miR-1a-3p,ENSMUSG00000037225:mmu-miR-16-5p,EN…
Biological Process	GO:0001101	response to acid chemical	32	769	4.71238e-10	1.75309e-08	ENSMUSG00000021109:mmu-miR-144-3p,ENSMUSG00000022528:mmu-miR-1a-3p,ENSMUSG00000033792:mmu-miR-1b-5p,ENSMUSG00000049791:mmu-miR-19a-3p,ENSMUSG00000033685:mmu-miR-1a-3p,ENSMUSG00000020838:mmu-miR-16-5p,ENSMUSG00000005533:mmu-miR-1a-3p,ENSMUSG00000039005:mmu-miR-1b-5p,ENSMUSG00000015243:mmu-miR-144-3p,ENSMUSG00000026193:mmu-miR-1a-3p,ENSMUSG00000026193:mmu-miR-140-3p,ENSMUSG00000050953:mmu-miR-1a-3p…
Biological Process	GO:0001934	positive regulation of protein phosphorylation	48	1551	5.10968e-10	1.89201e-08	ENSMUSG00000017466:mmu-miR-19a-3p,ENSMUSG00000060534:mmu-miR-1903,ENSMUSG00000048482:mmu-miR-1a-3p,ENSMUSG00000027665:mmu-miR-1b-5p,ENSMUSG00000001175:mmu-miR-1a-3p,ENSMUSG00000021549:mmu-miR-1a-3p,ENSMUSG00000036438:mmu-miR-1a-3p,ENSMUSG00000020053:mmu-miR-1a-3p,ENSMUSG00000027087:mmu-miR-16-5p,ENSMUSG00000052684:mmu-miR-16-5p,ENSMUSG00000022788:mmu-miR-16-5p,ENSMUSG00000052155:mmu-miR-1b-5p,ENS…
Biological Process	GO:0009890	negative regulation of biosynthetic process	79	3357	5.21006e-10	1.92021e-08	ENSMUSG00000025746:mmu-let-7i-5p,ENSMUSG00000025746:mmu-miR-142a-3p,ENSMUSG00000004099:mmu-miR-126a-3p,ENSMUSG00000004872:mmu-miR-1a-3p,ENSMUSG00000002111:mmu-miR-126a-3p,ENSMUSG00000027104:mmu-miR-1b-5p,ENSMUSG00000027104:mmu-miR-451a,ENSMUSG00000061665:mmu-miR-142a-3p,ENSMUSG00000045515:mmu-miR-140-3p,ENSMUSG00000017491:mmu-miR-1a-3p,ENSMUSG00000078673:mmu-miR-1a-3p,ENSMUSG00000040289:mmu-miR-4…
Biological Process	GO:0051098	regulation of binding	31	729	5.2893e-10	1.94039e-08	ENSMUSG00000052684:mmu-miR-16-5p,ENSMUSG00000057329:mmu-miR-16-5p,ENSMUSG00000003032:mmu-miR-1a-3p,ENSMUSG00000036438:mmu-miR-1a-3p,ENSMUSG00000020053:mmu-miR-1a-3p,ENSMUSG00000038193:mmu-miR-1a-3p,ENSMUSG00000022346:mmu-miR-451a,ENSMUSG00000048482:mmu-miR-1a-3p,ENSMUSG00000040289:mmu-miR-451a,ENSMUSG00000001175:mmu-miR-1a-3p,ENSMUSG00000038760:mmu-miR-1b-5p,ENSMUSG00000022892:mmu-miR-16-5p,ENSMU…
Biological Process	GO:0045859	regulation of protein kinase activity	42	1247	5.67646e-10	2.07282e-08	ENSMUSG00000048482:mmu-miR-1a-3p,ENSMUSG00000001175:mmu-miR-1a-3p,ENSMUSG00000002068:mmu-miR-16-5p,ENSMUSG00000028967:mmu-miR-126a-3p,ENSMUSG00000009073:mmu-let-7i-5p,ENSMUSG00000027951:mmu-miR-1a-3p,ENSMUSG00000027715:mmu-miR-1b-5p,ENSMUSG00000022788:mmu-miR-16-5p,ENSMUSG00000020053:mmu-miR-1a-3p,ENSMUSG00000036438:mmu-miR-1a-3p,ENSMUSG00000034957:mmu-miR-144-3p,ENSMUSG00000009900:mmu-miR-16-5p,…
Biological Process	GO:0016070	RNA metabolic process	154	8602	5.72425e-10	2.08069e-08	ENSMUSG00000037395:mmu-miR-144-3p,ENSMUSG00000024921:mmu-miR-142a-3p,ENSMUSG00000031864:mmu-miR-451a,ENSMUSG00000026234:mmu-miR-16-5p,ENSMUSG00000031834:mmu-miR-126a-3p,ENSMUSG00000002748:mmu-miR-1903,ENSMUSG00000031483:mmu-miR-16-5p,ENSMUSG00000042292:mmu-miR-1a-3p,ENSMUSG00000033961:mmu-miR-1b-5p,ENSMUSG00000022306:mmu-miR-19a-3p,ENSMUSG00000005533:mmu-miR-1a-3p,ENSMUSG00000034673:mmu-miR-1903,…
Biological Process	GO:0048634	regulation of muscle organ development	16	187	6.01581e-10	2.17668e-08	ENSMUSG00000057329:mmu-miR-16-5p,ENSMUSG00000025746:mmu-let-7i-5p,ENSMUSG00000025746:mmu-miR-142a-3p,ENSMUSG00000055116:mmu-miR-142a-3p,ENSMUSG00000020053:mmu-miR-1a-3p,ENSMUSG00000021944:mmu-miR-1a-3p,ENSMUSG00000048482:mmu-miR-1a-3p,ENSMUSG00000030201:mmu-miR-19a-3p,ENSMUSG00000027852:mmu-miR-1b-5p,ENSMUSG00000013663:mmu-miR-19a-3p,ENSMUSG00000013663:mmu-miR-19a-3p,ENSMUSG00000013663:mmu-miR-14…
Biological Process	GO:0051128	regulation of cellular component organization	93	4274	6.3804e-10	2.2981e-08	ENSMUSG00000054611:mmu-miR-19a-3p,ENSMUSG00000042203:mmu-miR-1b-5p,ENSMUSG00000036533:mmu-miR-144-3p,ENSMUSG00000023951:mmu-miR-16-5p,ENSMUSG00000023951:mmu-miR-126a-3p,ENSMUSG00000025266:mmu-let-7i-5p,ENSMUSG00000073563:mmu-miR-1b-5p,ENSMUSG00000024921:mmu-miR-142a-3p,ENSMUSG00000023050:mmu-miR-19a-3p,ENSMUSG00000026193:mmu-miR-1a-3p,ENSMUSG00000026193:mmu-miR-140-3p,ENSMUSG00000005533:mmu-miR-1…
Biological Process	GO:0051046	regulation of secretion	45	1405	6.43322e-10	2.30664e-08	ENSMUSG00000034908:mmu-miR-451a,ENSMUSG00000021756:mmu-miR-142a-3p,ENSMUSG00000078673:mmu-miR-1a-3p,ENSMUSG00000061665:mmu-miR-142a-3p,ENSMUSG00000055116:mmu-miR-142a-3p,ENSMUSG00000046314:mmu-miR-1b-5p,ENSMUSG00000025746:mmu-let-7i-5p,ENSMUSG00000025746:mmu-miR-142a-3p,ENSMUSG00000031555:mmu-miR-126a-3p,ENSMUSG00000055980:mmu-miR-126a-3p,ENSMUSG00000027273:mmu-miR-19a-3p,ENSMUSG00000003452:mmu-m…
Biological Process	GO:0003007	heart morphogenesis	21	345	7.1571e-10	2.55463e-08	ENSMUSG00000030201:mmu-miR-19a-3p,ENSMUSG00000017491:mmu-miR-1a-3p,ENSMUSG00000040289:mmu-miR-451a,ENSMUSG00000021944:mmu-miR-1a-3p,ENSMUSG00000015605:mmu-miR-1a-3p,ENSMUSG00000038193:mmu-miR-1a-3p,ENSMUSG00000027104:mmu-miR-1b-5p,ENSMUSG00000027104:mmu-miR-451a,ENSMUSG00000027276:mmu-miR-16-5p,ENSMUSG00000052684:mmu-miR-16-5p,ENSMUSG00000022306:mmu-miR-19a-3p,ENSMUSG00000002748:mmu-miR-1903,ENSM…
Biological Process	GO:0051253	negative regulation of RNA metabolic process	63	2408	7.31481e-10	2.59922e-08	ENSMUSG00000020593:mmu-miR-1903,ENSMUSG00000014074:mmu-miR-16-5p,ENSMUSG00000020364:mmu-miR-1b-5p,ENSMUSG00000045515:mmu-miR-140-3p,ENSMUSG00000033014:mmu-miR-451a,ENSMUSG00000017491:mmu-miR-1a-3p,ENSMUSG00000040289:mmu-miR-451a,ENSMUSG00000078673:mmu-miR-1a-3p,ENSMUSG00000015605:mmu-miR-1a-3p,ENSMUSG00000002111:mmu-miR-126a-3p,ENSMUSG00000022346:mmu-miR-451a,ENSMUSG00000027104:mmu-miR-1b-5p,ENSM…
Biological Process	GO:0032270	positive regulation of cellular protein metabolic process	67	2646	7.45648e-10	2.63773e-08	ENSMUSG00000039005:mmu-miR-1b-5p,ENSMUSG00000017652:mmu-miR-16-5p,ENSMUSG00000025980:mmu-miR-1a-3p,ENSMUSG00000049791:mmu-miR-19a-3p,ENSMUSG00000070867:mmu-miR-1903,ENSMUSG00000028517:mmu-miR-16-5p,ENSMUSG00000025586:mmu-miR-1a-3p,ENSMUSG00000025586:mmu-miR-25-3p,ENSMUSG00000033307:mmu-miR-451a,ENSMUSG00000037225:mmu-miR-16-5p,ENSMUSG00000028736:mmu-miR-1a-3p,ENSMUSG00000013663:mmu-miR-19a-3p,ENS…
Biological Process	GO:0009749	response to glucose	23	420	8.61815e-10	3.03512e-08	ENSMUSG00000096688:mmu-miR-1a-3p,ENSMUSG00000096688:mmu-let-7i-5p,ENSMUSG00000021109:mmu-miR-144-3p,ENSMUSG00000073834:mmu-miR-1a-3p,ENSMUSG00000073834:mmu-let-7i-5p,ENSMUSG00000066551:mmu-miR-142a-3p,ENSMUSG00000033685:mmu-miR-1a-3p,ENSMUSG00000073830:mmu-miR-1a-3p,ENSMUSG00000000902:mmu-miR-1a-3p,ENSMUSG00000006699:mmu-miR-1a-3p,ENSMUSG00000005533:mmu-miR-1a-3p,ENSMUSG00000026193:mmu-miR-1a-3p,…
Biological Process	GO:0051270	regulation of cellular component movement	44	1368	8.8981e-10	3.11985e-08	ENSMUSG00000027712:mmu-miR-1a-3p,ENSMUSG00000059921:mmu-miR-144-3p,ENSMUSG00000009900:mmu-miR-16-5p,ENSMUSG00000066551:mmu-miR-142a-3p,ENSMUSG00000020272:mmu-miR-25-3p,ENSMUSG00000028086:mmu-miR-25-3p,ENSMUSG00000019647:mmu-miR-142a-3p,ENSMUSG00000009073:mmu-let-7i-5p,ENSMUSG00000003032:mmu-miR-1a-3p,ENSMUSG00000057329:mmu-miR-16-5p,ENSMUSG00000052684:mmu-miR-16-5p,ENSMUSG00000027087:mmu-miR-16-5…
Biological Process	GO:0048568	embryonic organ development	29	660	9.25886e-10	3.23203e-08	ENSMUSG00000021944:mmu-miR-1a-3p,ENSMUSG00000015605:mmu-miR-1a-3p,ENSMUSG00000040289:mmu-miR-451a,ENSMUSG00000030201:mmu-miR-19a-3p,ENSMUSG00000017491:mmu-miR-1a-3p,ENSMUSG00000022952:mmu-miR-126a-3p,ENSMUSG00000034957:mmu-miR-144-3p,ENSMUSG00000022346:mmu-miR-451a,ENSMUSG00000027087:mmu-miR-16-5p,ENSMUSG00000038193:mmu-miR-1a-3p,ENSMUSG00000021256:mmu-miR-1903,ENSMUSG00000027210:mmu-let-7i-5p,EN…
Biological Process	GO:0030334	regulation of cell migration	40	1171	1.00411e-09	3.48972e-08	ENSMUSG00000026193:mmu-miR-1a-3p,ENSMUSG00000026193:mmu-miR-140-3p,ENSMUSG00000037225:mmu-miR-16-5p,ENSMUSG00000025586:mmu-miR-1a-3p,ENSMUSG00000025586:mmu-miR-25-3p,ENSMUSG00000033307:mmu-miR-451a,ENSMUSG00000023951:mmu-miR-16-5p,ENSMUSG00000023951:mmu-miR-126a-3p,ENSMUSG00000050953:mmu-miR-1a-3p,ENSMUSG00000016496:mmu-miR-16-5p,ENSMUSG00000033792:mmu-miR-1b-5p,ENSMUSG00000026313:mmu-miR-1a-3p,E…
Biological Process	GO:0045597	positive regulation of cell differentiation	51	1753	1.1589e-09	4.00507e-08	ENSMUSG00000090877:mmu-miR-1a-3p,ENSMUSG00000006699:mmu-miR-1a-3p,ENSMUSG00000023206:mmu-miR-1b-5p,ENSMUSG00000027164:mmu-miR-144-3p,ENSMUSG00000009900:mmu-miR-16-5p,ENSMUSG00000066551:mmu-miR-142a-3p,ENSMUSG00000024401:mmu-miR-19a-3p,ENSMUSG00000039086:mmu-miR-1b-5p,ENSMUSG00000028945:mmu-miR-1a-3p,ENSMUSG00000024563:mmu-miR-140-3p,ENSMUSG00000026029:mmu-miR-1b-5p,ENSMUSG00000009073:mmu-let-7i-5…
Biological Process	GO:0070887	cellular response to chemical stimulus	107	5272	1.16756e-09	4.00507e-08	ENSMUSG00000020593:mmu-miR-1903,ENSMUSG00000013663:mmu-miR-19a-3p,ENSMUSG00000013663:mmu-miR-19a-3p,ENSMUSG00000013663:mmu-miR-144-3p,ENSMUSG00000017491:mmu-miR-1a-3p,ENSMUSG00000021944:mmu-miR-1a-3p,ENSMUSG00000078673:mmu-miR-1a-3p,ENSMUSG00000040289:mmu-miR-451a,ENSMUSG00000020532:mmu-miR-451a,ENSMUSG00000002111:mmu-miR-126a-3p,ENSMUSG00000061665:mmu-miR-142a-3p,ENSMUSG00000031144:mmu-miR-451a,…
Cellular Component	GO:0097458	neuron part	67	2675	1.16411e-09	4.00507e-08	ENSMUSG00000036099:mmu-miR-451a,ENSMUSG00000066551:mmu-miR-142a-3p,ENSMUSG00000000902:mmu-miR-1a-3p,ENSMUSG00000022456:mmu-miR-1b-5p,ENSMUSG00000028945:mmu-miR-1a-3p,ENSMUSG00000028495:mmu-miR-1a-3p,ENSMUSG00000026029:mmu-miR-1b-5p,ENSMUSG00000048251:mmu-miR-16-5p,ENSMUSG00000049336:mmu-miR-451a,ENSMUSG00000039086:mmu-miR-1b-5p,ENSMUSG00000000560:mmu-miR-1b-5p,ENSMUSG00000019647:mmu-miR-142a-3p,E…
Biological Process	GO:0060322	head development	43	1329	1.17457e-09	4.01176e-08	ENSMUSG00000037225:mmu-miR-16-5p,ENSMUSG00000037251:mmu-miR-16-5p,ENSMUSG00000033307:mmu-miR-451a,ENSMUSG00000042292:mmu-miR-1a-3p,ENSMUSG00000021109:mmu-miR-144-3p,ENSMUSG00000030302:mmu-let-7i-5p,ENSMUSG00000022528:mmu-miR-1a-3p,ENSMUSG00000033792:mmu-miR-1b-5p,ENSMUSG00000049791:mmu-miR-19a-3p,ENSMUSG00000005533:mmu-miR-1a-3p,ENSMUSG00000020838:mmu-miR-16-5p,ENSMUSG00000015709:mmu-miR-451a,ENS…
Biological Process	GO:0001678	cellular glucose homeostasis	20	321	1.22272e-09	4.15831e-08	ENSMUSG00000020053:mmu-miR-1a-3p,ENSMUSG00000057329:mmu-miR-16-5p,ENSMUSG00000034908:mmu-miR-451a,ENSMUSG00000094793:mmu-miR-1a-3p,ENSMUSG00000021944:mmu-miR-1a-3p,ENSMUSG00000015605:mmu-miR-1a-3p,ENSMUSG00000078673:mmu-miR-1a-3p,ENSMUSG00000030557:mmu-miR-1a-3p,ENSMUSG00000027665:mmu-miR-1b-5p,ENSMUSG00000026434:mmu-miR-451a,ENSMUSG00000078680:mmu-miR-1a-3p,ENSMUSG00000026193:mmu-miR-1a-3p,ENSMU…
Biological Process	GO:0033500	carbohydrate homeostasis	24	467	1.30516e-09	4.4009e-08	ENSMUSG00000034908:mmu-miR-451a,ENSMUSG00000015605:mmu-miR-1a-3p,ENSMUSG00000021944:mmu-miR-1a-3p,ENSMUSG00000078673:mmu-miR-1a-3p,ENSMUSG00000030557:mmu-miR-1a-3p,ENSMUSG00000027665:mmu-miR-1b-5p,ENSMUSG00000094793:mmu-miR-1a-3p,ENSMUSG00000020053:mmu-miR-1a-3p,ENSMUSG00000034957:mmu-miR-144-3p,ENSMUSG00000057329:mmu-miR-16-5p,ENSMUSG00000025746:mmu-let-7i-5p,ENSMUSG00000025746:mmu-miR-142a-3p,E…
Biological Process	GO:0042593	glucose homeostasis	24	467	1.30516e-09	4.4009e-08	ENSMUSG00000021109:mmu-miR-144-3p,ENSMUSG00000050697:mmu-miR-144-3p,ENSMUSG00000050697:mmu-miR-451a,ENSMUSG00000073834:mmu-miR-1a-3p,ENSMUSG00000073834:mmu-let-7i-5p,ENSMUSG00000096688:mmu-miR-1a-3p,ENSMUSG00000096688:mmu-let-7i-5p,ENSMUSG00000031834:mmu-miR-126a-3p,ENSMUSG00000073830:mmu-miR-1a-3p,ENSMUSG00000000902:mmu-miR-1a-3p,ENSMUSG00000033685:mmu-miR-1a-3p,ENSMUSG00000005533:mmu-miR-1a-3p,…
Biological Process	GO:0032880	regulation of protein localization	56	2039	1.31977e-09	4.43129e-08	ENSMUSG00000034908:mmu-miR-451a,ENSMUSG00000014074:mmu-miR-16-5p,ENSMUSG00000078673:mmu-miR-1a-3p,ENSMUSG00000061665:mmu-miR-142a-3p,ENSMUSG00000055116:mmu-miR-142a-3p,ENSMUSG00000032913:mmu-miR-144-3p,ENSMUSG00000055980:mmu-miR-126a-3p,ENSMUSG00000031555:mmu-miR-126a-3p,ENSMUSG00000027273:mmu-miR-19a-3p,ENSMUSG00000003452:mmu-miR-16-5p,ENSMUSG00000025746:mmu-let-7i-5p,ENSMUSG00000025746:mmu-miR-…
Biological Process	GO:0007507	heart development	33	848	1.34391e-09	4.4873e-08	ENSMUSG00000004872:mmu-miR-1a-3p,ENSMUSG00000027276:mmu-miR-16-5p,ENSMUSG00000046020:mmu-miR-1b-5p,ENSMUSG00000027104:mmu-miR-1b-5p,ENSMUSG00000027104:mmu-miR-451a,ENSMUSG00000038193:mmu-miR-1a-3p,ENSMUSG00000021944:mmu-miR-1a-3p,ENSMUSG00000015605:mmu-miR-1a-3p,ENSMUSG00000040289:mmu-miR-451a,ENSMUSG00000017491:mmu-miR-1a-3p,ENSMUSG00000030201:mmu-miR-19a-3p,ENSMUSG00000013663:mmu-miR-19a-3p,ENS…
Biological Process	GO:0009746	response to hexose	23	430	1.35344e-09	4.4873e-08	ENSMUSG00000078680:mmu-miR-1a-3p,ENSMUSG00000050953:mmu-miR-1a-3p,ENSMUSG00000026193:mmu-miR-1a-3p,ENSMUSG00000026193:mmu-miR-140-3p,ENSMUSG00000024563:mmu-miR-140-3p,ENSMUSG00000005533:mmu-miR-1a-3p,ENSMUSG00000006699:mmu-miR-1a-3p,ENSMUSG00000033685:mmu-miR-1a-3p,ENSMUSG00000073830:mmu-miR-1a-3p,ENSMUSG00000000902:mmu-miR-1a-3p,ENSMUSG00000096688:mmu-miR-1a-3p,ENSMUSG00000096688:mmu-let-7i-5p,E…
Biological Process	GO:0031175	neuron projection development	51	1761	1.35095e-09	4.4873e-08	ENSMUSG00000027852:mmu-miR-1b-5p,ENSMUSG00000019647:mmu-miR-142a-3p,ENSMUSG00000005958:mmu-miR-1b-5p,ENSMUSG00000060534:mmu-miR-1903,ENSMUSG00000048482:mmu-miR-1a-3p,ENSMUSG00000030557:mmu-miR-1a-3p,ENSMUSG00000020315:mmu-miR-144-3p,ENSMUSG00000003032:mmu-miR-1a-3p,ENSMUSG00000006678:mmu-miR-1a-3p,ENSMUSG00000057329:mmu-miR-16-5p,ENSMUSG00000052684:mmu-miR-16-5p,ENSMUSG00000030084:mmu-miR-1b-5p,E…
Biological Process	GO:0032990	cell part morphogenesis	38	1088	1.47219e-09	4.86069e-08	ENSMUSG00000015605:mmu-miR-1a-3p,ENSMUSG00000078673:mmu-miR-1a-3p,ENSMUSG00000068327:mmu-miR-1a-3p,ENSMUSG00000013663:mmu-miR-19a-3p,ENSMUSG00000013663:mmu-miR-19a-3p,ENSMUSG00000013663:mmu-miR-144-3p,ENSMUSG00000022892:mmu-miR-16-5p,ENSMUSG00000027273:mmu-miR-19a-3p,ENSMUSG00000035764:mmu-miR-1b-5p,ENSMUSG00000073834:mmu-miR-1a-3p,ENSMUSG00000073834:mmu-let-7i-5p,ENSMUSG00000063626:mmu-miR-1903,…
Biological Process	GO:0007610	behavior	39	1139	1.54031e-09	5.04357e-08	ENSMUSG00000037541:mmu-miR-451a,ENSMUSG00000073830:mmu-miR-1a-3p,ENSMUSG00000020423:mmu-miR-25-3p,ENSMUSG00000000594:mmu-miR-451a,ENSMUSG00000078680:mmu-miR-1a-3p,ENSMUSG00000030525:mmu-miR-19a-3p,ENSMUSG00000048482:mmu-miR-1a-3p,ENSMUSG00000022952:mmu-miR-126a-3p,ENSMUSG00000046876:mmu-miR-19a-3p,ENSMUSG00000094793:mmu-miR-1a-3p,ENSMUSG00000062202:mmu-miR-1903,ENSMUSG00000026915:mmu-miR-1b-5p,EN…
Biological Process	GO:0060485	mesenchyme development	21	360	1.53602e-09	5.04357e-08	ENSMUSG00000021944:mmu-miR-1a-3p,ENSMUSG00000019647:mmu-miR-142a-3p,ENSMUSG00000040289:mmu-miR-451a,ENSMUSG00000030201:mmu-miR-19a-3p,ENSMUSG00000022346:mmu-miR-451a,ENSMUSG00000000693:mmu-miR-1b-5p,ENSMUSG00000038193:mmu-miR-1a-3p,ENSMUSG00000004872:mmu-miR-1a-3p,ENSMUSG00000029104:mmu-miR-1b-5p,ENSMUSG00000057329:mmu-miR-16-5p,ENSMUSG00000027276:mmu-miR-16-5p,ENSMUSG00000027654:mmu-miR-19a-3p,E…
Biological Process	GO:0050708	regulation of protein secretion	35	946	1.55421e-09	5.06812e-08	ENSMUSG00000032076:mmu-miR-16-5p,ENSMUSG00000078680:mmu-miR-1a-3p,ENSMUSG00000050395:mmu-miR-1903,ENSMUSG00000066551:mmu-miR-142a-3p,ENSMUSG00000024401:mmu-miR-19a-3p,ENSMUSG00000022967:mmu-let-7i-5p,ENSMUSG00000027712:mmu-miR-1a-3p,ENSMUSG00000073830:mmu-miR-1a-3p,ENSMUSG00000027164:mmu-miR-144-3p,ENSMUSG00000020053:mmu-miR-1a-3p,ENSMUSG00000030557:mmu-miR-1a-3p,ENSMUSG00000094793:mmu-miR-1a-3p,…
Biological Process	GO:0009306	protein secretion	38	1092	1.62759e-09	5.28568e-08	ENSMUSG00000094793:mmu-miR-1a-3p,ENSMUSG00000030557:mmu-miR-1a-3p,ENSMUSG00000020315:mmu-miR-144-3p,ENSMUSG00000029104:mmu-miR-1b-5p,ENSMUSG00000020053:mmu-miR-1a-3p,ENSMUSG00000027712:mmu-miR-1a-3p,ENSMUSG00000022967:mmu-let-7i-5p,ENSMUSG00000024401:mmu-miR-19a-3p,ENSMUSG00000066551:mmu-miR-142a-3p,ENSMUSG00000027164:mmu-miR-144-3p,ENSMUSG00000073830:mmu-miR-1a-3p,ENSMUSG00000024563:mmu-miR-140-…
Biological Process	GO:0043408	regulation of MAPK cascade	41	1248	1.89603e-09	6.13232e-08	ENSMUSG00000021944:mmu-miR-1a-3p,ENSMUSG00000013663:mmu-miR-19a-3p,ENSMUSG00000013663:mmu-miR-19a-3p,ENSMUSG00000013663:mmu-miR-144-3p,ENSMUSG00000025746:mmu-let-7i-5p,ENSMUSG00000025746:mmu-miR-142a-3p,ENSMUSG00000031555:mmu-miR-126a-3p,ENSMUSG00000038193:mmu-miR-1a-3p,ENSMUSG00000029816:mmu-miR-1903,ENSMUSG00000022346:mmu-miR-451a,ENSMUSG00000049791:mmu-miR-19a-3p,ENSMUSG00000090935:mmu-miR-190…
Biological Process	GO:2000145	regulation of cell motility	41	1249	1.94018e-09	6.24958e-08	ENSMUSG00000032035:mmu-miR-1a-3p,ENSMUSG00000055980:mmu-miR-126a-3p,ENSMUSG00000031555:mmu-miR-126a-3p,ENSMUSG00000022346:mmu-miR-451a,ENSMUSG00000029816:mmu-miR-1903,ENSMUSG00000032913:mmu-miR-144-3p,ENSMUSG00000021756:mmu-miR-142a-3p,ENSMUSG00000015605:mmu-miR-1a-3p,ENSMUSG00000036144:mmu-miR-1a-3p,ENSMUSG00000022505:mmu-miR-1903,ENSMUSG00000013663:mmu-miR-19a-3p,ENSMUSG00000013663:mmu-miR-19a-…
Biological Process	GO:0050790	regulation of catalytic activity	84	3779	2.01218e-09	6.45526e-08	ENSMUSG00000021549:mmu-miR-1a-3p,ENSMUSG00000017466:mmu-miR-19a-3p,ENSMUSG00000028967:mmu-miR-126a-3p,ENSMUSG00000003032:mmu-miR-1a-3p,ENSMUSG00000022788:mmu-miR-16-5p,ENSMUSG00000052684:mmu-miR-16-5p,ENSMUSG00000036438:mmu-miR-1a-3p,ENSMUSG00000009900:mmu-miR-16-5p,ENSMUSG00000006699:mmu-miR-1a-3p,ENSMUSG00000027351:mmu-miR-144-3p,ENSMUSG00000027351:mmu-miR-126a-3p,ENSMUSG00000005268:mmu-miR-190…
Cellular Component	GO:0043235	receptor complex	24	478	2.06338e-09	6.59283e-08	ENSMUSG00000027087:mmu-miR-16-5p,ENSMUSG00000026251:mmu-miR-19a-3p,ENSMUSG00000030084:mmu-miR-1b-5p,ENSMUSG00000029072:mmu-miR-1b-5p,ENSMUSG00000025746:mmu-let-7i-5p,ENSMUSG00000025746:mmu-miR-142a-3p,ENSMUSG00000052155:mmu-miR-1b-5p,ENSMUSG00000055980:mmu-miR-126a-3p,ENSMUSG00000022892:mmu-miR-16-5p,ENSMUSG00000026417:mmu-miR-1903,ENSMUSG00000008590:mmu-miR-1903,ENSMUSG00000021756:mmu-miR-142a-3…
Biological Process	GO:1901214	regulation of neuron death	26	558	2.0886e-09	6.62001e-08	ENSMUSG00000021549:mmu-miR-1a-3p,ENSMUSG00000060534:mmu-miR-1903,ENSMUSG00000027665:mmu-miR-1b-5p,ENSMUSG00000048482:mmu-miR-1a-3p,ENSMUSG00000038145:mmu-miR-451a,ENSMUSG00000025860:mmu-miR-451a,ENSMUSG00000029104:mmu-miR-1b-5p,ENSMUSG00000057329:mmu-miR-16-5p,ENSMUSG00000025746:mmu-let-7i-5p,ENSMUSG00000025746:mmu-miR-142a-3p,ENSMUSG00000052684:mmu-miR-16-5p,ENSMUSG00000029816:mmu-miR-1903,ENSMU…
Cellular Component	GO:0005667	transcription factor complex	26	558	2.0886e-09	6.62001e-08	ENSMUSG00000023333:mmu-miR-1903,ENSMUSG00000037395:mmu-miR-144-3p,ENSMUSG00000028736:mmu-miR-1a-3p,ENSMUSG00000024563:mmu-miR-140-3p,ENSMUSG00000038331:mmu-miR-1b-5p,ENSMUSG00000020542:mmu-miR-1a-3p,ENSMUSG00000021109:mmu-miR-144-3p,ENSMUSG00000026380:mmu-miR-1b-5p,ENSMUSG00000028717:mmu-miR-126a-3p,ENSMUSG00000015709:mmu-miR-451a,ENSMUSG00000032035:mmu-miR-1a-3p,ENSMUSG00000003032:mmu-miR-1a-3p,…
Biological Process	GO:0051246	regulation of protein metabolic process	103	5055	2.17951e-09	6.88064e-08	ENSMUSG00000032178:mmu-miR-19a-3p,ENSMUSG00000020053:mmu-miR-1a-3p,ENSMUSG00000027087:mmu-miR-16-5p,ENSMUSG00000034957:mmu-miR-144-3p,ENSMUSG00000027715:mmu-miR-1b-5p,ENSMUSG00000020135:mmu-let-7i-5p,ENSMUSG00000052155:mmu-miR-1b-5p,ENSMUSG00000029104:mmu-miR-1b-5p,ENSMUSG00000057329:mmu-miR-16-5p,ENSMUSG00000006678:mmu-miR-1a-3p,ENSMUSG00000009073:mmu-let-7i-5p,ENSMUSG00000027951:mmu-miR-1a-3p,E…
Biological Process	GO:0030030	cell projection organization	61	2361	2.28337e-09	7.17993e-08	ENSMUSG00000054263:mmu-miR-144-3p,ENSMUSG00000026193:mmu-miR-1a-3p,ENSMUSG00000026193:mmu-miR-140-3p,ENSMUSG00000051650:mmu-miR-1b-5p,ENSMUSG00000023951:mmu-miR-16-5p,ENSMUSG00000023951:mmu-miR-126a-3p,ENSMUSG00000036533:mmu-miR-144-3p,ENSMUSG00000033307:mmu-miR-451a,ENSMUSG00000039579:mmu-miR-451a,ENSMUSG00000022762:mmu-miR-25-3p,ENSMUSG00000025586:mmu-miR-1a-3p,ENSMUSG00000025586:mmu-miR-25-3p,…
Biological Process	GO:0090304	nucleic acid metabolic process	162	9379	2.31233e-09	7.24226e-08	ENSMUSG00000006678:mmu-miR-1a-3p,ENSMUSG00000026932:mmu-miR-1b-5p,ENSMUSG00000078619:mmu-miR-1a-3p,ENSMUSG00000027715:mmu-miR-1b-5p,ENSMUSG00000034957:mmu-miR-144-3p,ENSMUSG00000025081:mmu-miR-1b-5p,ENSMUSG00000094793:mmu-miR-1a-3p,ENSMUSG00000040943:mmu-miR-19a-3p,ENSMUSG00000033658:mmu-miR-16-5p,ENSMUSG00000033658:mmu-miR-451a,ENSMUSG00000028271:mmu-miR-1a-3p,ENSMUSG00000028495:mmu-miR-1a-3p,EN…
Biological Process	GO:0030155	regulation of cell adhesion	38	1107	2.36014e-09	7.33402e-08	ENSMUSG00000023951:mmu-miR-16-5p,ENSMUSG00000023951:mmu-miR-126a-3p,ENSMUSG00000026193:mmu-miR-1a-3p,ENSMUSG00000026193:mmu-miR-140-3p,ENSMUSG00000025980:mmu-miR-1a-3p,ENSMUSG00000022528:mmu-miR-1a-3p,ENSMUSG00000028517:mmu-miR-16-5p,ENSMUSG00000031834:mmu-miR-126a-3p,ENSMUSG00000033634:mmu-miR-19a-3p,ENSMUSG00000049791:mmu-miR-19a-3p,ENSMUSG00000016496:mmu-miR-16-5p,ENSMUSG00000029816:mmu-miR-19…
Biological Process	GO:0032268	regulation of cellular protein metabolic process	98	4721	2.35231e-09	7.33402e-08	ENSMUSG00000030201:mmu-miR-19a-3p,ENSMUSG00000025860:mmu-miR-451a,ENSMUSG00000022892:mmu-miR-16-5p,ENSMUSG00000022505:mmu-miR-1903,ENSMUSG00000047888:mmu-miR-1b-5p,ENSMUSG00000022346:mmu-miR-451a,ENSMUSG00000032913:mmu-miR-144-3p,ENSMUSG00000038193:mmu-miR-1a-3p,ENSMUSG00000042292:mmu-miR-1a-3p,ENSMUSG00000026313:mmu-miR-1a-3p,ENSMUSG00000005533:mmu-miR-1a-3p,ENSMUSG00000025266:mmu-let-7i-5p,ENSM…
Biological Process	GO:0007167	enzyme linked receptor protein signaling pathway	43	1371	2.9608e-09	9.16461e-08	ENSMUSG00000032913:mmu-miR-144-3p,ENSMUSG00000055980:mmu-miR-126a-3p,ENSMUSG00000031555:mmu-miR-126a-3p,ENSMUSG00000013663:mmu-miR-19a-3p,ENSMUSG00000013663:mmu-miR-19a-3p,ENSMUSG00000013663:mmu-miR-144-3p,ENSMUSG00000022892:mmu-miR-16-5p,ENSMUSG00000021944:mmu-miR-1a-3p,ENSMUSG00000021756:mmu-miR-142a-3p,ENSMUSG00000033014:mmu-miR-451a,ENSMUSG00000023951:mmu-miR-16-5p,ENSMUSG00000023951:mmu-miR-…
Biological Process	GO:0048511	rhythmic process	28	653	3.10191e-09	9.56402e-08	ENSMUSG00000048540:mmu-miR-1903,ENSMUSG00000078680:mmu-miR-1a-3p,ENSMUSG00000030525:mmu-miR-19a-3p,ENSMUSG00000039579:mmu-miR-451a,ENSMUSG00000023951:mmu-miR-16-5p,ENSMUSG00000023951:mmu-miR-126a-3p,ENSMUSG00000066551:mmu-miR-142a-3p,ENSMUSG00000073834:mmu-miR-1a-3p,ENSMUSG00000073834:mmu-let-7i-5p,ENSMUSG00000050697:mmu-miR-144-3p,ENSMUSG00000050697:mmu-miR-451a,ENSMUSG00000024401:mmu-miR-19a-3p…
Biological Process	GO:0034284	response to monosaccharide	23	450	3.21117e-09	9.86253e-08	ENSMUSG00000026193:mmu-miR-1a-3p,ENSMUSG00000026193:mmu-miR-140-3p,ENSMUSG00000024563:mmu-miR-140-3p,ENSMUSG00000078680:mmu-miR-1a-3p,ENSMUSG00000050953:mmu-miR-1a-3p,ENSMUSG00000096688:mmu-miR-1a-3p,ENSMUSG00000096688:mmu-let-7i-5p,ENSMUSG00000073834:mmu-miR-1a-3p,ENSMUSG00000073834:mmu-let-7i-5p,ENSMUSG00000066551:mmu-miR-142a-3p,ENSMUSG00000021109:mmu-miR-144-3p,ENSMUSG00000006699:mmu-miR-1a-3…
Biological Process	GO:0010605	negative regulation of macromolecule metabolic process	112	5724	3.40757e-09	1.03852e-07	ENSMUSG00000063804:mmu-miR-1b-5p,ENSMUSG00000052684:mmu-miR-16-5p,ENSMUSG00000003032:mmu-miR-1a-3p,ENSMUSG00000027210:mmu-let-7i-5p,ENSMUSG00000026012:mmu-miR-1b-5p,ENSMUSG00000002881:mmu-miR-1903,ENSMUSG00000036438:mmu-miR-1a-3p,ENSMUSG00000031930:mmu-miR-25-3p,ENSMUSG00000030557:mmu-miR-1a-3p,ENSMUSG00000003282:mmu-miR-1b-5p,ENSMUSG00000022952:mmu-miR-126a-3p,ENSMUSG00000028967:mmu-miR-126a-3p,…
Biological Process	GO:0120036	plasma membrane bounded cell projection organization	60	2327	3.39627e-09	1.03852e-07	ENSMUSG00000022788:mmu-miR-16-5p,ENSMUSG00000052684:mmu-miR-16-5p,ENSMUSG00000057329:mmu-miR-16-5p,ENSMUSG00000006678:mmu-miR-1a-3p,ENSMUSG00000029104:mmu-miR-1b-5p,ENSMUSG00000003032:mmu-miR-1a-3p,ENSMUSG00000030084:mmu-miR-1b-5p,ENSMUSG00000060534:mmu-miR-1903,ENSMUSG00000048482:mmu-miR-1a-3p,ENSMUSG00000030557:mmu-miR-1a-3p,ENSMUSG00000005958:mmu-miR-1b-5p,ENSMUSG00000019647:mmu-miR-142a-3p,EN…
Biological Process	GO:0008219	cell death	93	4419	3.48595e-09	1.05828e-07	ENSMUSG00000005533:mmu-miR-1a-3p,ENSMUSG00000022306:mmu-miR-19a-3p,ENSMUSG00000042292:mmu-miR-1a-3p,ENSMUSG00000033792:mmu-miR-1b-5p,ENSMUSG00000026313:mmu-miR-1a-3p,ENSMUSG00000054611:mmu-miR-19a-3p,ENSMUSG00000026234:mmu-miR-16-5p,ENSMUSG00000023951:mmu-miR-16-5p,ENSMUSG00000023951:mmu-miR-126a-3p,ENSMUSG00000030162:mmu-miR-142a-3p,ENSMUSG00000026193:mmu-miR-1a-3p,ENSMUSG00000026193:mmu-miR-140…
Biological Process	GO:0022603	regulation of anatomical structure morphogenesis	46	1538	3.49912e-09	1.05828e-07	ENSMUSG00000066551:mmu-miR-142a-3p,ENSMUSG00000009900:mmu-miR-16-5p,ENSMUSG00000024401:mmu-miR-19a-3p,ENSMUSG00000006699:mmu-miR-1a-3p,ENSMUSG00000023333:mmu-miR-1903,ENSMUSG00000030525:mmu-miR-19a-3p,ENSMUSG00000028086:mmu-miR-25-3p,ENSMUSG00000039086:mmu-miR-1b-5p,ENSMUSG00000005958:mmu-miR-1b-5p,ENSMUSG00000048482:mmu-miR-1a-3p,ENSMUSG00000019647:mmu-miR-142a-3p,ENSMUSG00000022952:mmu-miR-126a…
Biological Process	GO:0006950	response to stress	125	6658	3.57714e-09	1.07777e-07	ENSMUSG00000009207:mmu-miR-142a-3p,ENSMUSG00000027351:mmu-miR-144-3p,ENSMUSG00000027351:mmu-miR-126a-3p,ENSMUSG00000027716:mmu-miR-451a,ENSMUSG00000030744:mmu-miR-1b-5p,ENSMUSG00000032076:mmu-miR-16-5p,ENSMUSG00000070348:mmu-miR-16-5p,ENSMUSG00000040242:mmu-miR-19a-3p,ENSMUSG00000028086:mmu-miR-25-3p,ENSMUSG00000037523:mmu-miR-1b-5p,ENSMUSG00000078680:mmu-miR-1a-3p,ENSMUSG00000030525:mmu-miR-19a-…
Biological Process	GO:1902578	single-organism localization	100	4896	3.59513e-09	1.07908e-07	ENSMUSG00000039166:mmu-miR-1b-5p,ENSMUSG00000033307:mmu-miR-451a,ENSMUSG00000050953:mmu-miR-1a-3p,ENSMUSG00000015243:mmu-miR-144-3p,ENSMUSG00000037225:mmu-miR-16-5p,ENSMUSG00000090935:mmu-miR-1903,ENSMUSG00000039005:mmu-miR-1b-5p,ENSMUSG00000033685:mmu-miR-1a-3p,ENSMUSG00000025980:mmu-miR-1a-3p,ENSMUSG00000017652:mmu-miR-16-5p,ENSMUSG00000016496:mmu-miR-16-5p,ENSMUSG00000049791:mmu-miR-19a-3p,ENS…
Biological Process	GO:0048608	reproductive structure development	31	791	3.66489e-09	1.09587e-07	ENSMUSG00000013663:mmu-miR-19a-3p,ENSMUSG00000013663:mmu-miR-19a-3p,ENSMUSG00000013663:mmu-miR-144-3p,ENSMUSG00000038227:mmu-miR-126a-3p,ENSMUSG00000040289:mmu-miR-451a,ENSMUSG00000089682:mmu-miR-16-5p,ENSMUSG00000021944:mmu-miR-1a-3p,ENSMUSG00000002068:mmu-miR-16-5p,ENSMUSG00000022952:mmu-miR-126a-3p,ENSMUSG00000030201:mmu-miR-19a-3p,ENSMUSG00000021549:mmu-miR-1a-3p,ENSMUSG00000003282:mmu-miR-1b…
Molecular Function	GO:0044212	transcription regulatory region DNA binding	43	1382	3.74556e-09	1.11578e-07	ENSMUSG00000000902:mmu-miR-1a-3p,ENSMUSG00000056493:mmu-miR-1b-5p,ENSMUSG00000009555:mmu-miR-1a-3p,ENSMUSG00000024401:mmu-miR-19a-3p,ENSMUSG00000038331:mmu-miR-1b-5p,ENSMUSG00000048251:mmu-miR-16-5p,ENSMUSG00000068457:mmu-miR-1b-5p,ENSMUSG00000024563:mmu-miR-140-3p,ENSMUSG00000023333:mmu-miR-1903,ENSMUSG00000041515:mmu-miR-451a,ENSMUSG00000038766:mmu-miR-1b-5p,ENSMUSG00000028271:mmu-miR-1a-3p,ENS…
Biological Process	GO:0009968	negative regulation of signal transduction	51	1818	3.90457e-09	1.15879e-07	ENSMUSG00000033307:mmu-miR-451a,ENSMUSG00000023951:mmu-miR-16-5p,ENSMUSG00000023951:mmu-miR-126a-3p,ENSMUSG00000039005:mmu-miR-1b-5p,ENSMUSG00000090935:mmu-miR-1903,ENSMUSG00000005533:mmu-miR-1a-3p,ENSMUSG00000041120:mmu-miR-1903,ENSMUSG00000021109:mmu-miR-144-3p,ENSMUSG00000042292:mmu-miR-1a-3p,ENSMUSG00000070867:mmu-miR-1903,ENSMUSG00000055116:mmu-miR-142a-3p,ENSMUSG00000022346:mmu-miR-451a,ENS…
Biological Process	GO:0010035	response to inorganic substance	40	1229	3.92963e-09	1.16188e-07	ENSMUSG00000048582:mmu-miR-19a-3p,ENSMUSG00000034957:mmu-miR-144-3p,ENSMUSG00000027087:mmu-miR-16-5p,ENSMUSG00000036438:mmu-miR-1a-3p,ENSMUSG00000003032:mmu-miR-1a-3p,ENSMUSG00000057329:mmu-miR-16-5p,ENSMUSG00000028890:mmu-miR-1b-5p,ENSMUSG00000029104:mmu-miR-1b-5p,ENSMUSG00000006678:mmu-miR-1a-3p,ENSMUSG00000027715:mmu-miR-1b-5p,ENSMUSG00000052684:mmu-miR-16-5p,ENSMUSG00000033658:mmu-miR-16-5p,E…
Molecular Function	GO:0000975	regulatory region DNA binding	43	1385	3.99162e-09	1.17582e-07	ENSMUSG00000048540:mmu-miR-1903,ENSMUSG00000024921:mmu-miR-142a-3p,ENSMUSG00000037395:mmu-miR-144-3p,ENSMUSG00000028717:mmu-miR-126a-3p,ENSMUSG00000021109:mmu-miR-144-3p,ENSMUSG00000042292:mmu-miR-1a-3p,ENSMUSG00000022528:mmu-miR-1a-3p,ENSMUSG00000020542:mmu-miR-1a-3p,ENSMUSG00000026313:mmu-miR-1a-3p,ENSMUSG00000055116:mmu-miR-142a-3p,ENSMUSG00000002111:mmu-miR-126a-3p,ENSMUSG00000022346:mmu-miR-…
Biological Process	GO:0016202	regulation of striated muscle tissue development	15	184	4.03782e-09	1.18502e-07	ENSMUSG00000020053:mmu-miR-1a-3p,ENSMUSG00000055116:mmu-miR-142a-3p,ENSMUSG00000050953:mmu-miR-1a-3p,ENSMUSG00000057329:mmu-miR-16-5p,ENSMUSG00000037225:mmu-miR-16-5p,ENSMUSG00000022306:mmu-miR-19a-3p,ENSMUSG00000013663:mmu-miR-19a-3p,ENSMUSG00000013663:mmu-miR-19a-3p,ENSMUSG00000013663:mmu-miR-144-3p,ENSMUSG00000026313:mmu-miR-1a-3p,ENSMUSG00000027852:mmu-miR-1b-5p,ENSMUSG00000030201:mmu-miR-19a…
Biological Process	GO:0009743	response to carbohydrate	24	495	4.08014e-09	1.19303e-07	ENSMUSG00000020053:mmu-miR-1a-3p,ENSMUSG00000022346:mmu-miR-451a,ENSMUSG00000057329:mmu-miR-16-5p,ENSMUSG00000013663:mmu-miR-19a-3p,ENSMUSG00000013663:mmu-miR-19a-3p,ENSMUSG00000013663:mmu-miR-144-3p,ENSMUSG00000034908:mmu-miR-451a,ENSMUSG00000021944:mmu-miR-1a-3p,ENSMUSG00000015605:mmu-miR-1a-3p,ENSMUSG00000078673:mmu-miR-1a-3p,ENSMUSG00000030557:mmu-miR-1a-3p,ENSMUSG00000027665:mmu-miR-1b-5p,EN…
Biological Process	GO:0006793	phosphorus metabolic process	111	5674	4.17729e-09	1.21694e-07	ENSMUSG00000034853:mmu-miR-1b-5p,ENSMUSG00000009900:mmu-miR-16-5p,ENSMUSG00000009555:mmu-miR-1a-3p,ENSMUSG00000027784:mmu-miR-451a,ENSMUSG00000032113:mmu-miR-1b-5p,ENSMUSG00000020272:mmu-miR-25-3p,ENSMUSG00000030729:mmu-miR-1b-5p,ENSMUSG00000058793:mmu-miR-1b-5p,ENSMUSG00000006699:mmu-miR-1a-3p,ENSMUSG00000027351:mmu-miR-144-3p,ENSMUSG00000027351:mmu-miR-126a-3p,ENSMUSG00000005268:mmu-miR-1903,EN…
Biological Process	GO:0012501	programmed cell death	89	4169	4.23401e-09	1.22895e-07	ENSMUSG00000032788:mmu-miR-1b-5p,ENSMUSG00000052684:mmu-miR-16-5p,ENSMUSG00000026012:mmu-miR-1b-5p,ENSMUSG00000003032:mmu-miR-1a-3p,ENSMUSG00000022285:mmu-miR-451a,ENSMUSG00000027490:mmu-miR-1b-5p,ENSMUSG00000060534:mmu-miR-1903,ENSMUSG00000030557:mmu-miR-1a-3p,ENSMUSG00000055204:mmu-miR-451a,ENSMUSG00000021549:mmu-miR-1a-3p,ENSMUSG00000050395:mmu-miR-1903,ENSMUSG00000028086:mmu-miR-25-3p,ENSMUSG…
Biological Process	GO:0061458	reproductive system development	31	798	4.50081e-09	1.30162e-07	ENSMUSG00000021256:mmu-miR-1903,ENSMUSG00000027087:mmu-miR-16-5p,ENSMUSG00000034957:mmu-miR-144-3p,ENSMUSG00000022346:mmu-miR-451a,ENSMUSG00000020053:mmu-miR-1a-3p,ENSMUSG00000057329:mmu-miR-16-5p,ENSMUSG00000052155:mmu-miR-1b-5p,ENSMUSG00000013663:mmu-miR-19a-3p,ENSMUSG00000013663:mmu-miR-19a-3p,ENSMUSG00000013663:mmu-miR-144-3p,ENSMUSG00000038227:mmu-miR-126a-3p,ENSMUSG00000022952:mmu-miR-126a-…
Molecular Function	GO:0001067	regulatory region nucleic acid binding	43	1392	4.62673e-09	1.33317e-07	ENSMUSG00000034957:mmu-miR-144-3p,ENSMUSG00000052684:mmu-miR-16-5p,ENSMUSG00000027210:mmu-let-7i-5p,ENSMUSG00000078619:mmu-miR-1a-3p,ENSMUSG00000026932:mmu-miR-1b-5p,ENSMUSG00000003032:mmu-miR-1a-3p,ENSMUSG00000028890:mmu-miR-1b-5p,ENSMUSG00000041515:mmu-miR-451a,ENSMUSG00000028271:mmu-miR-1a-3p,ENSMUSG00000027490:mmu-miR-1b-5p,ENSMUSG00000038766:mmu-miR-1b-5p,ENSMUSG00000030557:mmu-miR-1a-3p,ENS…
Biological Process	GO:0040012	regulation of locomotion	42	1340	4.66848e-09	1.34033e-07	ENSMUSG00000026193:mmu-miR-1a-3p,ENSMUSG00000026193:mmu-miR-140-3p,ENSMUSG00000037225:mmu-miR-16-5p,ENSMUSG00000023951:mmu-miR-16-5p,ENSMUSG00000023951:mmu-miR-126a-3p,ENSMUSG00000025586:mmu-miR-1a-3p,ENSMUSG00000025586:mmu-miR-25-3p,ENSMUSG00000033307:mmu-miR-451a,ENSMUSG00000050953:mmu-miR-1a-3p,ENSMUSG00000028517:mmu-miR-16-5p,ENSMUSG00000033792:mmu-miR-1b-5p,ENSMUSG00000016496:mmu-miR-16-5p,E…
Biological Process	GO:0051896	regulation of protein kinase B signaling	16	216	4.89535e-09	1.40039e-07	ENSMUSG00000005533:mmu-miR-1a-3p,ENSMUSG00000073830:mmu-miR-1a-3p,ENSMUSG00000024401:mmu-miR-19a-3p,ENSMUSG00000096688:mmu-miR-1a-3p,ENSMUSG00000096688:mmu-let-7i-5p,ENSMUSG00000073834:mmu-miR-1a-3p,ENSMUSG00000073834:mmu-let-7i-5p,ENSMUSG00000023951:mmu-miR-16-5p,ENSMUSG00000023951:mmu-miR-126a-3p,ENSMUSG00000078680:mmu-miR-1a-3p,ENSMUSG00000037225:mmu-miR-16-5p,ENSMUSG00000013663:mmu-miR-19a-3p…
Biological Process	GO:0006915	apoptotic process	88	4117	5.00221e-09	1.42581e-07	ENSMUSG00000023050:mmu-miR-19a-3p,ENSMUSG00000045362:mmu-let-7i-5p,ENSMUSG00000026193:mmu-miR-1a-3p,ENSMUSG00000026193:mmu-miR-140-3p,ENSMUSG00000037395:mmu-miR-144-3p,ENSMUSG00000054611:mmu-miR-19a-3p,ENSMUSG00000026234:mmu-miR-16-5p,ENSMUSG00000023951:mmu-miR-16-5p,ENSMUSG00000023951:mmu-miR-126a-3p,ENSMUSG00000042292:mmu-miR-1a-3p,ENSMUSG00000033792:mmu-miR-1b-5p,ENSMUSG00000026313:mmu-miR-1a-…
Biological Process	GO:1901861	regulation of muscle tissue development	15	187	5.03733e-09	1.43067e-07	ENSMUSG00000057329:mmu-miR-16-5p,ENSMUSG00000037225:mmu-miR-16-5p,ENSMUSG00000050953:mmu-miR-1a-3p,ENSMUSG00000055116:mmu-miR-142a-3p,ENSMUSG00000020053:mmu-miR-1a-3p,ENSMUSG00000027852:mmu-miR-1b-5p,ENSMUSG00000026313:mmu-miR-1a-3p,ENSMUSG00000030201:mmu-miR-19a-3p,ENSMUSG00000020542:mmu-miR-1a-3p,ENSMUSG00000048482:mmu-miR-1a-3p,ENSMUSG00000009900:mmu-miR-16-5p,ENSMUSG00000050697:mmu-miR-144-3p…
Biological Process	GO:0071322	cellular response to carbohydrate stimulus	19	314	5.13413e-09	1.45296e-07	ENSMUSG00000057329:mmu-miR-16-5p,ENSMUSG00000022346:mmu-miR-451a,ENSMUSG00000020053:mmu-miR-1a-3p,ENSMUSG00000094793:mmu-miR-1a-3p,ENSMUSG00000078673:mmu-miR-1a-3p,ENSMUSG00000030557:mmu-miR-1a-3p,ENSMUSG00000027665:mmu-miR-1b-5p,ENSMUSG00000021944:mmu-miR-1a-3p,ENSMUSG00000015605:mmu-miR-1a-3p,ENSMUSG00000034908:mmu-miR-451a,ENSMUSG00000026193:mmu-miR-1a-3p,ENSMUSG00000026193:mmu-miR-140-3p,ENSM…
Biological Process	GO:0032844	regulation of homeostatic process	32	849	5.1745e-09	1.45917e-07	ENSMUSG00000032035:mmu-miR-1a-3p,ENSMUSG00000025746:mmu-let-7i-5p,ENSMUSG00000025746:mmu-miR-142a-3p,ENSMUSG00000022346:mmu-miR-451a,ENSMUSG00000002111:mmu-miR-126a-3p,ENSMUSG00000078673:mmu-miR-1a-3p,ENSMUSG00000030201:mmu-miR-19a-3p,ENSMUSG00000034908:mmu-miR-451a,ENSMUSG00000037225:mmu-miR-16-5p,ENSMUSG00000025266:mmu-let-7i-5p,ENSMUSG00000050953:mmu-miR-1a-3p,ENSMUSG00000023951:mmu-miR-16-5p,…
Biological Process	GO:0007584	response to nutrient	22	425	5.63083e-09	1.58222e-07	ENSMUSG00000057329:mmu-miR-16-5p,ENSMUSG00000004099:mmu-miR-126a-3p,ENSMUSG00000034957:mmu-miR-144-3p,ENSMUSG00000020053:mmu-miR-1a-3p,ENSMUSG00000002068:mmu-miR-16-5p,ENSMUSG00000030201:mmu-miR-19a-3p,ENSMUSG00000021756:mmu-miR-142a-3p,ENSMUSG00000048482:mmu-miR-1a-3p,ENSMUSG00000015605:mmu-miR-1a-3p,ENSMUSG00000021944:mmu-miR-1a-3p,ENSMUSG00000033400:mmu-miR-1903,ENSMUSG00000062908:mmu-miR-19a-…
Biological Process	GO:0002791	regulation of peptide secretion	35	996	5.78832e-09	1.62073e-07	ENSMUSG00000039005:mmu-miR-1b-5p,ENSMUSG00000025980:mmu-miR-1a-3p,ENSMUSG00000017652:mmu-miR-16-5p,ENSMUSG00000033685:mmu-miR-1a-3p,ENSMUSG00000016496:mmu-miR-16-5p,ENSMUSG00000096688:mmu-miR-1a-3p,ENSMUSG00000096688:mmu-let-7i-5p,ENSMUSG00000057123:mmu-miR-144-3p,ENSMUSG00000073834:mmu-miR-1a-3p,ENSMUSG00000073834:mmu-let-7i-5p,ENSMUSG00000021109:mmu-miR-144-3p,ENSMUSG00000033307:mmu-miR-451a,EN…
Biological Process	GO:0006796	phosphate-containing compound metabolic process	109	5573	6.20062e-09	1.73006e-07	ENSMUSG00000041075:mmu-miR-1a-3p,ENSMUSG00000041075:mmu-miR-126a-3p,ENSMUSG00000036438:mmu-miR-1a-3p,ENSMUSG00000032788:mmu-miR-1b-5p,ENSMUSG00000003032:mmu-miR-1a-3p,ENSMUSG00000052684:mmu-miR-16-5p,ENSMUSG00000022788:mmu-miR-16-5p,ENSMUSG00000017466:mmu-miR-19a-3p,ENSMUSG00000028967:mmu-miR-126a-3p,ENSMUSG00000027852:mmu-miR-1b-5p,ENSMUSG00000021549:mmu-miR-1a-3p,ENSMUSG00000030557:mmu-miR-1a-3…
Biological Process	GO:0002790	peptide secretion	38	1151	6.7375e-09	1.87326e-07	ENSMUSG00000027273:mmu-miR-19a-3p,ENSMUSG00000003452:mmu-miR-16-5p,ENSMUSG00000031555:mmu-miR-126a-3p,ENSMUSG00000055980:mmu-miR-126a-3p,ENSMUSG00000025746:mmu-let-7i-5p,ENSMUSG00000025746:mmu-miR-142a-3p,ENSMUSG00000055116:mmu-miR-142a-3p,ENSMUSG00000061665:mmu-miR-142a-3p,ENSMUSG00000078673:mmu-miR-1a-3p,ENSMUSG00000034908:mmu-miR-451a,ENSMUSG00000015243:mmu-miR-144-3p,ENSMUSG00000026193:mmu-mi…
Biological Process	GO:1901654	response to ketone	29	722	6.92042e-09	1.91739e-07	ENSMUSG00000038227:mmu-miR-126a-3p,ENSMUSG00000028967:mmu-miR-126a-3p,ENSMUSG00000078673:mmu-miR-1a-3p,ENSMUSG00000027665:mmu-miR-1b-5p,ENSMUSG00000094793:mmu-miR-1a-3p,ENSMUSG00000001175:mmu-miR-1a-3p,ENSMUSG00000002068:mmu-miR-16-5p,ENSMUSG00000032788:mmu-miR-1b-5p,ENSMUSG00000061665:mmu-miR-142a-3p,ENSMUSG00000036438:mmu-miR-1a-3p,ENSMUSG00000034957:mmu-miR-144-3p,ENSMUSG00000020532:mmu-miR-45…
Biological Process	GO:0001666	response to hypoxia	28	678	6.9943e-09	1.93111e-07	ENSMUSG00000020542:mmu-miR-1a-3p,ENSMUSG00000024401:mmu-miR-19a-3p,ENSMUSG00000033792:mmu-miR-1b-5p,ENSMUSG00000050697:mmu-miR-144-3p,ENSMUSG00000050697:mmu-miR-451a,ENSMUSG00000021109:mmu-miR-144-3p,ENSMUSG00000054387:mmu-miR-16-5p,ENSMUSG00000033685:mmu-miR-1a-3p,ENSMUSG00000025980:mmu-miR-1a-3p,ENSMUSG00000020838:mmu-miR-16-5p,ENSMUSG00000041616:mmu-miR-1a-3p,ENSMUSG00000039005:mmu-miR-1b-5p,E…
Biological Process	GO:0009892	negative regulation of metabolic process	123	6592	7.41236e-09	2.03943e-07	ENSMUSG00000029104:mmu-miR-1b-5p,ENSMUSG00000057329:mmu-miR-16-5p,ENSMUSG00000006678:mmu-miR-1a-3p,ENSMUSG00000026932:mmu-miR-1b-5p,ENSMUSG00000025081:mmu-miR-1b-5p,ENSMUSG00000020053:mmu-miR-1a-3p,ENSMUSG00000032178:mmu-miR-19a-3p,ENSMUSG00000027087:mmu-miR-16-5p,ENSMUSG00000034957:mmu-miR-144-3p,ENSMUSG00000002068:mmu-miR-16-5p,ENSMUSG00000094793:mmu-miR-1a-3p,ENSMUSG00000001175:mmu-miR-1a-3p,E…
Biological Process	GO:0071333	cellular response to glucose stimulus	18	288	7.88815e-09	2.16283e-07	ENSMUSG00000026193:mmu-miR-1a-3p,ENSMUSG00000026193:mmu-miR-140-3p,ENSMUSG00000078680:mmu-miR-1a-3p,ENSMUSG00000096688:mmu-miR-1a-3p,ENSMUSG00000096688:mmu-let-7i-5p,ENSMUSG00000073834:mmu-miR-1a-3p,ENSMUSG00000073834:mmu-let-7i-5p,ENSMUSG00000021109:mmu-miR-144-3p,ENSMUSG00000005533:mmu-miR-1a-3p,ENSMUSG00000033685:mmu-miR-1a-3p,ENSMUSG00000000902:mmu-miR-1a-3p,ENSMUSG00000073830:mmu-miR-1a-3p,E…
Biological Process	GO:0035051	cardiocyte differentiation	16	224	8.23143e-09	2.24144e-07	ENSMUSG00000020053:mmu-miR-1a-3p,ENSMUSG00000038193:mmu-miR-1a-3p,ENSMUSG00000004872:mmu-miR-1a-3p,ENSMUSG00000027276:mmu-miR-16-5p,ENSMUSG00000062908:mmu-miR-19a-3p,ENSMUSG00000015605:mmu-miR-1a-3p,ENSMUSG00000021944:mmu-miR-1a-3p,ENSMUSG00000030557:mmu-miR-1a-3p,ENSMUSG00000030201:mmu-miR-19a-3p,ENSMUSG00000017491:mmu-miR-1a-3p,ENSMUSG00000023951:mmu-miR-16-5p,ENSMUSG00000023951:mmu-miR-126a-3p…
Biological Process	GO:0043523	regulation of neuron apoptotic process	22	434	8.22383e-09	2.24144e-07	ENSMUSG00000021109:mmu-miR-144-3p,ENSMUSG00000033792:mmu-miR-1b-5p,ENSMUSG00000026313:mmu-miR-1a-3p,ENSMUSG00000024401:mmu-miR-19a-3p,ENSMUSG00000027993:mmu-miR-16-5p,ENSMUSG00000006699:mmu-miR-1a-3p,ENSMUSG00000025980:mmu-miR-1a-3p,ENSMUSG00000020423:mmu-miR-25-3p,ENSMUSG00000020099:mmu-miR-1b-5p,ENSMUSG00000023050:mmu-miR-19a-3p,ENSMUSG00000028086:mmu-miR-25-3p,ENSMUSG00000023951:mmu-miR-16-5p,…
Biological Process	GO:0071331	cellular response to hexose stimulus	18	291	9.26628e-09	2.49748e-07	ENSMUSG00000034908:mmu-miR-451a,ENSMUSG00000094793:mmu-miR-1a-3p,ENSMUSG00000078673:mmu-miR-1a-3p,ENSMUSG00000027665:mmu-miR-1b-5p,ENSMUSG00000030557:mmu-miR-1a-3p,ENSMUSG00000021944:mmu-miR-1a-3p,ENSMUSG00000015605:mmu-miR-1a-3p,ENSMUSG00000020053:mmu-miR-1a-3p,ENSMUSG00000057329:mmu-miR-16-5p,ENSMUSG00000005533:mmu-miR-1a-3p,ENSMUSG00000073830:mmu-miR-1a-3p,ENSMUSG00000033685:mmu-miR-1a-3p,ENSM…
Cellular Component	GO:0045121	membrane raft	27	643	9.25134e-09	2.49748e-07	ENSMUSG00000050953:mmu-miR-1a-3p,ENSMUSG00000030525:mmu-miR-19a-3p,ENSMUSG00000026029:mmu-miR-1b-5p,ENSMUSG00000000001:mmu-miR-451a,ENSMUSG00000027351:mmu-miR-144-3p,ENSMUSG00000027351:mmu-miR-126a-3p,ENSMUSG00000015243:mmu-miR-144-3p,ENSMUSG00000030162:mmu-miR-142a-3p,ENSMUSG00000020099:mmu-miR-1b-5p,ENSMUSG00000039005:mmu-miR-1b-5p,ENSMUSG00000005533:mmu-miR-1a-3p,ENSMUSG00000020838:mmu-miR-16-…
Cellular Component	GO:0098857	membrane microdomain	27	643	9.25134e-09	2.49748e-07	ENSMUSG00000030302:mmu-let-7i-5p,ENSMUSG00000033792:mmu-miR-1b-5p,ENSMUSG00000024401:mmu-miR-19a-3p,ENSMUSG00000031483:mmu-miR-16-5p,ENSMUSG00000005533:mmu-miR-1a-3p,ENSMUSG00000039005:mmu-miR-1b-5p,ENSMUSG00000025980:mmu-miR-1a-3p,ENSMUSG00000020838:mmu-miR-16-5p,ENSMUSG00000030162:mmu-miR-142a-3p,ENSMUSG00000020099:mmu-miR-1b-5p,ENSMUSG00000000001:mmu-miR-451a,ENSMUSG00000026029:mmu-miR-1b-5p,E…
Biological Process	GO:0051091	positive regulation of sequence-specific DNA binding transcription factor activity	22	438	9.7004e-09	2.59682e-07	ENSMUSG00000030744:mmu-miR-1b-5p,ENSMUSG00000037523:mmu-miR-1b-5p,ENSMUSG00000023951:mmu-miR-16-5p,ENSMUSG00000023951:mmu-miR-126a-3p,ENSMUSG00000049791:mmu-miR-19a-3p,ENSMUSG00000026313:mmu-miR-1a-3p,ENSMUSG00000024401:mmu-miR-19a-3p,ENSMUSG00000028517:mmu-miR-16-5p,ENSMUSG00000020542:mmu-miR-1a-3p,ENSMUSG00000009900:mmu-miR-16-5p,ENSMUSG00000027164:mmu-miR-144-3p,ENSMUSG00000039005:mmu-miR-1b-5…
Biological Process	GO:0051384	response to glucocorticoid	22	438	9.7004e-09	2.59682e-07	ENSMUSG00000021109:mmu-miR-144-3p,ENSMUSG00000066551:mmu-miR-142a-3p,ENSMUSG00000024401:mmu-miR-19a-3p,ENSMUSG00000025980:mmu-miR-1a-3p,ENSMUSG00000039005:mmu-miR-1b-5p,ENSMUSG00000070348:mmu-miR-16-5p,ENSMUSG00000026193:mmu-miR-1a-3p,ENSMUSG00000026193:mmu-miR-140-3p,ENSMUSG00000023951:mmu-miR-16-5p,ENSMUSG00000023951:mmu-miR-126a-3p,ENSMUSG00000033307:mmu-miR-451a,ENSMUSG00000027665:mmu-miR-1b-…
Biological Process	GO:0001816	cytokine production	39	1219	9.90015e-09	2.6358e-07	ENSMUSG00000005364:mmu-miR-25-3p,ENSMUSG00000016496:mmu-miR-16-5p,ENSMUSG00000021109:mmu-miR-144-3p,ENSMUSG00000025980:mmu-miR-1a-3p,ENSMUSG00000017652:mmu-miR-16-5p,ENSMUSG00000039005:mmu-miR-1b-5p,ENSMUSG00000015243:mmu-miR-144-3p,ENSMUSG00000026193:mmu-miR-1a-3p,ENSMUSG00000026193:mmu-miR-140-3p,ENSMUSG00000033307:mmu-miR-451a,ENSMUSG00000026234:mmu-miR-16-5p,ENSMUSG00000021756:mmu-miR-142a-3p…
Molecular Function	GO:0003690	double-stranded DNA binding	43	1429	9.91252e-09	2.6358e-07	ENSMUSG00000000902:mmu-miR-1a-3p,ENSMUSG00000056493:mmu-miR-1b-5p,ENSMUSG00000066568:mmu-miR-451a,ENSMUSG00000066551:mmu-miR-142a-3p,ENSMUSG00000009555:mmu-miR-1a-3p,ENSMUSG00000026434:mmu-miR-451a,ENSMUSG00000068457:mmu-miR-1b-5p,ENSMUSG00000048251:mmu-miR-16-5p,ENSMUSG00000038331:mmu-miR-1b-5p,ENSMUSG00000024563:mmu-miR-140-3p,ENSMUSG00000030744:mmu-miR-1b-5p,ENSMUSG00000023333:mmu-miR-1903,ENS…
Biological Process	GO:0009914	hormone transport	25	560	1.00188e-08	2.65514e-07	ENSMUSG00000030557:mmu-miR-1a-3p,ENSMUSG00000078673:mmu-miR-1a-3p,ENSMUSG00000022952:mmu-miR-126a-3p,ENSMUSG00000094793:mmu-miR-1a-3p,ENSMUSG00000021756:mmu-miR-142a-3p,ENSMUSG00000022285:mmu-miR-451a,ENSMUSG00000034908:mmu-miR-451a,ENSMUSG00000055980:mmu-miR-126a-3p,ENSMUSG00000052155:mmu-miR-1b-5p,ENSMUSG00000027273:mmu-miR-19a-3p,ENSMUSG00000029104:mmu-miR-1b-5p,ENSMUSG00000025746:mmu-let-7i-5…
Biological Process	GO:0071229	cellular response to acid chemical	20	364	1.0379e-08	2.74143e-07	ENSMUSG00000025586:mmu-miR-1a-3p,ENSMUSG00000025586:mmu-miR-25-3p,ENSMUSG00000026193:mmu-miR-1a-3p,ENSMUSG00000026193:mmu-miR-140-3p,ENSMUSG00000015243:mmu-miR-144-3p,ENSMUSG00000039005:mmu-miR-1b-5p,ENSMUSG00000020838:mmu-miR-16-5p,ENSMUSG00000049791:mmu-miR-19a-3p,ENSMUSG00000033792:mmu-miR-1b-5p,ENSMUSG00000024401:mmu-miR-19a-3p,ENSMUSG00000050697:mmu-miR-144-3p,ENSMUSG00000050697:mmu-miR-451a…
Biological Process	GO:0007049	cell cycle	68	2892	1.09674e-08	2.88722e-07	ENSMUSG00000022892:mmu-miR-16-5p,ENSMUSG00000001855:mmu-let-7i-5p,ENSMUSG00000025860:mmu-miR-451a,ENSMUSG00000030201:mmu-miR-19a-3p,ENSMUSG00000022346:mmu-miR-451a,ENSMUSG00000055116:mmu-miR-142a-3p,ENSMUSG00000020838:mmu-miR-16-5p,ENSMUSG00000005533:mmu-miR-1a-3p,ENSMUSG00000060314:mmu-miR-1b-5p,ENSMUSG00000000001:mmu-miR-451a,ENSMUSG00000020315:mmu-miR-144-3p,ENSMUSG00000001175:mmu-miR-1a-3p,EN…
Biological Process	GO:0031960	response to corticosteroid	23	481	1.11654e-08	2.92962e-07	ENSMUSG00000062908:mmu-miR-19a-3p,ENSMUSG00000028967:mmu-miR-126a-3p,ENSMUSG00000033400:mmu-miR-1903,ENSMUSG00000027665:mmu-miR-1b-5p,ENSMUSG00000040289:mmu-miR-451a,ENSMUSG00000001175:mmu-miR-1a-3p,ENSMUSG00000002068:mmu-miR-16-5p,ENSMUSG00000020053:mmu-miR-1a-3p,ENSMUSG00000036438:mmu-miR-1a-3p,ENSMUSG00000034957:mmu-miR-144-3p,ENSMUSG00000031555:mmu-miR-126a-3p,ENSMUSG00000057329:mmu-miR-16-5p…
Biological Process	GO:0071326	cellular response to monosaccharide stimulus	18	295	1.14492e-08	2.99418e-07	ENSMUSG00000057329:mmu-miR-16-5p,ENSMUSG00000020053:mmu-miR-1a-3p,ENSMUSG00000078673:mmu-miR-1a-3p,ENSMUSG00000027665:mmu-miR-1b-5p,ENSMUSG00000030557:mmu-miR-1a-3p,ENSMUSG00000021944:mmu-miR-1a-3p,ENSMUSG00000015605:mmu-miR-1a-3p,ENSMUSG00000094793:mmu-miR-1a-3p,ENSMUSG00000034908:mmu-miR-451a,ENSMUSG00000026193:mmu-miR-1a-3p,ENSMUSG00000026193:mmu-miR-140-3p,ENSMUSG00000078680:mmu-miR-1a-3p,ENS…
Biological Process	GO:0001817	regulation of cytokine production	37	1130	1.3324e-08	3.47301e-07	ENSMUSG00000021756:mmu-miR-142a-3p,ENSMUSG00000021944:mmu-miR-1a-3p,ENSMUSG00000027104:mmu-miR-1b-5p,ENSMUSG00000027104:mmu-miR-451a,ENSMUSG00000029816:mmu-miR-1903,ENSMUSG00000061665:mmu-miR-142a-3p,ENSMUSG00000025746:mmu-let-7i-5p,ENSMUSG00000025746:mmu-miR-142a-3p,ENSMUSG00000003452:mmu-miR-16-5p,ENSMUSG00000017652:mmu-miR-16-5p,ENSMUSG00000025980:mmu-miR-1a-3p,ENSMUSG00000039005:mmu-miR-1b-5p…
Molecular Function	GO:0042826	histone deacetylase binding	16	233	1.43898e-08	3.73852e-07	ENSMUSG00000023333:mmu-miR-1903,ENSMUSG00000070348:mmu-miR-16-5p,ENSMUSG00000027164:mmu-miR-144-3p,ENSMUSG00000028717:mmu-miR-126a-3p,ENSMUSG00000090877:mmu-miR-1a-3p,ENSMUSG00000026313:mmu-miR-1a-3p,ENSMUSG00000020542:mmu-miR-1a-3p,ENSMUSG00000022528:mmu-miR-1a-3p,ENSMUSG00000021109:mmu-miR-144-3p,ENSMUSG00000034957:mmu-miR-144-3p,ENSMUSG00000003032:mmu-miR-1a-3p,ENSMUSG00000026932:mmu-miR-1b-5p…
Biological Process	GO:0070848	response to growth factor	38	1186	1.48899e-08	3.8558e-07	ENSMUSG00000006678:mmu-miR-1a-3p,ENSMUSG00000027210:mmu-let-7i-5p,ENSMUSG00000003032:mmu-miR-1a-3p,ENSMUSG00000027715:mmu-miR-1b-5p,ENSMUSG00000052684:mmu-miR-16-5p,ENSMUSG00000052155:mmu-miR-1b-5p,ENSMUSG00000022952:mmu-miR-126a-3p,ENSMUSG00000021549:mmu-miR-1a-3p,ENSMUSG00000048482:mmu-miR-1a-3p,ENSMUSG00000027490:mmu-miR-1b-5p,ENSMUSG00000008590:mmu-miR-1903,ENSMUSG00000028967:mmu-miR-126a-3p,…
Cellular Component	GO:0098590	plasma membrane region	44	1505	1.5327e-08	3.95605e-07	ENSMUSG00000005533:mmu-miR-1a-3p,ENSMUSG00000033792:mmu-miR-1b-5p,ENSMUSG00000030302:mmu-let-7i-5p,ENSMUSG00000039166:mmu-miR-1b-5p,ENSMUSG00000039579:mmu-miR-451a,ENSMUSG00000025586:mmu-miR-1a-3p,ENSMUSG00000025586:mmu-miR-25-3p,ENSMUSG00000050953:mmu-miR-1a-3p,ENSMUSG00000026193:mmu-miR-1a-3p,ENSMUSG00000026193:mmu-miR-140-3p,ENSMUSG00000022505:mmu-miR-1903,ENSMUSG00000013663:mmu-miR-19a-3p,ENS…
Biological Process	GO:0035295	tube development	36	1087	1.5856e-08	4.07931e-07	ENSMUSG00000040289:mmu-miR-451a,ENSMUSG00000015605:mmu-miR-1a-3p,ENSMUSG00000021944:mmu-miR-1a-3p,ENSMUSG00000045515:mmu-miR-140-3p,ENSMUSG00000030201:mmu-miR-19a-3p,ENSMUSG00000017491:mmu-miR-1a-3p,ENSMUSG00000038193:mmu-miR-1a-3p,ENSMUSG00000022346:mmu-miR-451a,ENSMUSG00000004872:mmu-miR-1a-3p,ENSMUSG00000027276:mmu-miR-16-5p,ENSMUSG00000022306:mmu-miR-19a-3p,ENSMUSG00000057123:mmu-miR-144-3p,E…
Cellular Component	GO:0043005	neuron projection	58	2312	1.69748e-08	4.35302e-07	ENSMUSG00000029104:mmu-miR-1b-5p,ENSMUSG00000025867:mmu-miR-1903,ENSMUSG00000036438:mmu-miR-1a-3p,ENSMUSG00000000560:mmu-miR-1b-5p,ENSMUSG00000019647:mmu-miR-142a-3p,ENSMUSG00000005958:mmu-miR-1b-5p,ENSMUSG00000060534:mmu-miR-1903,ENSMUSG00000048482:mmu-miR-1a-3p,ENSMUSG00000019775:mmu-miR-1903,ENSMUSG00000001175:mmu-miR-1a-3p,ENSMUSG00000062908:mmu-miR-19a-3p,ENSMUSG00000008590:mmu-miR-1903,ENSM…
Biological Process	GO:0036293	response to decreased oxygen levels	28	707	1.70936e-08	4.36934e-07	ENSMUSG00000020542:mmu-miR-1a-3p,ENSMUSG00000024401:mmu-miR-19a-3p,ENSMUSG00000033792:mmu-miR-1b-5p,ENSMUSG00000050697:mmu-miR-144-3p,ENSMUSG00000050697:mmu-miR-451a,ENSMUSG00000021109:mmu-miR-144-3p,ENSMUSG00000054387:mmu-miR-16-5p,ENSMUSG00000033685:mmu-miR-1a-3p,ENSMUSG00000020838:mmu-miR-16-5p,ENSMUSG00000025980:mmu-miR-1a-3p,ENSMUSG00000039005:mmu-miR-1b-5p,ENSMUSG00000041616:mmu-miR-1a-3p,E…
Biological Process	GO:0090257	regulation of muscle system process	18	303	1.72977e-08	4.40729e-07	ENSMUSG00000003032:mmu-miR-1a-3p,ENSMUSG00000038193:mmu-miR-1a-3p,ENSMUSG00000036438:mmu-miR-1a-3p,ENSMUSG00000020053:mmu-miR-1a-3p,ENSMUSG00000022952:mmu-miR-126a-3p,ENSMUSG00000021756:mmu-miR-142a-3p,ENSMUSG00000001175:mmu-miR-1a-3p,ENSMUSG00000030557:mmu-miR-1a-3p,ENSMUSG00000021944:mmu-miR-1a-3p,ENSMUSG00000015605:mmu-miR-1a-3p,ENSMUSG00000028967:mmu-miR-126a-3p,ENSMUSG00000027716:mmu-miR-451…
Biological Process	GO:0001819	positive regulation of cytokine production	29	753	1.73568e-08	4.4082e-07	ENSMUSG00000027104:mmu-miR-1b-5p,ENSMUSG00000027104:mmu-miR-451a,ENSMUSG00000026012:mmu-miR-1b-5p,ENSMUSG00000025746:mmu-let-7i-5p,ENSMUSG00000025746:mmu-miR-142a-3p,ENSMUSG00000020315:mmu-miR-144-3p,ENSMUSG00000041515:mmu-miR-451a,ENSMUSG00000021944:mmu-miR-1a-3p,ENSMUSG00000055204:mmu-miR-451a,ENSMUSG00000022952:mmu-miR-126a-3p,ENSMUSG00000027852:mmu-miR-1b-5p,ENSMUSG00000021756:mmu-miR-142a-3p…
Biological Process	GO:0071363	cellular response to growth factor stimulus	37	1145	1.87158e-08	4.73816e-07	ENSMUSG00000030744:mmu-miR-1b-5p,ENSMUSG00000024563:mmu-miR-140-3p,ENSMUSG00000029661:mmu-let-7i-5p,ENSMUSG00000009900:mmu-miR-16-5p,ENSMUSG00000052684:mmu-miR-16-5p,ENSMUSG00000027715:mmu-miR-1b-5p,ENSMUSG00000052155:mmu-miR-1b-5p,ENSMUSG00000006678:mmu-miR-1a-3p,ENSMUSG00000003032:mmu-miR-1a-3p,ENSMUSG00000048482:mmu-miR-1a-3p,ENSMUSG00000022952:mmu-miR-126a-3p,ENSMUSG00000021549:mmu-miR-1a-3p,…
Biological Process	GO:0001501	skeletal system development	27	672	2.3043e-08	5.81506e-07	ENSMUSG00000020053:mmu-miR-1a-3p,ENSMUSG00000002881:mmu-miR-1903,ENSMUSG00000038193:mmu-miR-1a-3p,ENSMUSG00000022346:mmu-miR-451a,ENSMUSG00000052155:mmu-miR-1b-5p,ENSMUSG00000027210:mmu-let-7i-5p,ENSMUSG00000038227:mmu-miR-126a-3p,ENSMUSG00000015605:mmu-miR-1a-3p,ENSMUSG00000022952:mmu-miR-126a-3p,ENSMUSG00000017491:mmu-miR-1a-3p,ENSMUSG00000030201:mmu-miR-19a-3p,ENSMUSG00000038331:mmu-miR-1b-5p,…
Biological Process	GO:0046879	hormone secretion	24	542	2.31601e-08	5.82606e-07	ENSMUSG00000055116:mmu-miR-142a-3p,ENSMUSG00000055980:mmu-miR-126a-3p,ENSMUSG00000052155:mmu-miR-1b-5p,ENSMUSG00000027273:mmu-miR-19a-3p,ENSMUSG00000029104:mmu-miR-1b-5p,ENSMUSG00000025746:mmu-let-7i-5p,ENSMUSG00000025746:mmu-miR-142a-3p,ENSMUSG00000022285:mmu-miR-451a,ENSMUSG00000034908:mmu-miR-451a,ENSMUSG00000078673:mmu-miR-1a-3p,ENSMUSG00000030557:mmu-miR-1a-3p,ENSMUSG00000022952:mmu-miR-126a…
Biological Process	GO:0071840	cellular component organization or biogenesis	194	12234	2.33448e-08	5.85393e-07	ENSMUSG00000006699:mmu-miR-1a-3p,ENSMUSG00000073830:mmu-miR-1a-3p,ENSMUSG00000024384:mmu-miR-1b-5p,ENSMUSG00000032113:mmu-miR-1b-5p,ENSMUSG00000060206:mmu-miR-1b-5p,ENSMUSG00000037541:mmu-miR-451a,ENSMUSG00000028849:mmu-miR-144-3p,ENSMUSG00000027712:mmu-miR-1a-3p,ENSMUSG00000030223:mmu-miR-1903,ENSMUSG00000038331:mmu-miR-1b-5p,ENSMUSG00000025104:mmu-miR-144-3p,ENSMUSG00000037523:mmu-miR-1b-5p,ENS…
Biological Process	GO:0043410	positive regulation of MAPK cascade	32	906	2.37284e-08	5.9127e-07	ENSMUSG00000049791:mmu-miR-19a-3p,ENSMUSG00000005533:mmu-miR-1a-3p,ENSMUSG00000039005:mmu-miR-1b-5p,ENSMUSG00000017652:mmu-miR-16-5p,ENSMUSG00000037225:mmu-miR-16-5p,ENSMUSG00000023050:mmu-miR-19a-3p,ENSMUSG00000045362:mmu-let-7i-5p,ENSMUSG00000033307:mmu-miR-451a,ENSMUSG00000023951:mmu-miR-16-5p,ENSMUSG00000023951:mmu-miR-126a-3p,ENSMUSG00000021944:mmu-miR-1a-3p,ENSMUSG00000013663:mmu-miR-19a-3p…
Biological Process	GO:0050673	epithelial cell proliferation	28	718	2.36793e-08	5.9127e-07	ENSMUSG00000066551:mmu-miR-142a-3p,ENSMUSG00000022528:mmu-miR-1a-3p,ENSMUSG00000009900:mmu-miR-16-5p,ENSMUSG00000024401:mmu-miR-19a-3p,ENSMUSG00000033792:mmu-miR-1b-5p,ENSMUSG00000090935:mmu-miR-1903,ENSMUSG00000006699:mmu-miR-1a-3p,ENSMUSG00000037225:mmu-miR-16-5p,ENSMUSG00000070348:mmu-miR-16-5p,ENSMUSG00000050953:mmu-miR-1a-3p,ENSMUSG00000048251:mmu-miR-16-5p,ENSMUSG00000028086:mmu-miR-25-3p,E…
Biological Process	GO:0051897	positive regulation of protein kinase B signaling	13	153	2.68895e-08	6.67939e-07	ENSMUSG00000037225:mmu-miR-16-5p,ENSMUSG00000025746:mmu-let-7i-5p,ENSMUSG00000025746:mmu-miR-142a-3p,ENSMUSG00000026012:mmu-miR-1b-5p,ENSMUSG00000020053:mmu-miR-1a-3p,ENSMUSG00000078680:mmu-miR-1a-3p,ENSMUSG00000023951:mmu-miR-16-5p,ENSMUSG00000023951:mmu-miR-126a-3p,ENSMUSG00000078673:mmu-miR-1a-3p,ENSMUSG00000073834:mmu-miR-1a-3p,ENSMUSG00000073834:mmu-let-7i-5p,ENSMUSG00000096688:mmu-miR-1a-3p…
Biological Process	GO:0000904	cell morphogenesis involved in differentiation	37	1162	2.72902e-08	6.75774e-07	ENSMUSG00000035764:mmu-miR-1b-5p,ENSMUSG00000027273:mmu-miR-19a-3p,ENSMUSG00000068327:mmu-miR-1a-3p,ENSMUSG00000030201:mmu-miR-19a-3p,ENSMUSG00000015605:mmu-miR-1a-3p,ENSMUSG00000022892:mmu-miR-16-5p,ENSMUSG00000013663:mmu-miR-19a-3p,ENSMUSG00000013663:mmu-miR-19a-3p,ENSMUSG00000013663:mmu-miR-144-3p,ENSMUSG00000026193:mmu-miR-1a-3p,ENSMUSG00000026193:mmu-miR-140-3p,ENSMUSG00000051650:mmu-miR-1b-…
Biological Process	GO:0051090	regulation of sequence-specific DNA binding transcription factor activity	26	634	2.808e-08	6.93166e-07	ENSMUSG00000009900:mmu-miR-16-5p,ENSMUSG00000049791:mmu-miR-19a-3p,ENSMUSG00000024401:mmu-miR-19a-3p,ENSMUSG00000026313:mmu-miR-1a-3p,ENSMUSG00000020542:mmu-miR-1a-3p,ENSMUSG00000028517:mmu-miR-16-5p,ENSMUSG00000031392:mmu-miR-142a-3p,ENSMUSG00000090877:mmu-miR-1a-3p,ENSMUSG00000039005:mmu-miR-1b-5p,ENSMUSG00000005533:mmu-miR-1a-3p,ENSMUSG00000017652:mmu-miR-16-5p,ENSMUSG00000000902:mmu-miR-1a-3p…
Biological Process	GO:0051223	regulation of protein transport	46	1648	2.81782e-08	6.93429e-07	ENSMUSG00000022967:mmu-let-7i-5p,ENSMUSG00000027712:mmu-miR-1a-3p,ENSMUSG00000024401:mmu-miR-19a-3p,ENSMUSG00000009900:mmu-miR-16-5p,ENSMUSG00000054387:mmu-miR-16-5p,ENSMUSG00000066551:mmu-miR-142a-3p,ENSMUSG00000027164:mmu-miR-144-3p,ENSMUSG00000073830:mmu-miR-1a-3p,ENSMUSG00000024384:mmu-miR-1b-5p,ENSMUSG00000006699:mmu-miR-1a-3p,ENSMUSG00000032076:mmu-miR-16-5p,ENSMUSG00000050395:mmu-miR-1903,…
Biological Process	GO:0030900	forebrain development	26	635	2.89748e-08	7.10825e-07	ENSMUSG00000037225:mmu-miR-16-5p,ENSMUSG00000048251:mmu-miR-16-5p,ENSMUSG00000038331:mmu-miR-1b-5p,ENSMUSG00000033792:mmu-miR-1b-5p,ENSMUSG00000042292:mmu-miR-1a-3p,ENSMUSG00000022528:mmu-miR-1a-3p,ENSMUSG00000009900:mmu-miR-16-5p,ENSMUSG00000021109:mmu-miR-144-3p,ENSMUSG00000020423:mmu-miR-25-3p,ENSMUSG00000020838:mmu-miR-16-5p,ENSMUSG00000005533:mmu-miR-1a-3p,ENSMUSG00000035764:mmu-miR-1b-5p,EN…
Biological Process	GO:0051051	negative regulation of transport	30	823	3.31491e-08	8.0976e-07	ENSMUSG00000094793:mmu-miR-1a-3p,ENSMUSG00000001175:mmu-miR-1a-3p,ENSMUSG00000078673:mmu-miR-1a-3p,ENSMUSG00000030557:mmu-miR-1a-3p,ENSMUSG00000013663:mmu-miR-19a-3p,ENSMUSG00000013663:mmu-miR-19a-3p,ENSMUSG00000013663:mmu-miR-144-3p,ENSMUSG00000057329:mmu-miR-16-5p,ENSMUSG00000025746:mmu-let-7i-5p,ENSMUSG00000025746:mmu-miR-142a-3p,ENSMUSG00000020135:mmu-let-7i-5p,ENSMUSG00000055980:mmu-miR-126a…
Biological Process	GO:1905114	cell surface receptor signaling pathway involved in cell-cell signaling	29	776	3.3212e-08	8.0976e-07	ENSMUSG00000073563:mmu-miR-1b-5p,ENSMUSG00000040752:mmu-miR-1a-3p,ENSMUSG00000037225:mmu-miR-16-5p,ENSMUSG00000070348:mmu-miR-16-5p,ENSMUSG00000030223:mmu-miR-1903,ENSMUSG00000068457:mmu-miR-1b-5p,ENSMUSG00000030525:mmu-miR-19a-3p,ENSMUSG00000049791:mmu-miR-19a-3p,ENSMUSG00000070867:mmu-miR-1903,ENSMUSG00000028517:mmu-miR-16-5p,ENSMUSG00000050697:mmu-miR-144-3p,ENSMUSG00000050697:mmu-miR-451a,ENS…
Biological Process	GO:0048863	stem cell differentiation	18	317	3.45064e-08	8.36174e-07	ENSMUSG00000021944:mmu-miR-1a-3p,ENSMUSG00000019647:mmu-miR-142a-3p,ENSMUSG00000015605:mmu-miR-1a-3p,ENSMUSG00000030201:mmu-miR-19a-3p,ENSMUSG00000054272:mmu-miR-1b-5p,ENSMUSG00000004872:mmu-miR-1a-3p,ENSMUSG00000090714:mmu-miR-1b-5p,ENSMUSG00000027276:mmu-miR-16-5p,ENSMUSG00000038193:mmu-miR-1a-3p,ENSMUSG00000009900:mmu-miR-16-5p,ENSMUSG00000021109:mmu-miR-144-3p,ENSMUSG00000022528:mmu-miR-1a-3p…
Biological Process	GO:0051101	regulation of DNA binding	18	317	3.45064e-08	8.36174e-07	ENSMUSG00000040289:mmu-miR-451a,ENSMUSG00000001175:mmu-miR-1a-3p,ENSMUSG00000027490:mmu-miR-1b-5p,ENSMUSG00000052684:mmu-miR-16-5p,ENSMUSG00000003032:mmu-miR-1a-3p,ENSMUSG00000020053:mmu-miR-1a-3p,ENSMUSG00000036438:mmu-miR-1a-3p,ENSMUSG00000022346:mmu-miR-451a,ENSMUSG00000038193:mmu-miR-1a-3p,ENSMUSG00000022528:mmu-miR-1a-3p,ENSMUSG00000009900:mmu-miR-16-5p,ENSMUSG00000066551:mmu-miR-142a-3p,ENS…
Biological Process	GO:0051093	negative regulation of developmental process	47	1716	3.47122e-08	8.38595e-07	ENSMUSG00000023951:mmu-miR-16-5p,ENSMUSG00000023951:mmu-miR-126a-3p,ENSMUSG00000033307:mmu-miR-451a,ENSMUSG00000050953:mmu-miR-1a-3p,ENSMUSG00000022306:mmu-miR-19a-3p,ENSMUSG00000020838:mmu-miR-16-5p,ENSMUSG00000090935:mmu-miR-1903,ENSMUSG00000020542:mmu-miR-1a-3p,ENSMUSG00000026313:mmu-miR-1a-3p,ENSMUSG00000021109:mmu-miR-144-3p,ENSMUSG00000022528:mmu-miR-1a-3p,ENSMUSG00000022346:mmu-miR-451a,EN…
Biological Process	GO:0048871	multicellular organismal homeostasis	24	554	3.49565e-08	8.41931e-07	ENSMUSG00000020532:mmu-miR-451a,ENSMUSG00000027087:mmu-miR-16-5p,ENSMUSG00000057329:mmu-miR-16-5p,ENSMUSG00000025746:mmu-let-7i-5p,ENSMUSG00000025746:mmu-miR-142a-3p,ENSMUSG00000026417:mmu-miR-1903,ENSMUSG00000015605:mmu-miR-1a-3p,ENSMUSG00000078673:mmu-miR-1a-3p,ENSMUSG00000027665:mmu-miR-1b-5p,ENSMUSG00000094793:mmu-miR-1a-3p,ENSMUSG00000062202:mmu-miR-1903,ENSMUSG00000030201:mmu-miR-19a-3p,ENS…
Biological Process	GO:0009611	response to wounding	36	1124	3.67062e-08	8.81393e-07	ENSMUSG00000006699:mmu-miR-1a-3p,ENSMUSG00000074743:mmu-miR-451a,ENSMUSG00000027712:mmu-miR-1a-3p,ENSMUSG00000009900:mmu-miR-16-5p,ENSMUSG00000066551:mmu-miR-142a-3p,ENSMUSG00000040242:mmu-miR-19a-3p,ENSMUSG00000009207:mmu-miR-142a-3p,ENSMUSG00000022285:mmu-miR-451a,ENSMUSG00000041075:mmu-miR-1a-3p,ENSMUSG00000041075:mmu-miR-126a-3p,ENSMUSG00000021256:mmu-miR-1903,ENSMUSG00000020053:mmu-miR-1a-3p…
Biological Process	GO:0002009	morphogenesis of an epithelium	30	831	4.09753e-08	9.77977e-07	ENSMUSG00000023951:mmu-miR-16-5p,ENSMUSG00000023951:mmu-miR-126a-3p,ENSMUSG00000050953:mmu-miR-1a-3p,ENSMUSG00000054611:mmu-miR-19a-3p,ENSMUSG00000023333:mmu-miR-1903,ENSMUSG00000026029:mmu-miR-1b-5p,ENSMUSG00000037225:mmu-miR-16-5p,ENSMUSG00000027164:mmu-miR-144-3p,ENSMUSG00000006699:mmu-miR-1a-3p,ENSMUSG00000005533:mmu-miR-1a-3p,ENSMUSG00000024401:mmu-miR-19a-3p,ENSMUSG00000049791:mmu-miR-19a-3…
Biological Process	GO:2000677	regulation of transcription regulatory region DNA binding	8	45	4.08536e-08	9.77977e-07	ENSMUSG00000003032:mmu-miR-1a-3p,ENSMUSG00000020053:mmu-miR-1a-3p,ENSMUSG00000038193:mmu-miR-1a-3p,ENSMUSG00000028086:mmu-miR-25-3p,ENSMUSG00000022528:mmu-miR-1a-3p,ENSMUSG00000009900:mmu-miR-16-5p,ENSMUSG00000040289:mmu-miR-451a,ENSMUSG00000027164:mmu-miR-144-3p
Biological Process	GO:0042692	muscle cell differentiation	27	698	4.99427e-08	1.18843e-06	ENSMUSG00000006678:mmu-miR-1a-3p,ENSMUSG00000057329:mmu-miR-16-5p,ENSMUSG00000004872:mmu-miR-1a-3p,ENSMUSG00000020053:mmu-miR-1a-3p,ENSMUSG00000017491:mmu-miR-1a-3p,ENSMUSG00000040289:mmu-miR-451a,ENSMUSG00000048482:mmu-miR-1a-3p,ENSMUSG00000030557:mmu-miR-1a-3p,ENSMUSG00000055204:mmu-miR-451a,ENSMUSG00000015605:mmu-miR-1a-3p,ENSMUSG00000021944:mmu-miR-1a-3p,ENSMUSG00000062908:mmu-miR-19a-3p,ENSM…
Biological Process	GO:0030879	mammary gland development	15	222	5.04466e-08	1.19682e-06	ENSMUSG00000005268:mmu-miR-1903,ENSMUSG00000004872:mmu-miR-1a-3p,ENSMUSG00000070348:mmu-miR-16-5p,ENSMUSG00000055980:mmu-miR-126a-3p,ENSMUSG00000037225:mmu-miR-16-5p,ENSMUSG00000023951:mmu-miR-16-5p,ENSMUSG00000023951:mmu-miR-126a-3p,ENSMUSG00000050953:mmu-miR-1a-3p,ENSMUSG00000020053:mmu-miR-1a-3p,ENSMUSG00000030201:mmu-miR-19a-3p,ENSMUSG00000033792:mmu-miR-1b-5p,ENSMUSG00000030302:mmu-let-7i-5p…
Biological Process	GO:0051726	regulation of cell cycle	48	1801	5.59527e-08	1.32349e-06	ENSMUSG00000032035:mmu-miR-1a-3p,ENSMUSG00000029816:mmu-miR-1903,ENSMUSG00000027104:mmu-miR-1b-5p,ENSMUSG00000027104:mmu-miR-451a,ENSMUSG00000022346:mmu-miR-451a,ENSMUSG00000061665:mmu-miR-142a-3p,ENSMUSG00000055116:mmu-miR-142a-3p,ENSMUSG00000030201:mmu-miR-19a-3p,ENSMUSG00000001855:mmu-let-7i-5p,ENSMUSG00000022892:mmu-miR-16-5p,ENSMUSG00000013663:mmu-miR-19a-3p,ENSMUSG00000013663:mmu-miR-19a-3p…
Biological Process	GO:0050890	cognition	21	445	6.09181e-08	1.43665e-06	ENSMUSG00000034957:mmu-miR-144-3p,ENSMUSG00000020053:mmu-miR-1a-3p,ENSMUSG00000027210:mmu-let-7i-5p,ENSMUSG00000029104:mmu-miR-1b-5p,ENSMUSG00000027273:mmu-miR-19a-3p,ENSMUSG00000052684:mmu-miR-16-5p,ENSMUSG00000022892:mmu-miR-16-5p,ENSMUSG00000013663:mmu-miR-19a-3p,ENSMUSG00000013663:mmu-miR-19a-3p,ENSMUSG00000013663:mmu-miR-144-3p,ENSMUSG00000062202:mmu-miR-1903,ENSMUSG00000046876:mmu-miR-19a-3…
Biological Process	GO:0010817	regulation of hormone levels	29	799	6.18902e-08	1.45525e-06	ENSMUSG00000073830:mmu-miR-1a-3p,ENSMUSG00000033685:mmu-miR-1a-3p,ENSMUSG00000005533:mmu-miR-1a-3p,ENSMUSG00000021109:mmu-miR-144-3p,ENSMUSG00000073834:mmu-miR-1a-3p,ENSMUSG00000073834:mmu-let-7i-5p,ENSMUSG00000027712:mmu-miR-1a-3p,ENSMUSG00000096688:mmu-miR-1a-3p,ENSMUSG00000096688:mmu-let-7i-5p,ENSMUSG00000049791:mmu-miR-19a-3p,ENSMUSG00000019838:mmu-miR-1b-5p,ENSMUSG00000024401:mmu-miR-19a-3p,…
Biological Process	GO:0055082	cellular chemical homeostasis	39	1309	6.52334e-08	1.52932e-06	ENSMUSG00000066551:mmu-miR-142a-3p,ENSMUSG00000073830:mmu-miR-1a-3p,ENSMUSG00000000902:mmu-miR-1a-3p,ENSMUSG00000027716:mmu-miR-451a,ENSMUSG00000078680:mmu-miR-1a-3p,ENSMUSG00000030525:mmu-miR-19a-3p,ENSMUSG00000026434:mmu-miR-451a,ENSMUSG00000027665:mmu-miR-1b-5p,ENSMUSG00000030557:mmu-miR-1a-3p,ENSMUSG00000001175:mmu-miR-1a-3p,ENSMUSG00000094793:mmu-miR-1a-3p,ENSMUSG00000039953:mmu-miR-451a,ENS…
Biological Process	GO:0070201	regulation of establishment of protein localization	47	1755	6.76251e-08	1.58071e-06	ENSMUSG00000027164:mmu-miR-144-3p,ENSMUSG00000006699:mmu-miR-1a-3p,ENSMUSG00000024384:mmu-miR-1b-5p,ENSMUSG00000073830:mmu-miR-1a-3p,ENSMUSG00000024401:mmu-miR-19a-3p,ENSMUSG00000027712:mmu-miR-1a-3p,ENSMUSG00000022967:mmu-let-7i-5p,ENSMUSG00000066551:mmu-miR-142a-3p,ENSMUSG00000054387:mmu-miR-16-5p,ENSMUSG00000009900:mmu-miR-16-5p,ENSMUSG00000037523:mmu-miR-1b-5p,ENSMUSG00000050395:mmu-miR-1903,…
Biological Process	GO:0071900	regulation of protein serine/threonine kinase activity	30	851	6.87415e-08	1.60208e-06	ENSMUSG00000050697:mmu-miR-144-3p,ENSMUSG00000050697:mmu-miR-451a,ENSMUSG00000026349:mmu-miR-16-5p,ENSMUSG00000020542:mmu-miR-1a-3p,ENSMUSG00000024401:mmu-miR-19a-3p,ENSMUSG00000049791:mmu-miR-19a-3p,ENSMUSG00000017652:mmu-miR-16-5p,ENSMUSG00000031392:mmu-miR-142a-3p,ENSMUSG00000039005:mmu-miR-1b-5p,ENSMUSG00000005533:mmu-miR-1a-3p,ENSMUSG00000027164:mmu-miR-144-3p,ENSMUSG00000070348:mmu-miR-16-5…
Biological Process	GO:0090087	regulation of peptide transport	46	1700	7.00165e-08	1.62701e-06	ENSMUSG00000055980:mmu-miR-126a-3p,ENSMUSG00000031555:mmu-miR-126a-3p,ENSMUSG00000027273:mmu-miR-19a-3p,ENSMUSG00000003452:mmu-miR-16-5p,ENSMUSG00000025746:mmu-let-7i-5p,ENSMUSG00000025746:mmu-miR-142a-3p,ENSMUSG00000061665:mmu-miR-142a-3p,ENSMUSG00000055116:mmu-miR-142a-3p,ENSMUSG00000078673:mmu-miR-1a-3p,ENSMUSG00000034908:mmu-miR-451a,ENSMUSG00000026193:mmu-miR-1a-3p,ENSMUSG00000026193:mmu-miR…
Biological Process	GO:0070482	response to oxygen levels	28	761	7.94298e-08	1.84036e-06	ENSMUSG00000048482:mmu-miR-1a-3p,ENSMUSG00000015605:mmu-miR-1a-3p,ENSMUSG00000020364:mmu-miR-1b-5p,ENSMUSG00000013663:mmu-miR-19a-3p,ENSMUSG00000013663:mmu-miR-19a-3p,ENSMUSG00000013663:mmu-miR-144-3p,ENSMUSG00000027490:mmu-miR-1b-5p,ENSMUSG00000027715:mmu-miR-1b-5p,ENSMUSG00000003452:mmu-miR-16-5p,ENSMUSG00000057329:mmu-miR-16-5p,ENSMUSG00000015709:mmu-miR-451a,ENSMUSG00000032035:mmu-miR-1a-3p,E…
Biological Process	GO:0051962	positive regulation of nervous system development	33	1010	8.81685e-08	2.03687e-06	ENSMUSG00000021109:mmu-miR-144-3p,ENSMUSG00000022528:mmu-miR-1a-3p,ENSMUSG00000005533:mmu-miR-1a-3p,ENSMUSG00000041120:mmu-miR-1903,ENSMUSG00000037225:mmu-miR-16-5p,ENSMUSG00000026193:mmu-miR-1a-3p,ENSMUSG00000026193:mmu-miR-140-3p,ENSMUSG00000033307:mmu-miR-451a,ENSMUSG00000025586:mmu-miR-1a-3p,ENSMUSG00000025586:mmu-miR-25-3p,ENSMUSG00000023951:mmu-miR-16-5p,ENSMUSG00000023951:mmu-miR-126a-3p,E…
Biological Process	GO:0045165	cell fate commitment	18	339	9.48776e-08	2.1855e-06	ENSMUSG00000006699:mmu-miR-1a-3p,ENSMUSG00000028717:mmu-miR-126a-3p,ENSMUSG00000022528:mmu-miR-1a-3p,ENSMUSG00000009900:mmu-miR-16-5p,ENSMUSG00000048251:mmu-miR-16-5p,ENSMUSG00000038331:mmu-miR-1b-5p,ENSMUSG00000024563:mmu-miR-140-3p,ENSMUSG00000037225:mmu-miR-16-5p,ENSMUSG00000028736:mmu-miR-1a-3p,ENSMUSG00000023333:mmu-miR-1903,ENSMUSG00000021944:mmu-miR-1a-3p,ENSMUSG00000022952:mmu-miR-126a-3p…
Biological Process	GO:0051338	regulation of transferase activity	46	1720	9.81752e-08	2.2549e-06	ENSMUSG00000039005:mmu-miR-1b-5p,ENSMUSG00000005533:mmu-miR-1a-3p,ENSMUSG00000017652:mmu-miR-16-5p,ENSMUSG00000049791:mmu-miR-19a-3p,ENSMUSG00000031834:mmu-miR-126a-3p,ENSMUSG00000020542:mmu-miR-1a-3p,ENSMUSG00000033307:mmu-miR-451a,ENSMUSG00000023951:mmu-miR-16-5p,ENSMUSG00000023951:mmu-miR-126a-3p,ENSMUSG00000037225:mmu-miR-16-5p,ENSMUSG00000023050:mmu-miR-19a-3p,ENSMUSG00000013663:mmu-miR-19a-…
Biological Process	GO:0007411	axon guidance	17	303	9.8491e-08	2.25561e-06	ENSMUSG00000030084:mmu-miR-1b-5p,ENSMUSG00000022892:mmu-miR-16-5p,ENSMUSG00000020315:mmu-miR-144-3p,ENSMUSG00000027852:mmu-miR-1b-5p,ENSMUSG00000019647:mmu-miR-142a-3p,ENSMUSG00000005958:mmu-miR-1b-5p,ENSMUSG00000060534:mmu-miR-1903,ENSMUSG00000048482:mmu-miR-1a-3p,ENSMUSG00000023951:mmu-miR-16-5p,ENSMUSG00000023951:mmu-miR-126a-3p,ENSMUSG00000051650:mmu-miR-1b-5p,ENSMUSG00000048251:mmu-miR-16-5p…
Biological Process	GO:0021953	central nervous system neuron differentiation	16	268	1.0077e-07	2.29455e-06	ENSMUSG00000038331:mmu-miR-1b-5p,ENSMUSG00000048251:mmu-miR-16-5p,ENSMUSG00000028736:mmu-miR-1a-3p,ENSMUSG00000028717:mmu-miR-126a-3p,ENSMUSG00000020423:mmu-miR-25-3p,ENSMUSG00000033792:mmu-miR-1b-5p,ENSMUSG00000063626:mmu-miR-1903,ENSMUSG00000022528:mmu-miR-1a-3p,ENSMUSG00000009900:mmu-miR-16-5p,ENSMUSG00000030302:mmu-let-7i-5p,ENSMUSG00000035764:mmu-miR-1b-5p,ENSMUSG00000004872:mmu-miR-1a-3p,EN…
Biological Process	GO:0046483	heterocycle metabolic process	177	11069	1.0061e-07	2.29455e-06	ENSMUSG00000070780:mmu-miR-1b-5p,ENSMUSG00000055204:mmu-miR-451a,ENSMUSG00000022952:mmu-miR-126a-3p,ENSMUSG00000003282:mmu-miR-1b-5p,ENSMUSG00000021549:mmu-miR-1a-3p,ENSMUSG00000038766:mmu-miR-1b-5p,ENSMUSG00000052684:mmu-miR-16-5p,ENSMUSG00000026012:mmu-miR-1b-5p,ENSMUSG00000028890:mmu-miR-1b-5p,ENSMUSG00000003032:mmu-miR-1a-3p,ENSMUSG00000026618:mmu-miR-1b-5p,ENSMUSG00000041075:mmu-miR-1a-3p,EN…
Biological Process	GO:0007611	learning or memory	19	379	1.02582e-07	2.3291e-06	ENSMUSG00000020053:mmu-miR-1a-3p,ENSMUSG00000034957:mmu-miR-144-3p,ENSMUSG00000027273:mmu-miR-19a-3p,ENSMUSG00000052684:mmu-miR-16-5p,ENSMUSG00000027210:mmu-let-7i-5p,ENSMUSG00000029104:mmu-miR-1b-5p,ENSMUSG00000013663:mmu-miR-19a-3p,ENSMUSG00000013663:mmu-miR-19a-3p,ENSMUSG00000013663:mmu-miR-144-3p,ENSMUSG00000022892:mmu-miR-16-5p,ENSMUSG00000015605:mmu-miR-1a-3p,ENSMUSG00000048482:mmu-miR-1a-3…
Biological Process	GO:0097485	neuron projection guidance	17	304	1.03247e-07	2.33751e-06	ENSMUSG00000051650:mmu-miR-1b-5p,ENSMUSG00000023951:mmu-miR-16-5p,ENSMUSG00000023951:mmu-miR-126a-3p,ENSMUSG00000048251:mmu-miR-16-5p,ENSMUSG00000049336:mmu-miR-451a,ENSMUSG00000030223:mmu-miR-1903,ENSMUSG00000020099:mmu-miR-1b-5p,ENSMUSG00000059921:mmu-miR-144-3p,ENSMUSG00000009900:mmu-miR-16-5p,ENSMUSG00000063626:mmu-miR-1903,ENSMUSG00000030084:mmu-miR-1b-5p,ENSMUSG00000022892:mmu-miR-16-5p,ENS…
Biological Process	GO:0035265	organ growth	15	235	1.06412e-07	2.40231e-06	ENSMUSG00000021944:mmu-miR-1a-3p,ENSMUSG00000020542:mmu-miR-1a-3p,ENSMUSG00000003282:mmu-miR-1b-5p,ENSMUSG00000017491:mmu-miR-1a-3p,ENSMUSG00000020838:mmu-miR-16-5p,ENSMUSG00000013663:mmu-miR-19a-3p,ENSMUSG00000013663:mmu-miR-19a-3p,ENSMUSG00000013663:mmu-miR-144-3p,ENSMUSG00000041616:mmu-miR-1a-3p,ENSMUSG00000022306:mmu-miR-19a-3p,ENSMUSG00000024563:mmu-miR-140-3p,ENSMUSG00000037225:mmu-miR-16-5…
Molecular Function	GO:0003682	chromatin binding	31	918	1.0708e-07	2.41053e-06	ENSMUSG00000027104:mmu-miR-1b-5p,ENSMUSG00000027104:mmu-miR-451a,ENSMUSG00000061665:mmu-miR-142a-3p,ENSMUSG00000006678:mmu-miR-1a-3p,ENSMUSG00000078619:mmu-miR-1a-3p,ENSMUSG00000004099:mmu-miR-126a-3p,ENSMUSG00000052684:mmu-miR-16-5p,ENSMUSG00000034673:mmu-miR-1903,ENSMUSG00000004872:mmu-miR-1a-3p,ENSMUSG00000014074:mmu-miR-16-5p,ENSMUSG00000022952:mmu-miR-126a-3p,ENSMUSG00000046876:mmu-miR-19a-3…
Biological Process	GO:0045664	regulation of neuron differentiation	36	1175	1.0931e-07	2.45375e-06	ENSMUSG00000026193:mmu-miR-1a-3p,ENSMUSG00000026193:mmu-miR-140-3p,ENSMUSG00000023951:mmu-miR-16-5p,ENSMUSG00000023951:mmu-miR-126a-3p,ENSMUSG00000025586:mmu-miR-1a-3p,ENSMUSG00000025586:mmu-miR-25-3p,ENSMUSG00000033307:mmu-miR-451a,ENSMUSG00000022528:mmu-miR-1a-3p,ENSMUSG00000041120:mmu-miR-1903,ENSMUSG00000020838:mmu-miR-16-5p,ENSMUSG00000005533:mmu-miR-1a-3p,ENSMUSG00000027273:mmu-miR-19a-3p,E…
Biological Process	GO:0007389	pattern specification process	24	590	1.12236e-07	2.51231e-06	ENSMUSG00000030201:mmu-miR-19a-3p,ENSMUSG00000021944:mmu-miR-1a-3p,ENSMUSG00000015605:mmu-miR-1a-3p,ENSMUSG00000040289:mmu-miR-451a,ENSMUSG00000036144:mmu-miR-1a-3p,ENSMUSG00000038227:mmu-miR-126a-3p,ENSMUSG00000029104:mmu-miR-1b-5p,ENSMUSG00000004872:mmu-miR-1a-3p,ENSMUSG00000052155:mmu-miR-1b-5p,ENSMUSG00000020135:mmu-let-7i-5p,ENSMUSG00000034673:mmu-miR-1903,ENSMUSG00000038193:mmu-miR-1a-3p,EN…
Biological Process	GO:0060548	negative regulation of cell death	56	2321	1.1318e-07	2.52631e-06	ENSMUSG00000028495:mmu-miR-1a-3p,ENSMUSG00000026029:mmu-miR-1b-5p,ENSMUSG00000020099:mmu-miR-1b-5p,ENSMUSG00000048251:mmu-miR-16-5p,ENSMUSG00000024401:mmu-miR-19a-3p,ENSMUSG00000054387:mmu-miR-16-5p,ENSMUSG00000050697:mmu-miR-144-3p,ENSMUSG00000050697:mmu-miR-451a,ENSMUSG00000020423:mmu-miR-25-3p,ENSMUSG00000090877:mmu-miR-1a-3p,ENSMUSG00000057329:mmu-miR-16-5p,ENSMUSG00000029104:mmu-miR-1b-5p,EN…
Biological Process	GO:0061564	axon development	29	824	1.18355e-07	2.6344e-06	ENSMUSG00000033307:mmu-miR-451a,ENSMUSG00000022762:mmu-miR-25-3p,ENSMUSG00000023951:mmu-miR-16-5p,ENSMUSG00000023951:mmu-miR-126a-3p,ENSMUSG00000051650:mmu-miR-1b-5p,ENSMUSG00000030223:mmu-miR-1903,ENSMUSG00000049336:mmu-miR-451a,ENSMUSG00000048251:mmu-miR-16-5p,ENSMUSG00000026193:mmu-miR-1a-3p,ENSMUSG00000026193:mmu-miR-140-3p,ENSMUSG00000020099:mmu-miR-1b-5p,ENSMUSG00000005533:mmu-miR-1a-3p,ENS…
Biological Process	GO:0002376	immune system process	91	4616	1.18821e-07	2.63737e-06	ENSMUSG00000025867:mmu-miR-1903,ENSMUSG00000032178:mmu-miR-19a-3p,ENSMUSG00000020053:mmu-miR-1a-3p,ENSMUSG00000027087:mmu-miR-16-5p,ENSMUSG00000034957:mmu-miR-144-3p,ENSMUSG00000052155:mmu-miR-1b-5p,ENSMUSG00000057329:mmu-miR-16-5p,ENSMUSG00000032413:mmu-miR-1b-5p,ENSMUSG00000027951:mmu-miR-1a-3p,ENSMUSG00000040943:mmu-miR-19a-3p,ENSMUSG00000005958:mmu-miR-1b-5p,ENSMUSG00000038145:mmu-miR-451a,EN…
Biological Process	GO:0006725	cellular aromatic compound metabolic process	178	11176	1.204e-07	2.66495e-06	ENSMUSG00000070348:mmu-miR-16-5p,ENSMUSG00000037523:mmu-miR-1b-5p,ENSMUSG00000038331:mmu-miR-1b-5p,ENSMUSG00000060206:mmu-miR-1b-5p,ENSMUSG00000032113:mmu-miR-1b-5p,ENSMUSG00000073830:mmu-miR-1a-3p,ENSMUSG00000024384:mmu-miR-1b-5p,ENSMUSG00000006699:mmu-miR-1a-3p,ENSMUSG00000003032:mmu-miR-1a-3p,ENSMUSG00000026012:mmu-miR-1b-5p,ENSMUSG00000028890:mmu-miR-1b-5p,ENSMUSG00000052684:mmu-miR-16-5p,ENS…
Biological Process	GO:0003300	cardiac muscle hypertrophy	11	118	1.23226e-07	2.70483e-06	ENSMUSG00000027716:mmu-miR-451a,ENSMUSG00000040752:mmu-miR-1a-3p,ENSMUSG00000038193:mmu-miR-1a-3p,ENSMUSG00000020053:mmu-miR-1a-3p,ENSMUSG00000020542:mmu-miR-1a-3p,ENSMUSG00000021756:mmu-miR-142a-3p,ENSMUSG00000021944:mmu-miR-1a-3p,ENSMUSG00000009555:mmu-miR-1a-3p,ENSMUSG00000030557:mmu-miR-1a-3p,ENSMUSG00000028967:mmu-miR-126a-3p,ENSMUSG00000041616:mmu-miR-1a-3p
Biological Process	GO:0050678	regulation of epithelial cell proliferation	24	593	1.23156e-07	2.70483e-06	ENSMUSG00000013663:mmu-miR-19a-3p,ENSMUSG00000013663:mmu-miR-19a-3p,ENSMUSG00000013663:mmu-miR-144-3p,ENSMUSG00000028967:mmu-miR-126a-3p,ENSMUSG00000040289:mmu-miR-451a,ENSMUSG00000030201:mmu-miR-19a-3p,ENSMUSG00000020053:mmu-miR-1a-3p,ENSMUSG00000041075:mmu-miR-1a-3p,ENSMUSG00000041075:mmu-miR-126a-3p,ENSMUSG00000021256:mmu-miR-1903,ENSMUSG00000027104:mmu-miR-1b-5p,ENSMUSG00000027104:mmu-miR-451…
Biological Process	GO:0060341	regulation of cellular localization	43	1563	1.23158e-07	2.70483e-06	ENSMUSG00000031834:mmu-miR-126a-3p,ENSMUSG00000096688:mmu-miR-1a-3p,ENSMUSG00000096688:mmu-let-7i-5p,ENSMUSG00000073834:mmu-miR-1a-3p,ENSMUSG00000073834:mmu-let-7i-5p,ENSMUSG00000021109:mmu-miR-144-3p,ENSMUSG00000022528:mmu-miR-1a-3p,ENSMUSG00000090935:mmu-miR-1903,ENSMUSG00000039005:mmu-miR-1b-5p,ENSMUSG00000033685:mmu-miR-1a-3p,ENSMUSG00000025266:mmu-let-7i-5p,ENSMUSG00000023951:mmu-miR-16-5p,E…
Biological Process	GO:0008015	blood circulation	25	639	1.2737e-07	2.78806e-06	ENSMUSG00000036438:mmu-miR-1a-3p,ENSMUSG00000022505:mmu-miR-1903,ENSMUSG00000052821:mmu-miR-1b-5p,ENSMUSG00000001175:mmu-miR-1a-3p,ENSMUSG00000030557:mmu-miR-1a-3p,ENSMUSG00000021944:mmu-miR-1a-3p,ENSMUSG00000033307:mmu-miR-451a,ENSMUSG00000059895:mmu-miR-144-3p,ENSMUSG00000023951:mmu-miR-16-5p,ENSMUSG00000023951:mmu-miR-126a-3p,ENSMUSG00000030223:mmu-miR-1903,ENSMUSG00000068457:mmu-miR-1b-5p,ENS…
Biological Process	GO:0071495	cellular response to endogenous stimulus	53	2148	1.2806e-07	2.79545e-06	ENSMUSG00000020593:mmu-miR-1903,ENSMUSG00000022892:mmu-miR-16-5p,ENSMUSG00000021944:mmu-miR-1a-3p,ENSMUSG00000040289:mmu-miR-451a,ENSMUSG00000019699:mmu-miR-451a,ENSMUSG00000017491:mmu-miR-1a-3p,ENSMUSG00000033014:mmu-miR-451a,ENSMUSG00000055116:mmu-miR-142a-3p,ENSMUSG00000022346:mmu-miR-451a,ENSMUSG00000020532:mmu-miR-451a,ENSMUSG00000031555:mmu-miR-126a-3p,ENSMUSG00000055980:mmu-miR-126a-3p,ENS…
Biological Process	GO:0048661	positive regulation of smooth muscle cell proliferation	12	146	1.33115e-07	2.89782e-06	ENSMUSG00000027164:mmu-miR-144-3p,ENSMUSG00000005533:mmu-miR-1a-3p,ENSMUSG00000031392:mmu-miR-142a-3p,ENSMUSG00000026313:mmu-miR-1a-3p,ENSMUSG00000024401:mmu-miR-19a-3p,ENSMUSG00000021109:mmu-miR-144-3p,ENSMUSG00000023951:mmu-miR-16-5p,ENSMUSG00000023951:mmu-miR-126a-3p,ENSMUSG00000022346:mmu-miR-451a,ENSMUSG00000020053:mmu-miR-1a-3p,ENSMUSG00000025746:mmu-let-7i-5p,ENSMUSG00000025746:mmu-miR-142…
Biological Process	GO:0003013	circulatory system process	25	642	1.3909e-07	3.0196e-06	ENSMUSG00000030557:mmu-miR-1a-3p,ENSMUSG00000021944:mmu-miR-1a-3p,ENSMUSG00000001175:mmu-miR-1a-3p,ENSMUSG00000052821:mmu-miR-1b-5p,ENSMUSG00000022505:mmu-miR-1903,ENSMUSG00000036438:mmu-miR-1a-3p,ENSMUSG00000057123:mmu-miR-144-3p,ENSMUSG00000054387:mmu-miR-16-5p,ENSMUSG00000029661:mmu-let-7i-5p,ENSMUSG00000021109:mmu-miR-144-3p,ENSMUSG00000026313:mmu-miR-1a-3p,ENSMUSG00000090877:mmu-miR-1a-3p,EN…
Biological Process	GO:0014897	striated muscle hypertrophy	11	122	1.73493e-07	3.75617e-06	ENSMUSG00000020542:mmu-miR-1a-3p,ENSMUSG00000021756:mmu-miR-142a-3p,ENSMUSG00000021944:mmu-miR-1a-3p,ENSMUSG00000009555:mmu-miR-1a-3p,ENSMUSG00000030557:mmu-miR-1a-3p,ENSMUSG00000028967:mmu-miR-126a-3p,ENSMUSG00000041616:mmu-miR-1a-3p,ENSMUSG00000027716:mmu-miR-451a,ENSMUSG00000040752:mmu-miR-1a-3p,ENSMUSG00000038193:mmu-miR-1a-3p,ENSMUSG00000020053:mmu-miR-1a-3p
Biological Process	GO:0006112	energy reserve metabolic process	15	245	1.8272e-07	3.93444e-06	ENSMUSG00000055980:mmu-miR-126a-3p,ENSMUSG00000022346:mmu-miR-451a,ENSMUSG00000036438:mmu-miR-1a-3p,ENSMUSG00000078680:mmu-miR-1a-3p,ENSMUSG00000020053:mmu-miR-1a-3p,ENSMUSG00000021756:mmu-miR-142a-3p,ENSMUSG00000096688:mmu-miR-1a-3p,ENSMUSG00000096688:mmu-let-7i-5p,ENSMUSG00000094793:mmu-miR-1a-3p,ENSMUSG00000001175:mmu-miR-1a-3p,ENSMUSG00000078673:mmu-miR-1a-3p,ENSMUSG00000066551:mmu-miR-142a-3…
Biological Process	GO:0043500	muscle adaptation	15	245	1.8272e-07	3.93444e-06	ENSMUSG00000040752:mmu-miR-1a-3p,ENSMUSG00000031972:mmu-miR-1a-3p,ENSMUSG00000027716:mmu-miR-451a,ENSMUSG00000003032:mmu-miR-1a-3p,ENSMUSG00000006678:mmu-miR-1a-3p,ENSMUSG00000020053:mmu-miR-1a-3p,ENSMUSG00000038193:mmu-miR-1a-3p,ENSMUSG00000021944:mmu-miR-1a-3p,ENSMUSG00000009555:mmu-miR-1a-3p,ENSMUSG00000030557:mmu-miR-1a-3p,ENSMUSG00000021756:mmu-miR-142a-3p,ENSMUSG00000026313:mmu-miR-1a-3p,EN…
Biological Process	GO:0043502	regulation of muscle adaptation	11	123	1.88598e-07	4.05e-06	ENSMUSG00000028967:mmu-miR-126a-3p,ENSMUSG00000030557:mmu-miR-1a-3p,ENSMUSG00000009555:mmu-miR-1a-3p,ENSMUSG00000021756:mmu-miR-142a-3p,ENSMUSG00000022952:mmu-miR-126a-3p,ENSMUSG00000026313:mmu-miR-1a-3p,ENSMUSG00000020053:mmu-miR-1a-3p,ENSMUSG00000038193:mmu-miR-1a-3p,ENSMUSG00000040752:mmu-miR-1a-3p,ENSMUSG00000003032:mmu-miR-1a-3p,ENSMUSG00000027716:mmu-miR-451a
Biological Process	GO:0071407	cellular response to organic cyclic compound	34	1099	2.00085e-07	4.28506e-06	ENSMUSG00000003032:mmu-miR-1a-3p,ENSMUSG00000057329:mmu-miR-16-5p,ENSMUSG00000063804:mmu-miR-1b-5p,ENSMUSG00000027715:mmu-miR-1b-5p,ENSMUSG00000034957:mmu-miR-144-3p,ENSMUSG00000020053:mmu-miR-1a-3p,ENSMUSG00000094793:mmu-miR-1a-3p,ENSMUSG00000048482:mmu-miR-1a-3p,ENSMUSG00000027951:mmu-miR-1a-3p,ENSMUSG00000028967:mmu-miR-126a-3p,ENSMUSG00000026029:mmu-miR-1b-5p,ENSMUSG00000024563:mmu-miR-140-3p…
Biological Process	GO:0071496	cellular response to external stimulus	23	565	2.0415e-07	4.36035e-06	ENSMUSG00000002068:mmu-miR-16-5p,ENSMUSG00000094793:mmu-miR-1a-3p,ENSMUSG00000078673:mmu-miR-1a-3p,ENSMUSG00000015605:mmu-miR-1a-3p,ENSMUSG00000057329:mmu-miR-16-5p,ENSMUSG00000025746:mmu-let-7i-5p,ENSMUSG00000025746:mmu-miR-142a-3p,ENSMUSG00000052684:mmu-miR-16-5p,ENSMUSG00000026313:mmu-miR-1a-3p,ENSMUSG00000096688:mmu-miR-1a-3p,ENSMUSG00000096688:mmu-let-7i-5p,ENSMUSG00000020542:mmu-miR-1a-3p,E…
Biological Process	GO:0014896	muscle hypertrophy	11	124	2.04856e-07	4.36365e-06	ENSMUSG00000030557:mmu-miR-1a-3p,ENSMUSG00000009555:mmu-miR-1a-3p,ENSMUSG00000021944:mmu-miR-1a-3p,ENSMUSG00000021756:mmu-miR-142a-3p,ENSMUSG00000020542:mmu-miR-1a-3p,ENSMUSG00000041616:mmu-miR-1a-3p,ENSMUSG00000028967:mmu-miR-126a-3p,ENSMUSG00000040752:mmu-miR-1a-3p,ENSMUSG00000027716:mmu-miR-451a,ENSMUSG00000020053:mmu-miR-1a-3p,ENSMUSG00000038193:mmu-miR-1a-3p
Biological Process	GO:0043069	negative regulation of programmed cell death	53	2181	2.06389e-07	4.38453e-06	ENSMUSG00000020423:mmu-miR-25-3p,ENSMUSG00000090877:mmu-miR-1a-3p,ENSMUSG00000024401:mmu-miR-19a-3p,ENSMUSG00000054387:mmu-miR-16-5p,ENSMUSG00000050697:mmu-miR-144-3p,ENSMUSG00000050697:mmu-miR-451a,ENSMUSG00000048251:mmu-miR-16-5p,ENSMUSG00000028495:mmu-miR-1a-3p,ENSMUSG00000026029:mmu-miR-1b-5p,ENSMUSG00000020099:mmu-miR-1b-5p,ENSMUSG00000022285:mmu-miR-451a,ENSMUSG00000027951:mmu-miR-1a-3p,ENS…
Biological Process	GO:0071240	cellular response to food	6	24	2.44539e-07	5.18108e-06	ENSMUSG00000096688:mmu-miR-1a-3p,ENSMUSG00000096688:mmu-let-7i-5p,ENSMUSG00000094793:mmu-miR-1a-3p,ENSMUSG00000078673:mmu-miR-1a-3p,ENSMUSG00000073834:mmu-miR-1a-3p,ENSMUSG00000073834:mmu-let-7i-5p,ENSMUSG00000073830:mmu-miR-1a-3p,ENSMUSG00000078680:mmu-miR-1a-3p
Biological Process	GO:0001701	in utero embryonic development	28	805	2.48933e-07	5.24612e-06	ENSMUSG00000022306:mmu-miR-19a-3p,ENSMUSG00000032113:mmu-miR-1b-5p,ENSMUSG00000000902:mmu-miR-1a-3p,ENSMUSG00000057446:mmu-let-7i-5p,ENSMUSG00000033792:mmu-miR-1b-5p,ENSMUSG00000022528:mmu-miR-1a-3p,ENSMUSG00000009900:mmu-miR-16-5p,ENSMUSG00000021109:mmu-miR-144-3p,ENSMUSG00000023951:mmu-miR-16-5p,ENSMUSG00000023951:mmu-miR-126a-3p,ENSMUSG00000054611:mmu-miR-19a-3p,ENSMUSG00000050953:mmu-miR-1a-3…
Biological Process	GO:1901360	organic cyclic compound metabolic process	180	11447	2.48589e-07	5.24612e-06	ENSMUSG00000036438:mmu-miR-1a-3p,ENSMUSG00000002881:mmu-miR-1903,ENSMUSG00000032788:mmu-miR-1b-5p,ENSMUSG00000063804:mmu-miR-1b-5p,ENSMUSG00000027210:mmu-let-7i-5p,ENSMUSG00000041515:mmu-miR-451a,ENSMUSG00000017466:mmu-miR-19a-3p,ENSMUSG00000027490:mmu-miR-1b-5p,ENSMUSG00000060534:mmu-miR-1903,ENSMUSG00000030557:mmu-miR-1a-3p,ENSMUSG00000062202:mmu-miR-1903,ENSMUSG00000078680:mmu-miR-1a-3p,ENSMUS…
Molecular Function	GO:1990837	sequence-specific double-stranded DNA binding	35	1165	2.62351e-07	5.51425e-06	ENSMUSG00000020542:mmu-miR-1a-3p,ENSMUSG00000042292:mmu-miR-1a-3p,ENSMUSG00000028717:mmu-miR-126a-3p,ENSMUSG00000048540:mmu-miR-1903,ENSMUSG00000017491:mmu-miR-1a-3p,ENSMUSG00000021944:mmu-miR-1a-3p,ENSMUSG00000015605:mmu-miR-1a-3p,ENSMUSG00000040289:mmu-miR-451a,ENSMUSG00000036144:mmu-miR-1a-3p,ENSMUSG00000015709:mmu-miR-451a,ENSMUSG00000002111:mmu-miR-126a-3p,ENSMUSG00000027104:mmu-miR-1b-5p,EN…
Biological Process	GO:0045444	fat cell differentiation	16	288	2.67576e-07	5.60918e-06	ENSMUSG00000022306:mmu-miR-19a-3p,ENSMUSG00000022528:mmu-miR-1a-3p,ENSMUSG00000009900:mmu-miR-16-5p,ENSMUSG00000012428:mmu-miR-1903,ENSMUSG00000023951:mmu-miR-16-5p,ENSMUSG00000023951:mmu-miR-126a-3p,ENSMUSG00000070348:mmu-miR-16-5p,ENSMUSG00000020593:mmu-miR-1903,ENSMUSG00000027490:mmu-miR-1b-5p,ENSMUSG00000030201:mmu-miR-19a-3p,ENSMUSG00000034957:mmu-miR-144-3p,ENSMUSG00000027104:mmu-miR-1b-5p,…
Biological Process	GO:0071394	cellular response to testosterone stimulus	8	57	2.77831e-07	5.80879e-06	ENSMUSG00000005533:mmu-miR-1a-3p,ENSMUSG00000073830:mmu-miR-1a-3p,ENSMUSG00000078673:mmu-miR-1a-3p,ENSMUSG00000073834:mmu-miR-1a-3p,ENSMUSG00000073834:mmu-let-7i-5p,ENSMUSG00000096688:mmu-miR-1a-3p,ENSMUSG00000096688:mmu-let-7i-5p,ENSMUSG00000094793:mmu-miR-1a-3p,ENSMUSG00000078680:mmu-miR-1a-3p,ENSMUSG00000022346:mmu-miR-451a
Biological Process	GO:0016055	Wnt signaling pathway	25	667	2.83485e-07	5.91141e-06	ENSMUSG00000021944:mmu-miR-1a-3p,ENSMUSG00000030201:mmu-miR-19a-3p,ENSMUSG00000001175:mmu-miR-1a-3p,ENSMUSG00000002068:mmu-miR-16-5p,ENSMUSG00000025860:mmu-miR-451a,ENSMUSG00000013663:mmu-miR-19a-3p,ENSMUSG00000013663:mmu-miR-19a-3p,ENSMUSG00000013663:mmu-miR-144-3p,ENSMUSG00000047888:mmu-miR-1b-5p,ENSMUSG00000020135:mmu-let-7i-5p,ENSMUSG00000003032:mmu-miR-1a-3p,ENSMUSG00000055116:mmu-miR-142a-3…
Biological Process	GO:0198738	cell-cell signaling by wnt	25	668	2.91449e-07	6.06152e-06	ENSMUSG00000068457:mmu-miR-1b-5p,ENSMUSG00000030223:mmu-miR-1903,ENSMUSG00000073563:mmu-miR-1b-5p,ENSMUSG00000070348:mmu-miR-16-5p,ENSMUSG00000040752:mmu-miR-1a-3p,ENSMUSG00000037225:mmu-miR-16-5p,ENSMUSG00000006699:mmu-miR-1a-3p,ENSMUSG00000028517:mmu-miR-16-5p,ENSMUSG00000049791:mmu-miR-19a-3p,ENSMUSG00000070867:mmu-miR-1903,ENSMUSG00000009900:mmu-miR-16-5p,ENSMUSG00000050697:mmu-miR-144-3p,ENS…
Biological Process	GO:0044262	cellular carbohydrate metabolic process	22	533	2.97902e-07	6.17951e-06	ENSMUSG00000078680:mmu-miR-1a-3p,ENSMUSG00000051650:mmu-miR-1b-5p,ENSMUSG00000037251:mmu-miR-16-5p,ENSMUSG00000073830:mmu-miR-1a-3p,ENSMUSG00000073834:mmu-miR-1a-3p,ENSMUSG00000073834:mmu-let-7i-5p,ENSMUSG00000066551:mmu-miR-142a-3p,ENSMUSG00000033540:mmu-miR-16-5p,ENSMUSG00000021109:mmu-miR-144-3p,ENSMUSG00000050697:mmu-miR-144-3p,ENSMUSG00000050697:mmu-miR-451a,ENSMUSG00000026313:mmu-miR-1a-3p,…
Biological Process	GO:0098602	single organism cell adhesion	34	1121	3.15275e-07	6.52281e-06	ENSMUSG00000005958:mmu-miR-1b-5p,ENSMUSG00000009073:mmu-let-7i-5p,ENSMUSG00000026012:mmu-miR-1b-5p,ENSMUSG00000057329:mmu-miR-16-5p,ENSMUSG00000003032:mmu-miR-1a-3p,ENSMUSG00000020053:mmu-miR-1a-3p,ENSMUSG00000041075:mmu-miR-1a-3p,ENSMUSG00000041075:mmu-miR-126a-3p,ENSMUSG00000027087:mmu-miR-16-5p,ENSMUSG00000066551:mmu-miR-142a-3p,ENSMUSG00000036099:mmu-miR-451a,ENSMUSG00000009900:mmu-miR-16-5p,…
Cellular Component	GO:0098589	membrane region	27	766	3.16305e-07	6.52709e-06	ENSMUSG00000025980:mmu-miR-1a-3p,ENSMUSG00000020838:mmu-miR-16-5p,ENSMUSG00000039005:mmu-miR-1b-5p,ENSMUSG00000005533:mmu-miR-1a-3p,ENSMUSG00000030302:mmu-let-7i-5p,ENSMUSG00000031483:mmu-miR-16-5p,ENSMUSG00000033792:mmu-miR-1b-5p,ENSMUSG00000024401:mmu-miR-19a-3p,ENSMUSG00000050953:mmu-miR-1a-3p,ENSMUSG00000030525:mmu-miR-19a-3p,ENSMUSG00000030162:mmu-miR-142a-3p,ENSMUSG00000020099:mmu-miR-1b-5p…
Molecular Function	GO:0000976	transcription regulatory region sequence-specific DNA binding	34	1124	3.35086e-07	6.89668e-06	ENSMUSG00000038331:mmu-miR-1b-5p,ENSMUSG00000068457:mmu-miR-1b-5p,ENSMUSG00000048251:mmu-miR-16-5p,ENSMUSG00000023333:mmu-miR-1903,ENSMUSG00000024563:mmu-miR-140-3p,ENSMUSG00000056493:mmu-miR-1b-5p,ENSMUSG00000000902:mmu-miR-1a-3p,ENSMUSG00000009555:mmu-miR-1a-3p,ENSMUSG00000034957:mmu-miR-144-3p,ENSMUSG00000028890:mmu-miR-1b-5p,ENSMUSG00000078619:mmu-miR-1a-3p,ENSMUSG00000027210:mmu-let-7i-5p,EN…
Biological Process	GO:0044260	cellular macromolecule metabolic process	238	16369	3.36227e-07	6.90224e-06	ENSMUSG00000025081:mmu-miR-1b-5p,ENSMUSG00000034957:mmu-miR-144-3p,ENSMUSG00000027087:mmu-miR-16-5p,ENSMUSG00000027715:mmu-miR-1b-5p,ENSMUSG00000026932:mmu-miR-1b-5p,ENSMUSG00000078619:mmu-miR-1a-3p,ENSMUSG00000006678:mmu-miR-1a-3p,ENSMUSG00000029104:mmu-miR-1b-5p,ENSMUSG00000028271:mmu-miR-1a-3p,ENSMUSG00000033658:mmu-miR-16-5p,ENSMUSG00000033658:mmu-miR-451a,ENSMUSG00000038145:mmu-miR-451a,ENSM…
Biological Process	GO:0032868	response to insulin	20	451	3.38202e-07	6.92484e-06	ENSMUSG00000026434:mmu-miR-451a,ENSMUSG00000033307:mmu-miR-451a,ENSMUSG00000025586:mmu-miR-1a-3p,ENSMUSG00000025586:mmu-miR-25-3p,ENSMUSG00000066551:mmu-miR-142a-3p,ENSMUSG00000050697:mmu-miR-144-3p,ENSMUSG00000050697:mmu-miR-451a,ENSMUSG00000021109:mmu-miR-144-3p,ENSMUSG00000031834:mmu-miR-126a-3p,ENSMUSG00000041616:mmu-miR-1a-3p,ENSMUSG00000039005:mmu-miR-1b-5p,ENSMUSG00000005533:mmu-miR-1a-3p,…
Biological Process	GO:0006139	nucleobase-containing compound metabolic process	172	10849	3.39214e-07	6.92765e-06	ENSMUSG00000030201:mmu-miR-19a-3p,ENSMUSG00000068327:mmu-miR-1a-3p,ENSMUSG00000015605:mmu-miR-1a-3p,ENSMUSG00000036144:mmu-miR-1a-3p,ENSMUSG00000047888:mmu-miR-1b-5p,ENSMUSG00000038193:mmu-miR-1a-3p,ENSMUSG00000055116:mmu-miR-142a-3p,ENSMUSG00000096688:mmu-miR-1a-3p,ENSMUSG00000096688:mmu-let-7i-5p,ENSMUSG00000060314:mmu-miR-1b-5p,ENSMUSG00000026313:mmu-miR-1a-3p,ENSMUSG00000023951:mmu-miR-16-5p,…
Biological Process	GO:0045844	positive regulation of striated muscle tissue development	10	104	3.45882e-07	7.0276e-06	ENSMUSG00000022306:mmu-miR-19a-3p,ENSMUSG00000050697:mmu-miR-144-3p,ENSMUSG00000050697:mmu-miR-451a,ENSMUSG00000009900:mmu-miR-16-5p,ENSMUSG00000021944:mmu-miR-1a-3p,ENSMUSG00000020542:mmu-miR-1a-3p,ENSMUSG00000050953:mmu-miR-1a-3p,ENSMUSG00000055116:mmu-miR-142a-3p,ENSMUSG00000020053:mmu-miR-1a-3p,ENSMUSG00000037225:mmu-miR-16-5p,ENSMUSG00000057329:mmu-miR-16-5p
Biological Process	GO:0048636	positive regulation of muscle organ development	10	104	3.45882e-07	7.0276e-06	ENSMUSG00000020542:mmu-miR-1a-3p,ENSMUSG00000050697:mmu-miR-144-3p,ENSMUSG00000050697:mmu-miR-451a,ENSMUSG00000021944:mmu-miR-1a-3p,ENSMUSG00000009900:mmu-miR-16-5p,ENSMUSG00000022306:mmu-miR-19a-3p,ENSMUSG00000057329:mmu-miR-16-5p,ENSMUSG00000037225:mmu-miR-16-5p,ENSMUSG00000050953:mmu-miR-1a-3p,ENSMUSG00000055116:mmu-miR-142a-3p,ENSMUSG00000020053:mmu-miR-1a-3p
Biological Process	GO:0009059	macromolecule biosynthetic process	174	11014	3.48447e-07	7.06161e-06	ENSMUSG00000000902:mmu-miR-1a-3p,ENSMUSG00000090877:mmu-miR-1a-3p,ENSMUSG00000031392:mmu-miR-142a-3p,ENSMUSG00000034563:mmu-miR-1b-5p,ENSMUSG00000031737:mmu-miR-1a-3p,ENSMUSG00000020423:mmu-miR-25-3p,ENSMUSG00000027164:mmu-miR-144-3p,ENSMUSG00000050697:mmu-miR-144-3p,ENSMUSG00000050697:mmu-miR-451a,ENSMUSG00000026380:mmu-miR-1b-5p,ENSMUSG00000026349:mmu-miR-16-5p,ENSMUSG00000022967:mmu-let-7i-5p,…
Biological Process	GO:0043066	negative regulation of apoptotic process	52	2160	3.62092e-07	7.31943e-06	ENSMUSG00000038193:mmu-miR-1a-3p,ENSMUSG00000022346:mmu-miR-451a,ENSMUSG00000025746:mmu-let-7i-5p,ENSMUSG00000025746:mmu-miR-142a-3p,ENSMUSG00000015709:mmu-miR-451a,ENSMUSG00000022505:mmu-miR-1903,ENSMUSG00000013663:mmu-miR-19a-3p,ENSMUSG00000013663:mmu-miR-19a-3p,ENSMUSG00000013663:mmu-miR-144-3p,ENSMUSG00000025860:mmu-miR-451a,ENSMUSG00000045515:mmu-miR-140-3p,ENSMUSG00000030201:mmu-miR-19a-3p,…
Biological Process	GO:1901652	response to peptide	29	870	3.63396e-07	7.32709e-06	ENSMUSG00000028967:mmu-miR-126a-3p,ENSMUSG00000020593:mmu-miR-1903,ENSMUSG00000019699:mmu-miR-451a,ENSMUSG00000030201:mmu-miR-19a-3p,ENSMUSG00000021549:mmu-miR-1a-3p,ENSMUSG00000020053:mmu-miR-1a-3p,ENSMUSG00000022346:mmu-miR-451a,ENSMUSG00000055980:mmu-miR-126a-3p,ENSMUSG00000027715:mmu-miR-1b-5p,ENSMUSG00000027276:mmu-miR-16-5p,ENSMUSG00000057329:mmu-miR-16-5p,ENSMUSG00000025746:mmu-let-7i-5p,E…
Biological Process	GO:0032845	negative regulation of homeostatic process	18	372	3.73534e-07	7.49338e-06	ENSMUSG00000001175:mmu-miR-1a-3p,ENSMUSG00000094793:mmu-miR-1a-3p,ENSMUSG00000078673:mmu-miR-1a-3p,ENSMUSG00000030557:mmu-miR-1a-3p,ENSMUSG00000027087:mmu-miR-16-5p,ENSMUSG00000036438:mmu-miR-1a-3p,ENSMUSG00000029104:mmu-miR-1b-5p,ENSMUSG00000057329:mmu-miR-16-5p,ENSMUSG00000025746:mmu-let-7i-5p,ENSMUSG00000025746:mmu-miR-142a-3p,ENSMUSG00000033685:mmu-miR-1a-3p,ENSMUSG00000073830:mmu-miR-1a-3p,E…
Biological Process	GO:1901655	cellular response to ketone	15	259	3.72709e-07	7.49338e-06	ENSMUSG00000078680:mmu-miR-1a-3p,ENSMUSG00000020532:mmu-miR-451a,ENSMUSG00000023951:mmu-miR-16-5p,ENSMUSG00000023951:mmu-miR-126a-3p,ENSMUSG00000022346:mmu-miR-451a,ENSMUSG00000003032:mmu-miR-1a-3p,ENSMUSG00000025746:mmu-let-7i-5p,ENSMUSG00000025746:mmu-miR-142a-3p,ENSMUSG00000026193:mmu-miR-1a-3p,ENSMUSG00000026193:mmu-miR-140-3p,ENSMUSG00000028967:mmu-miR-126a-3p,ENSMUSG00000073830:mmu-miR-1a-3…
Biological Process	GO:1901863	positive regulation of muscle tissue development	10	105	3.78433e-07	7.57249e-06	ENSMUSG00000057329:mmu-miR-16-5p,ENSMUSG00000037225:mmu-miR-16-5p,ENSMUSG00000020053:mmu-miR-1a-3p,ENSMUSG00000055116:mmu-miR-142a-3p,ENSMUSG00000050953:mmu-miR-1a-3p,ENSMUSG00000020542:mmu-miR-1a-3p,ENSMUSG00000050697:mmu-miR-144-3p,ENSMUSG00000050697:mmu-miR-451a,ENSMUSG00000021944:mmu-miR-1a-3p,ENSMUSG00000009900:mmu-miR-16-5p,ENSMUSG00000022306:mmu-miR-19a-3p
Biological Process	GO:0045669	positive regulation of osteoblast differentiation	9	81	3.88408e-07	7.75251e-06	ENSMUSG00000050953:mmu-miR-1a-3p,ENSMUSG00000020053:mmu-miR-1a-3p,ENSMUSG00000023951:mmu-miR-16-5p,ENSMUSG00000023951:mmu-miR-126a-3p,ENSMUSG00000034957:mmu-miR-144-3p,ENSMUSG00000052155:mmu-miR-1b-5p,ENSMUSG00000037225:mmu-miR-16-5p,ENSMUSG00000027276:mmu-miR-16-5p,ENSMUSG00000040289:mmu-miR-451a,ENSMUSG00000021756:mmu-miR-142a-3p
Biological Process	GO:0001655	urogenital system development	24	632	3.89387e-07	7.75252e-06	ENSMUSG00000027276:mmu-miR-16-5p,ENSMUSG00000057329:mmu-miR-16-5p,ENSMUSG00000006678:mmu-miR-1a-3p,ENSMUSG00000022346:mmu-miR-451a,ENSMUSG00000020053:mmu-miR-1a-3p,ENSMUSG00000045515:mmu-miR-140-3p,ENSMUSG00000017491:mmu-miR-1a-3p,ENSMUSG00000003282:mmu-miR-1b-5p,ENSMUSG00000040289:mmu-miR-451a,ENSMUSG00000048482:mmu-miR-1a-3p,ENSMUSG00000040943:mmu-miR-19a-3p,ENSMUSG00000005958:mmu-miR-1b-5p,ENS…
Molecular Function	GO:0000977	RNA polymerase II regulatory region sequence-specific DNA binding	30	925	4.03941e-07	8.02212e-06	ENSMUSG00000056493:mmu-miR-1b-5p,ENSMUSG00000000902:mmu-miR-1a-3p,ENSMUSG00000028717:mmu-miR-126a-3p,ENSMUSG00000009555:mmu-miR-1a-3p,ENSMUSG00000048251:mmu-miR-16-5p,ENSMUSG00000068457:mmu-miR-1b-5p,ENSMUSG00000048540:mmu-miR-1903,ENSMUSG00000038331:mmu-miR-1b-5p,ENSMUSG00000024563:mmu-miR-140-3p,ENSMUSG00000023333:mmu-miR-1903,ENSMUSG00000041515:mmu-miR-451a,ENSMUSG00000015605:mmu-miR-1a-3p,ENS…
Biological Process	GO:0045860	positive regulation of protein kinase activity	28	825	4.06329e-07	8.04937e-06	ENSMUSG00000027164:mmu-miR-144-3p,ENSMUSG00000006699:mmu-miR-1a-3p,ENSMUSG00000039005:mmu-miR-1b-5p,ENSMUSG00000031392:mmu-miR-142a-3p,ENSMUSG00000017652:mmu-miR-16-5p,ENSMUSG00000024401:mmu-miR-19a-3p,ENSMUSG00000049791:mmu-miR-19a-3p,ENSMUSG00000026349:mmu-miR-16-5p,ENSMUSG00000050697:mmu-miR-144-3p,ENSMUSG00000050697:mmu-miR-451a,ENSMUSG00000009900:mmu-miR-16-5p,ENSMUSG00000033307:mmu-miR-451a…
Biological Process	GO:0001667	ameboidal-type cell migration	24	635	4.23704e-07	8.37265e-06	ENSMUSG00000006699:mmu-miR-1a-3p,ENSMUSG00000090935:mmu-miR-1903,ENSMUSG00000028517:mmu-miR-16-5p,ENSMUSG00000066551:mmu-miR-142a-3p,ENSMUSG00000021109:mmu-miR-144-3p,ENSMUSG00000028086:mmu-miR-25-3p,ENSMUSG00000023951:mmu-miR-16-5p,ENSMUSG00000023951:mmu-miR-126a-3p,ENSMUSG00000059895:mmu-miR-144-3p,ENSMUSG00000026193:mmu-miR-1a-3p,ENSMUSG00000026193:mmu-miR-140-3p,ENSMUSG00000037225:mmu-miR-16-…
Biological Process	GO:0032094	response to food	9	82	4.31925e-07	8.51386e-06	ENSMUSG00000078680:mmu-miR-1a-3p,ENSMUSG00000030525:mmu-miR-19a-3p,ENSMUSG00000032788:mmu-miR-1b-5p,ENSMUSG00000073830:mmu-miR-1a-3p,ENSMUSG00000078673:mmu-miR-1a-3p,ENSMUSG00000073834:mmu-miR-1a-3p,ENSMUSG00000073834:mmu-let-7i-5p,ENSMUSG00000048482:mmu-miR-1a-3p,ENSMUSG00000096688:mmu-miR-1a-3p,ENSMUSG00000096688:mmu-let-7i-5p,ENSMUSG00000094793:mmu-miR-1a-3p
Biological Process	GO:0001503	ossification	24	636	4.35748e-07	8.56792e-06	ENSMUSG00000040289:mmu-miR-451a,ENSMUSG00000022952:mmu-miR-126a-3p,ENSMUSG00000021756:mmu-miR-142a-3p,ENSMUSG00000030201:mmu-miR-19a-3p,ENSMUSG00000027951:mmu-miR-1a-3p,ENSMUSG00000052155:mmu-miR-1b-5p,ENSMUSG00000057329:mmu-miR-16-5p,ENSMUSG00000027276:mmu-miR-16-5p,ENSMUSG00000002881:mmu-miR-1903,ENSMUSG00000020053:mmu-miR-1a-3p,ENSMUSG00000029816:mmu-miR-1903,ENSMUSG00000038193:mmu-miR-1a-3p,E…
Biological Process	GO:0048858	cell projection morphogenesis	32	1032	4.40354e-07	8.63704e-06	ENSMUSG00000009900:mmu-miR-16-5p,ENSMUSG00000059921:mmu-miR-144-3p,ENSMUSG00000030223:mmu-miR-1903,ENSMUSG00000049336:mmu-miR-451a,ENSMUSG00000048251:mmu-miR-16-5p,ENSMUSG00000039086:mmu-miR-1b-5p,ENSMUSG00000020099:mmu-miR-1b-5p,ENSMUSG00000020315:mmu-miR-144-3p,ENSMUSG00000048482:mmu-miR-1a-3p,ENSMUSG00000060534:mmu-miR-1903,ENSMUSG00000005958:mmu-miR-1b-5p,ENSMUSG00000030557:mmu-miR-1a-3p,ENSM…
Biological Process	GO:0045913	positive regulation of carbohydrate metabolic process	13	195	4.58634e-07	8.97338e-06	ENSMUSG00000096688:mmu-miR-1a-3p,ENSMUSG00000096688:mmu-let-7i-5p,ENSMUSG00000094793:mmu-miR-1a-3p,ENSMUSG00000021109:mmu-miR-144-3p,ENSMUSG00000050697:mmu-miR-144-3p,ENSMUSG00000050697:mmu-miR-451a,ENSMUSG00000078673:mmu-miR-1a-3p,ENSMUSG00000073834:mmu-miR-1a-3p,ENSMUSG00000073834:mmu-let-7i-5p,ENSMUSG00000066551:mmu-miR-142a-3p,ENSMUSG00000073830:mmu-miR-1a-3p,ENSMUSG00000055980:mmu-miR-126a-3…
Cellular Component	GO:0031226	intrinsic component of plasma membrane	50	2056	4.62727e-07	9.03117e-06	ENSMUSG00000021549:mmu-miR-1a-3p,ENSMUSG00000001175:mmu-miR-1a-3p,ENSMUSG00000005958:mmu-miR-1b-5p,ENSMUSG00000019647:mmu-miR-142a-3p,ENSMUSG00000032413:mmu-miR-1b-5p,ENSMUSG00000008590:mmu-miR-1903,ENSMUSG00000052155:mmu-miR-1b-5p,ENSMUSG00000026251:mmu-miR-19a-3p,ENSMUSG00000027087:mmu-miR-16-5p,ENSMUSG00000030084:mmu-miR-1b-5p,ENSMUSG00000036438:mmu-miR-1a-3p,ENSMUSG00000019838:mmu-miR-1b-5p,E…
Biological Process	GO:0046883	regulation of hormone secretion	20	461	4.77003e-07	9.28692e-06	ENSMUSG00000025746:mmu-let-7i-5p,ENSMUSG00000025746:mmu-miR-142a-3p,ENSMUSG00000055980:mmu-miR-126a-3p,ENSMUSG00000052155:mmu-miR-1b-5p,ENSMUSG00000027273:mmu-miR-19a-3p,ENSMUSG00000055116:mmu-miR-142a-3p,ENSMUSG00000022952:mmu-miR-126a-3p,ENSMUSG00000021756:mmu-miR-142a-3p,ENSMUSG00000094793:mmu-miR-1a-3p,ENSMUSG00000030557:mmu-miR-1a-3p,ENSMUSG00000078673:mmu-miR-1a-3p,ENSMUSG00000034908:mmu-mi…
Biological Process	GO:0014911	positive regulation of smooth muscle cell migration	9	83	4.79605e-07	9.30119e-06	ENSMUSG00000066551:mmu-miR-142a-3p,ENSMUSG00000021756:mmu-miR-142a-3p,ENSMUSG00000026313:mmu-miR-1a-3p,ENSMUSG00000033792:mmu-miR-1b-5p,ENSMUSG00000050953:mmu-miR-1a-3p,ENSMUSG00000020053:mmu-miR-1a-3p,ENSMUSG00000022346:mmu-miR-451a,ENSMUSG00000033307:mmu-miR-451a,ENSMUSG00000057329:mmu-miR-16-5p
Molecular Function	GO:0000988	transcription factor activity, protein binding	29	882	4.80084e-07	9.30119e-06	ENSMUSG00000022306:mmu-miR-19a-3p,ENSMUSG00000000902:mmu-miR-1a-3p,ENSMUSG00000026313:mmu-miR-1a-3p,ENSMUSG00000020542:mmu-miR-1a-3p,ENSMUSG00000042292:mmu-miR-1a-3p,ENSMUSG00000009900:mmu-miR-16-5p,ENSMUSG00000021109:mmu-miR-144-3p,ENSMUSG00000057156:mmu-miR-142a-3p,ENSMUSG00000037395:mmu-miR-144-3p,ENSMUSG00000024921:mmu-miR-142a-3p,ENSMUSG00000037225:mmu-miR-16-5p,ENSMUSG00000070348:mmu-miR-16…
Molecular Function	GO:0001012	RNA polymerase II regulatory region DNA binding	30	933	4.83096e-07	9.33671e-06	ENSMUSG00000078619:mmu-miR-1a-3p,ENSMUSG00000027210:mmu-let-7i-5p,ENSMUSG00000015709:mmu-miR-451a,ENSMUSG00000026932:mmu-miR-1b-5p,ENSMUSG00000028890:mmu-miR-1b-5p,ENSMUSG00000052684:mmu-miR-16-5p,ENSMUSG00000034957:mmu-miR-144-3p,ENSMUSG00000027104:mmu-miR-1b-5p,ENSMUSG00000027104:mmu-miR-451a,ENSMUSG00000002111:mmu-miR-126a-3p,ENSMUSG00000022346:mmu-miR-451a,ENSMUSG00000003847:mmu-miR-1a-3p,ENS…
Biological Process	GO:0035050	embryonic heart tube development	10	108	4.92747e-07	9.50006e-06	ENSMUSG00000038193:mmu-miR-1a-3p,ENSMUSG00000054611:mmu-miR-19a-3p,ENSMUSG00000050953:mmu-miR-1a-3p,ENSMUSG00000030201:mmu-miR-19a-3p,ENSMUSG00000057123:mmu-miR-144-3p,ENSMUSG00000022528:mmu-miR-1a-3p,ENSMUSG00000021944:mmu-miR-1a-3p,ENSMUSG00000021109:mmu-miR-144-3p,ENSMUSG00000009900:mmu-miR-16-5p,ENSMUSG00000015605:mmu-miR-1a-3p
Molecular Function	GO:0003705	transcription factor activity, RNA polymerase II distal enhancer sequence-specific binding	11	136	5.21862e-07	1.0037e-05	ENSMUSG00000045515:mmu-miR-140-3p,ENSMUSG00000036144:mmu-miR-1a-3p,ENSMUSG00000030557:mmu-miR-1a-3p,ENSMUSG00000021944:mmu-miR-1a-3p,ENSMUSG00000021109:mmu-miR-144-3p,ENSMUSG00000015605:mmu-miR-1a-3p,ENSMUSG00000052684:mmu-miR-16-5p,ENSMUSG00000004872:mmu-miR-1a-3p,ENSMUSG00000027104:mmu-miR-1b-5p,ENSMUSG00000027104:mmu-miR-451a,ENSMUSG00000034957:mmu-miR-144-3p,ENSMUSG00000002111:mmu-miR-126a-3p
Biological Process	GO:0034645	cellular macromolecule biosynthetic process	171	10836	5.25903e-07	1.00902e-05	ENSMUSG00000048482:mmu-miR-1a-3p,ENSMUSG00000046876:mmu-miR-19a-3p,ENSMUSG00000002068:mmu-miR-16-5p,ENSMUSG00000062908:mmu-miR-19a-3p,ENSMUSG00000009073:mmu-let-7i-5p,ENSMUSG00000054272:mmu-miR-1b-5p,ENSMUSG00000027951:mmu-miR-1a-3p,ENSMUSG00000052155:mmu-miR-1b-5p,ENSMUSG00000057329:mmu-miR-16-5p,ENSMUSG00000032178:mmu-miR-19a-3p,ENSMUSG00000020053:mmu-miR-1a-3p,ENSMUSG00000054387:mmu-miR-16-5p,…
Biological Process	GO:0071214	cellular response to abiotic stimulus	21	508	5.41126e-07	1.03572e-05	ENSMUSG00000022346:mmu-miR-451a,ENSMUSG00000036438:mmu-miR-1a-3p,ENSMUSG00000061665:mmu-miR-142a-3p,ENSMUSG00000020053:mmu-miR-1a-3p,ENSMUSG00000055980:mmu-miR-126a-3p,ENSMUSG00000014074:mmu-miR-16-5p,ENSMUSG00000028967:mmu-miR-126a-3p,ENSMUSG00000001175:mmu-miR-1a-3p,ENSMUSG00000028086:mmu-miR-25-3p,ENSMUSG00000036112:mmu-miR-1903,ENSMUSG00000050953:mmu-miR-1a-3p,ENSMUSG00000031293:mmu-miR-1903,…
Biological Process	GO:0043406	positive regulation of MAP kinase activity	17	342	5.42632e-07	1.0361e-05	ENSMUSG00000027164:mmu-miR-144-3p,ENSMUSG00000031392:mmu-miR-142a-3p,ENSMUSG00000039005:mmu-miR-1b-5p,ENSMUSG00000017652:mmu-miR-16-5p,ENSMUSG00000024401:mmu-miR-19a-3p,ENSMUSG00000049791:mmu-miR-19a-3p,ENSMUSG00000050697:mmu-miR-144-3p,ENSMUSG00000050697:mmu-miR-451a,ENSMUSG00000033307:mmu-miR-451a,ENSMUSG00000023951:mmu-miR-16-5p,ENSMUSG00000023951:mmu-miR-126a-3p,ENSMUSG00000030525:mmu-miR-19a…
Biological Process	GO:0003206	cardiac chamber morphogenesis	12	167	5.71615e-07	1.08882e-05	ENSMUSG00000030201:mmu-miR-19a-3p,ENSMUSG00000017491:mmu-miR-1a-3p,ENSMUSG00000040289:mmu-miR-451a,ENSMUSG00000057123:mmu-miR-144-3p,ENSMUSG00000022528:mmu-miR-1a-3p,ENSMUSG00000021109:mmu-miR-144-3p,ENSMUSG00000021944:mmu-miR-1a-3p,ENSMUSG00000015605:mmu-miR-1a-3p,ENSMUSG00000022306:mmu-miR-19a-3p,ENSMUSG00000027276:mmu-miR-16-5p,ENSMUSG00000040752:mmu-miR-1a-3p,ENSMUSG00000038193:mmu-miR-1a-3p
Biological Process	GO:0048545	response to steroid hormone	28	840	5.80231e-07	1.10258e-05	ENSMUSG00000028967:mmu-miR-126a-3p,ENSMUSG00000062908:mmu-miR-19a-3p,ENSMUSG00000033400:mmu-miR-1903,ENSMUSG00000027665:mmu-miR-1b-5p,ENSMUSG00000048482:mmu-miR-1a-3p,ENSMUSG00000040289:mmu-miR-451a,ENSMUSG00000017491:mmu-miR-1a-3p,ENSMUSG00000001175:mmu-miR-1a-3p,ENSMUSG00000002068:mmu-miR-16-5p,ENSMUSG00000032788:mmu-miR-1b-5p,ENSMUSG00000055116:mmu-miR-142a-3p,ENSMUSG00000020053:mmu-miR-1a-3p,…
Biological Process	GO:0033674	positive regulation of kinase activity	29	891	5.89434e-07	1.11739e-05	ENSMUSG00000023951:mmu-miR-16-5p,ENSMUSG00000023951:mmu-miR-126a-3p,ENSMUSG00000028086:mmu-miR-25-3p,ENSMUSG00000050395:mmu-miR-1903,ENSMUSG00000033307:mmu-miR-451a,ENSMUSG00000030525:mmu-miR-19a-3p,ENSMUSG00000036707:mmu-miR-144-3p,ENSMUSG00000036707:mmu-miR-451a,ENSMUSG00000023050:mmu-miR-19a-3p,ENSMUSG00000005268:mmu-miR-1903,ENSMUSG00000070348:mmu-miR-16-5p,ENSMUSG00000037225:mmu-miR-16-5p,EN…
Biological Process	GO:0009314	response to radiation	29	895	6.45082e-07	1.21996e-05	ENSMUSG00000026434:mmu-miR-451a,ENSMUSG00000031293:mmu-miR-1903,ENSMUSG00000028086:mmu-miR-25-3p,ENSMUSG00000036112:mmu-miR-1903,ENSMUSG00000070348:mmu-miR-16-5p,ENSMUSG00000090877:mmu-miR-1a-3p,ENSMUSG00000058793:mmu-miR-1b-5p,ENSMUSG00000032113:mmu-miR-1b-5p,ENSMUSG00000054387:mmu-miR-16-5p,ENSMUSG00000050697:mmu-miR-144-3p,ENSMUSG00000050697:mmu-miR-451a,ENSMUSG00000021109:mmu-miR-144-3p,ENSMU…
Biological Process	GO:0006111	regulation of gluconeogenesis	10	112	6.91542e-07	1.30471e-05	ENSMUSG00000073830:mmu-miR-1a-3p,ENSMUSG00000062908:mmu-miR-19a-3p,ENSMUSG00000078673:mmu-miR-1a-3p,ENSMUSG00000073834:mmu-miR-1a-3p,ENSMUSG00000073834:mmu-let-7i-5p,ENSMUSG00000021109:mmu-miR-144-3p,ENSMUSG00000050697:mmu-miR-144-3p,ENSMUSG00000050697:mmu-miR-451a,ENSMUSG00000096688:mmu-miR-1a-3p,ENSMUSG00000096688:mmu-let-7i-5p,ENSMUSG00000094793:mmu-miR-1a-3p,ENSMUSG00000078680:mmu-miR-1a-3p,E…
Biological Process	GO:0044710	single-organism metabolic process	132	7821	7.02197e-07	1.32166e-05	ENSMUSG00000022505:mmu-miR-1903,ENSMUSG00000022892:mmu-miR-16-5p,ENSMUSG00000014074:mmu-miR-16-5p,ENSMUSG00000039958:mmu-miR-1b-5p,ENSMUSG00000000693:mmu-miR-1b-5p,ENSMUSG00000022346:mmu-miR-451a,ENSMUSG00000055980:mmu-miR-126a-3p,ENSMUSG00000005533:mmu-miR-1a-3p,ENSMUSG00000030302:mmu-let-7i-5p,ENSMUSG00000033792:mmu-miR-1b-5p,ENSMUSG00000031483:mmu-miR-16-5p,ENSMUSG00000031834:mmu-miR-126a-3p,E…
Biological Process	GO:0031099	regeneration	23	607	7.0744e-07	1.32838e-05	ENSMUSG00000027276:mmu-miR-16-5p,ENSMUSG00000057329:mmu-miR-16-5p,ENSMUSG00000006678:mmu-miR-1a-3p,ENSMUSG00000003032:mmu-miR-1a-3p,ENSMUSG00000052684:mmu-miR-16-5p,ENSMUSG00000027715:mmu-miR-1b-5p,ENSMUSG00000041075:mmu-miR-1a-3p,ENSMUSG00000041075:mmu-miR-126a-3p,ENSMUSG00000032913:mmu-miR-144-3p,ENSMUSG00000034957:mmu-miR-144-3p,ENSMUSG00000022346:mmu-miR-451a,ENSMUSG00000020053:mmu-miR-1a-3p,…
Biological Process	GO:0010629	negative regulation of gene expression	83	4249	7.27914e-07	1.36359e-05	ENSMUSG00000057156:mmu-miR-142a-3p,ENSMUSG00000078680:mmu-miR-1a-3p,ENSMUSG00000038331:mmu-miR-1b-5p,ENSMUSG00000033644:mmu-miR-1b-5p,ENSMUSG00000030744:mmu-miR-1b-5p,ENSMUSG00000070348:mmu-miR-16-5p,ENSMUSG00000006699:mmu-miR-1a-3p,ENSMUSG00000073830:mmu-miR-1a-3p,ENSMUSG00000009555:mmu-miR-1a-3p,ENSMUSG00000031930:mmu-miR-25-3p,ENSMUSG00000002881:mmu-miR-1903,ENSMUSG00000026012:mmu-miR-1b-5p,EN…
Biological Process	GO:0048812	neuron projection morphogenesis	31	1005	7.47918e-07	1.39776e-05	ENSMUSG00000033792:mmu-miR-1b-5p,ENSMUSG00000059921:mmu-miR-144-3p,ENSMUSG00000009900:mmu-miR-16-5p,ENSMUSG00000063626:mmu-miR-1903,ENSMUSG00000041120:mmu-miR-1903,ENSMUSG00000005533:mmu-miR-1a-3p,ENSMUSG00000054263:mmu-miR-144-3p,ENSMUSG00000026193:mmu-miR-1a-3p,ENSMUSG00000026193:mmu-miR-140-3p,ENSMUSG00000020099:mmu-miR-1b-5p,ENSMUSG00000051650:mmu-miR-1b-5p,ENSMUSG00000023951:mmu-miR-16-5p,EN…
Biological Process	GO:0001702	gastrulation with mouth forming second	7	45	7.60935e-07	1.41874e-05	ENSMUSG00000052155:mmu-miR-1b-5p,ENSMUSG00000021944:mmu-miR-1a-3p,ENSMUSG00000015605:mmu-miR-1a-3p,ENSMUSG00000030201:mmu-miR-19a-3p,ENSMUSG00000068299:mmu-miR-19a-3p,ENSMUSG00000033634:mmu-miR-19a-3p,ENSMUSG00000028517:mmu-miR-16-5p
Biological Process	GO:0042493	response to drug	31	1006	7.63684e-07	1.42052e-05	ENSMUSG00000002068:mmu-miR-16-5p,ENSMUSG00000021549:mmu-miR-1a-3p,ENSMUSG00000048482:mmu-miR-1a-3p,ENSMUSG00000021944:mmu-miR-1a-3p,ENSMUSG00000022285:mmu-miR-451a,ENSMUSG00000017466:mmu-miR-19a-3p,ENSMUSG00000061742:mmu-miR-1903,ENSMUSG00000062908:mmu-miR-19a-3p,ENSMUSG00000013663:mmu-miR-19a-3p,ENSMUSG00000013663:mmu-miR-19a-3p,ENSMUSG00000013663:mmu-miR-144-3p,ENSMUSG00000025746:mmu-let-7i-5p,…
Biological Process	GO:0033002	muscle cell proliferation	18	391	7.67269e-07	1.42385e-05	ENSMUSG00000026313:mmu-miR-1a-3p,ENSMUSG00000024401:mmu-miR-19a-3p,ENSMUSG00000021109:mmu-miR-144-3p,ENSMUSG00000022306:mmu-miR-19a-3p,ENSMUSG00000027164:mmu-miR-144-3p,ENSMUSG00000005533:mmu-miR-1a-3p,ENSMUSG00000031392:mmu-miR-142a-3p,ENSMUSG00000037225:mmu-miR-16-5p,ENSMUSG00000023951:mmu-miR-16-5p,ENSMUSG00000023951:mmu-miR-126a-3p,ENSMUSG00000050953:mmu-miR-1a-3p,ENSMUSG00000021944:mmu-miR-1…
Biological Process	GO:0014074	response to purine-containing compound	16	312	7.76378e-07	1.43739e-05	ENSMUSG00000052684:mmu-miR-16-5p,ENSMUSG00000055980:mmu-miR-126a-3p,ENSMUSG00000057329:mmu-miR-16-5p,ENSMUSG00000025746:mmu-let-7i-5p,ENSMUSG00000025746:mmu-miR-142a-3p,ENSMUSG00000020053:mmu-miR-1a-3p,ENSMUSG00000002068:mmu-miR-16-5p,ENSMUSG00000013663:mmu-miR-19a-3p,ENSMUSG00000013663:mmu-miR-19a-3p,ENSMUSG00000013663:mmu-miR-144-3p,ENSMUSG00000022892:mmu-miR-16-5p,ENSMUSG00000027716:mmu-miR-45…
Biological Process	GO:0055007	cardiac muscle cell differentiation	12	172	7.83135e-07	1.44316e-05	ENSMUSG00000023951:mmu-miR-16-5p,ENSMUSG00000023951:mmu-miR-126a-3p,ENSMUSG00000020053:mmu-miR-1a-3p,ENSMUSG00000040752:mmu-miR-1a-3p,ENSMUSG00000004872:mmu-miR-1a-3p,ENSMUSG00000041616:mmu-miR-1a-3p,ENSMUSG00000062908:mmu-miR-19a-3p,ENSMUSG00000020542:mmu-miR-1a-3p,ENSMUSG00000017491:mmu-miR-1a-3p,ENSMUSG00000030557:mmu-miR-1a-3p,ENSMUSG00000015605:mmu-miR-1a-3p,ENSMUSG00000021944:mmu-miR-1a-3p,…
Molecular Function	GO:0001085	RNA polymerase II transcription factor binding	12	172	7.83135e-07	1.44316e-05	ENSMUSG00000020593:mmu-miR-1903,ENSMUSG00000022306:mmu-miR-19a-3p,ENSMUSG00000028717:mmu-miR-126a-3p,ENSMUSG00000021944:mmu-miR-1a-3p,ENSMUSG00000030557:mmu-miR-1a-3p,ENSMUSG00000048540:mmu-miR-1903,ENSMUSG00000002111:mmu-miR-126a-3p,ENSMUSG00000031930:mmu-miR-25-3p,ENSMUSG00000027104:mmu-miR-1b-5p,ENSMUSG00000027104:mmu-miR-451a,ENSMUSG00000052684:mmu-miR-16-5p,ENSMUSG00000003032:mmu-miR-1a-3p,E…
Biological Process	GO:0003143	embryonic heart tube morphogenesis	9	88	7.92768e-07	1.45752e-05	ENSMUSG00000038193:mmu-miR-1a-3p,ENSMUSG00000050953:mmu-miR-1a-3p,ENSMUSG00000054611:mmu-miR-19a-3p,ENSMUSG00000030201:mmu-miR-19a-3p,ENSMUSG00000022528:mmu-miR-1a-3p,ENSMUSG00000021109:mmu-miR-144-3p,ENSMUSG00000021944:mmu-miR-1a-3p,ENSMUSG00000009900:mmu-miR-16-5p,ENSMUSG00000015605:mmu-miR-1a-3p
Biological Process	GO:0071902	positive regulation of protein serine/threonine kinase activity	23	612	8.13761e-07	1.49265e-05	ENSMUSG00000001175:mmu-miR-1a-3p,ENSMUSG00000048482:mmu-miR-1a-3p,ENSMUSG00000020053:mmu-miR-1a-3p,ENSMUSG00000036438:mmu-miR-1a-3p,ENSMUSG00000031555:mmu-miR-126a-3p,ENSMUSG00000022788:mmu-miR-16-5p,ENSMUSG00000027164:mmu-miR-144-3p,ENSMUSG00000017652:mmu-miR-16-5p,ENSMUSG00000031392:mmu-miR-142a-3p,ENSMUSG00000039005:mmu-miR-1b-5p,ENSMUSG00000024401:mmu-miR-19a-3p,ENSMUSG00000049791:mmu-miR-19a…
Biological Process	GO:0048667	cell morphogenesis involved in neuron differentiation	30	958	8.32895e-07	1.52422e-05	ENSMUSG00000022892:mmu-miR-16-5p,ENSMUSG00000020315:mmu-miR-144-3p,ENSMUSG00000013663:mmu-miR-19a-3p,ENSMUSG00000013663:mmu-miR-19a-3p,ENSMUSG00000013663:mmu-miR-144-3p,ENSMUSG00000027852:mmu-miR-1b-5p,ENSMUSG00000068327:mmu-miR-1a-3p,ENSMUSG00000060534:mmu-miR-1903,ENSMUSG00000005958:mmu-miR-1b-5p,ENSMUSG00000048482:mmu-miR-1a-3p,ENSMUSG00000030557:mmu-miR-1a-3p,ENSMUSG00000019647:mmu-miR-142a-3…
Biological Process	GO:0009987	cellular process	359	27966	8.49494e-07	1.55101e-05	ENSMUSG00000015605:mmu-miR-1a-3p,ENSMUSG00000069053:mmu-miR-144-3p,ENSMUSG00000069053:mmu-miR-25-3p,ENSMUSG00000028165:mmu-miR-1b-5p,ENSMUSG00000021756:mmu-miR-142a-3p,ENSMUSG00000013878:mmu-miR-1a-3p,ENSMUSG00000096688:mmu-miR-1a-3p,ENSMUSG00000096688:mmu-let-7i-5p,ENSMUSG00000042845:mmu-miR-1b-5p,ENSMUSG00000020868:mmu-miR-25-3p,ENSMUSG00000049625:mmu-miR-16-5p,ENSMUSG00000023050:mmu-miR-19a-3p…
Biological Process	GO:0019725	cellular homeostasis	40	1507	8.58616e-07	1.56406e-05	ENSMUSG00000000902:mmu-miR-1a-3p,ENSMUSG00000073830:mmu-miR-1a-3p,ENSMUSG00000066551:mmu-miR-142a-3p,ENSMUSG00000030525:mmu-miR-19a-3p,ENSMUSG00000026434:mmu-miR-451a,ENSMUSG00000078680:mmu-miR-1a-3p,ENSMUSG00000027716:mmu-miR-451a,ENSMUSG00000039953:mmu-miR-451a,ENSMUSG00000001175:mmu-miR-1a-3p,ENSMUSG00000094793:mmu-miR-1a-3p,ENSMUSG00000030557:mmu-miR-1a-3p,ENSMUSG00000027665:mmu-miR-1b-5p,ENS…
Biological Process	GO:0010907	positive regulation of glucose metabolic process	11	143	8.61766e-07	1.5662e-05	ENSMUSG00000073830:mmu-miR-1a-3p,ENSMUSG00000050697:mmu-miR-144-3p,ENSMUSG00000050697:mmu-miR-451a,ENSMUSG00000021109:mmu-miR-144-3p,ENSMUSG00000073834:mmu-miR-1a-3p,ENSMUSG00000073834:mmu-let-7i-5p,ENSMUSG00000078673:mmu-miR-1a-3p,ENSMUSG00000066551:mmu-miR-142a-3p,ENSMUSG00000096688:mmu-miR-1a-3p,ENSMUSG00000096688:mmu-let-7i-5p,ENSMUSG00000094793:mmu-miR-1a-3p,ENSMUSG00000020053:mmu-miR-1a-3p,…
Biological Process	GO:0030072	peptide hormone secretion	19	437	8.92879e-07	1.61903e-05	ENSMUSG00000024563:mmu-miR-140-3p,ENSMUSG00000050953:mmu-miR-1a-3p,ENSMUSG00000078680:mmu-miR-1a-3p,ENSMUSG00000027712:mmu-miR-1a-3p,ENSMUSG00000096688:mmu-miR-1a-3p,ENSMUSG00000096688:mmu-let-7i-5p,ENSMUSG00000024401:mmu-miR-19a-3p,ENSMUSG00000021109:mmu-miR-144-3p,ENSMUSG00000073834:mmu-miR-1a-3p,ENSMUSG00000073834:mmu-let-7i-5p,ENSMUSG00000033685:mmu-miR-1a-3p,ENSMUSG00000073830:mmu-miR-1a-3p,…
Biological Process	GO:0051130	positive regulation of cellular component organization	54	2351	8.98479e-07	1.62547e-05	ENSMUSG00000028086:mmu-miR-25-3p,ENSMUSG00000039086:mmu-miR-1b-5p,ENSMUSG00000049336:mmu-miR-451a,ENSMUSG00000023333:mmu-miR-1903,ENSMUSG00000024944:mmu-miR-16-5p,ENSMUSG00000033644:mmu-miR-1b-5p,ENSMUSG00000030744:mmu-miR-1b-5p,ENSMUSG00000006699:mmu-miR-1a-3p,ENSMUSG00000000902:mmu-miR-1a-3p,ENSMUSG00000024401:mmu-miR-19a-3p,ENSMUSG00000027712:mmu-miR-1a-3p,ENSMUSG00000066551:mmu-miR-142a-3p,EN…
Biological Process	GO:0003012	muscle system process	24	663	9.08001e-07	1.63895e-05	ENSMUSG00000030557:mmu-miR-1a-3p,ENSMUSG00000021944:mmu-miR-1a-3p,ENSMUSG00000015605:mmu-miR-1a-3p,ENSMUSG00000022952:mmu-miR-126a-3p,ENSMUSG00000021756:mmu-miR-142a-3p,ENSMUSG00000001175:mmu-miR-1a-3p,ENSMUSG00000028967:mmu-miR-126a-3p,ENSMUSG00000006678:mmu-miR-1a-3p,ENSMUSG00000003032:mmu-miR-1a-3p,ENSMUSG00000036438:mmu-miR-1a-3p,ENSMUSG00000020053:mmu-miR-1a-3p,ENSMUSG00000038193:mmu-miR-1a-…
Biological Process	GO:0003205	cardiac chamber development	14	242	9.23322e-07	1.66282e-05	ENSMUSG00000022306:mmu-miR-19a-3p,ENSMUSG00000022528:mmu-miR-1a-3p,ENSMUSG00000021109:mmu-miR-144-3p,ENSMUSG00000021944:mmu-miR-1a-3p,ENSMUSG00000015605:mmu-miR-1a-3p,ENSMUSG00000057123:mmu-miR-144-3p,ENSMUSG00000054387:mmu-miR-16-5p,ENSMUSG00000040289:mmu-miR-451a,ENSMUSG00000030201:mmu-miR-19a-3p,ENSMUSG00000017491:mmu-miR-1a-3p,ENSMUSG00000020542:mmu-miR-1a-3p,ENSMUSG00000038193:mmu-miR-1a-3p,…
Biological Process	GO:0030099	myeloid cell differentiation	25	712	9.33311e-07	1.677e-05	ENSMUSG00000027951:mmu-miR-1a-3p,ENSMUSG00000038227:mmu-miR-126a-3p,ENSMUSG00000041515:mmu-miR-451a,ENSMUSG00000022952:mmu-miR-126a-3p,ENSMUSG00000015605:mmu-miR-1a-3p,ENSMUSG00000038145:mmu-miR-451a,ENSMUSG00000040943:mmu-miR-19a-3p,ENSMUSG00000022346:mmu-miR-451a,ENSMUSG00000034957:mmu-miR-144-3p,ENSMUSG00000002111:mmu-miR-126a-3p,ENSMUSG00000032035:mmu-miR-1a-3p,ENSMUSG00000027210:mmu-let-7i-5…
Biological Process	GO:0043085	positive regulation of catalytic activity	56	2490	1.06164e-06	1.89468e-05	ENSMUSG00000026029:mmu-miR-1b-5p,ENSMUSG00000005268:mmu-miR-1903,ENSMUSG00000070348:mmu-miR-16-5p,ENSMUSG00000000594:mmu-miR-451a,ENSMUSG00000030744:mmu-miR-1b-5p,ENSMUSG00000050395:mmu-miR-1903,ENSMUSG00000028086:mmu-miR-25-3p,ENSMUSG00000030525:mmu-miR-19a-3p,ENSMUSG00000036707:mmu-miR-144-3p,ENSMUSG00000036707:mmu-miR-451a,ENSMUSG00000024401:mmu-miR-19a-3p,ENSMUSG00000026349:mmu-miR-16-5p,ENSM…
Biological Process	GO:0043255	regulation of carbohydrate biosynthetic process	12	177	1.06137e-06	1.89468e-05	ENSMUSG00000096688:mmu-miR-1a-3p,ENSMUSG00000096688:mmu-let-7i-5p,ENSMUSG00000094793:mmu-miR-1a-3p,ENSMUSG00000050697:mmu-miR-144-3p,ENSMUSG00000050697:mmu-miR-451a,ENSMUSG00000021109:mmu-miR-144-3p,ENSMUSG00000078673:mmu-miR-1a-3p,ENSMUSG00000073834:mmu-miR-1a-3p,ENSMUSG00000073834:mmu-let-7i-5p,ENSMUSG00000073830:mmu-miR-1a-3p,ENSMUSG00000062908:mmu-miR-19a-3p,ENSMUSG00000025746:mmu-let-7i-5p,E…
Biological Process	GO:0050709	negative regulation of protein secretion	13	210	1.06133e-06	1.89468e-05	ENSMUSG00000078673:mmu-miR-1a-3p,ENSMUSG00000030557:mmu-miR-1a-3p,ENSMUSG00000073834:mmu-miR-1a-3p,ENSMUSG00000073834:mmu-let-7i-5p,ENSMUSG00000024401:mmu-miR-19a-3p,ENSMUSG00000096688:mmu-miR-1a-3p,ENSMUSG00000096688:mmu-let-7i-5p,ENSMUSG00000027712:mmu-miR-1a-3p,ENSMUSG00000094793:mmu-miR-1a-3p,ENSMUSG00000073830:mmu-miR-1a-3p,ENSMUSG00000033685:mmu-miR-1a-3p,ENSMUSG00000055980:mmu-miR-126a-3p,…
Biological Process	GO:0120035	regulation of plasma membrane bounded cell projection organization	34	1184	1.07753e-06	1.91442e-05	ENSMUSG00000049336:mmu-miR-451a,ENSMUSG00000039086:mmu-miR-1b-5p,ENSMUSG00000006699:mmu-miR-1a-3p,ENSMUSG00000039678:mmu-miR-1b-5p,ENSMUSG00000023206:mmu-miR-1b-5p,ENSMUSG00000009900:mmu-miR-16-5p,ENSMUSG00000066551:mmu-miR-142a-3p,ENSMUSG00000030084:mmu-miR-1b-5p,ENSMUSG00000003032:mmu-miR-1a-3p,ENSMUSG00000029104:mmu-miR-1b-5p,ENSMUSG00000006678:mmu-miR-1a-3p,ENSMUSG00000019647:mmu-miR-142a-3p,…
Biological Process	GO:1901699	cellular response to nitrogen compound	34	1184	1.07753e-06	1.91442e-05	ENSMUSG00000028967:mmu-miR-126a-3p,ENSMUSG00000027951:mmu-miR-1a-3p,ENSMUSG00000048482:mmu-miR-1a-3p,ENSMUSG00000020053:mmu-miR-1a-3p,ENSMUSG00000027715:mmu-miR-1b-5p,ENSMUSG00000063804:mmu-miR-1b-5p,ENSMUSG00000006678:mmu-miR-1a-3p,ENSMUSG00000003032:mmu-miR-1a-3p,ENSMUSG00000032113:mmu-miR-1b-5p,ENSMUSG00000050697:mmu-miR-144-3p,ENSMUSG00000050697:mmu-miR-451a,ENSMUSG00000029661:mmu-let-7i-5p,E…
Biological Process	GO:0014910	regulation of smooth muscle cell migration	10	118	1.1206e-06	1.98649e-05	ENSMUSG00000020053:mmu-miR-1a-3p,ENSMUSG00000050953:mmu-miR-1a-3p,ENSMUSG00000030084:mmu-miR-1b-5p,ENSMUSG00000022346:mmu-miR-451a,ENSMUSG00000033307:mmu-miR-451a,ENSMUSG00000057329:mmu-miR-16-5p,ENSMUSG00000066551:mmu-miR-142a-3p,ENSMUSG00000021756:mmu-miR-142a-3p,ENSMUSG00000033792:mmu-miR-1b-5p,ENSMUSG00000026313:mmu-miR-1a-3p
Cellular Component	GO:0044425	membrane part	182	11850	1.12771e-06	1.99464e-05	ENSMUSG00000022892:mmu-miR-16-5p,ENSMUSG00000022505:mmu-miR-1903,ENSMUSG00000034908:mmu-miR-451a,ENSMUSG00000046314:mmu-miR-1b-5p,ENSMUSG00000023033:mmu-miR-451a,ENSMUSG00000028184:mmu-miR-451a,ENSMUSG00000032913:mmu-miR-144-3p,ENSMUSG00000075033:mmu-miR-1b-5p,ENSMUSG00000027273:mmu-miR-19a-3p,ENSMUSG00000055980:mmu-miR-126a-3p,ENSMUSG00000020838:mmu-miR-16-5p,ENSMUSG00000005533:mmu-miR-1a-3p,ENS…
Biological Process	GO:0030855	epithelial cell differentiation	29	921	1.14301e-06	2.0172e-05	ENSMUSG00000021109:mmu-miR-144-3p,ENSMUSG00000030302:mmu-let-7i-5p,ENSMUSG00000022528:mmu-miR-1a-3p,ENSMUSG00000026380:mmu-miR-1b-5p,ENSMUSG00000048285:mmu-miR-1b-5p,ENSMUSG00000024401:mmu-miR-19a-3p,ENSMUSG00000006699:mmu-miR-1a-3p,ENSMUSG00000070348:mmu-miR-16-5p,ENSMUSG00000028945:mmu-miR-1a-3p,ENSMUSG00000037225:mmu-miR-16-5p,ENSMUSG00000005268:mmu-miR-1903,ENSMUSG00000048251:mmu-miR-16-5p,EN…
Molecular Function	GO:0033613	activating transcription factor binding	9	92	1.1579e-06	2.03893e-05	ENSMUSG00000052684:mmu-miR-16-5p,ENSMUSG00000024563:mmu-miR-140-3p,ENSMUSG00000039661:mmu-miR-1903,ENSMUSG00000048540:mmu-miR-1903,ENSMUSG00000038193:mmu-miR-1a-3p,ENSMUSG00000027104:mmu-miR-1b-5p,ENSMUSG00000027104:mmu-miR-451a,ENSMUSG00000030557:mmu-miR-1a-3p,ENSMUSG00000021944:mmu-miR-1a-3p,ENSMUSG00000026313:mmu-miR-1a-3p
Biological Process	GO:0010720	positive regulation of cell development	31	1027	1.17499e-06	2.05903e-05	ENSMUSG00000026193:mmu-miR-1a-3p,ENSMUSG00000026193:mmu-miR-140-3p,ENSMUSG00000028945:mmu-miR-1a-3p,ENSMUSG00000039086:mmu-miR-1b-5p,ENSMUSG00000033307:mmu-miR-451a,ENSMUSG00000025586:mmu-miR-1a-3p,ENSMUSG00000025586:mmu-miR-25-3p,ENSMUSG00000023951:mmu-miR-16-5p,ENSMUSG00000023951:mmu-miR-126a-3p,ENSMUSG00000066551:mmu-miR-142a-3p,ENSMUSG00000009900:mmu-miR-16-5p,ENSMUSG00000021109:mmu-miR-144-3…
Biological Process	GO:0120039	plasma membrane bounded cell projection morphogenesis	31	1027	1.17499e-06	2.05903e-05	ENSMUSG00000020315:mmu-miR-144-3p,ENSMUSG00000013663:mmu-miR-19a-3p,ENSMUSG00000013663:mmu-miR-19a-3p,ENSMUSG00000013663:mmu-miR-144-3p,ENSMUSG00000022892:mmu-miR-16-5p,ENSMUSG00000048482:mmu-miR-1a-3p,ENSMUSG00000060534:mmu-miR-1903,ENSMUSG00000005958:mmu-miR-1b-5p,ENSMUSG00000030557:mmu-miR-1a-3p,ENSMUSG00000019647:mmu-miR-142a-3p,ENSMUSG00000015605:mmu-miR-1a-3p,ENSMUSG00000027852:mmu-miR-1b-5…
Molecular Function	GO:0000989	transcription factor activity, transcription factor binding	28	871	1.17711e-06	2.05903e-05	ENSMUSG00000057156:mmu-miR-142a-3p,ENSMUSG00000070348:mmu-miR-16-5p,ENSMUSG00000037225:mmu-miR-16-5p,ENSMUSG00000024921:mmu-miR-142a-3p,ENSMUSG00000037395:mmu-miR-144-3p,ENSMUSG00000000902:mmu-miR-1a-3p,ENSMUSG00000022306:mmu-miR-19a-3p,ENSMUSG00000042292:mmu-miR-1a-3p,ENSMUSG00000009900:mmu-miR-16-5p,ENSMUSG00000021109:mmu-miR-144-3p,ENSMUSG00000020542:mmu-miR-1a-3p,ENSMUSG00000026313:mmu-miR-1a…
Biological Process	GO:0048660	regulation of smooth muscle cell proliferation	13	212	1.18039e-06	2.06022e-05	ENSMUSG00000031392:mmu-miR-142a-3p,ENSMUSG00000005533:mmu-miR-1a-3p,ENSMUSG00000027164:mmu-miR-144-3p,ENSMUSG00000021109:mmu-miR-144-3p,ENSMUSG00000024401:mmu-miR-19a-3p,ENSMUSG00000026313:mmu-miR-1a-3p,ENSMUSG00000020053:mmu-miR-1a-3p,ENSMUSG00000023951:mmu-miR-16-5p,ENSMUSG00000023951:mmu-miR-126a-3p,ENSMUSG00000022346:mmu-miR-451a,ENSMUSG00000037225:mmu-miR-16-5p,ENSMUSG00000052684:mmu-miR-16-…
Biological Process	GO:0033554	cellular response to stress	69	3346	1.1885e-06	2.06982e-05	ENSMUSG00000013663:mmu-miR-19a-3p,ENSMUSG00000013663:mmu-miR-19a-3p,ENSMUSG00000013663:mmu-miR-144-3p,ENSMUSG00000078673:mmu-miR-1a-3p,ENSMUSG00000089682:mmu-miR-16-5p,ENSMUSG00000021944:mmu-miR-1a-3p,ENSMUSG00000061665:mmu-miR-142a-3p,ENSMUSG00000027104:mmu-miR-1b-5p,ENSMUSG00000027104:mmu-miR-451a,ENSMUSG00000025746:mmu-let-7i-5p,ENSMUSG00000025746:mmu-miR-142a-3p,ENSMUSG00000032035:mmu-miR-1a-…
Biological Process	GO:0036120	cellular response to platelet-derived growth factor stimulus	7	48	1.19872e-06	2.08304e-05	ENSMUSG00000027715:mmu-miR-1b-5p,ENSMUSG00000033792:mmu-miR-1b-5p,ENSMUSG00000026193:mmu-miR-1a-3p,ENSMUSG00000026193:mmu-miR-140-3p,ENSMUSG00000021549:mmu-miR-1a-3p,ENSMUSG00000028967:mmu-miR-126a-3p,ENSMUSG00000050953:mmu-miR-1a-3p,ENSMUSG00000022346:mmu-miR-451a
Biological Process	GO:0009416	response to light stimulus	21	534	1.20185e-06	2.0839e-05	ENSMUSG00000028086:mmu-miR-25-3p,ENSMUSG00000036112:mmu-miR-1903,ENSMUSG00000031293:mmu-miR-1903,ENSMUSG00000070348:mmu-miR-16-5p,ENSMUSG00000032113:mmu-miR-1b-5p,ENSMUSG00000058793:mmu-miR-1b-5p,ENSMUSG00000024242:mmu-miR-1a-3p,ENSMUSG00000054387:mmu-miR-16-5p,ENSMUSG00000050697:mmu-miR-144-3p,ENSMUSG00000050697:mmu-miR-451a,ENSMUSG00000021109:mmu-miR-144-3p,ENSMUSG00000022346:mmu-miR-451a,ENSMU…
Cellular Component	GO:0044464	cell part	369	29094	1.26304e-06	2.18522e-05	ENSMUSG00000002068:mmu-miR-16-5p,ENSMUSG00000046876:mmu-miR-19a-3p,ENSMUSG00000005958:mmu-miR-1b-5p,ENSMUSG00000027951:mmu-miR-1a-3p,ENSMUSG00000052155:mmu-miR-1b-5p,ENSMUSG00000056429:mmu-miR-1a-3p,ENSMUSG00000020053:mmu-miR-1a-3p,ENSMUSG00000024401:mmu-miR-19a-3p,ENSMUSG00000066551:mmu-miR-142a-3p,ENSMUSG00000054537:mmu-miR-1903,ENSMUSG00000054387:mmu-miR-16-5p,ENSMUSG00000033540:mmu-miR-16-5p,…
Biological Process	GO:0032355	response to estradiol	18	405	1.2672e-06	2.18765e-05	ENSMUSG00000002068:mmu-miR-16-5p,ENSMUSG00000013663:mmu-miR-19a-3p,ENSMUSG00000013663:mmu-miR-19a-3p,ENSMUSG00000013663:mmu-miR-144-3p,ENSMUSG00000025746:mmu-let-7i-5p,ENSMUSG00000025746:mmu-miR-142a-3p,ENSMUSG00000032035:mmu-miR-1a-3p,ENSMUSG00000015709:mmu-miR-451a,ENSMUSG00000027715:mmu-miR-1b-5p,ENSMUSG00000003452:mmu-miR-16-5p,ENSMUSG00000022346:mmu-miR-451a,ENSMUSG00000061665:mmu-miR-142a-3…
Biological Process	GO:0031344	regulation of cell projection organization	34	1193	1.27362e-06	2.19395e-05	ENSMUSG00000061665:mmu-miR-142a-3p,ENSMUSG00000059974:mmu-miR-1903,ENSMUSG00000032913:mmu-miR-144-3p,ENSMUSG00000027273:mmu-miR-19a-3p,ENSMUSG00000003452:mmu-miR-16-5p,ENSMUSG00000025746:mmu-let-7i-5p,ENSMUSG00000025746:mmu-miR-142a-3p,ENSMUSG00000013663:mmu-miR-19a-3p,ENSMUSG00000013663:mmu-miR-19a-3p,ENSMUSG00000013663:mmu-miR-144-3p,ENSMUSG00000015605:mmu-miR-1a-3p,ENSMUSG00000068327:mmu-miR-1…
Biological Process	GO:0045598	regulation of fat cell differentiation	11	149	1.29496e-06	2.22588e-05	ENSMUSG00000020593:mmu-miR-1903,ENSMUSG00000027490:mmu-miR-1b-5p,ENSMUSG00000022306:mmu-miR-19a-3p,ENSMUSG00000022528:mmu-miR-1a-3p,ENSMUSG00000009900:mmu-miR-16-5p,ENSMUSG00000030201:mmu-miR-19a-3p,ENSMUSG00000020053:mmu-miR-1a-3p,ENSMUSG00000055116:mmu-miR-142a-3p,ENSMUSG00000023951:mmu-miR-16-5p,ENSMUSG00000023951:mmu-miR-126a-3p,ENSMUSG00000034957:mmu-miR-144-3p,ENSMUSG00000027276:mmu-miR-16-…
Biological Process	GO:0045667	regulation of osteoblast differentiation	12	181	1.34366e-06	2.30458e-05	ENSMUSG00000037225:mmu-miR-16-5p,ENSMUSG00000052155:mmu-miR-1b-5p,ENSMUSG00000027276:mmu-miR-16-5p,ENSMUSG00000020053:mmu-miR-1a-3p,ENSMUSG00000050953:mmu-miR-1a-3p,ENSMUSG00000038193:mmu-miR-1a-3p,ENSMUSG00000023951:mmu-miR-16-5p,ENSMUSG00000023951:mmu-miR-126a-3p,ENSMUSG00000034957:mmu-miR-144-3p,ENSMUSG00000040289:mmu-miR-451a,ENSMUSG00000024401:mmu-miR-19a-3p,ENSMUSG00000026313:mmu-miR-1a-3p,…
Biological Process	GO:0016337	single organismal cell-cell adhesion	31	1034	1.35239e-06	2.31455e-05	ENSMUSG00000009073:mmu-let-7i-5p,ENSMUSG00000005958:mmu-miR-1b-5p,ENSMUSG00000015605:mmu-miR-1a-3p,ENSMUSG00000030201:mmu-miR-19a-3p,ENSMUSG00000021756:mmu-miR-142a-3p,ENSMUSG00000061665:mmu-miR-142a-3p,ENSMUSG00000020053:mmu-miR-1a-3p,ENSMUSG00000029816:mmu-miR-1903,ENSMUSG00000027087:mmu-miR-16-5p,ENSMUSG00000031555:mmu-miR-126a-3p,ENSMUSG00000025746:mmu-let-7i-5p,ENSMUSG00000025746:mmu-miR-142…
Biological Process	GO:0023061	signal release	25	727	1.35598e-06	2.31568e-05	ENSMUSG00000073834:mmu-miR-1a-3p,ENSMUSG00000073834:mmu-let-7i-5p,ENSMUSG00000021109:mmu-miR-144-3p,ENSMUSG00000049791:mmu-miR-19a-3p,ENSMUSG00000024401:mmu-miR-19a-3p,ENSMUSG00000096688:mmu-miR-1a-3p,ENSMUSG00000096688:mmu-let-7i-5p,ENSMUSG00000027712:mmu-miR-1a-3p,ENSMUSG00000073830:mmu-miR-1a-3p,ENSMUSG00000033685:mmu-miR-1a-3p,ENSMUSG00000024563:mmu-miR-140-3p,ENSMUSG00000078680:mmu-miR-1a-3p…
Biological Process	GO:1903522	regulation of blood circulation	16	326	1.3789e-06	2.34977e-05	ENSMUSG00000036438:mmu-miR-1a-3p,ENSMUSG00000021944:mmu-miR-1a-3p,ENSMUSG00000030557:mmu-miR-1a-3p,ENSMUSG00000052821:mmu-miR-1b-5p,ENSMUSG00000001175:mmu-miR-1a-3p,ENSMUSG00000040752:mmu-miR-1a-3p,ENSMUSG00000000001:mmu-miR-451a,ENSMUSG00000030525:mmu-miR-19a-3p,ENSMUSG00000050953:mmu-miR-1a-3p,ENSMUSG00000021109:mmu-miR-144-3p,ENSMUSG00000054387:mmu-miR-16-5p,ENSMUSG00000057123:mmu-miR-144-3p,E…
Biological Process	GO:0019216	regulation of lipid metabolic process	21	539	1.39267e-06	2.36597e-05	ENSMUSG00000050697:mmu-miR-144-3p,ENSMUSG00000050697:mmu-miR-451a,ENSMUSG00000073834:mmu-miR-1a-3p,ENSMUSG00000073834:mmu-let-7i-5p,ENSMUSG00000031834:mmu-miR-126a-3p,ENSMUSG00000096688:mmu-miR-1a-3p,ENSMUSG00000096688:mmu-let-7i-5p,ENSMUSG00000031483:mmu-miR-16-5p,ENSMUSG00000024401:mmu-miR-19a-3p,ENSMUSG00000073830:mmu-miR-1a-3p,ENSMUSG00000006699:mmu-miR-1a-3p,ENSMUSG00000005533:mmu-miR-1a-3p,…
Biological Process	GO:0061179	negative regulation of insulin secretion involved in cellular response to glucose stimulus	8	70	1.39438e-06	2.36597e-05	ENSMUSG00000078680:mmu-miR-1a-3p,ENSMUSG00000033685:mmu-miR-1a-3p,ENSMUSG00000073830:mmu-miR-1a-3p,ENSMUSG00000096688:mmu-miR-1a-3p,ENSMUSG00000096688:mmu-let-7i-5p,ENSMUSG00000094793:mmu-miR-1a-3p,ENSMUSG00000073834:mmu-miR-1a-3p,ENSMUSG00000073834:mmu-let-7i-5p,ENSMUSG00000078673:mmu-miR-1a-3p,ENSMUSG00000030557:mmu-miR-1a-3p
Cellular Component	GO:0005623	cell	369	29122	1.51431e-06	2.56397e-05	ENSMUSG00000019647:mmu-miR-142a-3p,ENSMUSG00000040943:mmu-miR-19a-3p,ENSMUSG00000022861:mmu-miR-1903,ENSMUSG00000032413:mmu-miR-1b-5p,ENSMUSG00000033658:mmu-miR-16-5p,ENSMUSG00000033658:mmu-miR-451a,ENSMUSG00000026932:mmu-miR-1b-5p,ENSMUSG00000078619:mmu-miR-1a-3p,ENSMUSG00000006678:mmu-miR-1a-3p,ENSMUSG00000030465:mmu-miR-1b-5p,ENSMUSG00000028245:mmu-miR-451a,ENSMUSG00000034957:mmu-miR-144-3p,EN…
Biological Process	GO:0001704	formation of primary germ layer	11	152	1.57593e-06	2.66261e-05	ENSMUSG00000009073:mmu-let-7i-5p,ENSMUSG00000028717:mmu-miR-126a-3p,ENSMUSG00000015605:mmu-miR-1a-3p,ENSMUSG00000021944:mmu-miR-1a-3p,ENSMUSG00000009900:mmu-miR-16-5p,ENSMUSG00000068327:mmu-miR-1a-3p,ENSMUSG00000027087:mmu-miR-16-5p,ENSMUSG00000041075:mmu-miR-1a-3p,ENSMUSG00000041075:mmu-miR-126a-3p,ENSMUSG00000024563:mmu-miR-140-3p,ENSMUSG00000026193:mmu-miR-1a-3p,ENSMUSG00000026193:mmu-miR-140-…
Biological Process	GO:0030073	insulin secretion	17	370	1.59526e-06	2.68383e-05	ENSMUSG00000021109:mmu-miR-144-3p,ENSMUSG00000073834:mmu-miR-1a-3p,ENSMUSG00000073834:mmu-let-7i-5p,ENSMUSG00000096688:mmu-miR-1a-3p,ENSMUSG00000096688:mmu-let-7i-5p,ENSMUSG00000024401:mmu-miR-19a-3p,ENSMUSG00000033685:mmu-miR-1a-3p,ENSMUSG00000073830:mmu-miR-1a-3p,ENSMUSG00000024563:mmu-miR-140-3p,ENSMUSG00000050953:mmu-miR-1a-3p,ENSMUSG00000078680:mmu-miR-1a-3p,ENSMUSG00000078673:mmu-miR-1a-3p,…
Biological Process	GO:0036119	response to platelet-derived growth factor	7	50	1.5945e-06	2.68383e-05	ENSMUSG00000027715:mmu-miR-1b-5p,ENSMUSG00000033792:mmu-miR-1b-5p,ENSMUSG00000026193:mmu-miR-1a-3p,ENSMUSG00000026193:mmu-miR-140-3p,ENSMUSG00000021549:mmu-miR-1a-3p,ENSMUSG00000050953:mmu-miR-1a-3p,ENSMUSG00000028967:mmu-miR-126a-3p,ENSMUSG00000022346:mmu-miR-451a
Biological Process	GO:0033273	response to vitamin	13	218	1.61213e-06	2.70646e-05	ENSMUSG00000020364:mmu-miR-1b-5p,ENSMUSG00000017652:mmu-miR-16-5p,ENSMUSG00000005533:mmu-miR-1a-3p,ENSMUSG00000030201:mmu-miR-19a-3p,ENSMUSG00000002068:mmu-miR-16-5p,ENSMUSG00000021944:mmu-miR-1a-3p,ENSMUSG00000048482:mmu-miR-1a-3p,ENSMUSG00000023951:mmu-miR-16-5p,ENSMUSG00000023951:mmu-miR-126a-3p,ENSMUSG00000034957:mmu-miR-144-3p,ENSMUSG00000033307:mmu-miR-451a,ENSMUSG00000004099:mmu-miR-126a-3…
Biological Process	GO:0043170	macromolecule metabolic process	252	17876	1.62636e-06	2.72457e-05	ENSMUSG00000078866:mmu-miR-25-3p,ENSMUSG00000020272:mmu-miR-25-3p,ENSMUSG00000027784:mmu-miR-451a,ENSMUSG00000009555:mmu-miR-1a-3p,ENSMUSG00000030156:mmu-miR-25-3p,ENSMUSG00000009900:mmu-miR-16-5p,ENSMUSG00000031433:mmu-miR-1b-5p,ENSMUSG00000035762:mmu-miR-1b-5p,ENSMUSG00000078680:mmu-miR-1a-3p,ENSMUSG00000030525:mmu-miR-19a-3p,ENSMUSG00000040242:mmu-miR-19a-3p,ENSMUSG00000028086:mmu-miR-25-3p,EN…
Biological Process	GO:0045778	positive regulation of ossification	10	123	1.63982e-06	2.74134e-05	ENSMUSG00000021756:mmu-miR-142a-3p,ENSMUSG00000030201:mmu-miR-19a-3p,ENSMUSG00000040289:mmu-miR-451a,ENSMUSG00000023951:mmu-miR-16-5p,ENSMUSG00000023951:mmu-miR-126a-3p,ENSMUSG00000034957:mmu-miR-144-3p,ENSMUSG00000050953:mmu-miR-1a-3p,ENSMUSG00000020053:mmu-miR-1a-3p,ENSMUSG00000027276:mmu-miR-16-5p,ENSMUSG00000052155:mmu-miR-1b-5p,ENSMUSG00000037225:mmu-miR-16-5p
Cellular Component	GO:0005887	integral component of plasma membrane	47	1965	1.66156e-06	2.77184e-05	ENSMUSG00000027164:mmu-miR-144-3p,ENSMUSG00000037541:mmu-miR-451a,ENSMUSG00000024401:mmu-miR-19a-3p,ENSMUSG00000019838:mmu-miR-1b-5p,ENSMUSG00000074743:mmu-miR-451a,ENSMUSG00000022967:mmu-let-7i-5p,ENSMUSG00000032243:mmu-miR-126a-3p,ENSMUSG00000054537:mmu-miR-1903,ENSMUSG00000049336:mmu-miR-451a,ENSMUSG00000030525:mmu-miR-19a-3p,ENSMUSG00000027716:mmu-miR-451a,ENSMUSG00000032076:mmu-miR-16-5p,ENS…
Biological Process	GO:0002237	response to molecule of bacterial origin	24	687	1.68433e-06	2.80373e-05	ENSMUSG00000027164:mmu-miR-144-3p,ENSMUSG00000039005:mmu-miR-1b-5p,ENSMUSG00000031392:mmu-miR-142a-3p,ENSMUSG00000025980:mmu-miR-1a-3p,ENSMUSG00000017652:mmu-miR-16-5p,ENSMUSG00000024401:mmu-miR-19a-3p,ENSMUSG00000022967:mmu-let-7i-5p,ENSMUSG00000074743:mmu-miR-451a,ENSMUSG00000066551:mmu-miR-142a-3p,ENSMUSG00000021109:mmu-miR-144-3p,ENSMUSG00000025586:mmu-miR-1a-3p,ENSMUSG00000025586:mmu-miR-25-…
Biological Process	GO:0040007	growth	45	1845	1.68776e-06	2.80373e-05	ENSMUSG00000020542:mmu-miR-1a-3p,ENSMUSG00000021109:mmu-miR-144-3p,ENSMUSG00000022306:mmu-miR-19a-3p,ENSMUSG00000020838:mmu-miR-16-5p,ENSMUSG00000028736:mmu-miR-1a-3p,ENSMUSG00000024921:mmu-miR-142a-3p,ENSMUSG00000026193:mmu-miR-1a-3p,ENSMUSG00000026193:mmu-miR-140-3p,ENSMUSG00000040752:mmu-miR-1a-3p,ENSMUSG00000037225:mmu-miR-16-5p,ENSMUSG00000023951:mmu-miR-16-5p,ENSMUSG00000023951:mmu-miR-126a…
Biological Process	GO:0051052	regulation of DNA metabolic process	26	786	1.69831e-06	2.81536e-05	ENSMUSG00000009073:mmu-let-7i-5p,ENSMUSG00000014074:mmu-miR-16-5p,ENSMUSG00000054272:mmu-miR-1b-5p,ENSMUSG00000027665:mmu-miR-1b-5p,ENSMUSG00000055204:mmu-miR-451a,ENSMUSG00000020053:mmu-miR-1a-3p,ENSMUSG00000002111:mmu-miR-126a-3p,ENSMUSG00000022346:mmu-miR-451a,ENSMUSG00000090714:mmu-miR-1b-5p,ENSMUSG00000052684:mmu-miR-16-5p,ENSMUSG00000027715:mmu-miR-1b-5p,ENSMUSG00000025746:mmu-let-7i-5p,ENS…
Cellular Component	GO:0005622	intracellular	330	25145	1.75719e-06	2.90688e-05	ENSMUSG00000054611:mmu-miR-19a-3p,ENSMUSG00000023951:mmu-miR-16-5p,ENSMUSG00000023951:mmu-miR-126a-3p,ENSMUSG00000036533:mmu-miR-144-3p,ENSMUSG00000024259:mmu-miR-1b-5p,ENSMUSG00000029787:mmu-miR-451a,ENSMUSG00000025324:mmu-miR-19a-3p,ENSMUSG00000026482:mmu-miR-1b-5p,ENSMUSG00000048285:mmu-miR-1b-5p,ENSMUSG00000060314:mmu-miR-1b-5p,ENSMUSG00000026313:mmu-miR-1a-3p,ENSMUSG00000055116:mmu-miR-142a-…
Biological Process	GO:0003231	cardiac ventricle development	12	187	1.89184e-06	3.12311e-05	ENSMUSG00000038193:mmu-miR-1a-3p,ENSMUSG00000040752:mmu-miR-1a-3p,ENSMUSG00000027276:mmu-miR-16-5p,ENSMUSG00000022306:mmu-miR-19a-3p,ENSMUSG00000057123:mmu-miR-144-3p,ENSMUSG00000054387:mmu-miR-16-5p,ENSMUSG00000040289:mmu-miR-451a,ENSMUSG00000022528:mmu-miR-1a-3p,ENSMUSG00000021944:mmu-miR-1a-3p,ENSMUSG00000021109:mmu-miR-144-3p,ENSMUSG00000030201:mmu-miR-19a-3p,ENSMUSG00000020542:mmu-miR-1a-3p
Biological Process	GO:0044249	cellular biosynthetic process	192	12761	1.89616e-06	3.12374e-05	ENSMUSG00000047888:mmu-miR-1b-5p,ENSMUSG00000036144:mmu-miR-1a-3p,ENSMUSG00000015605:mmu-miR-1a-3p,ENSMUSG00000030201:mmu-miR-19a-3p,ENSMUSG00000068327:mmu-miR-1a-3p,ENSMUSG00000055116:mmu-miR-142a-3p,ENSMUSG00000046020:mmu-miR-1b-5p,ENSMUSG00000038193:mmu-miR-1a-3p,ENSMUSG00000003452:mmu-miR-16-5p,ENSMUSG00000026313:mmu-miR-1a-3p,ENSMUSG00000096688:mmu-miR-1a-3p,ENSMUSG00000096688:mmu-let-7i-5p,…
Biological Process	GO:0030278	regulation of ossification	15	295	1.90499e-06	3.13177e-05	ENSMUSG00000040289:mmu-miR-451a,ENSMUSG00000021109:mmu-miR-144-3p,ENSMUSG00000026313:mmu-miR-1a-3p,ENSMUSG00000024401:mmu-miR-19a-3p,ENSMUSG00000030201:mmu-miR-19a-3p,ENSMUSG00000021756:mmu-miR-142a-3p,ENSMUSG00000037225:mmu-miR-16-5p,ENSMUSG00000052155:mmu-miR-1b-5p,ENSMUSG00000057329:mmu-miR-16-5p,ENSMUSG00000027276:mmu-miR-16-5p,ENSMUSG00000050953:mmu-miR-1a-3p,ENSMUSG00000020053:mmu-miR-1a-3p…
Biological Process	GO:1902532	negative regulation of intracellular signal transduction	25	742	1.9485e-06	3.19667e-05	ENSMUSG00000039661:mmu-miR-1903,ENSMUSG00000027351:mmu-miR-144-3p,ENSMUSG00000027351:mmu-miR-126a-3p,ENSMUSG00000026029:mmu-miR-1b-5p,ENSMUSG00000033307:mmu-miR-451a,ENSMUSG00000021109:mmu-miR-144-3p,ENSMUSG00000050697:mmu-miR-144-3p,ENSMUSG00000050697:mmu-miR-451a,ENSMUSG00000038696:mmu-miR-16-5p,ENSMUSG00000090935:mmu-miR-1903,ENSMUSG00000039005:mmu-miR-1b-5p,ENSMUSG00000090877:mmu-miR-1a-3p,EN…
Biological Process	GO:1903034	regulation of response to wounding	14	258	1.96568e-06	3.2182e-05	ENSMUSG00000033792:mmu-miR-1b-5p,ENSMUSG00000028517:mmu-miR-16-5p,ENSMUSG00000074743:mmu-miR-451a,ENSMUSG00000027712:mmu-miR-1a-3p,ENSMUSG00000066551:mmu-miR-142a-3p,ENSMUSG00000005533:mmu-miR-1a-3p,ENSMUSG00000039005:mmu-miR-1b-5p,ENSMUSG00000013663:mmu-miR-19a-3p,ENSMUSG00000013663:mmu-miR-19a-3p,ENSMUSG00000013663:mmu-miR-144-3p,ENSMUSG00000003032:mmu-miR-1a-3p,ENSMUSG00000037225:mmu-miR-16-5p…
Biological Process	GO:0070371	ERK1 and ERK2 cascade	22	598	1.99604e-06	3.26117e-05	ENSMUSG00000033307:mmu-miR-451a,ENSMUSG00000028086:mmu-miR-25-3p,ENSMUSG00000023951:mmu-miR-16-5p,ENSMUSG00000023951:mmu-miR-126a-3p,ENSMUSG00000026193:mmu-miR-1a-3p,ENSMUSG00000026193:mmu-miR-140-3p,ENSMUSG00000039661:mmu-miR-1903,ENSMUSG00000037225:mmu-miR-16-5p,ENSMUSG00000039005:mmu-miR-1b-5p,ENSMUSG00000090935:mmu-miR-1903,ENSMUSG00000027654:mmu-miR-19a-3p,ENSMUSG00000066551:mmu-miR-142a-3p,…
Biological Process	GO:0045596	negative regulation of cell differentiation	37	1387	2.01131e-06	3.27934e-05	ENSMUSG00000013663:mmu-miR-19a-3p,ENSMUSG00000013663:mmu-miR-19a-3p,ENSMUSG00000013663:mmu-miR-144-3p,ENSMUSG00000038227:mmu-miR-126a-3p,ENSMUSG00000022892:mmu-miR-16-5p,ENSMUSG00000040289:mmu-miR-451a,ENSMUSG00000068327:mmu-miR-1a-3p,ENSMUSG00000030201:mmu-miR-19a-3p,ENSMUSG00000017491:mmu-miR-1a-3p,ENSMUSG00000055116:mmu-miR-142a-3p,ENSMUSG00000059974:mmu-miR-1903,ENSMUSG00000061665:mmu-miR-142…
Biological Process	GO:0043434	response to peptide hormone	26	795	2.08856e-06	3.39831e-05	ENSMUSG00000026193:mmu-miR-1a-3p,ENSMUSG00000026193:mmu-miR-140-3p,ENSMUSG00000033307:mmu-miR-451a,ENSMUSG00000025586:mmu-miR-1a-3p,ENSMUSG00000025586:mmu-miR-25-3p,ENSMUSG00000026434:mmu-miR-451a,ENSMUSG00000050953:mmu-miR-1a-3p,ENSMUSG00000027712:mmu-miR-1a-3p,ENSMUSG00000031834:mmu-miR-126a-3p,ENSMUSG00000021109:mmu-miR-144-3p,ENSMUSG00000050697:mmu-miR-144-3p,ENSMUSG00000050697:mmu-miR-451a,E…
Biological Process	GO:0060411	cardiac septum morphogenesis	8	74	2.13921e-06	3.47359e-05	ENSMUSG00000022306:mmu-miR-19a-3p,ENSMUSG00000021944:mmu-miR-1a-3p,ENSMUSG00000022528:mmu-miR-1a-3p,ENSMUSG00000040289:mmu-miR-451a,ENSMUSG00000057123:mmu-miR-144-3p,ENSMUSG00000017491:mmu-miR-1a-3p,ENSMUSG00000030201:mmu-miR-19a-3p,ENSMUSG00000027276:mmu-miR-16-5p
Biological Process	GO:0042063	gliogenesis	19	464	2.15634e-06	3.49424e-05	ENSMUSG00000022346:mmu-miR-451a,ENSMUSG00000002881:mmu-miR-1903,ENSMUSG00000020053:mmu-miR-1a-3p,ENSMUSG00000057329:mmu-miR-16-5p,ENSMUSG00000004872:mmu-miR-1a-3p,ENSMUSG00000009073:mmu-let-7i-5p,ENSMUSG00000013663:mmu-miR-19a-3p,ENSMUSG00000013663:mmu-miR-19a-3p,ENSMUSG00000013663:mmu-miR-144-3p,ENSMUSG00000030201:mmu-miR-19a-3p,ENSMUSG00000046876:mmu-miR-19a-3p,ENSMUSG00000003282:mmu-miR-1b-5p,…
Biological Process	GO:0060070	canonical Wnt signaling pathway	18	421	2.18769e-06	3.5378e-05	ENSMUSG00000068457:mmu-miR-1b-5p,ENSMUSG00000030223:mmu-miR-1903,ENSMUSG00000070348:mmu-miR-16-5p,ENSMUSG00000040752:mmu-miR-1a-3p,ENSMUSG00000037225:mmu-miR-16-5p,ENSMUSG00000006699:mmu-miR-1a-3p,ENSMUSG00000028517:mmu-miR-16-5p,ENSMUSG00000049791:mmu-miR-19a-3p,ENSMUSG00000009900:mmu-miR-16-5p,ENSMUSG00000022346:mmu-miR-451a,ENSMUSG00000041075:mmu-miR-1a-3p,ENSMUSG00000041075:mmu-miR-126a-3p,EN…
Biological Process	GO:0010038	response to metal ion	25	748	2.24587e-06	3.6245e-05	ENSMUSG00000001175:mmu-miR-1a-3p,ENSMUSG00000048482:mmu-miR-1a-3p,ENSMUSG00000030557:mmu-miR-1a-3p,ENSMUSG00000033658:mmu-miR-16-5p,ENSMUSG00000033658:mmu-miR-451a,ENSMUSG00000022892:mmu-miR-16-5p,ENSMUSG00000062908:mmu-miR-19a-3p,ENSMUSG00000013663:mmu-miR-19a-3p,ENSMUSG00000013663:mmu-miR-19a-3p,ENSMUSG00000013663:mmu-miR-144-3p,ENSMUSG00000057329:mmu-miR-16-5p,ENSMUSG00000028890:mmu-miR-1b-5p,…
Biological Process	GO:0007423	sensory organ development	29	955	2.33012e-06	3.74973e-05	ENSMUSG00000020053:mmu-miR-1a-3p,ENSMUSG00000038193:mmu-miR-1a-3p,ENSMUSG00000022346:mmu-miR-451a,ENSMUSG00000034957:mmu-miR-144-3p,ENSMUSG00000027715:mmu-miR-1b-5p,ENSMUSG00000052684:mmu-miR-16-5p,ENSMUSG00000057329:mmu-miR-16-5p,ENSMUSG00000027276:mmu-miR-16-5p,ENSMUSG00000003032:mmu-miR-1a-3p,ENSMUSG00000027210:mmu-let-7i-5p,ENSMUSG00000009073:mmu-let-7i-5p,ENSMUSG00000040289:mmu-miR-451a,ENSM…
Biological Process	GO:0044271	cellular nitrogen compound biosynthetic process	170	10994	2.33684e-06	3.74973e-05	ENSMUSG00000033014:mmu-miR-451a,ENSMUSG00000022505:mmu-miR-1903,ENSMUSG00000014074:mmu-miR-16-5p,ENSMUSG00000022892:mmu-miR-16-5p,ENSMUSG00000038227:mmu-miR-126a-3p,ENSMUSG00000034673:mmu-miR-1903,ENSMUSG00000000693:mmu-miR-1b-5p,ENSMUSG00000022346:mmu-miR-451a,ENSMUSG00000002748:mmu-miR-1903,ENSMUSG00000031483:mmu-miR-16-5p,ENSMUSG00000031834:mmu-miR-126a-3p,ENSMUSG00000042292:mmu-miR-1a-3p,ENSM…
Biological Process	GO:0060541	respiratory system development	18	423	2.33766e-06	3.74973e-05	ENSMUSG00000028967:mmu-miR-126a-3p,ENSMUSG00000021944:mmu-miR-1a-3p,ENSMUSG00000015605:mmu-miR-1a-3p,ENSMUSG00000046876:mmu-miR-19a-3p,ENSMUSG00000030201:mmu-miR-19a-3p,ENSMUSG00000020053:mmu-miR-1a-3p,ENSMUSG00000034957:mmu-miR-144-3p,ENSMUSG00000006699:mmu-miR-1a-3p,ENSMUSG00000022306:mmu-miR-19a-3p,ENSMUSG00000066551:mmu-miR-142a-3p,ENSMUSG00000022528:mmu-miR-1a-3p,ENSMUSG00000024401:mmu-miR-1…
Biological Process	GO:0002065	columnar/cuboidal epithelial cell differentiation	12	191	2.35917e-06	3.77659e-05	ENSMUSG00000017491:mmu-miR-1a-3p,ENSMUSG00000040289:mmu-miR-451a,ENSMUSG00000030302:mmu-let-7i-5p,ENSMUSG00000022528:mmu-miR-1a-3p,ENSMUSG00000021944:mmu-miR-1a-3p,ENSMUSG00000021109:mmu-miR-144-3p,ENSMUSG00000034908:mmu-miR-451a,ENSMUSG00000027276:mmu-miR-16-5p,ENSMUSG00000037225:mmu-miR-16-5p,ENSMUSG00000028945:mmu-miR-1a-3p,ENSMUSG00000054611:mmu-miR-19a-3p,ENSMUSG00000055116:mmu-miR-142a-3p
Biological Process	GO:0031649	heat generation	7	53	2.38914e-06	3.81684e-05	ENSMUSG00000024401:mmu-miR-19a-3p,ENSMUSG00000094793:mmu-miR-1a-3p,ENSMUSG00000096688:mmu-miR-1a-3p,ENSMUSG00000096688:mmu-let-7i-5p,ENSMUSG00000073834:mmu-miR-1a-3p,ENSMUSG00000073834:mmu-let-7i-5p,ENSMUSG00000078673:mmu-miR-1a-3p,ENSMUSG00000078680:mmu-miR-1a-3p,ENSMUSG00000073830:mmu-miR-1a-3p
Biological Process	GO:0090130	tissue migration	19	468	2.44282e-06	3.89475e-05	ENSMUSG00000015605:mmu-miR-1a-3p,ENSMUSG00000036144:mmu-miR-1a-3p,ENSMUSG00000022505:mmu-miR-1903,ENSMUSG00000013663:mmu-miR-19a-3p,ENSMUSG00000013663:mmu-miR-19a-3p,ENSMUSG00000013663:mmu-miR-144-3p,ENSMUSG00000032035:mmu-miR-1a-3p,ENSMUSG00000003032:mmu-miR-1a-3p,ENSMUSG00000052684:mmu-miR-16-5p,ENSMUSG00000031555:mmu-miR-126a-3p,ENSMUSG00000021256:mmu-miR-1903,ENSMUSG00000027087:mmu-miR-16-5p,…
Biological Process	GO:0045834	positive regulation of lipid metabolic process	14	263	2.45961e-06	3.91364e-05	ENSMUSG00000078680:mmu-miR-1a-3p,ENSMUSG00000020053:mmu-miR-1a-3p,ENSMUSG00000037225:mmu-miR-16-5p,ENSMUSG00000055980:mmu-miR-126a-3p,ENSMUSG00000029104:mmu-miR-1b-5p,ENSMUSG00000005533:mmu-miR-1a-3p,ENSMUSG00000006699:mmu-miR-1a-3p,ENSMUSG00000073830:mmu-miR-1a-3p,ENSMUSG00000078673:mmu-miR-1a-3p,ENSMUSG00000073834:mmu-miR-1a-3p,ENSMUSG00000073834:mmu-let-7i-5p,ENSMUSG00000050697:mmu-miR-144-3p,…
Biological Process	GO:0019915	lipid storage	12	192	2.49084e-06	3.9554e-05	ENSMUSG00000027087:mmu-miR-16-5p,ENSMUSG00000028086:mmu-miR-25-3p,ENSMUSG00000078680:mmu-miR-1a-3p,ENSMUSG00000061665:mmu-miR-142a-3p,ENSMUSG00000000594:mmu-miR-451a,ENSMUSG00000003452:mmu-miR-16-5p,ENSMUSG00000073830:mmu-miR-1a-3p,ENSMUSG00000024401:mmu-miR-19a-3p,ENSMUSG00000094793:mmu-miR-1a-3p,ENSMUSG00000096688:mmu-miR-1a-3p,ENSMUSG00000096688:mmu-let-7i-5p,ENSMUSG00000078673:mmu-miR-1a-3p,E…
Biological Process	GO:0002792	negative regulation of peptide secretion	13	227	2.52384e-06	3.98385e-05	ENSMUSG00000073830:mmu-miR-1a-3p,ENSMUSG00000033685:mmu-miR-1a-3p,ENSMUSG00000078673:mmu-miR-1a-3p,ENSMUSG00000073834:mmu-miR-1a-3p,ENSMUSG00000073834:mmu-let-7i-5p,ENSMUSG00000030557:mmu-miR-1a-3p,ENSMUSG00000094793:mmu-miR-1a-3p,ENSMUSG00000096688:mmu-miR-1a-3p,ENSMUSG00000096688:mmu-let-7i-5p,ENSMUSG00000027712:mmu-miR-1a-3p,ENSMUSG00000024401:mmu-miR-19a-3p,ENSMUSG00000078680:mmu-miR-1a-3p,EN…
Biological Process	GO:0048659	smooth muscle cell proliferation	13	227	2.52384e-06	3.98385e-05	ENSMUSG00000020053:mmu-miR-1a-3p,ENSMUSG00000022346:mmu-miR-451a,ENSMUSG00000023951:mmu-miR-16-5p,ENSMUSG00000023951:mmu-miR-126a-3p,ENSMUSG00000037225:mmu-miR-16-5p,ENSMUSG00000052684:mmu-miR-16-5p,ENSMUSG00000025746:mmu-let-7i-5p,ENSMUSG00000025746:mmu-miR-142a-3p,ENSMUSG00000003032:mmu-miR-1a-3p,ENSMUSG00000005533:mmu-miR-1a-3p,ENSMUSG00000031392:mmu-miR-142a-3p,ENSMUSG00000027164:mmu-miR-144-…
Cellular Component	GO:0042995	cell projection	71	3554	2.52036e-06	3.98385e-05	ENSMUSG00000036438:mmu-miR-1a-3p,ENSMUSG00000016664:mmu-miR-16-5p,ENSMUSG00000022788:mmu-miR-16-5p,ENSMUSG00000017466:mmu-miR-19a-3p,ENSMUSG00000019775:mmu-miR-1903,ENSMUSG00000060534:mmu-miR-1903,ENSMUSG00000021549:mmu-miR-1a-3p,ENSMUSG00000030525:mmu-miR-19a-3p,ENSMUSG00000030223:mmu-miR-1903,ENSMUSG00000030744:mmu-miR-1b-5p,ENSMUSG00000032076:mmu-miR-16-5p,ENSMUSG00000006699:mmu-miR-1a-3p,ENSM…
Biological Process	GO:0007519	skeletal muscle tissue development	17	385	2.72329e-06	4.28163e-05	ENSMUSG00000027852:mmu-miR-1b-5p,ENSMUSG00000036144:mmu-miR-1a-3p,ENSMUSG00000021944:mmu-miR-1a-3p,ENSMUSG00000026251:mmu-miR-19a-3p,ENSMUSG00000022346:mmu-miR-451a,ENSMUSG00000055116:mmu-miR-142a-3p,ENSMUSG00000006678:mmu-miR-1a-3p,ENSMUSG00000057329:mmu-miR-16-5p,ENSMUSG00000004872:mmu-miR-1a-3p,ENSMUSG00000020423:mmu-miR-25-3p,ENSMUSG00000026313:mmu-miR-1a-3p,ENSMUSG00000020542:mmu-miR-1a-3p,E…
Biological Process	GO:0030324	lung development	17	385	2.72329e-06	4.28163e-05	ENSMUSG00000034957:mmu-miR-144-3p,ENSMUSG00000020053:mmu-miR-1a-3p,ENSMUSG00000046876:mmu-miR-19a-3p,ENSMUSG00000021944:mmu-miR-1a-3p,ENSMUSG00000015605:mmu-miR-1a-3p,ENSMUSG00000028967:mmu-miR-126a-3p,ENSMUSG00000024563:mmu-miR-140-3p,ENSMUSG00000037225:mmu-miR-16-5p,ENSMUSG00000023951:mmu-miR-16-5p,ENSMUSG00000023951:mmu-miR-126a-3p,ENSMUSG00000028086:mmu-miR-25-3p,ENSMUSG00000020542:mmu-miR-1a…
Biological Process	GO:0080134	regulation of response to stress	49	2129	2.86472e-06	4.49506e-05	ENSMUSG00000026012:mmu-miR-1b-5p,ENSMUSG00000003032:mmu-miR-1a-3p,ENSMUSG00000026932:mmu-miR-1b-5p,ENSMUSG00000022788:mmu-miR-16-5p,ENSMUSG00000021256:mmu-miR-1903,ENSMUSG00000027852:mmu-miR-1b-5p,ENSMUSG00000055204:mmu-miR-451a,ENSMUSG00000027951:mmu-miR-1a-3p,ENSMUSG00000028967:mmu-miR-126a-3p,ENSMUSG00000027716:mmu-miR-451a,ENSMUSG00000027351:mmu-miR-144-3p,ENSMUSG00000027351:mmu-miR-126a-3p,E…
Biological Process	GO:0000302	response to reactive oxygen species	22	612	2.89623e-06	4.52169e-05	ENSMUSG00000061665:mmu-miR-142a-3p,ENSMUSG00000048582:mmu-miR-19a-3p,ENSMUSG00000027087:mmu-miR-16-5p,ENSMUSG00000003452:mmu-miR-16-5p,ENSMUSG00000052684:mmu-miR-16-5p,ENSMUSG00000031555:mmu-miR-126a-3p,ENSMUSG00000027715:mmu-miR-1b-5p,ENSMUSG00000003032:mmu-miR-1a-3p,ENSMUSG00000032035:mmu-miR-1a-3p,ENSMUSG00000025746:mmu-let-7i-5p,ENSMUSG00000025746:mmu-miR-142a-3p,ENSMUSG00000057329:mmu-miR-16…
Biological Process	GO:0045785	positive regulation of cell adhesion	24	709	2.88952e-06	4.52169e-05	ENSMUSG00000023951:mmu-miR-16-5p,ENSMUSG00000023951:mmu-miR-126a-3p,ENSMUSG00000026193:mmu-miR-1a-3p,ENSMUSG00000026193:mmu-miR-140-3p,ENSMUSG00000024944:mmu-miR-16-5p,ENSMUSG00000039661:mmu-miR-1903,ENSMUSG00000038696:mmu-miR-16-5p,ENSMUSG00000027164:mmu-miR-144-3p,ENSMUSG00000006699:mmu-miR-1a-3p,ENSMUSG00000025980:mmu-miR-1a-3p,ENSMUSG00000024401:mmu-miR-19a-3p,ENSMUSG00000016496:mmu-miR-16-5p…
Biological Process	GO:0051145	smooth muscle cell differentiation	8	77	2.89881e-06	4.52169e-05	ENSMUSG00000024921:mmu-miR-142a-3p,ENSMUSG00000023951:mmu-miR-16-5p,ENSMUSG00000023951:mmu-miR-126a-3p,ENSMUSG00000040289:mmu-miR-451a,ENSMUSG00000055204:mmu-miR-451a,ENSMUSG00000042292:mmu-miR-1a-3p,ENSMUSG00000022528:mmu-miR-1a-3p,ENSMUSG00000015605:mmu-miR-1a-3p,ENSMUSG00000020542:mmu-miR-1a-3p
Biological Process	GO:0006109	regulation of carbohydrate metabolic process	16	347	3.08255e-06	4.78239e-05	ENSMUSG00000026313:mmu-miR-1a-3p,ENSMUSG00000096688:mmu-miR-1a-3p,ENSMUSG00000096688:mmu-let-7i-5p,ENSMUSG00000066551:mmu-miR-142a-3p,ENSMUSG00000073834:mmu-miR-1a-3p,ENSMUSG00000073834:mmu-let-7i-5p,ENSMUSG00000050697:mmu-miR-144-3p,ENSMUSG00000050697:mmu-miR-451a,ENSMUSG00000021109:mmu-miR-144-3p,ENSMUSG00000073830:mmu-miR-1a-3p,ENSMUSG00000033307:mmu-miR-451a,ENSMUSG00000078680:mmu-miR-1a-3p,E…
Biological Process	GO:0035239	tube morphogenesis	21	567	3.07349e-06	4.78239e-05	ENSMUSG00000030201:mmu-miR-19a-3p,ENSMUSG00000021944:mmu-miR-1a-3p,ENSMUSG00000015605:mmu-miR-1a-3p,ENSMUSG00000040289:mmu-miR-451a,ENSMUSG00000005958:mmu-miR-1b-5p,ENSMUSG00000022346:mmu-miR-451a,ENSMUSG00000038193:mmu-miR-1a-3p,ENSMUSG00000020053:mmu-miR-1a-3p,ENSMUSG00000057329:mmu-miR-16-5p,ENSMUSG00000004872:mmu-miR-1a-3p,ENSMUSG00000027164:mmu-miR-144-3p,ENSMUSG00000024401:mmu-miR-19a-3p,EN…
Biological Process	GO:0045599	negative regulation of fat cell differentiation	7	55	3.08405e-06	4.78239e-05	ENSMUSG00000022306:mmu-miR-19a-3p,ENSMUSG00000027490:mmu-miR-1b-5p,ENSMUSG00000023951:mmu-miR-16-5p,ENSMUSG00000023951:mmu-miR-126a-3p,ENSMUSG00000055116:mmu-miR-142a-3p,ENSMUSG00000027276:mmu-miR-16-5p,ENSMUSG00000030201:mmu-miR-19a-3p,ENSMUSG00000009900:mmu-miR-16-5p
Biological Process	GO:0032496	response to lipopolysaccharide	23	663	3.11285e-06	4.81762e-05	ENSMUSG00000025746:mmu-let-7i-5p,ENSMUSG00000025746:mmu-miR-142a-3p,ENSMUSG00000052684:mmu-miR-16-5p,ENSMUSG00000031555:mmu-miR-126a-3p,ENSMUSG00000020053:mmu-miR-1a-3p,ENSMUSG00000041515:mmu-miR-451a,ENSMUSG00000015243:mmu-miR-144-3p,ENSMUSG00000045362:mmu-let-7i-5p,ENSMUSG00000026193:mmu-miR-1a-3p,ENSMUSG00000026193:mmu-miR-140-3p,ENSMUSG00000026029:mmu-miR-1b-5p,ENSMUSG00000025586:mmu-miR-1a-3…
Biological Process	GO:0030323	respiratory tube development	17	389	3.12623e-06	4.8289e-05	ENSMUSG00000006699:mmu-miR-1a-3p,ENSMUSG00000022306:mmu-miR-19a-3p,ENSMUSG00000022528:mmu-miR-1a-3p,ENSMUSG00000066551:mmu-miR-142a-3p,ENSMUSG00000020542:mmu-miR-1a-3p,ENSMUSG00000033792:mmu-miR-1b-5p,ENSMUSG00000024401:mmu-miR-19a-3p,ENSMUSG00000023951:mmu-miR-16-5p,ENSMUSG00000023951:mmu-miR-126a-3p,ENSMUSG00000028086:mmu-miR-25-3p,ENSMUSG00000024563:mmu-miR-140-3p,ENSMUSG00000037225:mmu-miR-16…
Biological Process	GO:0048762	mesenchymal cell differentiation	14	269	3.19632e-06	4.92756e-05	ENSMUSG00000026193:mmu-miR-1a-3p,ENSMUSG00000026193:mmu-miR-140-3p,ENSMUSG00000057329:mmu-miR-16-5p,ENSMUSG00000027276:mmu-miR-16-5p,ENSMUSG00000004872:mmu-miR-1a-3p,ENSMUSG00000024563:mmu-miR-140-3p,ENSMUSG00000000693:mmu-miR-1b-5p,ENSMUSG00000038193:mmu-miR-1a-3p,ENSMUSG00000050953:mmu-miR-1a-3p,ENSMUSG00000030201:mmu-miR-19a-3p,ENSMUSG00000022528:mmu-miR-1a-3p,ENSMUSG00000021109:mmu-miR-144-3p…
Biological Process	GO:0050769	positive regulation of neurogenesis	28	919	3.27721e-06	5.04244e-05	ENSMUSG00000021756:mmu-miR-142a-3p,ENSMUSG00000046876:mmu-miR-19a-3p,ENSMUSG00000003282:mmu-miR-1b-5p,ENSMUSG00000017491:mmu-miR-1a-3p,ENSMUSG00000015605:mmu-miR-1a-3p,ENSMUSG00000019647:mmu-miR-142a-3p,ENSMUSG00000048482:mmu-miR-1a-3p,ENSMUSG00000060534:mmu-miR-1903,ENSMUSG00000017466:mmu-miR-19a-3p,ENSMUSG00000006678:mmu-miR-1a-3p,ENSMUSG00000057329:mmu-miR-16-5p,ENSMUSG00000025746:mmu-let-7i-5…
Biological Process	GO:0045833	negative regulation of lipid metabolic process	11	164	3.30759e-06	5.07934e-05	ENSMUSG00000073830:mmu-miR-1a-3p,ENSMUSG00000096688:mmu-miR-1a-3p,ENSMUSG00000096688:mmu-let-7i-5p,ENSMUSG00000094793:mmu-miR-1a-3p,ENSMUSG00000039958:mmu-miR-1b-5p,ENSMUSG00000031483:mmu-miR-16-5p,ENSMUSG00000024401:mmu-miR-19a-3p,ENSMUSG00000050697:mmu-miR-144-3p,ENSMUSG00000050697:mmu-miR-451a,ENSMUSG00000073834:mmu-miR-1a-3p,ENSMUSG00000073834:mmu-let-7i-5p,ENSMUSG00000078673:mmu-miR-1a-3p,EN…
Biological Process	GO:0043279	response to alkaloid	15	310	3.49498e-06	5.35672e-05	ENSMUSG00000022346:mmu-miR-451a,ENSMUSG00000026251:mmu-miR-19a-3p,ENSMUSG00000020053:mmu-miR-1a-3p,ENSMUSG00000030525:mmu-miR-19a-3p,ENSMUSG00000025746:mmu-let-7i-5p,ENSMUSG00000025746:mmu-miR-142a-3p,ENSMUSG00000057329:mmu-miR-16-5p,ENSMUSG00000027715:mmu-miR-1b-5p,ENSMUSG00000055980:mmu-miR-126a-3p,ENSMUSG00000032113:mmu-miR-1b-5p,ENSMUSG00000025980:mmu-miR-1a-3p,ENSMUSG00000039005:mmu-miR-1b-5…
Molecular Function	GO:0001076	transcription factor activity, RNA polymerase II transcription factor binding	13	234	3.52335e-06	5.38977e-05	ENSMUSG00000055116:mmu-miR-142a-3p,ENSMUSG00000027104:mmu-miR-1b-5p,ENSMUSG00000027104:mmu-miR-451a,ENSMUSG00000031930:mmu-miR-25-3p,ENSMUSG00000024921:mmu-miR-142a-3p,ENSMUSG00000003032:mmu-miR-1a-3p,ENSMUSG00000026932:mmu-miR-1b-5p,ENSMUSG00000022306:mmu-miR-19a-3p,ENSMUSG00000030557:mmu-miR-1a-3p,ENSMUSG00000015605:mmu-miR-1a-3p,ENSMUSG00000042292:mmu-miR-1a-3p,ENSMUSG00000021944:mmu-miR-1a-3p…
Biological Process	GO:0032147	activation of protein kinase activity	17	393	3.58208e-06	5.46905e-05	ENSMUSG00000023951:mmu-miR-16-5p,ENSMUSG00000023951:mmu-miR-126a-3p,ENSMUSG00000050395:mmu-miR-1903,ENSMUSG00000036707:mmu-miR-144-3p,ENSMUSG00000036707:mmu-miR-451a,ENSMUSG00000030525:mmu-miR-19a-3p,ENSMUSG00000005268:mmu-miR-1903,ENSMUSG00000023050:mmu-miR-19a-3p,ENSMUSG00000037225:mmu-miR-16-5p,ENSMUSG00000027164:mmu-miR-144-3p,ENSMUSG00000031392:mmu-miR-142a-3p,ENSMUSG00000039005:mmu-miR-1b-5…
Biological Process	GO:0072073	kidney epithelium development	12	199	3.60866e-06	5.49063e-05	ENSMUSG00000022528:mmu-miR-1a-3p,ENSMUSG00000040289:mmu-miR-451a,ENSMUSG00000048482:mmu-miR-1a-3p,ENSMUSG00000017491:mmu-miR-1a-3p,ENSMUSG00000045515:mmu-miR-140-3p,ENSMUSG00000030223:mmu-miR-1903,ENSMUSG00000023951:mmu-miR-16-5p,ENSMUSG00000023951:mmu-miR-126a-3p,ENSMUSG00000022346:mmu-miR-451a,ENSMUSG00000024563:mmu-miR-140-3p,ENSMUSG00000037225:mmu-miR-16-5p,ENSMUSG00000027276:mmu-miR-16-5p,EN…
Cellular Component	GO:0045202	synapse	37	1423	3.61007e-06	5.49063e-05	ENSMUSG00000022456:mmu-miR-1b-5p,ENSMUSG00000027712:mmu-miR-1a-3p,ENSMUSG00000037541:mmu-miR-451a,ENSMUSG00000059921:mmu-miR-144-3p,ENSMUSG00000030525:mmu-miR-19a-3p,ENSMUSG00000049336:mmu-miR-451a,ENSMUSG00000030223:mmu-miR-1903,ENSMUSG00000021700:mmu-miR-1903,ENSMUSG00000032076:mmu-miR-16-5p,ENSMUSG00000035109:mmu-miR-142a-3p,ENSMUSG00000008590:mmu-miR-1903,ENSMUSG00000020315:mmu-miR-144-3p,ENS…
Biological Process	GO:0002682	regulation of immune system process	52	2337	3.64744e-06	5.53684e-05	ENSMUSG00000026417:mmu-miR-1903,ENSMUSG00000027951:mmu-miR-1a-3p,ENSMUSG00000055204:mmu-miR-451a,ENSMUSG00000027852:mmu-miR-1b-5p,ENSMUSG00000022952:mmu-miR-126a-3p,ENSMUSG00000001175:mmu-miR-1a-3p,ENSMUSG00000036438:mmu-miR-1a-3p,ENSMUSG00000020053:mmu-miR-1a-3p,ENSMUSG00000052684:mmu-miR-16-5p,ENSMUSG00000052155:mmu-miR-1b-5p,ENSMUSG00000057329:mmu-miR-16-5p,ENSMUSG00000026012:mmu-miR-1b-5p,ENS…
Biological Process	GO:1901576	organic substance biosynthetic process	192	12877	3.68539e-06	5.58376e-05	ENSMUSG00000023050:mmu-miR-19a-3p,ENSMUSG00000023951:mmu-miR-16-5p,ENSMUSG00000023951:mmu-miR-126a-3p,ENSMUSG00000020868:mmu-miR-25-3p,ENSMUSG00000054611:mmu-miR-19a-3p,ENSMUSG00000060314:mmu-miR-1b-5p,ENSMUSG00000096688:mmu-miR-1a-3p,ENSMUSG00000096688:mmu-let-7i-5p,ENSMUSG00000026313:mmu-miR-1a-3p,ENSMUSG00000038193:mmu-miR-1a-3p,ENSMUSG00000055116:mmu-miR-142a-3p,ENSMUSG00000046020:mmu-miR-1b-…
Biological Process	GO:0042060	wound healing	28	926	3.77927e-06	5.70794e-05	ENSMUSG00000066551:mmu-miR-142a-3p,ENSMUSG00000021109:mmu-miR-144-3p,ENSMUSG00000009900:mmu-miR-16-5p,ENSMUSG00000074743:mmu-miR-451a,ENSMUSG00000028517:mmu-miR-16-5p,ENSMUSG00000027712:mmu-miR-1a-3p,ENSMUSG00000039005:mmu-miR-1b-5p,ENSMUSG00000006699:mmu-miR-1a-3p,ENSMUSG00000022306:mmu-miR-19a-3p,ENSMUSG00000037225:mmu-miR-16-5p,ENSMUSG00000026193:mmu-miR-1a-3p,ENSMUSG00000026193:mmu-miR-140-3p…
Biological Process	GO:0044092	negative regulation of molecular function	44	1842	3.78176e-06	5.70794e-05	ENSMUSG00000005533:mmu-miR-1a-3p,ENSMUSG00000042292:mmu-miR-1a-3p,ENSMUSG00000022528:mmu-miR-1a-3p,ENSMUSG00000033792:mmu-miR-1b-5p,ENSMUSG00000026313:mmu-miR-1a-3p,ENSMUSG00000020542:mmu-miR-1a-3p,ENSMUSG00000042845:mmu-miR-1b-5p,ENSMUSG00000023951:mmu-miR-16-5p,ENSMUSG00000023951:mmu-miR-126a-3p,ENSMUSG00000025266:mmu-let-7i-5p,ENSMUSG00000025860:mmu-miR-451a,ENSMUSG00000013663:mmu-miR-19a-3p,E…
Biological Process	GO:0060538	skeletal muscle organ development	17	395	3.83171e-06	5.75519e-05	ENSMUSG00000027852:mmu-miR-1b-5p,ENSMUSG00000021944:mmu-miR-1a-3p,ENSMUSG00000036144:mmu-miR-1a-3p,ENSMUSG00000057329:mmu-miR-16-5p,ENSMUSG00000006678:mmu-miR-1a-3p,ENSMUSG00000004872:mmu-miR-1a-3p,ENSMUSG00000022346:mmu-miR-451a,ENSMUSG00000026251:mmu-miR-19a-3p,ENSMUSG00000055116:mmu-miR-142a-3p,ENSMUSG00000020542:mmu-miR-1a-3p,ENSMUSG00000026313:mmu-miR-1a-3p,ENSMUSG00000050697:mmu-miR-144-3p,…
Biological Process	GO:1901215	negative regulation of neuron death	17	395	3.83171e-06	5.75519e-05	ENSMUSG00000029816:mmu-miR-1903,ENSMUSG00000020053:mmu-miR-1a-3p,ENSMUSG00000029104:mmu-miR-1b-5p,ENSMUSG00000057329:mmu-miR-16-5p,ENSMUSG00000025746:mmu-let-7i-5p,ENSMUSG00000025746:mmu-miR-142a-3p,ENSMUSG00000052684:mmu-miR-16-5p,ENSMUSG00000025860:mmu-miR-451a,ENSMUSG00000021549:mmu-miR-1a-3p,ENSMUSG00000048482:mmu-miR-1a-3p,ENSMUSG00000027665:mmu-miR-1b-5p,ENSMUSG00000023951:mmu-miR-16-5p,ENS…
Molecular Function	GO:0016773	phosphotransferase activity, alcohol group as acceptor	33	1199	3.83486e-06	5.75519e-05	ENSMUSG00000027665:mmu-miR-1b-5p,ENSMUSG00000005958:mmu-miR-1b-5p,ENSMUSG00000038145:mmu-miR-451a,ENSMUSG00000022861:mmu-miR-1903,ENSMUSG00000094793:mmu-miR-1a-3p,ENSMUSG00000001175:mmu-miR-1a-3p,ENSMUSG00000052155:mmu-miR-1b-5p,ENSMUSG00000036438:mmu-miR-1a-3p,ENSMUSG00000032788:mmu-miR-1b-5p,ENSMUSG00000041075:mmu-miR-1a-3p,ENSMUSG00000041075:mmu-miR-126a-3p,ENSMUSG00000009555:mmu-miR-1a-3p,ENS…
Biological Process	GO:0001947	heart looping	8	80	3.87597e-06	5.80589e-05	ENSMUSG00000050953:mmu-miR-1a-3p,ENSMUSG00000054611:mmu-miR-19a-3p,ENSMUSG00000038193:mmu-miR-1a-3p,ENSMUSG00000021944:mmu-miR-1a-3p,ENSMUSG00000021109:mmu-miR-144-3p,ENSMUSG00000015605:mmu-miR-1a-3p,ENSMUSG00000009900:mmu-miR-16-5p,ENSMUSG00000030201:mmu-miR-19a-3p
Biological Process	GO:0071417	cellular response to organonitrogen compound	27	876	3.98352e-06	5.95574e-05	ENSMUSG00000026193:mmu-miR-1a-3p,ENSMUSG00000026193:mmu-miR-140-3p,ENSMUSG00000026434:mmu-miR-451a,ENSMUSG00000039166:mmu-miR-1b-5p,ENSMUSG00000025586:mmu-miR-1a-3p,ENSMUSG00000025586:mmu-miR-25-3p,ENSMUSG00000050697:mmu-miR-144-3p,ENSMUSG00000050697:mmu-miR-451a,ENSMUSG00000021109:mmu-miR-144-3p,ENSMUSG00000029661:mmu-let-7i-5p,ENSMUSG00000024401:mmu-miR-19a-3p,ENSMUSG00000033792:mmu-miR-1b-5p,E…
Biological Process	GO:0070372	regulation of ERK1 and ERK2 cascade	21	577	4.02447e-06	6.00563e-05	ENSMUSG00000027654:mmu-miR-19a-3p,ENSMUSG00000090935:mmu-miR-1903,ENSMUSG00000039005:mmu-miR-1b-5p,ENSMUSG00000066551:mmu-miR-142a-3p,ENSMUSG00000023951:mmu-miR-16-5p,ENSMUSG00000023951:mmu-miR-126a-3p,ENSMUSG00000028086:mmu-miR-25-3p,ENSMUSG00000033307:mmu-miR-451a,ENSMUSG00000037225:mmu-miR-16-5p,ENSMUSG00000039661:mmu-miR-1903,ENSMUSG00000026193:mmu-miR-1a-3p,ENSMUSG00000026193:mmu-miR-140-3p,…
Cellular Component	GO:0120025	plasma membrane bounded cell projection	69	3466	4.04284e-06	6.02171e-05	ENSMUSG00000055980:mmu-miR-126a-3p,ENSMUSG00000027273:mmu-miR-19a-3p,ENSMUSG00000003452:mmu-miR-16-5p,ENSMUSG00000032913:mmu-miR-144-3p,ENSMUSG00000022346:mmu-miR-451a,ENSMUSG00000036745:mmu-miR-1903,ENSMUSG00000028184:mmu-miR-451a,ENSMUSG00000023033:mmu-miR-451a,ENSMUSG00000021756:mmu-miR-142a-3p,ENSMUSG00000022892:mmu-miR-16-5p,ENSMUSG00000023050:mmu-miR-19a-3p,ENSMUSG00000022762:mmu-miR-25-3p,…
Biological Process	GO:0061178	regulation of insulin secretion involved in cellular response to glucose stimulus	10	136	4.07352e-06	6.05602e-05	ENSMUSG00000078680:mmu-miR-1a-3p,ENSMUSG00000078673:mmu-miR-1a-3p,ENSMUSG00000073834:mmu-miR-1a-3p,ENSMUSG00000073834:mmu-let-7i-5p,ENSMUSG00000030557:mmu-miR-1a-3p,ENSMUSG00000021109:mmu-miR-144-3p,ENSMUSG00000094793:mmu-miR-1a-3p,ENSMUSG00000096688:mmu-miR-1a-3p,ENSMUSG00000096688:mmu-let-7i-5p,ENSMUSG00000033685:mmu-miR-1a-3p,ENSMUSG00000073830:mmu-miR-1a-3p,ENSMUSG00000034908:mmu-miR-451a
Biological Process	GO:0051336	regulation of hydrolase activity	49	2157	4.09277e-06	6.07323e-05	ENSMUSG00000020053:mmu-miR-1a-3p,ENSMUSG00000030465:mmu-miR-1b-5p,ENSMUSG00000036438:mmu-miR-1a-3p,ENSMUSG00000003032:mmu-miR-1a-3p,ENSMUSG00000029104:mmu-miR-1b-5p,ENSMUSG00000006678:mmu-miR-1a-3p,ENSMUSG00000022788:mmu-miR-16-5p,ENSMUSG00000052684:mmu-miR-16-5p,ENSMUSG00000020135:mmu-let-7i-5p,ENSMUSG00000017466:mmu-miR-19a-3p,ENSMUSG00000032413:mmu-miR-1b-5p,ENSMUSG00000020315:mmu-miR-144-3p,E…
Biological Process	GO:0055024	regulation of cardiac muscle tissue development	9	107	4.11013e-06	6.0876e-05	ENSMUSG00000022306:mmu-miR-19a-3p,ENSMUSG00000013663:mmu-miR-19a-3p,ENSMUSG00000013663:mmu-miR-19a-3p,ENSMUSG00000013663:mmu-miR-144-3p,ENSMUSG00000020542:mmu-miR-1a-3p,ENSMUSG00000030201:mmu-miR-19a-3p,ENSMUSG00000021944:mmu-miR-1a-3p,ENSMUSG00000009900:mmu-miR-16-5p,ENSMUSG00000020053:mmu-miR-1a-3p,ENSMUSG00000050953:mmu-miR-1a-3p,ENSMUSG00000037225:mmu-miR-16-5p
Biological Process	GO:0010676	positive regulation of cellular carbohydrate metabolic process	11	168	4.17422e-06	6.1595e-05	ENSMUSG00000055980:mmu-miR-126a-3p,ENSMUSG00000020053:mmu-miR-1a-3p,ENSMUSG00000078680:mmu-miR-1a-3p,ENSMUSG00000096688:mmu-miR-1a-3p,ENSMUSG00000096688:mmu-let-7i-5p,ENSMUSG00000094793:mmu-miR-1a-3p,ENSMUSG00000050697:mmu-miR-144-3p,ENSMUSG00000050697:mmu-miR-451a,ENSMUSG00000021109:mmu-miR-144-3p,ENSMUSG00000073834:mmu-miR-1a-3p,ENSMUSG00000073834:mmu-let-7i-5p,ENSMUSG00000078673:mmu-miR-1a-3p,…
Molecular Function	GO:0030165	PDZ domain binding	11	168	4.17422e-06	6.1595e-05	ENSMUSG00000050953:mmu-miR-1a-3p,ENSMUSG00000041075:mmu-miR-1a-3p,ENSMUSG00000041075:mmu-miR-126a-3p,ENSMUSG00000028184:mmu-miR-451a,ENSMUSG00000032076:mmu-miR-16-5p,ENSMUSG00000052155:mmu-miR-1b-5p,ENSMUSG00000061742:mmu-miR-1903,ENSMUSG00000013663:mmu-miR-19a-3p,ENSMUSG00000013663:mmu-miR-19a-3p,ENSMUSG00000013663:mmu-miR-144-3p,ENSMUSG00000024302:mmu-miR-1b-5p,ENSMUSG00000030302:mmu-let-7i-5p,…
Biological Process	GO:0060047	heart contraction	15	315	4.24298e-06	6.24933e-05	ENSMUSG00000021944:mmu-miR-1a-3p,ENSMUSG00000057123:mmu-miR-144-3p,ENSMUSG00000030557:mmu-miR-1a-3p,ENSMUSG00000054387:mmu-miR-16-5p,ENSMUSG00000001175:mmu-miR-1a-3p,ENSMUSG00000026313:mmu-miR-1a-3p,ENSMUSG00000041616:mmu-miR-1a-3p,ENSMUSG00000006699:mmu-miR-1a-3p,ENSMUSG00000031737:mmu-miR-1a-3p,ENSMUSG00000040752:mmu-miR-1a-3p,ENSMUSG00000000001:mmu-miR-451a,ENSMUSG00000030525:mmu-miR-19a-3p,EN…
Molecular Function	GO:0043169	cation binding	117	6935	4.27949e-06	6.29141e-05	ENSMUSG00000025324:mmu-miR-19a-3p,ENSMUSG00000022306:mmu-miR-19a-3p,ENSMUSG00000033961:mmu-miR-1b-5p,ENSMUSG00000020838:mmu-miR-16-5p,ENSMUSG00000060314:mmu-miR-1b-5p,ENSMUSG00000026313:mmu-miR-1a-3p,ENSMUSG00000033792:mmu-miR-1b-5p,ENSMUSG00000002748:mmu-miR-1903,ENSMUSG00000037736:mmu-miR-451a,ENSMUSG00000030302:mmu-let-7i-5p,ENSMUSG00000052656:mmu-miR-451a,ENSMUSG00000026234:mmu-miR-16-5p,ENSM…
Biological Process	GO:2000679	positive regulation of transcription regulatory region DNA binding	5	22	4.29198e-06	6.29808e-05	ENSMUSG00000020053:mmu-miR-1a-3p,ENSMUSG00000027164:mmu-miR-144-3p,ENSMUSG00000038193:mmu-miR-1a-3p,ENSMUSG00000009900:mmu-miR-16-5p,ENSMUSG00000003032:mmu-miR-1a-3p
Biological Process	GO:0001649	osteoblast differentiation	17	399	4.37843e-06	6.41307e-05	ENSMUSG00000020053:mmu-miR-1a-3p,ENSMUSG00000029816:mmu-miR-1903,ENSMUSG00000038193:mmu-miR-1a-3p,ENSMUSG00000034957:mmu-miR-144-3p,ENSMUSG00000052155:mmu-miR-1b-5p,ENSMUSG00000027276:mmu-miR-16-5p,ENSMUSG00000027951:mmu-miR-1a-3p,ENSMUSG00000040289:mmu-miR-451a,ENSMUSG00000021756:mmu-miR-142a-3p,ENSMUSG00000038331:mmu-miR-1b-5p,ENSMUSG00000050953:mmu-miR-1a-3p,ENSMUSG00000023951:mmu-miR-16-5p,EN…
Biological Process	GO:0051050	positive regulation of transport	43	1792	4.38784e-06	6.41499e-05	ENSMUSG00000023951:mmu-miR-16-5p,ENSMUSG00000023951:mmu-miR-126a-3p,ENSMUSG00000033307:mmu-miR-451a,ENSMUSG00000039166:mmu-miR-1b-5p,ENSMUSG00000050953:mmu-miR-1a-3p,ENSMUSG00000026234:mmu-miR-16-5p,ENSMUSG00000015243:mmu-miR-144-3p,ENSMUSG00000025980:mmu-miR-1a-3p,ENSMUSG00000020838:mmu-miR-16-5p,ENSMUSG00000090935:mmu-miR-1903,ENSMUSG00000039005:mmu-miR-1b-5p,ENSMUSG00000031834:mmu-miR-126a-3p,…
Biological Process	GO:0043388	positive regulation of DNA binding	12	203	4.42845e-06	6.46244e-05	ENSMUSG00000020542:mmu-miR-1a-3p,ENSMUSG00000001175:mmu-miR-1a-3p,ENSMUSG00000066551:mmu-miR-142a-3p,ENSMUSG00000022528:mmu-miR-1a-3p,ENSMUSG00000009900:mmu-miR-16-5p,ENSMUSG00000027164:mmu-miR-144-3p,ENSMUSG00000039005:mmu-miR-1b-5p,ENSMUSG00000003032:mmu-miR-1a-3p,ENSMUSG00000038193:mmu-miR-1a-3p,ENSMUSG00000022346:mmu-miR-451a,ENSMUSG00000036438:mmu-miR-1a-3p,ENSMUSG00000020053:mmu-miR-1a-3p
Biological Process	GO:0048635	negative regulation of muscle organ development	7	58	4.43687e-06	6.46282e-05	ENSMUSG00000020542:mmu-miR-1a-3p,ENSMUSG00000030201:mmu-miR-19a-3p,ENSMUSG00000027852:mmu-miR-1b-5p,ENSMUSG00000025746:mmu-let-7i-5p,ENSMUSG00000025746:mmu-miR-142a-3p,ENSMUSG00000048482:mmu-miR-1a-3p,ENSMUSG00000050953:mmu-miR-1a-3p,ENSMUSG00000013663:mmu-miR-19a-3p,ENSMUSG00000013663:mmu-miR-19a-3p,ENSMUSG00000013663:mmu-miR-144-3p
Cellular Component	GO:0097060	synaptic membrane	17	400	4.52563e-06	6.58002e-05	ENSMUSG00000025586:mmu-miR-1a-3p,ENSMUSG00000025586:mmu-miR-25-3p,ENSMUSG00000039579:mmu-miR-451a,ENSMUSG00000030525:mmu-miR-19a-3p,ENSMUSG00000049336:mmu-miR-451a,ENSMUSG00000035109:mmu-miR-142a-3p,ENSMUSG00000022456:mmu-miR-1b-5p,ENSMUSG00000037541:mmu-miR-451a,ENSMUSG00000026251:mmu-miR-19a-3p,ENSMUSG00000031144:mmu-miR-451a,ENSMUSG00000030465:mmu-miR-1b-5p,ENSMUSG00000035764:mmu-miR-1b-5p,ENS…
Biological Process	GO:0014909	smooth muscle cell migration	10	138	4.64269e-06	6.73786e-05	ENSMUSG00000057329:mmu-miR-16-5p,ENSMUSG00000050953:mmu-miR-1a-3p,ENSMUSG00000020053:mmu-miR-1a-3p,ENSMUSG00000030084:mmu-miR-1b-5p,ENSMUSG00000022346:mmu-miR-451a,ENSMUSG00000033307:mmu-miR-451a,ENSMUSG00000066551:mmu-miR-142a-3p,ENSMUSG00000021756:mmu-miR-142a-3p,ENSMUSG00000026313:mmu-miR-1a-3p,ENSMUSG00000033792:mmu-miR-1b-5p
Biological Process	GO:0048844	artery morphogenesis	8	82	4.67182e-06	6.76773e-05	ENSMUSG00000038193:mmu-miR-1a-3p,ENSMUSG00000023951:mmu-miR-16-5p,ENSMUSG00000023951:mmu-miR-126a-3p,ENSMUSG00000027276:mmu-miR-16-5p,ENSMUSG00000040289:mmu-miR-451a,ENSMUSG00000057123:mmu-miR-144-3p,ENSMUSG00000022528:mmu-miR-1a-3p,ENSMUSG00000015605:mmu-miR-1a-3p,ENSMUSG00000020542:mmu-miR-1a-3p
Biological Process	GO:0048771	tissue remodeling	16	359	4.74685e-06	6.86387e-05	ENSMUSG00000027087:mmu-miR-16-5p,ENSMUSG00000038193:mmu-miR-1a-3p,ENSMUSG00000029816:mmu-miR-1903,ENSMUSG00000020053:mmu-miR-1a-3p,ENSMUSG00000027276:mmu-miR-16-5p,ENSMUSG00000025746:mmu-let-7i-5p,ENSMUSG00000025746:mmu-miR-142a-3p,ENSMUSG00000030201:mmu-miR-19a-3p,ENSMUSG00000021944:mmu-miR-1a-3p,ENSMUSG00000023951:mmu-miR-16-5p,ENSMUSG00000023951:mmu-miR-126a-3p,ENSMUSG00000050953:mmu-miR-1a-3p…
Biological Process	GO:0003015	heart process	15	318	4.75752e-06	6.86678e-05	ENSMUSG00000040752:mmu-miR-1a-3p,ENSMUSG00000000001:mmu-miR-451a,ENSMUSG00000068457:mmu-miR-1b-5p,ENSMUSG00000050953:mmu-miR-1a-3p,ENSMUSG00000030525:mmu-miR-19a-3p,ENSMUSG00000036438:mmu-miR-1a-3p,ENSMUSG00000021944:mmu-miR-1a-3p,ENSMUSG00000057123:mmu-miR-144-3p,ENSMUSG00000030557:mmu-miR-1a-3p,ENSMUSG00000054387:mmu-miR-16-5p,ENSMUSG00000001175:mmu-miR-1a-3p,ENSMUSG00000026313:mmu-miR-1a-3p,EN…
Biological Process	GO:0009058	biosynthetic process	195	13174	4.79402e-06	6.90688e-05	ENSMUSG00000027490:mmu-miR-1b-5p,ENSMUSG00000017466:mmu-miR-19a-3p,ENSMUSG00000028967:mmu-miR-126a-3p,ENSMUSG00000041515:mmu-miR-451a,ENSMUSG00000030557:mmu-miR-1a-3p,ENSMUSG00000060534:mmu-miR-1903,ENSMUSG00000032788:mmu-miR-1b-5p,ENSMUSG00000002881:mmu-miR-1903,ENSMUSG00000036438:mmu-miR-1a-3p,ENSMUSG00000027210:mmu-let-7i-5p,ENSMUSG00000063804:mmu-miR-1b-5p,ENSMUSG00000026915:mmu-miR-1b-5p,ENS…
Cellular Component	GO:0098802	plasma membrane receptor complex	13	241	4.85881e-06	6.98752e-05	ENSMUSG00000037541:mmu-miR-451a,ENSMUSG00000021756:mmu-miR-142a-3p,ENSMUSG00000032243:mmu-miR-126a-3p,ENSMUSG00000027164:mmu-miR-144-3p,ENSMUSG00000008590:mmu-miR-1903,ENSMUSG00000017652:mmu-miR-16-5p,ENSMUSG00000025746:mmu-let-7i-5p,ENSMUSG00000025746:mmu-miR-142a-3p,ENSMUSG00000055980:mmu-miR-126a-3p,ENSMUSG00000052155:mmu-miR-1b-5p,ENSMUSG00000027087:mmu-miR-16-5p,ENSMUSG00000039579:mmu-miR-45…
Biological Process	GO:0009855	determination of bilateral symmetry	11	171	4.94854e-06	7.10367e-05	ENSMUSG00000041120:mmu-miR-1903,ENSMUSG00000030201:mmu-miR-19a-3p,ENSMUSG00000021944:mmu-miR-1a-3p,ENSMUSG00000009900:mmu-miR-16-5p,ENSMUSG00000021109:mmu-miR-144-3p,ENSMUSG00000015605:mmu-miR-1a-3p,ENSMUSG00000038193:mmu-miR-1a-3p,ENSMUSG00000050953:mmu-miR-1a-3p,ENSMUSG00000054611:mmu-miR-19a-3p,ENSMUSG00000024563:mmu-miR-140-3p,ENSMUSG00000052155:mmu-miR-1b-5p
Biological Process	GO:0043392	negative regulation of DNA binding	7	59	4.98494e-06	7.14298e-05	ENSMUSG00000022528:mmu-miR-1a-3p,ENSMUSG00000060206:mmu-miR-1b-5p,ENSMUSG00000052684:mmu-miR-16-5p,ENSMUSG00000040289:mmu-miR-451a,ENSMUSG00000027490:mmu-miR-1b-5p,ENSMUSG00000038193:mmu-miR-1a-3p,ENSMUSG00000028086:mmu-miR-25-3p
Biological Process	GO:0007623	circadian rhythm	17	403	4.99429e-06	7.14346e-05	ENSMUSG00000078680:mmu-miR-1a-3p,ENSMUSG00000020838:mmu-miR-16-5p,ENSMUSG00000073830:mmu-miR-1a-3p,ENSMUSG00000024401:mmu-miR-19a-3p,ENSMUSG00000096688:mmu-miR-1a-3p,ENSMUSG00000096688:mmu-let-7i-5p,ENSMUSG00000066551:mmu-miR-142a-3p,ENSMUSG00000073834:mmu-miR-1a-3p,ENSMUSG00000073834:mmu-let-7i-5p,ENSMUSG00000050697:mmu-miR-144-3p,ENSMUSG00000050697:mmu-miR-451a,ENSMUSG00000020053:mmu-miR-1a-3p,…
Molecular Function	GO:0001190	transcriptional activator activity, RNA polymerase II transcription factor binding	8	83	5.11899e-06	7.29548e-05	ENSMUSG00000022306:mmu-miR-19a-3p,ENSMUSG00000030557:mmu-miR-1a-3p,ENSMUSG00000042292:mmu-miR-1a-3p,ENSMUSG00000020542:mmu-miR-1a-3p,ENSMUSG00000055116:mmu-miR-142a-3p,ENSMUSG00000031930:mmu-miR-25-3p,ENSMUSG00000024921:mmu-miR-142a-3p,ENSMUSG00000003032:mmu-miR-1a-3p
Molecular Function	GO:0098811	transcriptional repressor activity, RNA polymerase II activating transcription factor binding	8	83	5.11899e-06	7.29548e-05	ENSMUSG00000024921:mmu-miR-142a-3p,ENSMUSG00000003032:mmu-miR-1a-3p,ENSMUSG00000031930:mmu-miR-25-3p,ENSMUSG00000055116:mmu-miR-142a-3p,ENSMUSG00000020542:mmu-miR-1a-3p,ENSMUSG00000042292:mmu-miR-1a-3p,ENSMUSG00000030557:mmu-miR-1a-3p,ENSMUSG00000022306:mmu-miR-19a-3p
Biological Process	GO:0009799	specification of symmetry	11	172	5.23314e-06	7.44477e-05	ENSMUSG00000041120:mmu-miR-1903,ENSMUSG00000030201:mmu-miR-19a-3p,ENSMUSG00000015605:mmu-miR-1a-3p,ENSMUSG00000021944:mmu-miR-1a-3p,ENSMUSG00000021109:mmu-miR-144-3p,ENSMUSG00000009900:mmu-miR-16-5p,ENSMUSG00000038193:mmu-miR-1a-3p,ENSMUSG00000054611:mmu-miR-19a-3p,ENSMUSG00000050953:mmu-miR-1a-3p,ENSMUSG00000024563:mmu-miR-140-3p,ENSMUSG00000052155:mmu-miR-1b-5p
Biological Process	GO:0048589	developmental growth	34	1274	5.26082e-06	7.47074e-05	ENSMUSG00000017491:mmu-miR-1a-3p,ENSMUSG00000030201:mmu-miR-19a-3p,ENSMUSG00000015605:mmu-miR-1a-3p,ENSMUSG00000021944:mmu-miR-1a-3p,ENSMUSG00000022892:mmu-miR-16-5p,ENSMUSG00000013663:mmu-miR-19a-3p,ENSMUSG00000013663:mmu-miR-19a-3p,ENSMUSG00000013663:mmu-miR-144-3p,ENSMUSG00000020542:mmu-miR-1a-3p,ENSMUSG00000022306:mmu-miR-19a-3p,ENSMUSG00000020838:mmu-miR-16-5p,ENSMUSG00000028736:mmu-miR-1a-3…
Biological Process	GO:0090278	negative regulation of peptide hormone secretion	10	140	5.27953e-06	7.4839e-05	ENSMUSG00000033685:mmu-miR-1a-3p,ENSMUSG00000073830:mmu-miR-1a-3p,ENSMUSG00000094793:mmu-miR-1a-3p,ENSMUSG00000096688:mmu-miR-1a-3p,ENSMUSG00000096688:mmu-let-7i-5p,ENSMUSG00000027712:mmu-miR-1a-3p,ENSMUSG00000078673:mmu-miR-1a-3p,ENSMUSG00000073834:mmu-miR-1a-3p,ENSMUSG00000073834:mmu-let-7i-5p,ENSMUSG00000030557:mmu-miR-1a-3p,ENSMUSG00000078680:mmu-miR-1a-3p,ENSMUSG00000055980:mmu-miR-126a-3p
Biological Process	GO:0050796	regulation of insulin secretion	15	321	5.32703e-06	7.53775e-05	ENSMUSG00000073834:mmu-miR-1a-3p,ENSMUSG00000073834:mmu-let-7i-5p,ENSMUSG00000078673:mmu-miR-1a-3p,ENSMUSG00000030557:mmu-miR-1a-3p,ENSMUSG00000021109:mmu-miR-144-3p,ENSMUSG00000024401:mmu-miR-19a-3p,ENSMUSG00000096688:mmu-miR-1a-3p,ENSMUSG00000096688:mmu-let-7i-5p,ENSMUSG00000094793:mmu-miR-1a-3p,ENSMUSG00000033685:mmu-miR-1a-3p,ENSMUSG00000073830:mmu-miR-1a-3p,ENSMUSG00000034908:mmu-miR-451a,EN…
Biological Process	GO:0044708	single-organism behavior	26	838	5.35792e-06	7.56794e-05	ENSMUSG00000020423:mmu-miR-25-3p,ENSMUSG00000020838:mmu-miR-16-5p,ENSMUSG00000037541:mmu-miR-451a,ENSMUSG00000021109:mmu-miR-144-3p,ENSMUSG00000030525:mmu-miR-19a-3p,ENSMUSG00000050953:mmu-miR-1a-3p,ENSMUSG00000000594:mmu-miR-451a,ENSMUSG00000037251:mmu-miR-16-5p,ENSMUSG00000022892:mmu-miR-16-5p,ENSMUSG00000013663:mmu-miR-19a-3p,ENSMUSG00000013663:mmu-miR-19a-3p,ENSMUSG00000013663:mmu-miR-144-3p,…
Molecular Function	GO:0000987	core promoter proximal region sequence-specific DNA binding	22	637	5.46775e-06	7.70933e-05	ENSMUSG00000003282:mmu-miR-1b-5p,ENSMUSG00000015605:mmu-miR-1a-3p,ENSMUSG00000021944:mmu-miR-1a-3p,ENSMUSG00000036144:mmu-miR-1a-3p,ENSMUSG00000030557:mmu-miR-1a-3p,ENSMUSG00000078619:mmu-miR-1a-3p,ENSMUSG00000026932:mmu-miR-1b-5p,ENSMUSG00000027210:mmu-let-7i-5p,ENSMUSG00000003032:mmu-miR-1a-3p,ENSMUSG00000015709:mmu-miR-451a,ENSMUSG00000028890:mmu-miR-1b-5p,ENSMUSG00000052684:mmu-miR-16-5p,ENSM…
Molecular Function	GO:0000978	RNA polymerase II core promoter proximal region sequence-specific DNA binding	21	589	5.51403e-06	7.76077e-05	ENSMUSG00000000902:mmu-miR-1a-3p,ENSMUSG00000038331:mmu-miR-1b-5p,ENSMUSG00000048251:mmu-miR-16-5p,ENSMUSG00000068457:mmu-miR-1b-5p,ENSMUSG00000024563:mmu-miR-140-3p,ENSMUSG00000023333:mmu-miR-1903,ENSMUSG00000036144:mmu-miR-1a-3p,ENSMUSG00000030557:mmu-miR-1a-3p,ENSMUSG00000021944:mmu-miR-1a-3p,ENSMUSG00000015605:mmu-miR-1a-3p,ENSMUSG00000003282:mmu-miR-1b-5p,ENSMUSG00000003847:mmu-miR-1a-3p,ENS…
Biological Process	GO:0045721	negative regulation of gluconeogenesis	7	60	5.58819e-06	7.85121e-05	ENSMUSG00000094793:mmu-miR-1a-3p,ENSMUSG00000096688:mmu-miR-1a-3p,ENSMUSG00000096688:mmu-let-7i-5p,ENSMUSG00000025746:mmu-let-7i-5p,ENSMUSG00000025746:mmu-miR-142a-3p,ENSMUSG00000073834:mmu-miR-1a-3p,ENSMUSG00000073834:mmu-let-7i-5p,ENSMUSG00000078673:mmu-miR-1a-3p,ENSMUSG00000073830:mmu-miR-1a-3p,ENSMUSG00000078680:mmu-miR-1a-3p
Biological Process	GO:0022612	gland morphogenesis	14	283	5.72861e-06	8.03425e-05	ENSMUSG00000028086:mmu-miR-25-3p,ENSMUSG00000030084:mmu-miR-1b-5p,ENSMUSG00000020053:mmu-miR-1a-3p,ENSMUSG00000057329:mmu-miR-16-5p,ENSMUSG00000006678:mmu-miR-1a-3p,ENSMUSG00000025746:mmu-let-7i-5p,ENSMUSG00000025746:mmu-miR-142a-3p,ENSMUSG00000004872:mmu-miR-1a-3p,ENSMUSG00000005533:mmu-miR-1a-3p,ENSMUSG00000006699:mmu-miR-1a-3p,ENSMUSG00000024401:mmu-miR-19a-3p,ENSMUSG00000030201:mmu-miR-19a-3p…
Molecular Function	GO:0001159	core promoter proximal region DNA binding	22	640	5.88681e-06	8.2405e-05	ENSMUSG00000003282:mmu-miR-1b-5p,ENSMUSG00000021944:mmu-miR-1a-3p,ENSMUSG00000015605:mmu-miR-1a-3p,ENSMUSG00000030557:mmu-miR-1a-3p,ENSMUSG00000036144:mmu-miR-1a-3p,ENSMUSG00000034957:mmu-miR-144-3p,ENSMUSG00000022346:mmu-miR-451a,ENSMUSG00000002111:mmu-miR-126a-3p,ENSMUSG00000003847:mmu-miR-1a-3p,ENSMUSG00000078619:mmu-miR-1a-3p,ENSMUSG00000027210:mmu-let-7i-5p,ENSMUSG00000015709:mmu-miR-451a,EN…
Molecular Function	GO:0005042	netrin receptor activity	3	4	5.89647e-06	8.2405e-05	ENSMUSG00000060534:mmu-miR-1903,ENSMUSG00000020099:mmu-miR-1b-5p,ENSMUSG00000059921:mmu-miR-144-3p
Biological Process	GO:0009952	anterior/posterior pattern specification	14	284	5.96395e-06	8.30534e-05	ENSMUSG00000030201:mmu-miR-19a-3p,ENSMUSG00000036144:mmu-miR-1a-3p,ENSMUSG00000040289:mmu-miR-451a,ENSMUSG00000022528:mmu-miR-1a-3p,ENSMUSG00000021944:mmu-miR-1a-3p,ENSMUSG00000015605:mmu-miR-1a-3p,ENSMUSG00000009900:mmu-miR-16-5p,ENSMUSG00000020423:mmu-miR-25-3p,ENSMUSG00000038227:mmu-miR-126a-3p,ENSMUSG00000029104:mmu-miR-1b-5p,ENSMUSG00000052155:mmu-miR-1b-5p,ENSMUSG00000004872:mmu-miR-1a-3p,E…
Biological Process	GO:0031000	response to caffeine	6	40	5.97431e-06	8.30534e-05	ENSMUSG00000020053:mmu-miR-1a-3p,ENSMUSG00000032113:mmu-miR-1b-5p,ENSMUSG00000055980:mmu-miR-126a-3p,ENSMUSG00000050697:mmu-miR-144-3p,ENSMUSG00000050697:mmu-miR-451a,ENSMUSG00000025746:mmu-let-7i-5p,ENSMUSG00000025746:mmu-miR-142a-3p,ENSMUSG00000057329:mmu-miR-16-5p
Biological Process	GO:0061614	pri-miRNA transcription from RNA polymerase II promoter	6	40	5.97431e-06	8.30534e-05	ENSMUSG00000002111:mmu-miR-126a-3p,ENSMUSG00000026313:mmu-miR-1a-3p,ENSMUSG00000032035:mmu-miR-1a-3p,ENSMUSG00000052684:mmu-miR-16-5p,ENSMUSG00000021109:mmu-miR-144-3p,ENSMUSG00000015605:mmu-miR-1a-3p
Biological Process	GO:0043405	regulation of MAP kinase activity	19	499	6.12803e-06	8.50411e-05	ENSMUSG00000020053:mmu-miR-1a-3p,ENSMUSG00000031555:mmu-miR-126a-3p,ENSMUSG00000022788:mmu-miR-16-5p,ENSMUSG00000048482:mmu-miR-1a-3p,ENSMUSG00000023951:mmu-miR-16-5p,ENSMUSG00000023951:mmu-miR-126a-3p,ENSMUSG00000033307:mmu-miR-451a,ENSMUSG00000030525:mmu-miR-19a-3p,ENSMUSG00000027351:mmu-miR-144-3p,ENSMUSG00000027351:mmu-miR-126a-3p,ENSMUSG00000023050:mmu-miR-19a-3p,ENSMUSG00000030744:mmu-miR-1…
Molecular Function	GO:0043167	ion binding	162	10513	6.24416e-06	8.65013e-05	ENSMUSG00000030525:mmu-miR-19a-3p,ENSMUSG00000021700:mmu-miR-1903,ENSMUSG00000023333:mmu-miR-1903,ENSMUSG00000030729:mmu-miR-1b-5p,ENSMUSG00000027784:mmu-miR-451a,ENSMUSG00000020272:mmu-miR-25-3p,ENSMUSG00000078866:mmu-miR-25-3p,ENSMUSG00000030156:mmu-miR-25-3p,ENSMUSG00000009555:mmu-miR-1a-3p,ENSMUSG00000032788:mmu-miR-1b-5p,ENSMUSG00000050017:mmu-miR-1b-5p,ENSMUSG00000036438:mmu-miR-1a-3p,ENSMU…
Biological Process	GO:0010631	epithelial cell migration	18	455	6.39669e-06	8.84596e-05	ENSMUSG00000036144:mmu-miR-1a-3p,ENSMUSG00000015605:mmu-miR-1a-3p,ENSMUSG00000022505:mmu-miR-1903,ENSMUSG00000013663:mmu-miR-19a-3p,ENSMUSG00000013663:mmu-miR-19a-3p,ENSMUSG00000013663:mmu-miR-144-3p,ENSMUSG00000032035:mmu-miR-1a-3p,ENSMUSG00000003032:mmu-miR-1a-3p,ENSMUSG00000052684:mmu-miR-16-5p,ENSMUSG00000031555:mmu-miR-126a-3p,ENSMUSG00000027087:mmu-miR-16-5p,ENSMUSG00000021256:mmu-miR-1903,…
Biological Process	GO:0002520	immune system development	42	1759	6.43437e-06	8.88257e-05	ENSMUSG00000028717:mmu-miR-126a-3p,ENSMUSG00000017652:mmu-miR-16-5p,ENSMUSG00000025980:mmu-miR-1a-3p,ENSMUSG00000033792:mmu-miR-1b-5p,ENSMUSG00000022528:mmu-miR-1a-3p,ENSMUSG00000021109:mmu-miR-144-3p,ENSMUSG00000023951:mmu-miR-16-5p,ENSMUSG00000023951:mmu-miR-126a-3p,ENSMUSG00000014074:mmu-miR-16-5p,ENSMUSG00000038227:mmu-miR-126a-3p,ENSMUSG00000015605:mmu-miR-1a-3p,ENSMUSG00000038193:mmu-miR-1a…
Cellular Component	GO:0044297	cell body	33	1230	6.51486e-06	8.97804e-05	ENSMUSG00000033792:mmu-miR-1b-5p,ENSMUSG00000030302:mmu-let-7i-5p,ENSMUSG00000005533:mmu-miR-1a-3p,ENSMUSG00000017652:mmu-miR-16-5p,ENSMUSG00000039579:mmu-miR-451a,ENSMUSG00000025586:mmu-miR-1a-3p,ENSMUSG00000025586:mmu-miR-25-3p,ENSMUSG00000021756:mmu-miR-142a-3p,ENSMUSG00000030201:mmu-miR-19a-3p,ENSMUSG00000021288:mmu-miR-16-5p,ENSMUSG00000032589:mmu-miR-144-3p,ENSMUSG00000032589:mmu-miR-1b-5p,…
Biological Process	GO:0061371	determination of heart left/right asymmetry	8	86	6.68388e-06	9.19498e-05	ENSMUSG00000050953:mmu-miR-1a-3p,ENSMUSG00000054611:mmu-miR-19a-3p,ENSMUSG00000038193:mmu-miR-1a-3p,ENSMUSG00000015605:mmu-miR-1a-3p,ENSMUSG00000021944:mmu-miR-1a-3p,ENSMUSG00000021109:mmu-miR-144-3p,ENSMUSG00000009900:mmu-miR-16-5p,ENSMUSG00000030201:mmu-miR-19a-3p
Biological Process	GO:0007626	locomotory behavior	19	503	6.86066e-06	9.42182e-05	ENSMUSG00000029104:mmu-miR-1b-5p,ENSMUSG00000027273:mmu-miR-19a-3p,ENSMUSG00000023033:mmu-miR-451a,ENSMUSG00000004319:mmu-miR-1a-3p,ENSMUSG00000062202:mmu-miR-1903,ENSMUSG00000094793:mmu-miR-1a-3p,ENSMUSG00000046876:mmu-miR-19a-3p,ENSMUSG00000078673:mmu-miR-1a-3p,ENSMUSG00000022892:mmu-miR-16-5p,ENSMUSG00000013663:mmu-miR-19a-3p,ENSMUSG00000013663:mmu-miR-19a-3p,ENSMUSG00000013663:mmu-miR-144-3p,…
Biological Process	GO:0046888	negative regulation of hormone secretion	11	177	6.8811e-06	9.43354e-05	ENSMUSG00000078673:mmu-miR-1a-3p,ENSMUSG00000073834:mmu-miR-1a-3p,ENSMUSG00000073834:mmu-let-7i-5p,ENSMUSG00000030557:mmu-miR-1a-3p,ENSMUSG00000096688:mmu-miR-1a-3p,ENSMUSG00000096688:mmu-let-7i-5p,ENSMUSG00000094793:mmu-miR-1a-3p,ENSMUSG00000027712:mmu-miR-1a-3p,ENSMUSG00000073830:mmu-miR-1a-3p,ENSMUSG00000033685:mmu-miR-1a-3p,ENSMUSG00000055980:mmu-miR-126a-3p,ENSMUSG00000025746:mmu-let-7i-5p,E…
Biological Process	GO:0008016	regulation of heart contraction	13	249	6.91724e-06	9.437e-05	ENSMUSG00000036438:mmu-miR-1a-3p,ENSMUSG00000050953:mmu-miR-1a-3p,ENSMUSG00000030525:mmu-miR-19a-3p,ENSMUSG00000040752:mmu-miR-1a-3p,ENSMUSG00000000001:mmu-miR-451a,ENSMUSG00000041616:mmu-miR-1a-3p,ENSMUSG00000031737:mmu-miR-1a-3p,ENSMUSG00000054387:mmu-miR-16-5p,ENSMUSG00000057123:mmu-miR-144-3p,ENSMUSG00000030557:mmu-miR-1a-3p,ENSMUSG00000021944:mmu-miR-1a-3p,ENSMUSG00000026313:mmu-miR-1a-3p,EN…
Biological Process	GO:0051055	negative regulation of lipid biosynthetic process	9	114	6.92613e-06	9.437e-05	ENSMUSG00000078680:mmu-miR-1a-3p,ENSMUSG00000028086:mmu-miR-25-3p,ENSMUSG00000073830:mmu-miR-1a-3p,ENSMUSG00000050697:mmu-miR-144-3p,ENSMUSG00000050697:mmu-miR-451a,ENSMUSG00000073834:mmu-miR-1a-3p,ENSMUSG00000073834:mmu-let-7i-5p,ENSMUSG00000078673:mmu-miR-1a-3p,ENSMUSG00000096688:mmu-miR-1a-3p,ENSMUSG00000096688:mmu-let-7i-5p,ENSMUSG00000094793:mmu-miR-1a-3p,ENSMUSG00000031483:mmu-miR-16-5p
Biological Process	GO:0055006	cardiac cell development	9	114	6.92613e-06	9.437e-05	ENSMUSG00000041616:mmu-miR-1a-3p,ENSMUSG00000020542:mmu-miR-1a-3p,ENSMUSG00000015605:mmu-miR-1a-3p,ENSMUSG00000021944:mmu-miR-1a-3p,ENSMUSG00000030557:mmu-miR-1a-3p,ENSMUSG00000023951:mmu-miR-16-5p,ENSMUSG00000023951:mmu-miR-126a-3p,ENSMUSG00000020053:mmu-miR-1a-3p,ENSMUSG00000027276:mmu-miR-16-5p,ENSMUSG00000040752:mmu-miR-1a-3p
Molecular Function	GO:0070888	E-box binding	6	41	6.93126e-06	9.437e-05	ENSMUSG00000021109:mmu-miR-144-3p,ENSMUSG00000022528:mmu-miR-1a-3p,ENSMUSG00000055116:mmu-miR-142a-3p,ENSMUSG00000022346:mmu-miR-451a,ENSMUSG00000028717:mmu-miR-126a-3p,ENSMUSG00000038193:mmu-miR-1a-3p
Biological Process	GO:0090132	epithelium migration	18	460	7.42145e-06	0.000100871	ENSMUSG00000023951:mmu-miR-16-5p,ENSMUSG00000023951:mmu-miR-126a-3p,ENSMUSG00000059895:mmu-miR-144-3p,ENSMUSG00000028086:mmu-miR-25-3p,ENSMUSG00000037225:mmu-miR-16-5p,ENSMUSG00000090935:mmu-miR-1903,ENSMUSG00000021109:mmu-miR-144-3p,ENSMUSG00000066551:mmu-miR-142a-3p,ENSMUSG00000028517:mmu-miR-16-5p,ENSMUSG00000027087:mmu-miR-16-5p,ENSMUSG00000021256:mmu-miR-1903,ENSMUSG00000052684:mmu-miR-16-5p…
Biological Process	GO:0010906	regulation of glucose metabolic process	13	252	7.86794e-06	0.000106756	ENSMUSG00000025746:mmu-let-7i-5p,ENSMUSG00000025746:mmu-miR-142a-3p,ENSMUSG00000055980:mmu-miR-126a-3p,ENSMUSG00000020053:mmu-miR-1a-3p,ENSMUSG00000078680:mmu-miR-1a-3p,ENSMUSG00000096688:mmu-miR-1a-3p,ENSMUSG00000096688:mmu-let-7i-5p,ENSMUSG00000094793:mmu-miR-1a-3p,ENSMUSG00000021109:mmu-miR-144-3p,ENSMUSG00000050697:mmu-miR-144-3p,ENSMUSG00000050697:mmu-miR-451a,ENSMUSG00000078673:mmu-miR-1a-3…
Biological Process	GO:0090276	regulation of peptide hormone secretion	16	374	7.93347e-06	0.000107461	ENSMUSG00000055116:mmu-miR-142a-3p,ENSMUSG00000027273:mmu-miR-19a-3p,ENSMUSG00000055980:mmu-miR-126a-3p,ENSMUSG00000034908:mmu-miR-451a,ENSMUSG00000030557:mmu-miR-1a-3p,ENSMUSG00000078673:mmu-miR-1a-3p,ENSMUSG00000094793:mmu-miR-1a-3p,ENSMUSG00000050953:mmu-miR-1a-3p,ENSMUSG00000078680:mmu-miR-1a-3p,ENSMUSG00000073830:mmu-miR-1a-3p,ENSMUSG00000033685:mmu-miR-1a-3p,ENSMUSG00000021109:mmu-miR-144-3…
Biological Process	GO:0040008	regulation of growth	29	1020	8.20091e-06	0.000110705	ENSMUSG00000013663:mmu-miR-19a-3p,ENSMUSG00000013663:mmu-miR-19a-3p,ENSMUSG00000013663:mmu-miR-144-3p,ENSMUSG00000041515:mmu-miR-451a,ENSMUSG00000009073:mmu-let-7i-5p,ENSMUSG00000022892:mmu-miR-16-5p,ENSMUSG00000039953:mmu-miR-451a,ENSMUSG00000021944:mmu-miR-1a-3p,ENSMUSG00000019647:mmu-miR-142a-3p,ENSMUSG00000015605:mmu-miR-1a-3p,ENSMUSG00000027665:mmu-miR-1b-5p,ENSMUSG00000048482:mmu-miR-1a-3p,…
Cellular Component	GO:0098805	whole membrane	47	2087	8.19317e-06	0.000110705	ENSMUSG00000028945:mmu-miR-1a-3p,ENSMUSG00000020099:mmu-miR-1b-5p,ENSMUSG00000027351:mmu-miR-144-3p,ENSMUSG00000027351:mmu-miR-126a-3p,ENSMUSG00000026029:mmu-miR-1b-5p,ENSMUSG00000030525:mmu-miR-19a-3p,ENSMUSG00000037523:mmu-miR-1b-5p,ENSMUSG00000074743:mmu-miR-451a,ENSMUSG00000024401:mmu-miR-19a-3p,ENSMUSG00000057329:mmu-miR-16-5p,ENSMUSG00000026012:mmu-miR-1b-5p,ENSMUSG00000006678:mmu-miR-1a-3p…
Biological Process	GO:0006979	response to oxidative stress	28	966	8.2743e-06	0.000111506	ENSMUSG00000025980:mmu-miR-1a-3p,ENSMUSG00000033685:mmu-miR-1a-3p,ENSMUSG00000039005:mmu-miR-1b-5p,ENSMUSG00000033792:mmu-miR-1b-5p,ENSMUSG00000024401:mmu-miR-19a-3p,ENSMUSG00000021109:mmu-miR-144-3p,ENSMUSG00000050697:mmu-miR-144-3p,ENSMUSG00000050697:mmu-miR-451a,ENSMUSG00000028086:mmu-miR-25-3p,ENSMUSG00000033307:mmu-miR-451a,ENSMUSG00000026193:mmu-miR-1a-3p,ENSMUSG00000026193:mmu-miR-140-3p,E…
Biological Process	GO:0051099	positive regulation of binding	17	419	8.31164e-06	0.000111819	ENSMUSG00000025266:mmu-let-7i-5p,ENSMUSG00000027164:mmu-miR-144-3p,ENSMUSG00000039005:mmu-miR-1b-5p,ENSMUSG00000027479:mmu-miR-144-3p,ENSMUSG00000020542:mmu-miR-1a-3p,ENSMUSG00000009555:mmu-miR-1a-3p,ENSMUSG00000066551:mmu-miR-142a-3p,ENSMUSG00000022528:mmu-miR-1a-3p,ENSMUSG00000009900:mmu-miR-16-5p,ENSMUSG00000038193:mmu-miR-1a-3p,ENSMUSG00000022346:mmu-miR-451a,ENSMUSG00000036438:mmu-miR-1a-3p,…
Biological Process	GO:0001570	vasculogenesis	10	148	8.64379e-06	0.000115894	ENSMUSG00000023951:mmu-miR-16-5p,ENSMUSG00000023951:mmu-miR-126a-3p,ENSMUSG00000027087:mmu-miR-16-5p,ENSMUSG00000028086:mmu-miR-25-3p,ENSMUSG00000022505:mmu-miR-1903,ENSMUSG00000022306:mmu-miR-19a-3p,ENSMUSG00000021944:mmu-miR-1a-3p,ENSMUSG00000040289:mmu-miR-451a,ENSMUSG00000021549:mmu-miR-1a-3p,ENSMUSG00000020542:mmu-miR-1a-3p,ENSMUSG00000049791:mmu-miR-19a-3p
Biological Process	GO:0072132	mesenchyme morphogenesis	7	64	8.64255e-06	0.000115894	ENSMUSG00000054387:mmu-miR-16-5p,ENSMUSG00000031972:mmu-miR-1a-3p,ENSMUSG00000040289:mmu-miR-451a,ENSMUSG00000024563:mmu-miR-140-3p,ENSMUSG00000009900:mmu-miR-16-5p,ENSMUSG00000029104:mmu-miR-1b-5p,ENSMUSG00000022346:mmu-miR-451a
Biological Process	GO:0071456	cellular response to hypoxia	13	255	8.93204e-06	0.000119557	ENSMUSG00000023951:mmu-miR-16-5p,ENSMUSG00000023951:mmu-miR-126a-3p,ENSMUSG00000033307:mmu-miR-451a,ENSMUSG00000025586:mmu-miR-1a-3p,ENSMUSG00000025586:mmu-miR-25-3p,ENSMUSG00000027715:mmu-miR-1b-5p,ENSMUSG00000057329:mmu-miR-16-5p,ENSMUSG00000013663:mmu-miR-19a-3p,ENSMUSG00000013663:mmu-miR-19a-3p,ENSMUSG00000013663:mmu-miR-144-3p,ENSMUSG00000031392:mmu-miR-142a-3p,ENSMUSG00000027490:mmu-miR-1b-…
Biological Process	GO:0060562	epithelial tube morphogenesis	19	513	9.04974e-06	0.000120928	ENSMUSG00000021109:mmu-miR-144-3p,ENSMUSG00000009900:mmu-miR-16-5p,ENSMUSG00000022528:mmu-miR-1a-3p,ENSMUSG00000024401:mmu-miR-19a-3p,ENSMUSG00000027164:mmu-miR-144-3p,ENSMUSG00000037225:mmu-miR-16-5p,ENSMUSG00000026029:mmu-miR-1b-5p,ENSMUSG00000050953:mmu-miR-1a-3p,ENSMUSG00000054611:mmu-miR-19a-3p,ENSMUSG00000023951:mmu-miR-16-5p,ENSMUSG00000023951:mmu-miR-126a-3p,ENSMUSG00000021944:mmu-miR-1a-…
Biological Process	GO:0003179	heart valve morphogenesis	6	43	9.21818e-06	0.000122971	ENSMUSG00000021944:mmu-miR-1a-3p,ENSMUSG00000054387:mmu-miR-16-5p,ENSMUSG00000057123:mmu-miR-144-3p,ENSMUSG00000040289:mmu-miR-451a,ENSMUSG00000027276:mmu-miR-16-5p,ENSMUSG00000022306:mmu-miR-19a-3p
Biological Process	GO:0007409	axonogenesis	24	760	9.23387e-06	0.000122973	ENSMUSG00000035764:mmu-miR-1b-5p,ENSMUSG00000057329:mmu-miR-16-5p,ENSMUSG00000027273:mmu-miR-19a-3p,ENSMUSG00000030084:mmu-miR-1b-5p,ENSMUSG00000027852:mmu-miR-1b-5p,ENSMUSG00000019647:mmu-miR-142a-3p,ENSMUSG00000015605:mmu-miR-1a-3p,ENSMUSG00000060534:mmu-miR-1903,ENSMUSG00000005958:mmu-miR-1b-5p,ENSMUSG00000048482:mmu-miR-1a-3p,ENSMUSG00000022892:mmu-miR-16-5p,ENSMUSG00000013663:mmu-miR-19a-3p,…
Biological Process	GO:0051347	positive regulation of transferase activity	32	1198	9.84978e-06	0.000130956	ENSMUSG00000023050:mmu-miR-19a-3p,ENSMUSG00000037225:mmu-miR-16-5p,ENSMUSG00000033307:mmu-miR-451a,ENSMUSG00000023951:mmu-miR-16-5p,ENSMUSG00000023951:mmu-miR-126a-3p,ENSMUSG00000049791:mmu-miR-19a-3p,ENSMUSG00000039005:mmu-miR-1b-5p,ENSMUSG00000017652:mmu-miR-16-5p,ENSMUSG00000031555:mmu-miR-126a-3p,ENSMUSG00000055980:mmu-miR-126a-3p,ENSMUSG00000022346:mmu-miR-451a,ENSMUSG00000022505:mmu-miR-190…
Biological Process	GO:0003002	regionalization	18	470	9.92446e-06	0.000131728	ENSMUSG00000029104:mmu-miR-1b-5p,ENSMUSG00000004872:mmu-miR-1a-3p,ENSMUSG00000052155:mmu-miR-1b-5p,ENSMUSG00000034673:mmu-miR-1903,ENSMUSG00000046020:mmu-miR-1b-5p,ENSMUSG00000030201:mmu-miR-19a-3p,ENSMUSG00000021944:mmu-miR-1a-3p,ENSMUSG00000015605:mmu-miR-1a-3p,ENSMUSG00000040289:mmu-miR-451a,ENSMUSG00000036144:mmu-miR-1a-3p,ENSMUSG00000038227:mmu-miR-126a-3p,ENSMUSG00000028736:mmu-miR-1a-3p,EN…
Molecular Function	GO:0042802	identical protein binding	62	3086	1.02029e-05	0.000135197	ENSMUSG00000060534:mmu-miR-1903,ENSMUSG00000022952:mmu-miR-126a-3p,ENSMUSG00000046876:mmu-miR-19a-3p,ENSMUSG00000062908:mmu-miR-19a-3p,ENSMUSG00000022285:mmu-miR-451a,ENSMUSG00000038766:mmu-miR-1b-5p,ENSMUSG00000054072:mmu-miR-1903,ENSMUSG00000052684:mmu-miR-16-5p,ENSMUSG00000026012:mmu-miR-1b-5p,ENSMUSG00000057329:mmu-miR-16-5p,ENSMUSG00000029104:mmu-miR-1b-5p,ENSMUSG00000026932:mmu-miR-1b-5p,EN…
Biological Process	GO:0030335	positive regulation of cell migration	24	765	1.02834e-05	0.000136036	ENSMUSG00000055980:mmu-miR-126a-3p,ENSMUSG00000052684:mmu-miR-16-5p,ENSMUSG00000031555:mmu-miR-126a-3p,ENSMUSG00000032035:mmu-miR-1a-3p,ENSMUSG00000057329:mmu-miR-16-5p,ENSMUSG00000020053:mmu-miR-1a-3p,ENSMUSG00000022346:mmu-miR-451a,ENSMUSG00000029816:mmu-miR-1903,ENSMUSG00000027087:mmu-miR-16-5p,ENSMUSG00000019647:mmu-miR-142a-3p,ENSMUSG00000021756:mmu-miR-142a-3p,ENSMUSG00000037225:mmu-miR-16-…
Biological Process	GO:0035773	insulin secretion involved in cellular response to glucose stimulus	10	151	1.03141e-05	0.000136215	ENSMUSG00000078680:mmu-miR-1a-3p,ENSMUSG00000094793:mmu-miR-1a-3p,ENSMUSG00000096688:mmu-miR-1a-3p,ENSMUSG00000096688:mmu-let-7i-5p,ENSMUSG00000021109:mmu-miR-144-3p,ENSMUSG00000073834:mmu-miR-1a-3p,ENSMUSG00000073834:mmu-let-7i-5p,ENSMUSG00000078673:mmu-miR-1a-3p,ENSMUSG00000030557:mmu-miR-1a-3p,ENSMUSG00000034908:mmu-miR-451a,ENSMUSG00000073830:mmu-miR-1a-3p,ENSMUSG00000033685:mmu-miR-1a-3p
Biological Process	GO:0010613	positive regulation of cardiac muscle hypertrophy	6	44	1.05712e-05	0.000138457	ENSMUSG00000038193:mmu-miR-1a-3p,ENSMUSG00000020053:mmu-miR-1a-3p,ENSMUSG00000021756:mmu-miR-142a-3p,ENSMUSG00000027716:mmu-miR-451a,ENSMUSG00000030557:mmu-miR-1a-3p,ENSMUSG00000009555:mmu-miR-1a-3p
Biological Process	GO:0014031	mesenchymal cell development	9	120	1.05208e-05	0.000138457	ENSMUSG00000040289:mmu-miR-451a,ENSMUSG00000019647:mmu-miR-142a-3p,ENSMUSG00000022528:mmu-miR-1a-3p,ENSMUSG00000021109:mmu-miR-144-3p,ENSMUSG00000038193:mmu-miR-1a-3p,ENSMUSG00000057329:mmu-miR-16-5p,ENSMUSG00000026193:mmu-miR-1a-3p,ENSMUSG00000026193:mmu-miR-140-3p,ENSMUSG00000027276:mmu-miR-16-5p,ENSMUSG00000004872:mmu-miR-1a-3p
Biological Process	GO:0014742	positive regulation of muscle hypertrophy	6	44	1.05712e-05	0.000138457	ENSMUSG00000020053:mmu-miR-1a-3p,ENSMUSG00000038193:mmu-miR-1a-3p,ENSMUSG00000009555:mmu-miR-1a-3p,ENSMUSG00000030557:mmu-miR-1a-3p,ENSMUSG00000021756:mmu-miR-142a-3p,ENSMUSG00000027716:mmu-miR-451a
Biological Process	GO:0031400	negative regulation of protein modification process	28	979	1.05591e-05	0.000138457	ENSMUSG00000090877:mmu-miR-1a-3p,ENSMUSG00000090935:mmu-miR-1903,ENSMUSG00000039005:mmu-miR-1b-5p,ENSMUSG00000005533:mmu-miR-1a-3p,ENSMUSG00000000902:mmu-miR-1a-3p,ENSMUSG00000024401:mmu-miR-19a-3p,ENSMUSG00000028517:mmu-miR-16-5p,ENSMUSG00000020542:mmu-miR-1a-3p,ENSMUSG00000030744:mmu-miR-1b-5p,ENSMUSG00000025266:mmu-let-7i-5p,ENSMUSG00000027351:mmu-miR-144-3p,ENSMUSG00000027351:mmu-miR-126a-3p,…
Biological Process	GO:0048512	circadian behavior	9	120	1.05208e-05	0.000138457	ENSMUSG00000078680:mmu-miR-1a-3p,ENSMUSG00000025746:mmu-let-7i-5p,ENSMUSG00000025746:mmu-miR-142a-3p,ENSMUSG00000013663:mmu-miR-19a-3p,ENSMUSG00000013663:mmu-miR-19a-3p,ENSMUSG00000013663:mmu-miR-144-3p,ENSMUSG00000073830:mmu-miR-1a-3p,ENSMUSG00000096688:mmu-miR-1a-3p,ENSMUSG00000096688:mmu-let-7i-5p,ENSMUSG00000094793:mmu-miR-1a-3p,ENSMUSG00000062202:mmu-miR-1903,ENSMUSG00000073834:mmu-miR-1a-3p…
Biological Process	GO:0051224	negative regulation of protein transport	15	341	1.09447e-05	0.000143112	ENSMUSG00000073830:mmu-miR-1a-3p,ENSMUSG00000033685:mmu-miR-1a-3p,ENSMUSG00000096688:mmu-miR-1a-3p,ENSMUSG00000096688:mmu-let-7i-5p,ENSMUSG00000027712:mmu-miR-1a-3p,ENSMUSG00000094793:mmu-miR-1a-3p,ENSMUSG00000024401:mmu-miR-19a-3p,ENSMUSG00000030557:mmu-miR-1a-3p,ENSMUSG00000078673:mmu-miR-1a-3p,ENSMUSG00000073834:mmu-miR-1a-3p,ENSMUSG00000073834:mmu-let-7i-5p,ENSMUSG00000031930:mmu-miR-25-3p,EN…
Biological Process	GO:0006996	organelle organization	122	7455	1.09862e-05	0.000143418	ENSMUSG00000025777:mmu-miR-451a,ENSMUSG00000090714:mmu-miR-1b-5p,ENSMUSG00000032589:mmu-miR-144-3p,ENSMUSG00000032589:mmu-miR-1b-5p,ENSMUSG00000072980:mmu-miR-1b-5p,ENSMUSG00000004099:mmu-miR-126a-3p,ENSMUSG00000032035:mmu-miR-1a-3p,ENSMUSG00000061665:mmu-miR-142a-3p,ENSMUSG00000027104:mmu-miR-1b-5p,ENSMUSG00000027104:mmu-miR-451a,ENSMUSG00000002111:mmu-miR-126a-3p,ENSMUSG00000078673:mmu-miR-1a-3…
Biological Process	GO:0003093	regulation of glomerular filtration	4	13	1.11262e-05	0.000144769	ENSMUSG00000057123:mmu-miR-144-3p,ENSMUSG00000050953:mmu-miR-1a-3p,ENSMUSG00000030223:mmu-miR-1903,ENSMUSG00000022505:mmu-miR-1903
Biological Process	GO:1901342	regulation of vasculature development	18	474	1.11214e-05	0.000144769	ENSMUSG00000090935:mmu-miR-1903,ENSMUSG00000066551:mmu-miR-142a-3p,ENSMUSG00000021109:mmu-miR-144-3p,ENSMUSG00000020542:mmu-miR-1a-3p,ENSMUSG00000030525:mmu-miR-19a-3p,ENSMUSG00000028086:mmu-miR-25-3p,ENSMUSG00000023951:mmu-miR-16-5p,ENSMUSG00000023951:mmu-miR-126a-3p,ENSMUSG00000037225:mmu-miR-16-5p,ENSMUSG00000022505:mmu-miR-1903,ENSMUSG00000040289:mmu-miR-451a,ENSMUSG00000036144:mmu-miR-1a-3p,…
Biological Process	GO:1902589	single-organism organelle organization	55	2629	1.11886e-05	0.000145342	ENSMUSG00000025777:mmu-miR-451a,ENSMUSG00000027273:mmu-miR-19a-3p,ENSMUSG00000061665:mmu-miR-142a-3p,ENSMUSG00000046314:mmu-miR-1b-5p,ENSMUSG00000022346:mmu-miR-451a,ENSMUSG00000027104:mmu-miR-1b-5p,ENSMUSG00000027104:mmu-miR-451a,ENSMUSG00000078673:mmu-miR-1a-3p,ENSMUSG00000015605:mmu-miR-1a-3p,ENSMUSG00000021288:mmu-miR-16-5p,ENSMUSG00000004319:mmu-miR-1a-3p,ENSMUSG00000028165:mmu-miR-1b-5p,ENS…
Biological Process	GO:0045639	positive regulation of myeloid cell differentiation	11	187	1.15763e-05	0.000150132	ENSMUSG00000052155:mmu-miR-1b-5p,ENSMUSG00000052684:mmu-miR-16-5p,ENSMUSG00000032035:mmu-miR-1a-3p,ENSMUSG00000027276:mmu-miR-16-5p,ENSMUSG00000026029:mmu-miR-1b-5p,ENSMUSG00000027164:mmu-miR-144-3p,ENSMUSG00000028717:mmu-miR-126a-3p,ENSMUSG00000021109:mmu-miR-144-3p,ENSMUSG00000066551:mmu-miR-142a-3p,ENSMUSG00000024401:mmu-miR-19a-3p,ENSMUSG00000022952:mmu-miR-126a-3p
Biological Process	GO:0043542	endothelial cell migration	15	343	1.17259e-05	0.000151823	ENSMUSG00000015605:mmu-miR-1a-3p,ENSMUSG00000066551:mmu-miR-142a-3p,ENSMUSG00000036144:mmu-miR-1a-3p,ENSMUSG00000028517:mmu-miR-16-5p,ENSMUSG00000013663:mmu-miR-19a-3p,ENSMUSG00000013663:mmu-miR-19a-3p,ENSMUSG00000013663:mmu-miR-144-3p,ENSMUSG00000090935:mmu-miR-1903,ENSMUSG00000022505:mmu-miR-1903,ENSMUSG00000037225:mmu-miR-16-5p,ENSMUSG00000032035:mmu-miR-1a-3p,ENSMUSG00000003032:mmu-miR-1a-3p,…
Molecular Function	GO:0046983	protein dimerization activity	52	2438	1.18197e-05	0.000152788	ENSMUSG00000030350:mmu-miR-1b-5p,ENSMUSG00000048540:mmu-miR-1903,ENSMUSG00000023951:mmu-miR-16-5p,ENSMUSG00000023951:mmu-miR-126a-3p,ENSMUSG00000040752:mmu-miR-1a-3p,ENSMUSG00000023050:mmu-miR-19a-3p,ENSMUSG00000054263:mmu-miR-144-3p,ENSMUSG00000025980:mmu-miR-1a-3p,ENSMUSG00000041120:mmu-miR-1903,ENSMUSG00000020838:mmu-miR-16-5p,ENSMUSG00000028717:mmu-miR-126a-3p,ENSMUSG00000022528:mmu-miR-1a-3p…
Biological Process	GO:0007622	rhythmic behavior	9	122	1.20278e-05	0.000154721	ENSMUSG00000013663:mmu-miR-19a-3p,ENSMUSG00000013663:mmu-miR-19a-3p,ENSMUSG00000013663:mmu-miR-144-3p,ENSMUSG00000073830:mmu-miR-1a-3p,ENSMUSG00000078673:mmu-miR-1a-3p,ENSMUSG00000073834:mmu-miR-1a-3p,ENSMUSG00000073834:mmu-let-7i-5p,ENSMUSG00000096688:mmu-miR-1a-3p,ENSMUSG00000096688:mmu-let-7i-5p,ENSMUSG00000062202:mmu-miR-1903,ENSMUSG00000094793:mmu-miR-1a-3p,ENSMUSG00000078680:mmu-miR-1a-3p,E…
Biological Process	GO:0046676	negative regulation of insulin secretion	9	122	1.20278e-05	0.000154721	ENSMUSG00000096688:mmu-miR-1a-3p,ENSMUSG00000096688:mmu-let-7i-5p,ENSMUSG00000094793:mmu-miR-1a-3p,ENSMUSG00000078673:mmu-miR-1a-3p,ENSMUSG00000073834:mmu-miR-1a-3p,ENSMUSG00000073834:mmu-let-7i-5p,ENSMUSG00000030557:mmu-miR-1a-3p,ENSMUSG00000073830:mmu-miR-1a-3p,ENSMUSG00000033685:mmu-miR-1a-3p,ENSMUSG00000055980:mmu-miR-126a-3p,ENSMUSG00000078680:mmu-miR-1a-3p
Biological Process	GO:0048864	stem cell development	9	122	1.20278e-05	0.000154721	ENSMUSG00000026193:mmu-miR-1a-3p,ENSMUSG00000026193:mmu-miR-140-3p,ENSMUSG00000027276:mmu-miR-16-5p,ENSMUSG00000037225:mmu-miR-16-5p,ENSMUSG00000004872:mmu-miR-1a-3p,ENSMUSG00000069769:mmu-let-7i-5p,ENSMUSG00000038193:mmu-miR-1a-3p,ENSMUSG00000021109:mmu-miR-144-3p,ENSMUSG00000022528:mmu-miR-1a-3p,ENSMUSG00000019647:mmu-miR-142a-3p
Cellular Component	GO:0030424	axon	26	878	1.20783e-05	0.000155119	ENSMUSG00000022762:mmu-miR-25-3p,ENSMUSG00000030525:mmu-miR-19a-3p,ENSMUSG00000023050:mmu-miR-19a-3p,ENSMUSG00000032076:mmu-miR-16-5p,ENSMUSG00000024302:mmu-miR-1b-5p,ENSMUSG00000005580:mmu-miR-142a-3p,ENSMUSG00000005533:mmu-miR-1a-3p,ENSMUSG00000017652:mmu-miR-16-5p,ENSMUSG00000021109:mmu-miR-144-3p,ENSMUSG00000022346:mmu-miR-451a,ENSMUSG00000031144:mmu-miR-451a,ENSMUSG00000023033:mmu-miR-451a,E…
Biological Process	GO:0060249	anatomical structure homeostasis	21	622	1.25274e-05	0.000160626	ENSMUSG00000057329:mmu-miR-16-5p,ENSMUSG00000006678:mmu-miR-1a-3p,ENSMUSG00000025746:mmu-let-7i-5p,ENSMUSG00000025746:mmu-miR-142a-3p,ENSMUSG00000090714:mmu-miR-1b-5p,ENSMUSG00000022346:mmu-miR-451a,ENSMUSG00000020532:mmu-miR-451a,ENSMUSG00000027087:mmu-miR-16-5p,ENSMUSG00000019699:mmu-miR-451a,ENSMUSG00000030201:mmu-miR-19a-3p,ENSMUSG00000004319:mmu-miR-1a-3p,ENSMUSG00000002068:mmu-miR-16-5p,ENS…
Biological Process	GO:0043065	positive regulation of apoptotic process	31	1156	1.25983e-05	0.000161275	ENSMUSG00000048482:mmu-miR-1a-3p,ENSMUSG00000017491:mmu-miR-1a-3p,ENSMUSG00000030201:mmu-miR-19a-3p,ENSMUSG00000013663:mmu-miR-19a-3p,ENSMUSG00000013663:mmu-miR-19a-3p,ENSMUSG00000013663:mmu-miR-144-3p,ENSMUSG00000033658:mmu-miR-16-5p,ENSMUSG00000033658:mmu-miR-451a,ENSMUSG00000022285:mmu-miR-451a,ENSMUSG00000052684:mmu-miR-16-5p,ENSMUSG00000025746:mmu-let-7i-5p,ENSMUSG00000025746:mmu-miR-142a-3p…
Biological Process	GO:0021537	telencephalon development	17	433	1.27073e-05	0.000162408	ENSMUSG00000005533:mmu-miR-1a-3p,ENSMUSG00000020423:mmu-miR-25-3p,ENSMUSG00000022528:mmu-miR-1a-3p,ENSMUSG00000009900:mmu-miR-16-5p,ENSMUSG00000021109:mmu-miR-144-3p,ENSMUSG00000048251:mmu-miR-16-5p,ENSMUSG00000013663:mmu-miR-19a-3p,ENSMUSG00000013663:mmu-miR-19a-3p,ENSMUSG00000013663:mmu-miR-144-3p,ENSMUSG00000009073:mmu-let-7i-5p,ENSMUSG00000015605:mmu-miR-1a-3p,ENSMUSG00000005958:mmu-miR-1b-5p…
Biological Process	GO:0007368	determination of left/right symmetry	10	155	1.29693e-05	0.000165223	ENSMUSG00000024563:mmu-miR-140-3p,ENSMUSG00000052155:mmu-miR-1b-5p,ENSMUSG00000038193:mmu-miR-1a-3p,ENSMUSG00000054611:mmu-miR-19a-3p,ENSMUSG00000050953:mmu-miR-1a-3p,ENSMUSG00000030201:mmu-miR-19a-3p,ENSMUSG00000021109:mmu-miR-144-3p,ENSMUSG00000021944:mmu-miR-1a-3p,ENSMUSG00000015605:mmu-miR-1a-3p,ENSMUSG00000009900:mmu-miR-16-5p
Biological Process	GO:0045475	locomotor rhythm	7	68	1.29682e-05	0.000165223	ENSMUSG00000078673:mmu-miR-1a-3p,ENSMUSG00000073834:mmu-miR-1a-3p,ENSMUSG00000073834:mmu-let-7i-5p,ENSMUSG00000094793:mmu-miR-1a-3p,ENSMUSG00000096688:mmu-miR-1a-3p,ENSMUSG00000096688:mmu-let-7i-5p,ENSMUSG00000078680:mmu-miR-1a-3p,ENSMUSG00000073830:mmu-miR-1a-3p,ENSMUSG00000013663:mmu-miR-19a-3p,ENSMUSG00000013663:mmu-miR-19a-3p,ENSMUSG00000013663:mmu-miR-144-3p
Biological Process	GO:0010675	regulation of cellular carbohydrate metabolic process	14	305	1.33457e-05	0.000169745	ENSMUSG00000026313:mmu-miR-1a-3p,ENSMUSG00000096688:mmu-miR-1a-3p,ENSMUSG00000096688:mmu-let-7i-5p,ENSMUSG00000094793:mmu-miR-1a-3p,ENSMUSG00000078673:mmu-miR-1a-3p,ENSMUSG00000073834:mmu-miR-1a-3p,ENSMUSG00000073834:mmu-let-7i-5p,ENSMUSG00000066551:mmu-miR-142a-3p,ENSMUSG00000050697:mmu-miR-144-3p,ENSMUSG00000050697:mmu-miR-451a,ENSMUSG00000021109:mmu-miR-144-3p,ENSMUSG00000062908:mmu-miR-19a-3p…
Biological Process	GO:0045765	regulation of angiogenesis	15	348	1.38994e-05	0.000176505	ENSMUSG00000030525:mmu-miR-19a-3p,ENSMUSG00000023951:mmu-miR-16-5p,ENSMUSG00000023951:mmu-miR-126a-3p,ENSMUSG00000021256:mmu-miR-1903,ENSMUSG00000028086:mmu-miR-25-3p,ENSMUSG00000037225:mmu-miR-16-5p,ENSMUSG00000032035:mmu-miR-1a-3p,ENSMUSG00000003032:mmu-miR-1a-3p,ENSMUSG00000090935:mmu-miR-1903,ENSMUSG00000022505:mmu-miR-1903,ENSMUSG00000021109:mmu-miR-144-3p,ENSMUSG00000021944:mmu-miR-1a-3p,EN…
Biological Process	GO:0043068	positive regulation of programmed cell death	31	1163	1.41548e-05	0.000179461	ENSMUSG00000059921:mmu-miR-144-3p,ENSMUSG00000026313:mmu-miR-1a-3p,ENSMUSG00000016496:mmu-miR-16-5p,ENSMUSG00000024401:mmu-miR-19a-3p,ENSMUSG00000027712:mmu-miR-1a-3p,ENSMUSG00000044647:mmu-miR-1b-5p,ENSMUSG00000066551:mmu-miR-142a-3p,ENSMUSG00000009900:mmu-miR-16-5p,ENSMUSG00000021109:mmu-miR-144-3p,ENSMUSG00000006699:mmu-miR-1a-3p,ENSMUSG00000039005:mmu-miR-1b-5p,ENSMUSG00000025980:mmu-miR-1a-3…
Biological Process	GO:0006810	transport	137	8665	1.45114e-05	0.000183688	ENSMUSG00000022967:mmu-let-7i-5p,ENSMUSG00000050697:mmu-miR-144-3p,ENSMUSG00000050697:mmu-miR-451a,ENSMUSG00000027164:mmu-miR-144-3p,ENSMUSG00000041616:mmu-miR-1a-3p,ENSMUSG00000090877:mmu-miR-1a-3p,ENSMUSG00000031392:mmu-miR-142a-3p,ENSMUSG00000028495:mmu-miR-1a-3p,ENSMUSG00000024563:mmu-miR-140-3p,ENSMUSG00000094793:mmu-miR-1a-3p,ENSMUSG00000000560:mmu-miR-1b-5p,ENSMUSG00000033658:mmu-miR-16-5p…
Biological Process	GO:0007005	mitochondrion organization	31	1165	1.46308e-05	0.000184315	ENSMUSG00000020053:mmu-miR-1a-3p,ENSMUSG00000034957:mmu-miR-144-3p,ENSMUSG00000027104:mmu-miR-1b-5p,ENSMUSG00000027104:mmu-miR-451a,ENSMUSG00000022346:mmu-miR-451a,ENSMUSG00000052684:mmu-miR-16-5p,ENSMUSG00000025777:mmu-miR-451a,ENSMUSG00000057329:mmu-miR-16-5p,ENSMUSG00000029104:mmu-miR-1b-5p,ENSMUSG00000020593:mmu-miR-1903,ENSMUSG00000022285:mmu-miR-451a,ENSMUSG00000030557:mmu-miR-1a-3p,ENSMUSG…
Biological Process	GO:0033564	anterior/posterior axon guidance	3	5	1.46157e-05	0.000184315	ENSMUSG00000020099:mmu-miR-1b-5p,ENSMUSG00000060534:mmu-miR-1903,ENSMUSG00000059921:mmu-miR-144-3p
Biological Process	GO:0038007	netrin-activated signaling pathway	3	5	1.46157e-05	0.000184315	ENSMUSG00000059921:mmu-miR-144-3p,ENSMUSG00000020099:mmu-miR-1b-5p,ENSMUSG00000060534:mmu-miR-1903
Biological Process	GO:1905952	regulation of lipid localization	14	308	1.48853e-05	0.000187224	ENSMUSG00000073834:mmu-miR-1a-3p,ENSMUSG00000073834:mmu-let-7i-5p,ENSMUSG00000078673:mmu-miR-1a-3p,ENSMUSG00000022952:mmu-miR-126a-3p,ENSMUSG00000096688:mmu-miR-1a-3p,ENSMUSG00000096688:mmu-let-7i-5p,ENSMUSG00000094793:mmu-miR-1a-3p,ENSMUSG00000031392:mmu-miR-142a-3p,ENSMUSG00000073830:mmu-miR-1a-3p,ENSMUSG00000003452:mmu-miR-16-5p,ENSMUSG00000015243:mmu-miR-144-3p,ENSMUSG00000061665:mmu-miR-142a…
Biological Process	GO:0051234	establishment of localization	140	8906	1.49343e-05	0.000187543	ENSMUSG00000021700:mmu-miR-1903,ENSMUSG00000030744:mmu-miR-1b-5p,ENSMUSG00000028086:mmu-miR-25-3p,ENSMUSG00000078680:mmu-miR-1a-3p,ENSMUSG00000030525:mmu-miR-19a-3p,ENSMUSG00000031327:mmu-miR-1b-5p,ENSMUSG00000009900:mmu-miR-16-5p,ENSMUSG00000038602:mmu-miR-19a-3p,ENSMUSG00000026251:mmu-miR-19a-3p,ENSMUSG00000050017:mmu-miR-1b-5p,ENSMUSG00000036438:mmu-miR-1a-3p,ENSMUSG00000027852:mmu-miR-1b-5p,E…
Biological Process	GO:0014812	muscle cell migration	10	158	1.53288e-05	0.000192192	ENSMUSG00000021756:mmu-miR-142a-3p,ENSMUSG00000033792:mmu-miR-1b-5p,ENSMUSG00000026313:mmu-miR-1a-3p,ENSMUSG00000066551:mmu-miR-142a-3p,ENSMUSG00000022346:mmu-miR-451a,ENSMUSG00000033307:mmu-miR-451a,ENSMUSG00000020053:mmu-miR-1a-3p,ENSMUSG00000050953:mmu-miR-1a-3p,ENSMUSG00000030084:mmu-miR-1b-5p,ENSMUSG00000057329:mmu-miR-16-5p
Biological Process	GO:0051301	cell division	28	1000	1.54903e-05	0.0001933	ENSMUSG00000065954:mmu-miR-16-5p,ENSMUSG00000027715:mmu-miR-1b-5p,ENSMUSG00000072980:mmu-miR-1b-5p,ENSMUSG00000036438:mmu-miR-1a-3p,ENSMUSG00000061665:mmu-miR-142a-3p,ENSMUSG00000022346:mmu-miR-451a,ENSMUSG00000041075:mmu-miR-1a-3p,ENSMUSG00000041075:mmu-miR-126a-3p,ENSMUSG00000001175:mmu-miR-1a-3p,ENSMUSG00000030201:mmu-miR-19a-3p,ENSMUSG00000021549:mmu-miR-1a-3p,ENSMUSG00000045515:mmu-miR-140-3…
Biological Process	GO:0070997	neuron death	28	1000	1.54903e-05	0.0001933	ENSMUSG00000020423:mmu-miR-25-3p,ENSMUSG00000025980:mmu-miR-1a-3p,ENSMUSG00000027993:mmu-miR-16-5p,ENSMUSG00000006699:mmu-miR-1a-3p,ENSMUSG00000026313:mmu-miR-1a-3p,ENSMUSG00000033792:mmu-miR-1b-5p,ENSMUSG00000024401:mmu-miR-19a-3p,ENSMUSG00000021109:mmu-miR-144-3p,ENSMUSG00000023951:mmu-miR-16-5p,ENSMUSG00000023951:mmu-miR-126a-3p,ENSMUSG00000028086:mmu-miR-25-3p,ENSMUSG00000023050:mmu-miR-19a-3…
Cellular Component	GO:0009986	cell surface	36	1460	1.54624e-05	0.0001933	ENSMUSG00000015243:mmu-miR-144-3p,ENSMUSG00000023951:mmu-miR-16-5p,ENSMUSG00000023951:mmu-miR-126a-3p,ENSMUSG00000033307:mmu-miR-451a,ENSMUSG00000026234:mmu-miR-16-5p,ENSMUSG00000049791:mmu-miR-19a-3p,ENSMUSG00000016496:mmu-miR-16-5p,ENSMUSG00000063626:mmu-miR-1903,ENSMUSG00000025980:mmu-miR-1a-3p,ENSMUSG00000017652:mmu-miR-16-5p,ENSMUSG00000039005:mmu-miR-1b-5p,ENSMUSG00000090935:mmu-miR-1903,EN…
Molecular Function	GO:0005009	insulin-activated receptor activity	6	47	1.56215e-05	0.00019463	ENSMUSG00000073830:mmu-miR-1a-3p,ENSMUSG00000078680:mmu-miR-1a-3p,ENSMUSG00000096688:mmu-miR-1a-3p,ENSMUSG00000096688:mmu-let-7i-5p,ENSMUSG00000094793:mmu-miR-1a-3p,ENSMUSG00000073834:mmu-miR-1a-3p,ENSMUSG00000073834:mmu-let-7i-5p,ENSMUSG00000078673:mmu-miR-1a-3p
Biological Process	GO:0010611	regulation of cardiac muscle hypertrophy	7	70	1.57245e-05	0.0001953	ENSMUSG00000028967:mmu-miR-126a-3p,ENSMUSG00000020053:mmu-miR-1a-3p,ENSMUSG00000038193:mmu-miR-1a-3p,ENSMUSG00000009555:mmu-miR-1a-3p,ENSMUSG00000030557:mmu-miR-1a-3p,ENSMUSG00000021756:mmu-miR-142a-3p,ENSMUSG00000027716:mmu-miR-451a
Biological Process	GO:0048641	regulation of skeletal muscle tissue development	7	70	1.57245e-05	0.0001953	ENSMUSG00000050697:mmu-miR-144-3p,ENSMUSG00000050697:mmu-miR-451a,ENSMUSG00000009900:mmu-miR-16-5p,ENSMUSG00000057329:mmu-miR-16-5p,ENSMUSG00000026313:mmu-miR-1a-3p,ENSMUSG00000027852:mmu-miR-1b-5p,ENSMUSG00000020542:mmu-miR-1a-3p,ENSMUSG00000055116:mmu-miR-142a-3p
Cellular Component	GO:0005886	plasma membrane	138	8758	1.5822e-05	0.000196203	ENSMUSG00000030525:mmu-miR-19a-3p,ENSMUSG00000021700:mmu-miR-1903,ENSMUSG00000030744:mmu-miR-1b-5p,ENSMUSG00000020272:mmu-miR-25-3p,ENSMUSG00000030156:mmu-miR-25-3p,ENSMUSG00000009900:mmu-miR-16-5p,ENSMUSG00000059921:mmu-miR-144-3p,ENSMUSG00000031327:mmu-miR-1b-5p,ENSMUSG00000036438:mmu-miR-1a-3p,ENSMUSG00000026251:mmu-miR-19a-3p,ENSMUSG00000044197:mmu-miR-1903,ENSMUSG00000028967:mmu-miR-126a-3p,…
Biological Process	GO:0010883	regulation of lipid storage	10	159	1.61932e-05	0.000200492	ENSMUSG00000073834:mmu-miR-1a-3p,ENSMUSG00000073834:mmu-let-7i-5p,ENSMUSG00000078673:mmu-miR-1a-3p,ENSMUSG00000094793:mmu-miR-1a-3p,ENSMUSG00000096688:mmu-miR-1a-3p,ENSMUSG00000096688:mmu-let-7i-5p,ENSMUSG00000073830:mmu-miR-1a-3p,ENSMUSG00000003452:mmu-miR-16-5p,ENSMUSG00000061665:mmu-miR-142a-3p,ENSMUSG00000078680:mmu-miR-1a-3p,ENSMUSG00000027087:mmu-miR-16-5p,ENSMUSG00000028086:mmu-miR-25-3p
Biological Process	GO:0034103	regulation of tissue remodeling	8	97	1.63205e-05	0.000201753	ENSMUSG00000021944:mmu-miR-1a-3p,ENSMUSG00000030201:mmu-miR-19a-3p,ENSMUSG00000025746:mmu-let-7i-5p,ENSMUSG00000025746:mmu-miR-142a-3p,ENSMUSG00000050953:mmu-miR-1a-3p,ENSMUSG00000023951:mmu-miR-16-5p,ENSMUSG00000023951:mmu-miR-126a-3p,ENSMUSG00000038193:mmu-miR-1a-3p,ENSMUSG00000029816:mmu-miR-1903,ENSMUSG00000027087:mmu-miR-16-5p
Biological Process	GO:0010942	positive regulation of cell death	32	1231	1.6837e-05	0.000207814	ENSMUSG00000025746:mmu-let-7i-5p,ENSMUSG00000025746:mmu-miR-142a-3p,ENSMUSG00000022346:mmu-miR-451a,ENSMUSG00000027104:mmu-miR-1b-5p,ENSMUSG00000027104:mmu-miR-451a,ENSMUSG00000017491:mmu-miR-1a-3p,ENSMUSG00000030201:mmu-miR-19a-3p,ENSMUSG00000013663:mmu-miR-19a-3p,ENSMUSG00000013663:mmu-miR-19a-3p,ENSMUSG00000013663:mmu-miR-144-3p,ENSMUSG00000026313:mmu-miR-1a-3p,ENSMUSG00000016496:mmu-miR-16-5p…
Biological Process	GO:0001775	cell activation	39	1648	1.70868e-05	0.000210568	ENSMUSG00000022528:mmu-miR-1a-3p,ENSMUSG00000020542:mmu-miR-1a-3p,ENSMUSG00000016496:mmu-miR-16-5p,ENSMUSG00000033792:mmu-miR-1b-5p,ENSMUSG00000017652:mmu-miR-16-5p,ENSMUSG00000025980:mmu-miR-1a-3p,ENSMUSG00000039005:mmu-miR-1b-5p,ENSMUSG00000026193:mmu-miR-1a-3p,ENSMUSG00000026193:mmu-miR-140-3p,ENSMUSG00000028136:mmu-miR-19a-3p,ENSMUSG00000028136:mmu-miR-1b-5p,ENSMUSG00000033307:mmu-miR-451a,EN…
Biological Process	GO:0043524	negative regulation of neuron apoptotic process	14	313	1.78015e-05	0.000219036	ENSMUSG00000029104:mmu-miR-1b-5p,ENSMUSG00000057329:mmu-miR-16-5p,ENSMUSG00000023050:mmu-miR-19a-3p,ENSMUSG00000020099:mmu-miR-1b-5p,ENSMUSG00000052684:mmu-miR-16-5p,ENSMUSG00000023951:mmu-miR-16-5p,ENSMUSG00000023951:mmu-miR-126a-3p,ENSMUSG00000021549:mmu-miR-1a-3p,ENSMUSG00000033792:mmu-miR-1b-5p,ENSMUSG00000021109:mmu-miR-144-3p,ENSMUSG00000027665:mmu-miR-1b-5p,ENSMUSG00000048482:mmu-miR-1a-3p…
Biological Process	GO:0003299	muscle hypertrophy in response to stress	5	29	1.81203e-05	0.000221925	ENSMUSG00000040752:mmu-miR-1a-3p,ENSMUSG00000021944:mmu-miR-1a-3p,ENSMUSG00000027716:mmu-miR-451a,ENSMUSG00000041616:mmu-miR-1a-3p,ENSMUSG00000028967:mmu-miR-126a-3p
Biological Process	GO:0014898	cardiac muscle hypertrophy in response to stress	5	29	1.81203e-05	0.000221925	ENSMUSG00000028967:mmu-miR-126a-3p,ENSMUSG00000041616:mmu-miR-1a-3p,ENSMUSG00000027716:mmu-miR-451a,ENSMUSG00000021944:mmu-miR-1a-3p,ENSMUSG00000040752:mmu-miR-1a-3p
Biological Process	GO:0035886	vascular smooth muscle cell differentiation	5	29	1.81203e-05	0.000221925	ENSMUSG00000023951:mmu-miR-16-5p,ENSMUSG00000023951:mmu-miR-126a-3p,ENSMUSG00000024921:mmu-miR-142a-3p,ENSMUSG00000020542:mmu-miR-1a-3p,ENSMUSG00000015605:mmu-miR-1a-3p,ENSMUSG00000022528:mmu-miR-1a-3p
Biological Process	GO:0007155	cell adhesion	58	2877	1.85513e-05	0.000226852	ENSMUSG00000016664:mmu-miR-16-5p,ENSMUSG00000041075:mmu-miR-1a-3p,ENSMUSG00000041075:mmu-miR-126a-3p,ENSMUSG00000027087:mmu-miR-16-5p,ENSMUSG00000020053:mmu-miR-1a-3p,ENSMUSG00000003032:mmu-miR-1a-3p,ENSMUSG00000026012:mmu-miR-1b-5p,ENSMUSG00000057329:mmu-miR-16-5p,ENSMUSG00000000402:mmu-miR-142a-3p,ENSMUSG00000022285:mmu-miR-451a,ENSMUSG00000039953:mmu-miR-451a,ENSMUSG00000020315:mmu-miR-144-3p,…
Biological Process	GO:0014743	regulation of muscle hypertrophy	7	72	1.89479e-05	0.000231346	ENSMUSG00000038193:mmu-miR-1a-3p,ENSMUSG00000020053:mmu-miR-1a-3p,ENSMUSG00000028967:mmu-miR-126a-3p,ENSMUSG00000021756:mmu-miR-142a-3p,ENSMUSG00000027716:mmu-miR-451a,ENSMUSG00000030557:mmu-miR-1a-3p,ENSMUSG00000009555:mmu-miR-1a-3p
Biological Process	GO:0018108	peptidyl-tyrosine phosphorylation	17	447	1.90733e-05	0.000232519	ENSMUSG00000022892:mmu-miR-16-5p,ENSMUSG00000028967:mmu-miR-126a-3p,ENSMUSG00000021549:mmu-miR-1a-3p,ENSMUSG00000005958:mmu-miR-1b-5p,ENSMUSG00000020053:mmu-miR-1a-3p,ENSMUSG00000025746:mmu-let-7i-5p,ENSMUSG00000025746:mmu-miR-142a-3p,ENSMUSG00000005533:mmu-miR-1a-3p,ENSMUSG00000039005:mmu-miR-1b-5p,ENSMUSG00000028517:mmu-miR-16-5p,ENSMUSG00000022967:mmu-let-7i-5p,ENSMUSG00000031483:mmu-miR-16-5p…
Cellular Component	GO:0071944	cell periphery	140	8948	1.91646e-05	0.000233272	ENSMUSG00000006678:mmu-miR-1a-3p,ENSMUSG00000029104:mmu-miR-1b-5p,ENSMUSG00000030465:mmu-miR-1b-5p,ENSMUSG00000027087:mmu-miR-16-5p,ENSMUSG00000019647:mmu-miR-142a-3p,ENSMUSG00000000560:mmu-miR-1b-5p,ENSMUSG00000008590:mmu-miR-1903,ENSMUSG00000032413:mmu-miR-1b-5p,ENSMUSG00000039953:mmu-miR-451a,ENSMUSG00000036099:mmu-miR-451a,ENSMUSG00000050697:mmu-miR-144-3p,ENSMUSG00000050697:mmu-miR-451a,ENSM…
Biological Process	GO:0045321	leukocyte activation	35	1417	1.9655e-05	0.000238874	ENSMUSG00000054387:mmu-miR-16-5p,ENSMUSG00000066551:mmu-miR-142a-3p,ENSMUSG00000009900:mmu-miR-16-5p,ENSMUSG00000059921:mmu-miR-144-3p,ENSMUSG00000022967:mmu-let-7i-5p,ENSMUSG00000006699:mmu-miR-1a-3p,ENSMUSG00000023206:mmu-miR-1b-5p,ENSMUSG00000038696:mmu-miR-16-5p,ENSMUSG00000027164:mmu-miR-144-3p,ENSMUSG00000028495:mmu-miR-1a-3p,ENSMUSG00000048251:mmu-miR-16-5p,ENSMUSG00000030525:mmu-miR-19a-3…
Biological Process	GO:0044087	regulation of cellular component biogenesis	35	1418	1.9943e-05	0.000242003	ENSMUSG00000023951:mmu-miR-16-5p,ENSMUSG00000023951:mmu-miR-126a-3p,ENSMUSG00000036533:mmu-miR-144-3p,ENSMUSG00000042203:mmu-miR-1b-5p,ENSMUSG00000050953:mmu-miR-1a-3p,ENSMUSG00000026234:mmu-miR-16-5p,ENSMUSG00000028717:mmu-miR-126a-3p,ENSMUSG00000039005:mmu-miR-1b-5p,ENSMUSG00000070867:mmu-miR-1903,ENSMUSG00000033792:mmu-miR-1b-5p,ENSMUSG00000026313:mmu-miR-1a-3p,ENSMUSG00000031834:mmu-miR-126a-…
Biological Process	GO:0010888	negative regulation of lipid storage	9	130	2.0039e-05	0.000242797	ENSMUSG00000073834:mmu-miR-1a-3p,ENSMUSG00000073834:mmu-let-7i-5p,ENSMUSG00000078673:mmu-miR-1a-3p,ENSMUSG00000096688:mmu-miR-1a-3p,ENSMUSG00000096688:mmu-let-7i-5p,ENSMUSG00000094793:mmu-miR-1a-3p,ENSMUSG00000073830:mmu-miR-1a-3p,ENSMUSG00000003452:mmu-miR-16-5p,ENSMUSG00000078680:mmu-miR-1a-3p,ENSMUSG00000061665:mmu-miR-142a-3p,ENSMUSG00000027087:mmu-miR-16-5p
Biological Process	GO:0018212	peptidyl-tyrosine modification	17	449	2.01837e-05	0.000244176	ENSMUSG00000021549:mmu-miR-1a-3p,ENSMUSG00000005958:mmu-miR-1b-5p,ENSMUSG00000022892:mmu-miR-16-5p,ENSMUSG00000028967:mmu-miR-126a-3p,ENSMUSG00000025746:mmu-let-7i-5p,ENSMUSG00000025746:mmu-miR-142a-3p,ENSMUSG00000020053:mmu-miR-1a-3p,ENSMUSG00000031483:mmu-miR-16-5p,ENSMUSG00000002748:mmu-miR-1903,ENSMUSG00000028517:mmu-miR-16-5p,ENSMUSG00000022967:mmu-let-7i-5p,ENSMUSG00000009900:mmu-miR-16-5p,…
Biological Process	GO:0071300	cellular response to retinoic acid	8	100	2.03982e-05	0.000246396	ENSMUSG00000020838:mmu-miR-16-5p,ENSMUSG00000039005:mmu-miR-1b-5p,ENSMUSG00000049791:mmu-miR-19a-3p,ENSMUSG00000029661:mmu-let-7i-5p,ENSMUSG00000022346:mmu-miR-451a,ENSMUSG00000038193:mmu-miR-1a-3p,ENSMUSG00000015243:mmu-miR-144-3p,ENSMUSG00000003032:mmu-miR-1a-3p
Biological Process	GO:0018193	peptidyl-amino acid modification	54	2620	2.04642e-05	0.000246817	ENSMUSG00000025746:mmu-let-7i-5p,ENSMUSG00000025746:mmu-miR-142a-3p,ENSMUSG00000004099:mmu-miR-126a-3p,ENSMUSG00000036745:mmu-miR-1903,ENSMUSG00000027104:mmu-miR-1b-5p,ENSMUSG00000027104:mmu-miR-451a,ENSMUSG00000002111:mmu-miR-126a-3p,ENSMUSG00000019699:mmu-miR-451a,ENSMUSG00000039958:mmu-miR-1b-5p,ENSMUSG00000022505:mmu-miR-1903,ENSMUSG00000022892:mmu-miR-16-5p,ENSMUSG00000023050:mmu-miR-19a-3p,…
Biological Process	GO:0009617	response to bacterium	30	1130	2.101e-05	0.000253014	ENSMUSG00000037523:mmu-miR-1b-5p,ENSMUSG00000033307:mmu-miR-451a,ENSMUSG00000025586:mmu-miR-1a-3p,ENSMUSG00000025586:mmu-miR-25-3p,ENSMUSG00000050953:mmu-miR-1a-3p,ENSMUSG00000026234:mmu-miR-16-5p,ENSMUSG00000042845:mmu-miR-1b-5p,ENSMUSG00000026029:mmu-miR-1b-5p,ENSMUSG00000045362:mmu-let-7i-5p,ENSMUSG00000026193:mmu-miR-1a-3p,ENSMUSG00000026193:mmu-miR-140-3p,ENSMUSG00000015243:mmu-miR-144-3p,EN…
Biological Process	GO:0060419	heart growth	9	131	2.13029e-05	0.000256151	ENSMUSG00000013663:mmu-miR-19a-3p,ENSMUSG00000013663:mmu-miR-19a-3p,ENSMUSG00000013663:mmu-miR-144-3p,ENSMUSG00000041616:mmu-miR-1a-3p,ENSMUSG00000022306:mmu-miR-19a-3p,ENSMUSG00000021944:mmu-miR-1a-3p,ENSMUSG00000020542:mmu-miR-1a-3p,ENSMUSG00000020053:mmu-miR-1a-3p,ENSMUSG00000050953:mmu-miR-1a-3p,ENSMUSG00000037225:mmu-miR-16-5p,ENSMUSG00000040752:mmu-miR-1a-3p
Biological Process	GO:0003171	atrioventricular valve development	5	30	2.15407e-05	0.00025862	ENSMUSG00000022306:mmu-miR-19a-3p,ENSMUSG00000021944:mmu-miR-1a-3p,ENSMUSG00000054387:mmu-miR-16-5p,ENSMUSG00000057123:mmu-miR-144-3p,ENSMUSG00000040289:mmu-miR-451a
Biological Process	GO:2000147	positive regulation of cell motility	24	801	2.16565e-05	0.000259615	ENSMUSG00000019647:mmu-miR-142a-3p,ENSMUSG00000021756:mmu-miR-142a-3p,ENSMUSG00000055980:mmu-miR-126a-3p,ENSMUSG00000031555:mmu-miR-126a-3p,ENSMUSG00000052684:mmu-miR-16-5p,ENSMUSG00000032035:mmu-miR-1a-3p,ENSMUSG00000057329:mmu-miR-16-5p,ENSMUSG00000020053:mmu-miR-1a-3p,ENSMUSG00000022346:mmu-miR-451a,ENSMUSG00000029816:mmu-miR-1903,ENSMUSG00000027087:mmu-miR-16-5p,ENSMUSG00000021109:mmu-miR-144…
Biological Process	GO:0007612	learning	12	238	2.19541e-05	0.000262786	ENSMUSG00000048482:mmu-miR-1a-3p,ENSMUSG00000015605:mmu-miR-1a-3p,ENSMUSG00000021109:mmu-miR-144-3p,ENSMUSG00000037541:mmu-miR-451a,ENSMUSG00000046876:mmu-miR-19a-3p,ENSMUSG00000020423:mmu-miR-25-3p,ENSMUSG00000022892:mmu-miR-16-5p,ENSMUSG00000052684:mmu-miR-16-5p,ENSMUSG00000027273:mmu-miR-19a-3p,ENSMUSG00000029104:mmu-miR-1b-5p,ENSMUSG00000027210:mmu-let-7i-5p,ENSMUSG00000030525:mmu-miR-19a-3p
Biological Process	GO:0022610	biological adhesion	58	2896	2.24022e-05	0.000267745	ENSMUSG00000022285:mmu-miR-451a,ENSMUSG00000039953:mmu-miR-451a,ENSMUSG00000000402:mmu-miR-142a-3p,ENSMUSG00000020315:mmu-miR-144-3p,ENSMUSG00000009073:mmu-let-7i-5p,ENSMUSG00000068299:mmu-miR-19a-3p,ENSMUSG00000021549:mmu-miR-1a-3p,ENSMUSG00000005958:mmu-miR-1b-5p,ENSMUSG00000041075:mmu-miR-1a-3p,ENSMUSG00000041075:mmu-miR-126a-3p,ENSMUSG00000027087:mmu-miR-16-5p,ENSMUSG00000016664:mmu-miR-16-5p…
Biological Process	GO:0048534	hematopoietic or lymphoid organ development	39	1671	2.32207e-05	0.00027711	ENSMUSG00000030744:mmu-miR-1b-5p,ENSMUSG00000026029:mmu-miR-1b-5p,ENSMUSG00000028495:mmu-miR-1a-3p,ENSMUSG00000048251:mmu-miR-16-5p,ENSMUSG00000054387:mmu-miR-16-5p,ENSMUSG00000066551:mmu-miR-142a-3p,ENSMUSG00000009900:mmu-miR-16-5p,ENSMUSG00000024401:mmu-miR-19a-3p,ENSMUSG00000006699:mmu-miR-1a-3p,ENSMUSG00000023206:mmu-miR-1b-5p,ENSMUSG00000027164:mmu-miR-144-3p,ENSMUSG00000052684:mmu-miR-16-5p…
Molecular Function	GO:0046982	protein heterodimerization activity	30	1137	2.35602e-05	0.000280738	ENSMUSG00000024563:mmu-miR-140-3p,ENSMUSG00000040752:mmu-miR-1a-3p,ENSMUSG00000054263:mmu-miR-144-3p,ENSMUSG00000026029:mmu-miR-1b-5p,ENSMUSG00000030350:mmu-miR-1b-5p,ENSMUSG00000049336:mmu-miR-451a,ENSMUSG00000023951:mmu-miR-16-5p,ENSMUSG00000023951:mmu-miR-126a-3p,ENSMUSG00000021109:mmu-miR-144-3p,ENSMUSG00000031834:mmu-miR-126a-3p,ENSMUSG00000049791:mmu-miR-19a-3p,ENSMUSG00000025980:mmu-miR-1a…
Biological Process	GO:0036294	cellular response to decreased oxygen levels	13	280	2.39865e-05	0.000285388	ENSMUSG00000023951:mmu-miR-16-5p,ENSMUSG00000023951:mmu-miR-126a-3p,ENSMUSG00000033307:mmu-miR-451a,ENSMUSG00000025586:mmu-miR-1a-3p,ENSMUSG00000025586:mmu-miR-25-3p,ENSMUSG00000057329:mmu-miR-16-5p,ENSMUSG00000027715:mmu-miR-1b-5p,ENSMUSG00000027490:mmu-miR-1b-5p,ENSMUSG00000013663:mmu-miR-19a-3p,ENSMUSG00000013663:mmu-miR-19a-3p,ENSMUSG00000013663:mmu-miR-144-3p,ENSMUSG00000031392:mmu-miR-142a-…
Cellular Component	GO:0043227	membrane-bounded organelle	291	21939	2.50056e-05	0.000297069	ENSMUSG00000026193:mmu-miR-1a-3p,ENSMUSG00000026193:mmu-miR-140-3p,ENSMUSG00000000001:mmu-miR-451a,ENSMUSG00000024921:mmu-miR-142a-3p,ENSMUSG00000051650:mmu-miR-1b-5p,ENSMUSG00000052656:mmu-miR-451a,ENSMUSG00000033792:mmu-miR-1b-5p,ENSMUSG00000042292:mmu-miR-1a-3p,ENSMUSG00000030302:mmu-let-7i-5p,ENSMUSG00000057446:mmu-let-7i-5p,ENSMUSG00000055980:mmu-miR-126a-3p,ENSMUSG00000034673:mmu-miR-1903,E…
Biological Process	GO:0014887	cardiac muscle adaptation	5	31	2.54428e-05	0.00030181	ENSMUSG00000040752:mmu-miR-1a-3p,ENSMUSG00000021944:mmu-miR-1a-3p,ENSMUSG00000027716:mmu-miR-451a,ENSMUSG00000041616:mmu-miR-1a-3p,ENSMUSG00000028967:mmu-miR-126a-3p
Biological Process	GO:0001657	ureteric bud development	9	134	2.55083e-05	0.000302135	ENSMUSG00000017491:mmu-miR-1a-3p,ENSMUSG00000048482:mmu-miR-1a-3p,ENSMUSG00000040289:mmu-miR-451a,ENSMUSG00000022528:mmu-miR-1a-3p,ENSMUSG00000023951:mmu-miR-16-5p,ENSMUSG00000023951:mmu-miR-126a-3p,ENSMUSG00000022346:mmu-miR-451a,ENSMUSG00000057329:mmu-miR-16-5p,ENSMUSG00000037225:mmu-miR-16-5p,ENSMUSG00000024563:mmu-miR-140-3p
Biological Process	GO:0051048	negative regulation of secretion	15	367	2.57768e-05	0.000304858	ENSMUSG00000073830:mmu-miR-1a-3p,ENSMUSG00000033685:mmu-miR-1a-3p,ENSMUSG00000024401:mmu-miR-19a-3p,ENSMUSG00000096688:mmu-miR-1a-3p,ENSMUSG00000096688:mmu-let-7i-5p,ENSMUSG00000094793:mmu-miR-1a-3p,ENSMUSG00000027712:mmu-miR-1a-3p,ENSMUSG00000073834:mmu-miR-1a-3p,ENSMUSG00000073834:mmu-let-7i-5p,ENSMUSG00000078673:mmu-miR-1a-3p,ENSMUSG00000030557:mmu-miR-1a-3p,ENSMUSG00000078680:mmu-miR-1a-3p,EN…
Biological Process	GO:0032526	response to retinoic acid	12	242	2.58651e-05	0.000305447	ENSMUSG00000015243:mmu-miR-144-3p,ENSMUSG00000003032:mmu-miR-1a-3p,ENSMUSG00000025777:mmu-miR-451a,ENSMUSG00000038193:mmu-miR-1a-3p,ENSMUSG00000022346:mmu-miR-451a,ENSMUSG00000050953:mmu-miR-1a-3p,ENSMUSG00000022952:mmu-miR-126a-3p,ENSMUSG00000049791:mmu-miR-19a-3p,ENSMUSG00000029661:mmu-let-7i-5p,ENSMUSG00000021944:mmu-miR-1a-3p,ENSMUSG00000039005:mmu-miR-1b-5p,ENSMUSG00000020838:mmu-miR-16-5p
Biological Process	GO:1905953	negative regulation of lipid localization	10	168	2.60529e-05	0.000307207	ENSMUSG00000003452:mmu-miR-16-5p,ENSMUSG00000061665:mmu-miR-142a-3p,ENSMUSG00000078680:mmu-miR-1a-3p,ENSMUSG00000027087:mmu-miR-16-5p,ENSMUSG00000078673:mmu-miR-1a-3p,ENSMUSG00000073834:mmu-miR-1a-3p,ENSMUSG00000073834:mmu-let-7i-5p,ENSMUSG00000096688:mmu-miR-1a-3p,ENSMUSG00000096688:mmu-let-7i-5p,ENSMUSG00000094793:mmu-miR-1a-3p,ENSMUSG00000073830:mmu-miR-1a-3p,ENSMUSG00000031392:mmu-miR-142a-3p
Biological Process	GO:0006629	lipid metabolic process	47	2185	2.61381e-05	0.000307298	ENSMUSG00000020532:mmu-miR-451a,ENSMUSG00000055980:mmu-miR-126a-3p,ENSMUSG00000038173:mmu-miR-144-3p,ENSMUSG00000013663:mmu-miR-19a-3p,ENSMUSG00000013663:mmu-miR-19a-3p,ENSMUSG00000013663:mmu-miR-144-3p,ENSMUSG00000022892:mmu-miR-16-5p,ENSMUSG00000020593:mmu-miR-1903,ENSMUSG00000078673:mmu-miR-1a-3p,ENSMUSG00000038641:mmu-miR-142a-3p,ENSMUSG00000021756:mmu-miR-142a-3p,ENSMUSG00000039958:mmu-miR-1…
Biological Process	GO:0033043	regulation of organelle organization	47	2185	2.61381e-05	0.000307298	ENSMUSG00000020593:mmu-miR-1903,ENSMUSG00000004099:mmu-miR-126a-3p,ENSMUSG00000046314:mmu-miR-1b-5p,ENSMUSG00000061665:mmu-miR-142a-3p,ENSMUSG00000022346:mmu-miR-451a,ENSMUSG00000002111:mmu-miR-126a-3p,ENSMUSG00000021109:mmu-miR-144-3p,ENSMUSG00000022528:mmu-miR-1a-3p,ENSMUSG00000031834:mmu-miR-126a-3p,ENSMUSG00000020542:mmu-miR-1a-3p,ENSMUSG00000005533:mmu-miR-1a-3p,ENSMUSG00000037259:mmu-miR-1b…
Biological Process	GO:0072163	mesonephric epithelium development	9	135	2.70581e-05	0.000317171	ENSMUSG00000017491:mmu-miR-1a-3p,ENSMUSG00000022528:mmu-miR-1a-3p,ENSMUSG00000048482:mmu-miR-1a-3p,ENSMUSG00000040289:mmu-miR-451a,ENSMUSG00000057329:mmu-miR-16-5p,ENSMUSG00000024563:mmu-miR-140-3p,ENSMUSG00000037225:mmu-miR-16-5p,ENSMUSG00000022346:mmu-miR-451a,ENSMUSG00000023951:mmu-miR-16-5p,ENSMUSG00000023951:mmu-miR-126a-3p
Biological Process	GO:0072164	mesonephric tubule development	9	135	2.70581e-05	0.000317171	ENSMUSG00000024563:mmu-miR-140-3p,ENSMUSG00000037225:mmu-miR-16-5p,ENSMUSG00000057329:mmu-miR-16-5p,ENSMUSG00000022346:mmu-miR-451a,ENSMUSG00000023951:mmu-miR-16-5p,ENSMUSG00000023951:mmu-miR-126a-3p,ENSMUSG00000022528:mmu-miR-1a-3p,ENSMUSG00000048482:mmu-miR-1a-3p,ENSMUSG00000040289:mmu-miR-451a,ENSMUSG00000017491:mmu-miR-1a-3p
Biological Process	GO:0016570	histone modification	23	760	2.75134e-05	0.000322033	ENSMUSG00000028736:mmu-miR-1a-3p,ENSMUSG00000033644:mmu-miR-1b-5p,ENSMUSG00000023050:mmu-miR-19a-3p,ENSMUSG00000052565:mmu-miR-1b-5p,ENSMUSG00000023951:mmu-miR-16-5p,ENSMUSG00000023951:mmu-miR-126a-3p,ENSMUSG00000068457:mmu-miR-1b-5p,ENSMUSG00000030350:mmu-miR-1b-5p,ENSMUSG00000054611:mmu-miR-19a-3p,ENSMUSG00000020542:mmu-miR-1a-3p,ENSMUSG00000026313:mmu-miR-1a-3p,ENSMUSG00000002748:mmu-miR-1903,…
Biological Process	GO:0021527	spinal cord association neuron differentiation	4	16	2.75608e-05	0.000322112	ENSMUSG00000028736:mmu-miR-1a-3p,ENSMUSG00000004872:mmu-miR-1a-3p,ENSMUSG00000009900:mmu-miR-16-5p,ENSMUSG00000028717:mmu-miR-126a-3p
Biological Process	GO:0010467	gene expression	179	12172	2.77921e-05	0.000324337	ENSMUSG00000022892:mmu-miR-16-5p,ENSMUSG00000014074:mmu-miR-16-5p,ENSMUSG00000022505:mmu-miR-1903,ENSMUSG00000001855:mmu-let-7i-5p,ENSMUSG00000025860:mmu-miR-451a,ENSMUSG00000038227:mmu-miR-126a-3p,ENSMUSG00000033014:mmu-miR-451a,ENSMUSG00000022346:mmu-miR-451a,ENSMUSG00000000693:mmu-miR-1b-5p,ENSMUSG00000034673:mmu-miR-1903,ENSMUSG00000055980:mmu-miR-126a-3p,ENSMUSG00000033961:mmu-miR-1b-5p,ENSM…
Biological Process	GO:1904950	negative regulation of establishment of protein localization	15	370	2.83058e-05	0.000329846	ENSMUSG00000078680:mmu-miR-1a-3p,ENSMUSG00000031930:mmu-miR-25-3p,ENSMUSG00000020135:mmu-let-7i-5p,ENSMUSG00000055980:mmu-miR-126a-3p,ENSMUSG00000026193:mmu-miR-1a-3p,ENSMUSG00000026193:mmu-miR-140-3p,ENSMUSG00000025746:mmu-let-7i-5p,ENSMUSG00000025746:mmu-miR-142a-3p,ENSMUSG00000073830:mmu-miR-1a-3p,ENSMUSG00000033685:mmu-miR-1a-3p,ENSMUSG00000078673:mmu-miR-1a-3p,ENSMUSG00000073834:mmu-miR-1a-3…
Biological Process	GO:0003006	developmental process involved in reproduction	36	1503	2.84124e-05	0.000330601	ENSMUSG00000070348:mmu-miR-16-5p,ENSMUSG00000023333:mmu-miR-1903,ENSMUSG00000028495:mmu-miR-1a-3p,ENSMUSG00000005268:mmu-miR-1903,ENSMUSG00000033644:mmu-miR-1b-5p,ENSMUSG00000020193:mmu-miR-25-3p,ENSMUSG00000031737:mmu-miR-1a-3p,ENSMUSG00000026915:mmu-miR-1b-5p,ENSMUSG00000052155:mmu-miR-1b-5p,ENSMUSG00000057329:mmu-miR-16-5p,ENSMUSG00000025081:mmu-miR-1b-5p,ENSMUSG00000020053:mmu-miR-1a-3p,ENSMU…
Biological Process	GO:0048638	regulation of developmental growth	18	509	2.8533e-05	0.000331519	ENSMUSG00000022306:mmu-miR-19a-3p,ENSMUSG00000020838:mmu-miR-16-5p,ENSMUSG00000009900:mmu-miR-16-5p,ENSMUSG00000023951:mmu-miR-16-5p,ENSMUSG00000023951:mmu-miR-126a-3p,ENSMUSG00000050953:mmu-miR-1a-3p,ENSMUSG00000026193:mmu-miR-1a-3p,ENSMUSG00000026193:mmu-miR-140-3p,ENSMUSG00000037225:mmu-miR-16-5p,ENSMUSG00000040752:mmu-miR-1a-3p,ENSMUSG00000022892:mmu-miR-16-5p,ENSMUSG00000013663:mmu-miR-19a-3…
Biological Process	GO:0048562	embryonic organ morphogenesis	16	416	2.91739e-05	0.000338468	ENSMUSG00000022346:mmu-miR-451a,ENSMUSG00000038193:mmu-miR-1a-3p,ENSMUSG00000027210:mmu-let-7i-5p,ENSMUSG00000021944:mmu-miR-1a-3p,ENSMUSG00000015605:mmu-miR-1a-3p,ENSMUSG00000017491:mmu-miR-1a-3p,ENSMUSG00000030201:mmu-miR-19a-3p,ENSMUSG00000050953:mmu-miR-1a-3p,ENSMUSG00000054611:mmu-miR-19a-3p,ENSMUSG00000038331:mmu-miR-1b-5p,ENSMUSG00000024563:mmu-miR-140-3p,ENSMUSG00000031737:mmu-miR-1a-3p,E…
Biological Process	GO:0042326	negative regulation of phosphorylation	23	763	2.92349e-05	0.00033868	ENSMUSG00000026313:mmu-miR-1a-3p,ENSMUSG00000020542:mmu-miR-1a-3p,ENSMUSG00000028517:mmu-miR-16-5p,ENSMUSG00000039005:mmu-miR-1b-5p,ENSMUSG00000090935:mmu-miR-1903,ENSMUSG00000005533:mmu-miR-1a-3p,ENSMUSG00000039661:mmu-miR-1903,ENSMUSG00000027351:mmu-miR-144-3p,ENSMUSG00000027351:mmu-miR-126a-3p,ENSMUSG00000046876:mmu-miR-19a-3p,ENSMUSG00000030201:mmu-miR-19a-3p,ENSMUSG00000001175:mmu-miR-1a-3p,…
Biological Process	GO:0010563	negative regulation of phosphorus metabolic process	26	926	2.97828e-05	0.000343521	ENSMUSG00000090935:mmu-miR-1903,ENSMUSG00000039005:mmu-miR-1b-5p,ENSMUSG00000005533:mmu-miR-1a-3p,ENSMUSG00000044647:mmu-miR-1b-5p,ENSMUSG00000028517:mmu-miR-16-5p,ENSMUSG00000020542:mmu-miR-1a-3p,ENSMUSG00000024401:mmu-miR-19a-3p,ENSMUSG00000026313:mmu-miR-1a-3p,ENSMUSG00000027351:mmu-miR-144-3p,ENSMUSG00000027351:mmu-miR-126a-3p,ENSMUSG00000039661:mmu-miR-1903,ENSMUSG00000027951:mmu-miR-1a-3p,E…
Biological Process	GO:0010876	lipid localization	20	609	2.97023e-05	0.000343521	ENSMUSG00000003452:mmu-miR-16-5p,ENSMUSG00000050017:mmu-miR-1b-5p,ENSMUSG00000061665:mmu-miR-142a-3p,ENSMUSG00000027087:mmu-miR-16-5p,ENSMUSG00000078673:mmu-miR-1a-3p,ENSMUSG00000094793:mmu-miR-1a-3p,ENSMUSG00000030201:mmu-miR-19a-3p,ENSMUSG00000022952:mmu-miR-126a-3p,ENSMUSG00000000594:mmu-miR-451a,ENSMUSG00000015243:mmu-miR-144-3p,ENSMUSG00000078680:mmu-miR-1a-3p,ENSMUSG00000033307:mmu-miR-451a…
Biological Process	GO:0045936	negative regulation of phosphate metabolic process	26	926	2.97828e-05	0.000343521	ENSMUSG00000009073:mmu-let-7i-5p,ENSMUSG00000013663:mmu-miR-19a-3p,ENSMUSG00000013663:mmu-miR-19a-3p,ENSMUSG00000013663:mmu-miR-144-3p,ENSMUSG00000028967:mmu-miR-126a-3p,ENSMUSG00000027951:mmu-miR-1a-3p,ENSMUSG00000030201:mmu-miR-19a-3p,ENSMUSG00000046876:mmu-miR-19a-3p,ENSMUSG00000001175:mmu-miR-1a-3p,ENSMUSG00000036438:mmu-miR-1a-3p,ENSMUSG00000020053:mmu-miR-1a-3p,ENSMUSG00000053886:mmu-miR-19…
Biological Process	GO:0006807	nitrogen compound metabolic process	255	18714	3.02576e-05	0.000348017	ENSMUSG00000033644:mmu-miR-1b-5p,ENSMUSG00000023333:mmu-miR-1903,ENSMUSG00000040651:mmu-miR-451a,ENSMUSG00000030744:mmu-miR-1b-5p,ENSMUSG00000057156:mmu-miR-142a-3p,ENSMUSG00000028086:mmu-miR-25-3p,ENSMUSG00000040242:mmu-miR-19a-3p,ENSMUSG00000030525:mmu-miR-19a-3p,ENSMUSG00000078680:mmu-miR-1a-3p,ENSMUSG00000035762:mmu-miR-1b-5p,ENSMUSG00000009900:mmu-miR-16-5p,ENSMUSG00000031433:mmu-miR-1b-5p,E…
Biological Process	GO:0051248	negative regulation of protein metabolic process	49	2328	3.02605e-05	0.000348017	ENSMUSG00000032913:mmu-miR-144-3p,ENSMUSG00000022346:mmu-miR-451a,ENSMUSG00000002111:mmu-miR-126a-3p,ENSMUSG00000058174:mmu-miR-25-3p,ENSMUSG00000025746:mmu-let-7i-5p,ENSMUSG00000025746:mmu-miR-142a-3p,ENSMUSG00000004099:mmu-miR-126a-3p,ENSMUSG00000013663:mmu-miR-19a-3p,ENSMUSG00000013663:mmu-miR-19a-3p,ENSMUSG00000013663:mmu-miR-144-3p,ENSMUSG00000025860:mmu-miR-451a,ENSMUSG00000039449:mmu-miR-1…
Biological Process	GO:0008306	associative learning	9	137	3.0398e-05	0.000348588	ENSMUSG00000021109:mmu-miR-144-3p,ENSMUSG00000015605:mmu-miR-1a-3p,ENSMUSG00000046876:mmu-miR-19a-3p,ENSMUSG00000020423:mmu-miR-25-3p,ENSMUSG00000022892:mmu-miR-16-5p,ENSMUSG00000027273:mmu-miR-19a-3p,ENSMUSG00000029104:mmu-miR-1b-5p,ENSMUSG00000027210:mmu-let-7i-5p,ENSMUSG00000030525:mmu-miR-19a-3p
Biological Process	GO:0061351	neural precursor cell proliferation	12	246	3.03685e-05	0.000348588	ENSMUSG00000020838:mmu-miR-16-5p,ENSMUSG00000009073:mmu-let-7i-5p,ENSMUSG00000020423:mmu-miR-25-3p,ENSMUSG00000009900:mmu-miR-16-5p,ENSMUSG00000021109:mmu-miR-144-3p,ENSMUSG00000048482:mmu-miR-1a-3p,ENSMUSG00000030201:mmu-miR-19a-3p,ENSMUSG00000045515:mmu-miR-140-3p,ENSMUSG00000020053:mmu-miR-1a-3p,ENSMUSG00000023951:mmu-miR-16-5p,ENSMUSG00000023951:mmu-miR-126a-3p,ENSMUSG00000065954:mmu-miR-16-5…
Cellular Component	GO:0000785	chromatin	28	1039	3.05284e-05	0.000349577	ENSMUSG00000027490:mmu-miR-1b-5p,ENSMUSG00000030557:mmu-miR-1a-3p,ENSMUSG00000055204:mmu-miR-451a,ENSMUSG00000015605:mmu-miR-1a-3p,ENSMUSG00000021944:mmu-miR-1a-3p,ENSMUSG00000038193:mmu-miR-1a-3p,ENSMUSG00000022346:mmu-miR-451a,ENSMUSG00000002111:mmu-miR-126a-3p,ENSMUSG00000061665:mmu-miR-142a-3p,ENSMUSG00000006678:mmu-miR-1a-3p,ENSMUSG00000072980:mmu-miR-1b-5p,ENSMUSG00000078619:mmu-miR-1a-3p,E…
Cellular Component	GO:0045211	postsynaptic membrane	13	287	3.09948e-05	0.000354405	ENSMUSG00000030525:mmu-miR-19a-3p,ENSMUSG00000049336:mmu-miR-451a,ENSMUSG00000030465:mmu-miR-1b-5p,ENSMUSG00000039579:mmu-miR-451a,ENSMUSG00000025586:mmu-miR-1a-3p,ENSMUSG00000025586:mmu-miR-25-3p,ENSMUSG00000026251:mmu-miR-19a-3p,ENSMUSG00000035764:mmu-miR-1b-5p,ENSMUSG00000035109:mmu-miR-142a-3p,ENSMUSG00000008590:mmu-miR-1903,ENSMUSG00000013663:mmu-miR-19a-3p,ENSMUSG00000013663:mmu-miR-19a-3p,…
Biological Process	GO:0045637	regulation of myeloid cell differentiation	15	373	3.10513e-05	0.000354539	ENSMUSG00000028717:mmu-miR-126a-3p,ENSMUSG00000027164:mmu-miR-144-3p,ENSMUSG00000038227:mmu-miR-126a-3p,ENSMUSG00000024401:mmu-miR-19a-3p,ENSMUSG00000022952:mmu-miR-126a-3p,ENSMUSG00000066551:mmu-miR-142a-3p,ENSMUSG00000021109:mmu-miR-144-3p,ENSMUSG00000002111:mmu-miR-126a-3p,ENSMUSG00000022346:mmu-miR-451a,ENSMUSG00000026029:mmu-miR-1b-5p,ENSMUSG00000027276:mmu-miR-16-5p,ENSMUSG00000032035:mmu-m…
Biological Process	GO:0002042	cell migration involved in sprouting angiogenesis	6	53	3.15238e-05	0.000359416	ENSMUSG00000003032:mmu-miR-1a-3p,ENSMUSG00000037225:mmu-miR-16-5p,ENSMUSG00000036144:mmu-miR-1a-3p,ENSMUSG00000015605:mmu-miR-1a-3p,ENSMUSG00000028086:mmu-miR-25-3p,ENSMUSG00000023951:mmu-miR-16-5p,ENSMUSG00000023951:mmu-miR-126a-3p
Biological Process	GO:0032269	negative regulation of cellular protein metabolic process	47	2202	3.164e-05	0.000360223	ENSMUSG00000025746:mmu-let-7i-5p,ENSMUSG00000025746:mmu-miR-142a-3p,ENSMUSG00000004099:mmu-miR-126a-3p,ENSMUSG00000058174:mmu-miR-25-3p,ENSMUSG00000032913:mmu-miR-144-3p,ENSMUSG00000002111:mmu-miR-126a-3p,ENSMUSG00000022346:mmu-miR-451a,ENSMUSG00000030201:mmu-miR-19a-3p,ENSMUSG00000039449:mmu-miR-1b-5p,ENSMUSG00000047888:mmu-miR-1b-5p,ENSMUSG00000022892:mmu-miR-16-5p,ENSMUSG00000013663:mmu-miR-19…
Biological Process	GO:0032870	cellular response to hormone stimulus	28	1042	3.21088e-05	0.000364747	ENSMUSG00000050697:mmu-miR-144-3p,ENSMUSG00000050697:mmu-miR-451a,ENSMUSG00000021109:mmu-miR-144-3p,ENSMUSG00000029661:mmu-let-7i-5p,ENSMUSG00000031834:mmu-miR-126a-3p,ENSMUSG00000027712:mmu-miR-1a-3p,ENSMUSG00000026313:mmu-miR-1a-3p,ENSMUSG00000033685:mmu-miR-1a-3p,ENSMUSG00000005533:mmu-miR-1a-3p,ENSMUSG00000005268:mmu-miR-1903,ENSMUSG00000026193:mmu-miR-1a-3p,ENSMUSG00000026193:mmu-miR-140-3p,…
Biological Process	GO:0046890	regulation of lipid biosynthetic process	13	288	3.21294e-05	0.000364747	ENSMUSG00000028086:mmu-miR-25-3p,ENSMUSG00000020053:mmu-miR-1a-3p,ENSMUSG00000035686:mmu-miR-451a,ENSMUSG00000078680:mmu-miR-1a-3p,ENSMUSG00000096688:mmu-miR-1a-3p,ENSMUSG00000096688:mmu-let-7i-5p,ENSMUSG00000094793:mmu-miR-1a-3p,ENSMUSG00000024401:mmu-miR-19a-3p,ENSMUSG00000031483:mmu-miR-16-5p,ENSMUSG00000050697:mmu-miR-144-3p,ENSMUSG00000050697:mmu-miR-451a,ENSMUSG00000073834:mmu-miR-1a-3p,ENS…
Biological Process	GO:1903531	negative regulation of secretion by cell	14	331	3.28981e-05	0.000372939	ENSMUSG00000033685:mmu-miR-1a-3p,ENSMUSG00000073830:mmu-miR-1a-3p,ENSMUSG00000027712:mmu-miR-1a-3p,ENSMUSG00000096688:mmu-miR-1a-3p,ENSMUSG00000096688:mmu-let-7i-5p,ENSMUSG00000094793:mmu-miR-1a-3p,ENSMUSG00000024401:mmu-miR-19a-3p,ENSMUSG00000073834:mmu-miR-1a-3p,ENSMUSG00000073834:mmu-let-7i-5p,ENSMUSG00000078673:mmu-miR-1a-3p,ENSMUSG00000030557:mmu-miR-1a-3p,ENSMUSG00000046314:mmu-miR-1b-5p,EN…
Biological Process	GO:0035914	skeletal muscle cell differentiation	8	107	3.33328e-05	0.000377327	ENSMUSG00000021944:mmu-miR-1a-3p,ENSMUSG00000009900:mmu-miR-16-5p,ENSMUSG00000020542:mmu-miR-1a-3p,ENSMUSG00000020423:mmu-miR-25-3p,ENSMUSG00000004872:mmu-miR-1a-3p,ENSMUSG00000028736:mmu-miR-1a-3p,ENSMUSG00000055116:mmu-miR-142a-3p,ENSMUSG00000022346:mmu-miR-451a
Biological Process	GO:0001823	mesonephros development	9	139	3.4081e-05	0.000385246	ENSMUSG00000022346:mmu-miR-451a,ENSMUSG00000023951:mmu-miR-16-5p,ENSMUSG00000023951:mmu-miR-126a-3p,ENSMUSG00000057329:mmu-miR-16-5p,ENSMUSG00000024563:mmu-miR-140-3p,ENSMUSG00000037225:mmu-miR-16-5p,ENSMUSG00000017491:mmu-miR-1a-3p,ENSMUSG00000022528:mmu-miR-1a-3p,ENSMUSG00000048482:mmu-miR-1a-3p,ENSMUSG00000040289:mmu-miR-451a
Biological Process	GO:0034504	protein localization to nucleus	22	718	3.41388e-05	0.00038535	ENSMUSG00000054387:mmu-miR-16-5p,ENSMUSG00000009900:mmu-miR-16-5p,ENSMUSG00000022528:mmu-miR-1a-3p,ENSMUSG00000024401:mmu-miR-19a-3p,ENSMUSG00000031834:mmu-miR-126a-3p,ENSMUSG00000039005:mmu-miR-1b-5p,ENSMUSG00000024944:mmu-miR-16-5p,ENSMUSG00000037523:mmu-miR-1b-5p,ENSMUSG00000009073:mmu-let-7i-5p,ENSMUSG00000020315:mmu-miR-144-3p,ENSMUSG00000001855:mmu-let-7i-5p,ENSMUSG00000027951:mmu-miR-1a-3p…
Biological Process	GO:0001933	negative regulation of protein phosphorylation	21	667	3.48084e-05	0.000392349	ENSMUSG00000039661:mmu-miR-1903,ENSMUSG00000027351:mmu-miR-144-3p,ENSMUSG00000027351:mmu-miR-126a-3p,ENSMUSG00000020542:mmu-miR-1a-3p,ENSMUSG00000028517:mmu-miR-16-5p,ENSMUSG00000090935:mmu-miR-1903,ENSMUSG00000005533:mmu-miR-1a-3p,ENSMUSG00000039005:mmu-miR-1b-5p,ENSMUSG00000003032:mmu-miR-1a-3p,ENSMUSG00000025746:mmu-let-7i-5p,ENSMUSG00000025746:mmu-miR-142a-3p,ENSMUSG00000058174:mmu-miR-25-3p,…
Biological Process	GO:0071222	cellular response to lipopolysaccharide	14	333	3.51249e-05	0.000395354	ENSMUSG00000027164:mmu-miR-144-3p,ENSMUSG00000039005:mmu-miR-1b-5p,ENSMUSG00000041515:mmu-miR-451a,ENSMUSG00000031392:mmu-miR-142a-3p,ENSMUSG00000017652:mmu-miR-16-5p,ENSMUSG00000024401:mmu-miR-19a-3p,ENSMUSG00000021109:mmu-miR-144-3p,ENSMUSG00000033307:mmu-miR-451a,ENSMUSG00000025586:mmu-miR-1a-3p,ENSMUSG00000025586:mmu-miR-25-3p,ENSMUSG00000026234:mmu-miR-16-5p,ENSMUSG00000026193:mmu-miR-1a-3p,…
Biological Process	GO:0055013	cardiac muscle cell development	8	108	3.56443e-05	0.000400632	ENSMUSG00000015605:mmu-miR-1a-3p,ENSMUSG00000021944:mmu-miR-1a-3p,ENSMUSG00000030557:mmu-miR-1a-3p,ENSMUSG00000020542:mmu-miR-1a-3p,ENSMUSG00000041616:mmu-miR-1a-3p,ENSMUSG00000040752:mmu-miR-1a-3p,ENSMUSG00000020053:mmu-miR-1a-3p,ENSMUSG00000023951:mmu-miR-16-5p,ENSMUSG00000023951:mmu-miR-126a-3p
Biological Process	GO:0003188	heart valve formation	4	17	3.57158e-05	0.000400866	ENSMUSG00000022306:mmu-miR-19a-3p,ENSMUSG00000040289:mmu-miR-451a,ENSMUSG00000057123:mmu-miR-144-3p,ENSMUSG00000021944:mmu-miR-1a-3p
Biological Process	GO:0071260	cellular response to mechanical stimulus	9	140	3.60597e-05	0.000404154	ENSMUSG00000026029:mmu-miR-1b-5p,ENSMUSG00000050953:mmu-miR-1a-3p,ENSMUSG00000026313:mmu-miR-1a-3p,ENSMUSG00000021109:mmu-miR-144-3p,ENSMUSG00000032113:mmu-miR-1b-5p,ENSMUSG00000041616:mmu-miR-1a-3p,ENSMUSG00000039005:mmu-miR-1b-5p,ENSMUSG00000005533:mmu-miR-1a-3p,ENSMUSG00000017652:mmu-miR-16-5p
Biological Process	GO:1902275	regulation of chromatin organization	14	334	3.6287e-05	0.000405555	ENSMUSG00000023951:mmu-miR-16-5p,ENSMUSG00000023951:mmu-miR-126a-3p,ENSMUSG00000002111:mmu-miR-126a-3p,ENSMUSG00000054611:mmu-miR-19a-3p,ENSMUSG00000068457:mmu-miR-1b-5p,ENSMUSG00000033644:mmu-miR-1b-5p,ENSMUSG00000028736:mmu-miR-1a-3p,ENSMUSG00000004099:mmu-miR-126a-3p,ENSMUSG00000028717:mmu-miR-126a-3p,ENSMUSG00000032113:mmu-miR-1b-5p,ENSMUSG00000020593:mmu-miR-1903,ENSMUSG00000000902:mmu-miR-1…
Molecular Function	GO:0016301	kinase activity	34	1400	3.62745e-05	0.000405555	ENSMUSG00000038145:mmu-miR-451a,ENSMUSG00000027665:mmu-miR-1b-5p,ENSMUSG00000005958:mmu-miR-1b-5p,ENSMUSG00000094793:mmu-miR-1a-3p,ENSMUSG00000001175:mmu-miR-1a-3p,ENSMUSG00000022861:mmu-miR-1903,ENSMUSG00000002068:mmu-miR-16-5p,ENSMUSG00000052155:mmu-miR-1b-5p,ENSMUSG00000032788:mmu-miR-1b-5p,ENSMUSG00000036438:mmu-miR-1a-3p,ENSMUSG00000041075:mmu-miR-1a-3p,ENSMUSG00000041075:mmu-miR-126a-3p,ENS…
Biological Process	GO:0070555	response to interleukin-1	11	212	3.70159e-05	0.000413118	ENSMUSG00000032035:mmu-miR-1a-3p,ENSMUSG00000025746:mmu-let-7i-5p,ENSMUSG00000025746:mmu-miR-142a-3p,ENSMUSG00000026193:mmu-miR-1a-3p,ENSMUSG00000026193:mmu-miR-140-3p,ENSMUSG00000022346:mmu-miR-451a,ENSMUSG00000026313:mmu-miR-1a-3p,ENSMUSG00000021109:mmu-miR-144-3p,ENSMUSG00000022528:mmu-miR-1a-3p,ENSMUSG00000066551:mmu-miR-142a-3p,ENSMUSG00000027164:mmu-miR-144-3p,ENSMUSG00000017652:mmu-miR-16-…
Biological Process	GO:0001659	temperature homeostasis	7	80	3.77811e-05	0.000420474	ENSMUSG00000024401:mmu-miR-19a-3p,ENSMUSG00000096688:mmu-miR-1a-3p,ENSMUSG00000096688:mmu-let-7i-5p,ENSMUSG00000094793:mmu-miR-1a-3p,ENSMUSG00000078673:mmu-miR-1a-3p,ENSMUSG00000073834:mmu-miR-1a-3p,ENSMUSG00000073834:mmu-let-7i-5p,ENSMUSG00000078680:mmu-miR-1a-3p,ENSMUSG00000073830:mmu-miR-1a-3p
Biological Process	GO:0035272	exocrine system development	7	80	3.77811e-05	0.000420474	ENSMUSG00000025746:mmu-let-7i-5p,ENSMUSG00000025746:mmu-miR-142a-3p,ENSMUSG00000024401:mmu-miR-19a-3p,ENSMUSG00000026380:mmu-miR-1b-5p,ENSMUSG00000020053:mmu-miR-1a-3p,ENSMUSG00000005533:mmu-miR-1a-3p,ENSMUSG00000030084:mmu-miR-1b-5p,ENSMUSG00000006699:mmu-miR-1a-3p
Biological Process	GO:0097305	response to alcohol	20	620	3.81154e-05	0.000423599	ENSMUSG00000050697:mmu-miR-144-3p,ENSMUSG00000050697:mmu-miR-451a,ENSMUSG00000090877:mmu-miR-1a-3p,ENSMUSG00000039005:mmu-miR-1b-5p,ENSMUSG00000024563:mmu-miR-140-3p,ENSMUSG00000070348:mmu-miR-16-5p,ENSMUSG00000015243:mmu-miR-144-3p,ENSMUSG00000026029:mmu-miR-1b-5p,ENSMUSG00000026193:mmu-miR-1a-3p,ENSMUSG00000026193:mmu-miR-140-3p,ENSMUSG00000030525:mmu-miR-19a-3p,ENSMUSG00000039579:mmu-miR-451a,…
Biological Process	GO:0045843	negative regulation of striated muscle tissue development	6	55	3.90478e-05	0.000432748	ENSMUSG00000020542:mmu-miR-1a-3p,ENSMUSG00000030201:mmu-miR-19a-3p,ENSMUSG00000027852:mmu-miR-1b-5p,ENSMUSG00000048482:mmu-miR-1a-3p,ENSMUSG00000013663:mmu-miR-19a-3p,ENSMUSG00000013663:mmu-miR-19a-3p,ENSMUSG00000013663:mmu-miR-144-3p,ENSMUSG00000050953:mmu-miR-1a-3p
Biological Process	GO:0070584	mitochondrion morphogenesis	6	55	3.90478e-05	0.000432748	ENSMUSG00000078680:mmu-miR-1a-3p,ENSMUSG00000073830:mmu-miR-1a-3p,ENSMUSG00000073834:mmu-miR-1a-3p,ENSMUSG00000073834:mmu-let-7i-5p,ENSMUSG00000078673:mmu-miR-1a-3p,ENSMUSG00000096688:mmu-miR-1a-3p,ENSMUSG00000096688:mmu-let-7i-5p,ENSMUSG00000094793:mmu-miR-1a-3p
Molecular Function	GO:0046872	metal ion binding	111	6810	3.92758e-05	0.000434666	ENSMUSG00000024302:mmu-miR-1b-5p,ENSMUSG00000037259:mmu-miR-1b-5p,ENSMUSG00000005580:mmu-miR-142a-3p,ENSMUSG00000070867:mmu-miR-1903,ENSMUSG00000012428:mmu-miR-1903,ENSMUSG00000025586:mmu-miR-1a-3p,ENSMUSG00000025586:mmu-miR-25-3p,ENSMUSG00000033794:mmu-miR-16-5p,ENSMUSG00000036112:mmu-miR-1903,ENSMUSG00000050953:mmu-miR-1a-3p,ENSMUSG00000049606:mmu-miR-451a,ENSMUSG00000013663:mmu-miR-19a-3p,ENSM…
Biological Process	GO:0071704	organic substance metabolic process	273	20388	3.96526e-05	0.000438225	ENSMUSG00000002068:mmu-miR-16-5p,ENSMUSG00000046876:mmu-miR-19a-3p,ENSMUSG00000005958:mmu-miR-1b-5p,ENSMUSG00000027951:mmu-miR-1a-3p,ENSMUSG00000052155:mmu-miR-1b-5p,ENSMUSG00000020053:mmu-miR-1a-3p,ENSMUSG00000024401:mmu-miR-19a-3p,ENSMUSG00000066551:mmu-miR-142a-3p,ENSMUSG00000054387:mmu-miR-16-5p,ENSMUSG00000054537:mmu-miR-1903,ENSMUSG00000033540:mmu-miR-16-5p,ENSMUSG00000017692:mmu-miR-25-3p,…
Biological Process	GO:0003279	cardiac septum development	9	142	4.03099e-05	0.00044425	ENSMUSG00000022306:mmu-miR-19a-3p,ENSMUSG00000017491:mmu-miR-1a-3p,ENSMUSG00000030201:mmu-miR-19a-3p,ENSMUSG00000022528:mmu-miR-1a-3p,ENSMUSG00000021944:mmu-miR-1a-3p,ENSMUSG00000057123:mmu-miR-144-3p,ENSMUSG00000040289:mmu-miR-451a,ENSMUSG00000054387:mmu-miR-16-5p,ENSMUSG00000027276:mmu-miR-16-5p
Molecular Function	GO:0019199	transmembrane receptor protein kinase activity	9	142	4.03099e-05	0.00044425	ENSMUSG00000052155:mmu-miR-1b-5p,ENSMUSG00000078680:mmu-miR-1a-3p,ENSMUSG00000078673:mmu-miR-1a-3p,ENSMUSG00000073834:mmu-miR-1a-3p,ENSMUSG00000073834:mmu-let-7i-5p,ENSMUSG00000005958:mmu-miR-1b-5p,ENSMUSG00000096688:mmu-miR-1a-3p,ENSMUSG00000096688:mmu-let-7i-5p,ENSMUSG00000094793:mmu-miR-1a-3p,ENSMUSG00000073830:mmu-miR-1a-3p,ENSMUSG00000005533:mmu-miR-1a-3p
Biological Process	GO:0008544	epidermis development	16	428	4.0964e-05	0.000450832	ENSMUSG00000006699:mmu-miR-1a-3p,ENSMUSG00000005533:mmu-miR-1a-3p,ENSMUSG00000022528:mmu-miR-1a-3p,ENSMUSG00000030302:mmu-let-7i-5p,ENSMUSG00000033792:mmu-miR-1b-5p,ENSMUSG00000024401:mmu-miR-19a-3p,ENSMUSG00000048251:mmu-miR-16-5p,ENSMUSG00000033307:mmu-miR-451a,ENSMUSG00000028967:mmu-miR-126a-3p,ENSMUSG00000040289:mmu-miR-451a,ENSMUSG00000022952:mmu-miR-126a-3p,ENSMUSG00000002881:mmu-miR-1903,E…
Biological Process	GO:0071453	cellular response to oxygen levels	13	295	4.11382e-05	0.000452121	ENSMUSG00000033307:mmu-miR-451a,ENSMUSG00000025586:mmu-miR-1a-3p,ENSMUSG00000025586:mmu-miR-25-3p,ENSMUSG00000023951:mmu-miR-16-5p,ENSMUSG00000023951:mmu-miR-126a-3p,ENSMUSG00000027715:mmu-miR-1b-5p,ENSMUSG00000057329:mmu-miR-16-5p,ENSMUSG00000031392:mmu-miR-142a-3p,ENSMUSG00000013663:mmu-miR-19a-3p,ENSMUSG00000013663:mmu-miR-19a-3p,ENSMUSG00000013663:mmu-miR-144-3p,ENSMUSG00000027490:mmu-miR-1b-…
Molecular Function	GO:0098772	molecular function regulator	46	2161	4.12158e-05	0.000452346	ENSMUSG00000026193:mmu-miR-1a-3p,ENSMUSG00000026193:mmu-miR-140-3p,ENSMUSG00000042845:mmu-miR-1b-5p,ENSMUSG00000025531:mmu-miR-25-3p,ENSMUSG00000042203:mmu-miR-1b-5p,ENSMUSG00000023951:mmu-miR-16-5p,ENSMUSG00000023951:mmu-miR-126a-3p,ENSMUSG00000036533:mmu-miR-144-3p,ENSMUSG00000031834:mmu-miR-126a-3p,ENSMUSG00000033792:mmu-miR-1b-5p,ENSMUSG00000002748:mmu-miR-1903,ENSMUSG00000030257:mmu-miR-1b-5…
Biological Process	GO:0044238	primary metabolic process	263	19495	4.13239e-05	0.000452905	ENSMUSG00000040943:mmu-miR-19a-3p,ENSMUSG00000022861:mmu-miR-1903,ENSMUSG00000033658:mmu-miR-16-5p,ENSMUSG00000033658:mmu-miR-451a,ENSMUSG00000006678:mmu-miR-1a-3p,ENSMUSG00000026932:mmu-miR-1b-5p,ENSMUSG00000078619:mmu-miR-1a-3p,ENSMUSG00000027087:mmu-miR-16-5p,ENSMUSG00000034957:mmu-miR-144-3p,ENSMUSG00000026380:mmu-miR-1b-5p,ENSMUSG00000050697:mmu-miR-144-3p,ENSMUSG00000050697:mmu-miR-451a,ENS…
Biological Process	GO:0050878	regulation of body fluid levels	20	625	4.25987e-05	0.000466232	ENSMUSG00000030302:mmu-let-7i-5p,ENSMUSG00000021109:mmu-miR-144-3p,ENSMUSG00000009900:mmu-miR-16-5p,ENSMUSG00000057123:mmu-miR-144-3p,ENSMUSG00000074743:mmu-miR-451a,ENSMUSG00000027712:mmu-miR-1a-3p,ENSMUSG00000033792:mmu-miR-1b-5p,ENSMUSG00000006699:mmu-miR-1a-3p,ENSMUSG00000039005:mmu-miR-1b-5p,ENSMUSG00000041616:mmu-miR-1a-3p,ENSMUSG00000022306:mmu-miR-19a-3p,ENSMUSG00000070348:mmu-miR-16-5p,E…
Biological Process	GO:0010975	regulation of neuron projection development	26	947	4.31972e-05	0.00047213	ENSMUSG00000019647:mmu-miR-142a-3p,ENSMUSG00000015605:mmu-miR-1a-3p,ENSMUSG00000060534:mmu-miR-1903,ENSMUSG00000005958:mmu-miR-1b-5p,ENSMUSG00000048482:mmu-miR-1a-3p,ENSMUSG00000068327:mmu-miR-1a-3p,ENSMUSG00000013663:mmu-miR-19a-3p,ENSMUSG00000013663:mmu-miR-19a-3p,ENSMUSG00000013663:mmu-miR-144-3p,ENSMUSG00000027273:mmu-miR-19a-3p,ENSMUSG00000003452:mmu-miR-16-5p,ENSMUSG00000003032:mmu-miR-1a-3…
Biological Process	GO:0001654	eye development	21	678	4.39995e-05	0.000478918	ENSMUSG00000027276:mmu-miR-16-5p,ENSMUSG00000057329:mmu-miR-16-5p,ENSMUSG00000003032:mmu-miR-1a-3p,ENSMUSG00000027210:mmu-let-7i-5p,ENSMUSG00000052684:mmu-miR-16-5p,ENSMUSG00000009073:mmu-let-7i-5p,ENSMUSG00000030201:mmu-miR-19a-3p,ENSMUSG00000017491:mmu-miR-1a-3p,ENSMUSG00000048482:mmu-miR-1a-3p,ENSMUSG00000015605:mmu-miR-1a-3p,ENSMUSG00000023951:mmu-miR-16-5p,ENSMUSG00000023951:mmu-miR-126a-3p,…
Biological Process	GO:0022407	regulation of cell-cell adhesion	21	678	4.39995e-05	0.000478918	ENSMUSG00000023951:mmu-miR-16-5p,ENSMUSG00000023951:mmu-miR-126a-3p,ENSMUSG00000059921:mmu-miR-144-3p,ENSMUSG00000016496:mmu-miR-16-5p,ENSMUSG00000024401:mmu-miR-19a-3p,ENSMUSG00000028517:mmu-miR-16-5p,ENSMUSG00000066551:mmu-miR-142a-3p,ENSMUSG00000009900:mmu-miR-16-5p,ENSMUSG00000022528:mmu-miR-1a-3p,ENSMUSG00000027164:mmu-miR-144-3p,ENSMUSG00000038696:mmu-miR-16-5p,ENSMUSG00000006699:mmu-miR-1a…
Biological Process	GO:0032101	regulation of response to external stimulus	31	1235	4.39793e-05	0.000478918	ENSMUSG00000013663:mmu-miR-19a-3p,ENSMUSG00000013663:mmu-miR-19a-3p,ENSMUSG00000013663:mmu-miR-144-3p,ENSMUSG00000001175:mmu-miR-1a-3p,ENSMUSG00000021756:mmu-miR-142a-3p,ENSMUSG00000019647:mmu-miR-142a-3p,ENSMUSG00000055204:mmu-miR-451a,ENSMUSG00000032913:mmu-miR-144-3p,ENSMUSG00000030084:mmu-miR-1b-5p,ENSMUSG00000036438:mmu-miR-1a-3p,ENSMUSG00000003032:mmu-miR-1a-3p,ENSMUSG00000032035:mmu-miR-1a…
Biological Process	GO:0044237	cellular metabolic process	265	19689	4.41942e-05	0.000480377	ENSMUSG00000055204:mmu-miR-451a,ENSMUSG00000003282:mmu-miR-1b-5p,ENSMUSG00000021549:mmu-miR-1a-3p,ENSMUSG00000022788:mmu-miR-16-5p,ENSMUSG00000026012:mmu-miR-1b-5p,ENSMUSG00000003032:mmu-miR-1a-3p,ENSMUSG00000026618:mmu-miR-1b-5p,ENSMUSG00000041075:mmu-miR-1a-3p,ENSMUSG00000041075:mmu-miR-126a-3p,ENSMUSG00000092260:mmu-miR-1b-5p,ENSMUSG00000031930:mmu-miR-25-3p,ENSMUSG00000027712:mmu-miR-1a-3p,EN…
Biological Process	GO:0031103	axon regeneration	7	82	4.43384e-05	0.000480923	ENSMUSG00000057329:mmu-miR-16-5p,ENSMUSG00000003032:mmu-miR-1a-3p,ENSMUSG00000052684:mmu-miR-16-5p,ENSMUSG00000032913:mmu-miR-144-3p,ENSMUSG00000033307:mmu-miR-451a,ENSMUSG00000005533:mmu-miR-1a-3p,ENSMUSG00000013663:mmu-miR-19a-3p,ENSMUSG00000013663:mmu-miR-19a-3p,ENSMUSG00000013663:mmu-miR-144-3p
Biological Process	GO:0097190	apoptotic signaling pathway	29	1119	4.43658e-05	0.000480923	ENSMUSG00000089682:mmu-miR-16-5p,ENSMUSG00000021944:mmu-miR-1a-3p,ENSMUSG00000022285:mmu-miR-451a,ENSMUSG00000027490:mmu-miR-1b-5p,ENSMUSG00000013663:mmu-miR-19a-3p,ENSMUSG00000013663:mmu-miR-19a-3p,ENSMUSG00000013663:mmu-miR-144-3p,ENSMUSG00000057329:mmu-miR-16-5p,ENSMUSG00000006678:mmu-miR-1a-3p,ENSMUSG00000029104:mmu-miR-1b-5p,ENSMUSG00000026012:mmu-miR-1b-5p,ENSMUSG00000026932:mmu-miR-1b-5p,E…
Biological Process	GO:0007569	cell aging	10	179	4.47239e-05	0.000484143	ENSMUSG00000015605:mmu-miR-1a-3p,ENSMUSG00000020364:mmu-miR-1b-5p,ENSMUSG00000013663:mmu-miR-19a-3p,ENSMUSG00000013663:mmu-miR-19a-3p,ENSMUSG00000013663:mmu-miR-144-3p,ENSMUSG00000005533:mmu-miR-1a-3p,ENSMUSG00000032113:mmu-miR-1b-5p,ENSMUSG00000029104:mmu-miR-1b-5p,ENSMUSG00000057329:mmu-miR-16-5p,ENSMUSG00000055116:mmu-miR-142a-3p,ENSMUSG00000033307:mmu-miR-451a,ENSMUSG00000021256:mmu-miR-1903
Biological Process	GO:0002684	positive regulation of immune system process	38	1660	4.47856e-05	0.000484148	ENSMUSG00000021756:mmu-miR-142a-3p,ENSMUSG00000013663:mmu-miR-19a-3p,ENSMUSG00000013663:mmu-miR-19a-3p,ENSMUSG00000013663:mmu-miR-144-3p,ENSMUSG00000027276:mmu-miR-16-5p,ENSMUSG00000025746:mmu-let-7i-5p,ENSMUSG00000025746:mmu-miR-142a-3p,ENSMUSG00000032035:mmu-miR-1a-3p,ENSMUSG00000003452:mmu-miR-16-5p,ENSMUSG00000061665:mmu-miR-142a-3p,ENSMUSG00000016496:mmu-miR-16-5p,ENSMUSG00000021109:mmu-miR-…
Biological Process	GO:0046649	lymphocyte activation	31	1237	4.53136e-05	0.000489189	ENSMUSG00000014074:mmu-miR-16-5p,ENSMUSG00000021756:mmu-miR-142a-3p,ENSMUSG00000015605:mmu-miR-1a-3p,ENSMUSG00000041075:mmu-miR-1a-3p,ENSMUSG00000041075:mmu-miR-126a-3p,ENSMUSG00000029816:mmu-miR-1903,ENSMUSG00000027087:mmu-miR-16-5p,ENSMUSG00000002111:mmu-miR-126a-3p,ENSMUSG00000020053:mmu-miR-1a-3p,ENSMUSG00000025746:mmu-let-7i-5p,ENSMUSG00000025746:mmu-miR-142a-3p,ENSMUSG00000057329:mmu-miR-16…
Biological Process	GO:0001977	renal system process involved in regulation of blood volume	4	18	4.55059e-05	0.000489266	ENSMUSG00000030223:mmu-miR-1903,ENSMUSG00000050953:mmu-miR-1a-3p,ENSMUSG00000022505:mmu-miR-1903,ENSMUSG00000057123:mmu-miR-144-3p
Biological Process	GO:0016569	covalent chromatin modification	26	950	4.55045e-05	0.000489266	ENSMUSG00000002748:mmu-miR-1903,ENSMUSG00000026313:mmu-miR-1a-3p,ENSMUSG00000020542:mmu-miR-1a-3p,ENSMUSG00000009555:mmu-miR-1a-3p,ENSMUSG00000050697:mmu-miR-144-3p,ENSMUSG00000050697:mmu-miR-451a,ENSMUSG00000032113:mmu-miR-1b-5p,ENSMUSG00000024384:mmu-miR-1b-5p,ENSMUSG00000000902:mmu-miR-1a-3p,ENSMUSG00000023050:mmu-miR-19a-3p,ENSMUSG00000028736:mmu-miR-1a-3p,ENSMUSG00000033644:mmu-miR-1b-5p,ENS…
Biological Process	GO:0060736	prostate gland growth	4	18	4.55059e-05	0.000489266	ENSMUSG00000005268:mmu-miR-1903,ENSMUSG00000003282:mmu-miR-1b-5p,ENSMUSG00000013663:mmu-miR-19a-3p,ENSMUSG00000013663:mmu-miR-19a-3p,ENSMUSG00000013663:mmu-miR-144-3p,ENSMUSG00000020053:mmu-miR-1a-3p
Biological Process	GO:0008610	lipid biosynthetic process	30	1179	4.57368e-05	0.000491082	ENSMUSG00000078673:mmu-miR-1a-3p,ENSMUSG00000027665:mmu-miR-1b-5p,ENSMUSG00000038641:mmu-miR-142a-3p,ENSMUSG00000094793:mmu-miR-1a-3p,ENSMUSG00000013663:mmu-miR-19a-3p,ENSMUSG00000013663:mmu-miR-19a-3p,ENSMUSG00000013663:mmu-miR-144-3p,ENSMUSG00000020593:mmu-miR-1903,ENSMUSG00000026915:mmu-miR-1b-5p,ENSMUSG00000020053:mmu-miR-1a-3p,ENSMUSG00000020532:mmu-miR-451a,ENSMUSG00000073834:mmu-miR-1a-3p,…
Biological Process	GO:0040017	positive regulation of locomotion	24	840	4.58797e-05	0.000491949	ENSMUSG00000020053:mmu-miR-1a-3p,ENSMUSG00000029816:mmu-miR-1903,ENSMUSG00000027087:mmu-miR-16-5p,ENSMUSG00000022346:mmu-miR-451a,ENSMUSG00000055980:mmu-miR-126a-3p,ENSMUSG00000031555:mmu-miR-126a-3p,ENSMUSG00000052684:mmu-miR-16-5p,ENSMUSG00000057329:mmu-miR-16-5p,ENSMUSG00000032035:mmu-miR-1a-3p,ENSMUSG00000019647:mmu-miR-142a-3p,ENSMUSG00000021756:mmu-miR-142a-3p,ENSMUSG00000050953:mmu-miR-1a-…
Biological Process	GO:0090066	regulation of anatomical structure size	23	786	4.60039e-05	0.000492615	ENSMUSG00000057123:mmu-miR-144-3p,ENSMUSG00000009900:mmu-miR-16-5p,ENSMUSG00000030302:mmu-let-7i-5p,ENSMUSG00000021109:mmu-miR-144-3p,ENSMUSG00000033792:mmu-miR-1b-5p,ENSMUSG00000031834:mmu-miR-126a-3p,ENSMUSG00000090877:mmu-miR-1a-3p,ENSMUSG00000041616:mmu-miR-1a-3p,ENSMUSG00000020838:mmu-miR-16-5p,ENSMUSG00000026193:mmu-miR-1a-3p,ENSMUSG00000026193:mmu-miR-140-3p,ENSMUSG00000050953:mmu-miR-1a-3…
Biological Process	GO:0051235	maintenance of location	19	578	4.62005e-05	0.000494052	ENSMUSG00000096688:mmu-miR-1a-3p,ENSMUSG00000096688:mmu-let-7i-5p,ENSMUSG00000024401:mmu-miR-19a-3p,ENSMUSG00000073834:mmu-miR-1a-3p,ENSMUSG00000073834:mmu-let-7i-5p,ENSMUSG00000041120:mmu-miR-1903,ENSMUSG00000073830:mmu-miR-1a-3p,ENSMUSG00000006699:mmu-miR-1a-3p,ENSMUSG00000024944:mmu-miR-16-5p,ENSMUSG00000000594:mmu-miR-451a,ENSMUSG00000037225:mmu-miR-16-5p,ENSMUSG00000028086:mmu-miR-25-3p,ENSM…
Biological Process	GO:0061448	connective tissue development	16	433	4.70045e-05	0.000501973	ENSMUSG00000021109:mmu-miR-144-3p,ENSMUSG00000033792:mmu-miR-1b-5p,ENSMUSG00000038331:mmu-miR-1b-5p,ENSMUSG00000037225:mmu-miR-16-5p,ENSMUSG00000028736:mmu-miR-1a-3p,ENSMUSG00000009207:mmu-miR-142a-3p,ENSMUSG00000015605:mmu-miR-1a-3p,ENSMUSG00000027665:mmu-miR-1b-5p,ENSMUSG00000017491:mmu-miR-1a-3p,ENSMUSG00000030201:mmu-miR-19a-3p,ENSMUSG00000022952:mmu-miR-126a-3p,ENSMUSG00000053007:mmu-miR-16-…
Biological Process	GO:0022607	cellular component assembly	91	5331	4.71572e-05	0.000502925	ENSMUSG00000026915:mmu-miR-1b-5p,ENSMUSG00000052684:mmu-miR-16-5p,ENSMUSG00000022788:mmu-miR-16-5p,ENSMUSG00000016664:mmu-miR-16-5p,ENSMUSG00000030557:mmu-miR-1a-3p,ENSMUSG00000021549:mmu-miR-1a-3p,ENSMUSG00000041515:mmu-miR-451a,ENSMUSG00000022285:mmu-miR-451a,ENSMUSG00000032076:mmu-miR-16-5p,ENSMUSG00000030744:mmu-miR-1b-5p,ENSMUSG00000005268:mmu-miR-1903,ENSMUSG00000025104:mmu-miR-144-3p,ENSMU…
Cellular Component	GO:0036477	somatodendritic compartment	36	1541	4.74284e-05	0.000505138	ENSMUSG00000028945:mmu-miR-1a-3p,ENSMUSG00000032076:mmu-miR-16-5p,ENSMUSG00000030744:mmu-miR-1b-5p,ENSMUSG00000028495:mmu-miR-1a-3p,ENSMUSG00000030525:mmu-miR-19a-3p,ENSMUSG00000049336:mmu-miR-451a,ENSMUSG00000030223:mmu-miR-1903,ENSMUSG00000027712:mmu-miR-1a-3p,ENSMUSG00000037541:mmu-miR-451a,ENSMUSG00000006699:mmu-miR-1a-3p,ENSMUSG00000029104:mmu-miR-1b-5p,ENSMUSG00000020053:mmu-miR-1a-3p,ENSMU…
Biological Process	GO:0080135	regulation of cellular response to stress	28	1066	4.76768e-05	0.000507102	ENSMUSG00000021944:mmu-miR-1a-3p,ENSMUSG00000014074:mmu-miR-16-5p,ENSMUSG00000013663:mmu-miR-19a-3p,ENSMUSG00000013663:mmu-miR-19a-3p,ENSMUSG00000013663:mmu-miR-144-3p,ENSMUSG00000026932:mmu-miR-1b-5p,ENSMUSG00000003032:mmu-miR-1a-3p,ENSMUSG00000022788:mmu-miR-16-5p,ENSMUSG00000038193:mmu-miR-1a-3p,ENSMUSG00000021256:mmu-miR-1903,ENSMUSG00000032913:mmu-miR-144-3p,ENSMUSG00000022346:mmu-miR-451a,E…
Biological Process	GO:0031952	regulation of protein autophosphorylation	6	57	4.7947e-05	0.000509293	ENSMUSG00000052684:mmu-miR-16-5p,ENSMUSG00000001175:mmu-miR-1a-3p,ENSMUSG00000036438:mmu-miR-1a-3p,ENSMUSG00000028967:mmu-miR-126a-3p,ENSMUSG00000029816:mmu-miR-1903,ENSMUSG00000023951:mmu-miR-16-5p,ENSMUSG00000023951:mmu-miR-126a-3p
Biological Process	GO:0051272	positive regulation of cellular component movement	24	843	4.84972e-05	0.000514447	ENSMUSG00000005533:mmu-miR-1a-3p,ENSMUSG00000026313:mmu-miR-1a-3p,ENSMUSG00000033792:mmu-miR-1b-5p,ENSMUSG00000016496:mmu-miR-16-5p,ENSMUSG00000028517:mmu-miR-16-5p,ENSMUSG00000066551:mmu-miR-142a-3p,ENSMUSG00000021109:mmu-miR-144-3p,ENSMUSG00000033307:mmu-miR-451a,ENSMUSG00000025586:mmu-miR-1a-3p,ENSMUSG00000025586:mmu-miR-25-3p,ENSMUSG00000023951:mmu-miR-16-5p,ENSMUSG00000023951:mmu-miR-126a-3p…
Biological Process	GO:0045787	positive regulation of cell cycle	21	684	4.98783e-05	0.00052839	ENSMUSG00000033644:mmu-miR-1b-5p,ENSMUSG00000070348:mmu-miR-16-5p,ENSMUSG00000033307:mmu-miR-451a,ENSMUSG00000024401:mmu-miR-19a-3p,ENSMUSG00000026349:mmu-miR-16-5p,ENSMUSG00000022528:mmu-miR-1a-3p,ENSMUSG00000066551:mmu-miR-142a-3p,ENSMUSG00000009555:mmu-miR-1a-3p,ENSMUSG00000054387:mmu-miR-16-5p,ENSMUSG00000034563:mmu-miR-1b-5p,ENSMUSG00000028717:mmu-miR-126a-3p,ENSMUSG00000020838:mmu-miR-16-5p…
Molecular Function	GO:0042803	protein homodimerization activity	36	1545	4.99904e-05	0.00052887	ENSMUSG00000030350:mmu-miR-1b-5p,ENSMUSG00000023951:mmu-miR-16-5p,ENSMUSG00000023951:mmu-miR-126a-3p,ENSMUSG00000040752:mmu-miR-1a-3p,ENSMUSG00000023050:mmu-miR-19a-3p,ENSMUSG00000020838:mmu-miR-16-5p,ENSMUSG00000041120:mmu-miR-1903,ENSMUSG00000022528:mmu-miR-1a-3p,ENSMUSG00000049791:mmu-miR-19a-3p,ENSMUSG00000061665:mmu-miR-142a-3p,ENSMUSG00000038193:mmu-miR-1a-3p,ENSMUSG00000003452:mmu-miR-16-5…
Biological Process	GO:0046668	regulation of retinal cell programmed cell death	3	7	5.02882e-05	0.000530604	ENSMUSG00000057329:mmu-miR-16-5p,ENSMUSG00000037225:mmu-miR-16-5p,ENSMUSG00000048482:mmu-miR-1a-3p
Cellular Component	GO:0035867	alphav-beta3 integrin-IGF-1-IGF1R complex	3	7	5.02882e-05	0.000530604	ENSMUSG00000027087:mmu-miR-16-5p,ENSMUSG00000005533:mmu-miR-1a-3p,ENSMUSG00000020053:mmu-miR-1a-3p
Biological Process	GO:0001889	liver development	18	532	5.04803e-05	0.000531923	ENSMUSG00000057329:mmu-miR-16-5p,ENSMUSG00000006678:mmu-miR-1a-3p,ENSMUSG00000052684:mmu-miR-16-5p,ENSMUSG00000022346:mmu-miR-451a,ENSMUSG00000034957:mmu-miR-144-3p,ENSMUSG00000022952:mmu-miR-126a-3p,ENSMUSG00000002068:mmu-miR-16-5p,ENSMUSG00000040943:mmu-miR-19a-3p,ENSMUSG00000027665:mmu-miR-1b-5p,ENSMUSG00000062908:mmu-miR-19a-3p,ENSMUSG00000032076:mmu-miR-16-5p,ENSMUSG00000070348:mmu-miR-16-5p…
Biological Process	GO:0071219	cellular response to molecule of bacterial origin	14	345	5.14752e-05	0.000541685	ENSMUSG00000024401:mmu-miR-19a-3p,ENSMUSG00000021109:mmu-miR-144-3p,ENSMUSG00000027164:mmu-miR-144-3p,ENSMUSG00000017652:mmu-miR-16-5p,ENSMUSG00000041515:mmu-miR-451a,ENSMUSG00000031392:mmu-miR-142a-3p,ENSMUSG00000039005:mmu-miR-1b-5p,ENSMUSG00000015243:mmu-miR-144-3p,ENSMUSG00000025746:mmu-let-7i-5p,ENSMUSG00000025746:mmu-miR-142a-3p,ENSMUSG00000026193:mmu-miR-1a-3p,ENSMUSG00000026193:mmu-miR-14…
Biological Process	GO:0033028	myeloid cell apoptotic process	6	58	5.29674e-05	0.00055665	ENSMUSG00000013663:mmu-miR-19a-3p,ENSMUSG00000013663:mmu-miR-19a-3p,ENSMUSG00000013663:mmu-miR-144-3p,ENSMUSG00000090877:mmu-miR-1a-3p,ENSMUSG00000033307:mmu-miR-451a,ENSMUSG00000066551:mmu-miR-142a-3p,ENSMUSG00000057329:mmu-miR-16-5p,ENSMUSG00000025746:mmu-let-7i-5p,ENSMUSG00000025746:mmu-miR-142a-3p
Biological Process	GO:1900542	regulation of purine nucleotide metabolic process	13	303	5.40614e-05	0.000567394	ENSMUSG00000015243:mmu-miR-144-3p,ENSMUSG00000020053:mmu-miR-1a-3p,ENSMUSG00000036438:mmu-miR-1a-3p,ENSMUSG00000022346:mmu-miR-451a,ENSMUSG00000023951:mmu-miR-16-5p,ENSMUSG00000023951:mmu-miR-126a-3p,ENSMUSG00000033307:mmu-miR-451a,ENSMUSG00000050697:mmu-miR-144-3p,ENSMUSG00000050697:mmu-miR-451a,ENSMUSG00000021109:mmu-miR-144-3p,ENSMUSG00000001175:mmu-miR-1a-3p,ENSMUSG00000033792:mmu-miR-1b-5p,E…
Biological Process	GO:0061008	hepaticobiliary system development	18	535	5.42379e-05	0.000568493	ENSMUSG00000070348:mmu-miR-16-5p,ENSMUSG00000032076:mmu-miR-16-5p,ENSMUSG00000026234:mmu-miR-16-5p,ENSMUSG00000028086:mmu-miR-25-3p,ENSMUSG00000009900:mmu-miR-16-5p,ENSMUSG00000022528:mmu-miR-1a-3p,ENSMUSG00000033792:mmu-miR-1b-5p,ENSMUSG00000033685:mmu-miR-1a-3p,ENSMUSG00000052684:mmu-miR-16-5p,ENSMUSG00000006678:mmu-miR-1a-3p,ENSMUSG00000057329:mmu-miR-16-5p,ENSMUSG00000034957:mmu-miR-144-3p,EN…
Biological Process	GO:0002027	regulation of heart rate	8	115	5.58776e-05	0.000584135	ENSMUSG00000041616:mmu-miR-1a-3p,ENSMUSG00000031737:mmu-miR-1a-3p,ENSMUSG00000057123:mmu-miR-144-3p,ENSMUSG00000054387:mmu-miR-16-5p,ENSMUSG00000001175:mmu-miR-1a-3p,ENSMUSG00000030525:mmu-miR-19a-3p,ENSMUSG00000036438:mmu-miR-1a-3p,ENSMUSG00000040752:mmu-miR-1a-3p
Biological Process	GO:0097306	cellular response to alcohol	8	115	5.58776e-05	0.000584135	ENSMUSG00000020532:mmu-miR-451a,ENSMUSG00000002111:mmu-miR-126a-3p,ENSMUSG00000022346:mmu-miR-451a,ENSMUSG00000003032:mmu-miR-1a-3p,ENSMUSG00000015243:mmu-miR-144-3p,ENSMUSG00000026193:mmu-miR-1a-3p,ENSMUSG00000026193:mmu-miR-140-3p,ENSMUSG00000050697:mmu-miR-144-3p,ENSMUSG00000050697:mmu-miR-451a,ENSMUSG00000030201:mmu-miR-19a-3p
Biological Process	GO:0006275	regulation of DNA replication	11	222	5.62062e-05	0.000586796	ENSMUSG00000026434:mmu-miR-451a,ENSMUSG00000020053:mmu-miR-1a-3p,ENSMUSG00000028086:mmu-miR-25-3p,ENSMUSG00000052684:mmu-miR-16-5p,ENSMUSG00000027715:mmu-miR-1b-5p,ENSMUSG00000025746:mmu-let-7i-5p,ENSMUSG00000025746:mmu-miR-142a-3p,ENSMUSG00000005533:mmu-miR-1a-3p,ENSMUSG00000009073:mmu-let-7i-5p,ENSMUSG00000006699:mmu-miR-1a-3p,ENSMUSG00000055204:mmu-miR-451a,ENSMUSG00000066551:mmu-miR-142a-3p
Biological Process	GO:0007498	mesoderm development	10	184	5.64131e-05	0.000588181	ENSMUSG00000023951:mmu-miR-16-5p,ENSMUSG00000023951:mmu-miR-126a-3p,ENSMUSG00000029104:mmu-miR-1b-5p,ENSMUSG00000024563:mmu-miR-140-3p,ENSMUSG00000052155:mmu-miR-1b-5p,ENSMUSG00000022306:mmu-miR-19a-3p,ENSMUSG00000028717:mmu-miR-126a-3p,ENSMUSG00000009073:mmu-let-7i-5p,ENSMUSG00000068327:mmu-miR-1a-3p,ENSMUSG00000015605:mmu-miR-1a-3p,ENSMUSG00000009900:mmu-miR-16-5p
Biological Process	GO:0030097	hemopoiesis	37	1617	5.70608e-05	0.000592993	ENSMUSG00000027276:mmu-miR-16-5p,ENSMUSG00000025746:mmu-let-7i-5p,ENSMUSG00000025746:mmu-miR-142a-3p,ENSMUSG00000032035:mmu-miR-1a-3p,ENSMUSG00000022346:mmu-miR-451a,ENSMUSG00000002111:mmu-miR-126a-3p,ENSMUSG00000015605:mmu-miR-1a-3p,ENSMUSG00000038227:mmu-miR-126a-3p,ENSMUSG00000023951:mmu-miR-16-5p,ENSMUSG00000023951:mmu-miR-126a-3p,ENSMUSG00000021109:mmu-miR-144-3p,ENSMUSG00000022528:mmu-miR-1…
Biological Process	GO:0045786	negative regulation of cell cycle	24	852	5.7174e-05	0.000592993	ENSMUSG00000032035:mmu-miR-1a-3p,ENSMUSG00000026932:mmu-miR-1b-5p,ENSMUSG00000057329:mmu-miR-16-5p,ENSMUSG00000061665:mmu-miR-142a-3p,ENSMUSG00000022346:mmu-miR-451a,ENSMUSG00000034957:mmu-miR-144-3p,ENSMUSG00000027104:mmu-miR-1b-5p,ENSMUSG00000027104:mmu-miR-451a,ENSMUSG00000029816:mmu-miR-1903,ENSMUSG00000021256:mmu-miR-1903,ENSMUSG00000013663:mmu-miR-19a-3p,ENSMUSG00000013663:mmu-miR-19a-3p,EN…
Biological Process	GO:0061307	cardiac neural crest cell differentiation involved in heart development	4	19	5.7121e-05	0.000592993	ENSMUSG00000038193:mmu-miR-1a-3p,ENSMUSG00000022528:mmu-miR-1a-3p,ENSMUSG00000030201:mmu-miR-19a-3p,ENSMUSG00000027276:mmu-miR-16-5p
Molecular Function	GO:0031996	thioesterase binding	4	19	5.7121e-05	0.000592993	ENSMUSG00000001175:mmu-miR-1a-3p,ENSMUSG00000006699:mmu-miR-1a-3p,ENSMUSG00000036438:mmu-miR-1a-3p,ENSMUSG00000027164:mmu-miR-144-3p
Biological Process	GO:0007568	aging	23	798	5.78103e-05	0.000598809	ENSMUSG00000015605:mmu-miR-1a-3p,ENSMUSG00000028165:mmu-miR-1b-5p,ENSMUSG00000020364:mmu-miR-1b-5p,ENSMUSG00000013663:mmu-miR-19a-3p,ENSMUSG00000013663:mmu-miR-19a-3p,ENSMUSG00000013663:mmu-miR-144-3p,ENSMUSG00000017466:mmu-miR-19a-3p,ENSMUSG00000003452:mmu-miR-16-5p,ENSMUSG00000055980:mmu-miR-126a-3p,ENSMUSG00000052684:mmu-miR-16-5p,ENSMUSG00000029104:mmu-miR-1b-5p,ENSMUSG00000057329:mmu-miR-16-…
Biological Process	GO:0003170	heart valve development	6	59	5.83994e-05	0.000604121	ENSMUSG00000022306:mmu-miR-19a-3p,ENSMUSG00000027276:mmu-miR-16-5p,ENSMUSG00000021944:mmu-miR-1a-3p,ENSMUSG00000054387:mmu-miR-16-5p,ENSMUSG00000057123:mmu-miR-144-3p,ENSMUSG00000040289:mmu-miR-451a
Biological Process	GO:0048146	positive regulation of fibroblast proliferation	9	149	5.86772e-05	0.000606204	ENSMUSG00000026193:mmu-miR-1a-3p,ENSMUSG00000026193:mmu-miR-140-3p,ENSMUSG00000052684:mmu-miR-16-5p,ENSMUSG00000027715:mmu-miR-1b-5p,ENSMUSG00000033307:mmu-miR-451a,ENSMUSG00000022346:mmu-miR-451a,ENSMUSG00000020053:mmu-miR-1a-3p,ENSMUSG00000027852:mmu-miR-1b-5p,ENSMUSG00000021549:mmu-miR-1a-3p,ENSMUSG00000027490:mmu-miR-1b-5p
Biological Process	GO:0008152	metabolic process	283	21391	6.0895e-05	0.000628297	ENSMUSG00000096688:mmu-miR-1a-3p,ENSMUSG00000096688:mmu-let-7i-5p,ENSMUSG00000023050:mmu-miR-19a-3p,ENSMUSG00000042845:mmu-miR-1b-5p,ENSMUSG00000020868:mmu-miR-25-3p,ENSMUSG00000015605:mmu-miR-1a-3p,ENSMUSG00000069053:mmu-miR-144-3p,ENSMUSG00000069053:mmu-miR-25-3p,ENSMUSG00000028165:mmu-miR-1b-5p,ENSMUSG00000021756:mmu-miR-142a-3p,ENSMUSG00000057134:mmu-miR-1b-5p,ENSMUSG00000013878:mmu-miR-1a-3p…
Molecular Function	GO:0001047	core promoter binding	13	307	6.17537e-05	0.000636328	ENSMUSG00000009555:mmu-miR-1a-3p,ENSMUSG00000020542:mmu-miR-1a-3p,ENSMUSG00000022952:mmu-miR-126a-3p,ENSMUSG00000026313:mmu-miR-1a-3p,ENSMUSG00000000902:mmu-miR-1a-3p,ENSMUSG00000027490:mmu-miR-1b-5p,ENSMUSG00000028271:mmu-miR-1a-3p,ENSMUSG00000028717:mmu-miR-126a-3p,ENSMUSG00000003032:mmu-miR-1a-3p,ENSMUSG00000028890:mmu-miR-1b-5p,ENSMUSG00000055116:mmu-miR-142a-3p,ENSMUSG00000002111:mmu-miR-126…
Biological Process	GO:0015980	energy derivation by oxidation of organic compounds	19	591	6.20165e-05	0.000638206	ENSMUSG00000078680:mmu-miR-1a-3p,ENSMUSG00000066551:mmu-miR-142a-3p,ENSMUSG00000073834:mmu-miR-1a-3p,ENSMUSG00000073834:mmu-let-7i-5p,ENSMUSG00000021109:mmu-miR-144-3p,ENSMUSG00000096688:mmu-miR-1a-3p,ENSMUSG00000096688:mmu-let-7i-5p,ENSMUSG00000073830:mmu-miR-1a-3p,ENSMUSG00000055980:mmu-miR-126a-3p,ENSMUSG00000036438:mmu-miR-1a-3p,ENSMUSG00000020053:mmu-miR-1a-3p,ENSMUSG00000022346:mmu-miR-451a…
Biological Process	GO:0010677	negative regulation of cellular carbohydrate metabolic process	8	117	6.31582e-05	0.000649113	ENSMUSG00000073830:mmu-miR-1a-3p,ENSMUSG00000078673:mmu-miR-1a-3p,ENSMUSG00000073834:mmu-miR-1a-3p,ENSMUSG00000073834:mmu-let-7i-5p,ENSMUSG00000094793:mmu-miR-1a-3p,ENSMUSG00000096688:mmu-miR-1a-3p,ENSMUSG00000096688:mmu-let-7i-5p,ENSMUSG00000026313:mmu-miR-1a-3p,ENSMUSG00000078680:mmu-miR-1a-3p,ENSMUSG00000025746:mmu-let-7i-5p,ENSMUSG00000025746:mmu-miR-142a-3p
Biological Process	GO:1901615	organic hydroxy compound metabolic process	23	803	6.34828e-05	0.000651603	ENSMUSG00000013663:mmu-miR-19a-3p,ENSMUSG00000013663:mmu-miR-19a-3p,ENSMUSG00000013663:mmu-miR-144-3p,ENSMUSG00000022892:mmu-miR-16-5p,ENSMUSG00000038641:mmu-miR-142a-3p,ENSMUSG00000001175:mmu-miR-1a-3p,ENSMUSG00000062202:mmu-miR-1903,ENSMUSG00000020053:mmu-miR-1a-3p,ENSMUSG00000032788:mmu-miR-1b-5p,ENSMUSG00000036438:mmu-miR-1a-3p,ENSMUSG00000034957:mmu-miR-144-3p,ENSMUSG00000038193:mmu-miR-1a-3…
Biological Process	GO:0010165	response to X-ray	6	60	6.42673e-05	0.000657951	ENSMUSG00000074743:mmu-miR-451a,ENSMUSG00000021109:mmu-miR-144-3p,ENSMUSG00000070348:mmu-miR-16-5p,ENSMUSG00000032788:mmu-miR-1b-5p,ENSMUSG00000026434:mmu-miR-451a,ENSMUSG00000061665:mmu-miR-142a-3p
Biological Process	GO:1901862	negative regulation of muscle tissue development	6	60	6.42673e-05	0.000657951	ENSMUSG00000013663:mmu-miR-19a-3p,ENSMUSG00000013663:mmu-miR-19a-3p,ENSMUSG00000013663:mmu-miR-144-3p,ENSMUSG00000050953:mmu-miR-1a-3p,ENSMUSG00000027852:mmu-miR-1b-5p,ENSMUSG00000030201:mmu-miR-19a-3p,ENSMUSG00000020542:mmu-miR-1a-3p,ENSMUSG00000048482:mmu-miR-1a-3p
Biological Process	GO:0006606	protein import into nucleus	18	543	6.54973e-05	0.000668815	ENSMUSG00000054387:mmu-miR-16-5p,ENSMUSG00000022528:mmu-miR-1a-3p,ENSMUSG00000009900:mmu-miR-16-5p,ENSMUSG00000024401:mmu-miR-19a-3p,ENSMUSG00000031834:mmu-miR-126a-3p,ENSMUSG00000039005:mmu-miR-1b-5p,ENSMUSG00000037523:mmu-miR-1b-5p,ENSMUSG00000020315:mmu-miR-144-3p,ENSMUSG00000001855:mmu-let-7i-5p,ENSMUSG00000027951:mmu-miR-1a-3p,ENSMUSG00000052684:mmu-miR-16-5p,ENSMUSG00000020135:mmu-let-7i-5p…
Biological Process	GO:0044744	protein targeting to nucleus	18	543	6.54973e-05	0.000668815	ENSMUSG00000027951:mmu-miR-1a-3p,ENSMUSG00000001855:mmu-let-7i-5p,ENSMUSG00000020315:mmu-miR-144-3p,ENSMUSG00000025746:mmu-let-7i-5p,ENSMUSG00000025746:mmu-miR-142a-3p,ENSMUSG00000029104:mmu-miR-1b-5p,ENSMUSG00000052684:mmu-miR-16-5p,ENSMUSG00000020135:mmu-let-7i-5p,ENSMUSG00000041075:mmu-miR-1a-3p,ENSMUSG00000041075:mmu-miR-126a-3p,ENSMUSG00000055116:mmu-miR-142a-3p,ENSMUSG00000020053:mmu-miR-1a…
Biological Process	GO:0042107	cytokine metabolic process	10	188	6.75493e-05	0.000688881	ENSMUSG00000050395:mmu-miR-1903,ENSMUSG00000026012:mmu-miR-1b-5p,ENSMUSG00000025746:mmu-let-7i-5p,ENSMUSG00000025746:mmu-miR-142a-3p,ENSMUSG00000003032:mmu-miR-1a-3p,ENSMUSG00000027164:mmu-miR-144-3p,ENSMUSG00000039005:mmu-miR-1b-5p,ENSMUSG00000028967:mmu-miR-126a-3p,ENSMUSG00000024401:mmu-miR-19a-3p,ENSMUSG00000022967:mmu-let-7i-5p,ENSMUSG00000054387:mmu-miR-16-5p
Biological Process	GO:0003008	system process	73	4067	6.76496e-05	0.000689017	ENSMUSG00000037251:mmu-miR-16-5p,ENSMUSG00000040752:mmu-miR-1a-3p,ENSMUSG00000039579:mmu-miR-451a,ENSMUSG00000033307:mmu-miR-451a,ENSMUSG00000050953:mmu-miR-1a-3p,ENSMUSG00000020542:mmu-miR-1a-3p,ENSMUSG00000049791:mmu-miR-19a-3p,ENSMUSG00000021109:mmu-miR-144-3p,ENSMUSG00000057123:mmu-miR-144-3p,ENSMUSG00000042448:mmu-miR-1b-5p,ENSMUSG00000039005:mmu-miR-1b-5p,ENSMUSG00000029072:mmu-miR-1b-5p,EN…
Biological Process	GO:1902593	single-organism nuclear import	18	545	6.86165e-05	0.000697969	ENSMUSG00000025746:mmu-let-7i-5p,ENSMUSG00000025746:mmu-miR-142a-3p,ENSMUSG00000029104:mmu-miR-1b-5p,ENSMUSG00000052684:mmu-miR-16-5p,ENSMUSG00000020135:mmu-let-7i-5p,ENSMUSG00000041075:mmu-miR-1a-3p,ENSMUSG00000041075:mmu-miR-126a-3p,ENSMUSG00000053293:mmu-miR-451a,ENSMUSG00000055116:mmu-miR-142a-3p,ENSMUSG00000020053:mmu-miR-1a-3p,ENSMUSG00000027951:mmu-miR-1a-3p,ENSMUSG00000001855:mmu-let-7i-5…
Biological Process	GO:0060977	coronary vasculature morphogenesis	5	38	7.03781e-05	0.00071314	ENSMUSG00000023951:mmu-miR-16-5p,ENSMUSG00000023951:mmu-miR-126a-3p,ENSMUSG00000022306:mmu-miR-19a-3p,ENSMUSG00000038193:mmu-miR-1a-3p,ENSMUSG00000021944:mmu-miR-1a-3p,ENSMUSG00000037225:mmu-miR-16-5p
Biological Process	GO:1902893	regulation of pri-miRNA transcription from RNA polymerase II promoter	5	38	7.03781e-05	0.00071314	ENSMUSG00000002111:mmu-miR-126a-3p,ENSMUSG00000015605:mmu-miR-1a-3p,ENSMUSG00000021109:mmu-miR-144-3p,ENSMUSG00000052684:mmu-miR-16-5p,ENSMUSG00000026313:mmu-miR-1a-3p
Molecular Function	GO:0017147	Wnt-protein binding	5	38	7.03781e-05	0.00071314	ENSMUSG00000030201:mmu-miR-19a-3p,ENSMUSG00000070867:mmu-miR-1903,ENSMUSG00000049791:mmu-miR-19a-3p,ENSMUSG00000041075:mmu-miR-1a-3p,ENSMUSG00000041075:mmu-miR-126a-3p,ENSMUSG00000030223:mmu-miR-1903
Biological Process	GO:0014823	response to activity	10	189	7.06083e-05	0.00071456	ENSMUSG00000048482:mmu-miR-1a-3p,ENSMUSG00000050697:mmu-miR-144-3p,ENSMUSG00000050697:mmu-miR-451a,ENSMUSG00000021109:mmu-miR-144-3p,ENSMUSG00000024401:mmu-miR-19a-3p,ENSMUSG00000039005:mmu-miR-1b-5p,ENSMUSG00000025980:mmu-miR-1a-3p,ENSMUSG00000055980:mmu-miR-126a-3p,ENSMUSG00000026193:mmu-miR-1a-3p,ENSMUSG00000026193:mmu-miR-140-3p,ENSMUSG00000004099:mmu-miR-126a-3p,ENSMUSG00000020053:mmu-miR-1a…
Biological Process	GO:0007416	synapse assembly	11	228	7.14005e-05	0.000721655	ENSMUSG00000013663:mmu-miR-19a-3p,ENSMUSG00000013663:mmu-miR-19a-3p,ENSMUSG00000013663:mmu-miR-144-3p,ENSMUSG00000039953:mmu-miR-451a,ENSMUSG00000022892:mmu-miR-16-5p,ENSMUSG00000048482:mmu-miR-1a-3p,ENSMUSG00000005958:mmu-miR-1b-5p,ENSMUSG00000037541:mmu-miR-451a,ENSMUSG00000028184:mmu-miR-451a,ENSMUSG00000032076:mmu-miR-16-5p,ENSMUSG00000027273:mmu-miR-19a-3p,ENSMUSG00000032589:mmu-miR-144-3p,E…
Biological Process	GO:0010632	regulation of epithelial cell migration	14	356	7.1952e-05	0.000726302	ENSMUSG00000066551:mmu-miR-142a-3p,ENSMUSG00000036144:mmu-miR-1a-3p,ENSMUSG00000021109:mmu-miR-144-3p,ENSMUSG00000028517:mmu-miR-16-5p,ENSMUSG00000090935:mmu-miR-1903,ENSMUSG00000022505:mmu-miR-1903,ENSMUSG00000031555:mmu-miR-126a-3p,ENSMUSG00000052684:mmu-miR-16-5p,ENSMUSG00000037225:mmu-miR-16-5p,ENSMUSG00000003032:mmu-miR-1a-3p,ENSMUSG00000032035:mmu-miR-1a-3p,ENSMUSG00000021256:mmu-miR-1903,E…
Biological Process	GO:0042542	response to hydrogen peroxide	13	312	7.26923e-05	0.000732842	ENSMUSG00000030162:mmu-miR-142a-3p,ENSMUSG00000052684:mmu-miR-16-5p,ENSMUSG00000030744:mmu-miR-1b-5p,ENSMUSG00000031555:mmu-miR-126a-3p,ENSMUSG00000032035:mmu-miR-1a-3p,ENSMUSG00000003032:mmu-miR-1a-3p,ENSMUSG00000025746:mmu-let-7i-5p,ENSMUSG00000025746:mmu-miR-142a-3p,ENSMUSG00000057329:mmu-miR-16-5p,ENSMUSG00000048582:mmu-miR-19a-3p,ENSMUSG00000033307:mmu-miR-451a,ENSMUSG00000050697:mmu-miR-144…
Biological Process	GO:0007595	lactation	7	89	7.50412e-05	0.000755561	ENSMUSG00000050953:mmu-miR-1a-3p,ENSMUSG00000023951:mmu-miR-16-5p,ENSMUSG00000023951:mmu-miR-126a-3p,ENSMUSG00000070348:mmu-miR-16-5p,ENSMUSG00000021109:mmu-miR-144-3p,ENSMUSG00000030302:mmu-let-7i-5p,ENSMUSG00000005268:mmu-miR-1903,ENSMUSG00000033792:mmu-miR-1b-5p
Biological Process	GO:0055017	cardiac muscle tissue growth	8	120	7.55455e-05	0.000759673	ENSMUSG00000050953:mmu-miR-1a-3p,ENSMUSG00000020053:mmu-miR-1a-3p,ENSMUSG00000037225:mmu-miR-16-5p,ENSMUSG00000022306:mmu-miR-19a-3p,ENSMUSG00000013663:mmu-miR-19a-3p,ENSMUSG00000013663:mmu-miR-19a-3p,ENSMUSG00000013663:mmu-miR-144-3p,ENSMUSG00000041616:mmu-miR-1a-3p,ENSMUSG00000020542:mmu-miR-1a-3p,ENSMUSG00000021944:mmu-miR-1a-3p
Biological Process	GO:2000177	regulation of neural precursor cell proliferation	9	154	7.5738e-05	0.000760643	ENSMUSG00000037225:mmu-miR-16-5p,ENSMUSG00000023951:mmu-miR-16-5p,ENSMUSG00000023951:mmu-miR-126a-3p,ENSMUSG00000020053:mmu-miR-1a-3p,ENSMUSG00000048482:mmu-miR-1a-3p,ENSMUSG00000009900:mmu-miR-16-5p,ENSMUSG00000021109:mmu-miR-144-3p,ENSMUSG00000020423:mmu-miR-25-3p,ENSMUSG00000009073:mmu-let-7i-5p,ENSMUSG00000020838:mmu-miR-16-5p
Biological Process	GO:0051146	striated muscle cell differentiation	17	500	7.65551e-05	0.000767876	ENSMUSG00000006678:mmu-miR-1a-3p,ENSMUSG00000057329:mmu-miR-16-5p,ENSMUSG00000004872:mmu-miR-1a-3p,ENSMUSG00000020053:mmu-miR-1a-3p,ENSMUSG00000017491:mmu-miR-1a-3p,ENSMUSG00000048482:mmu-miR-1a-3p,ENSMUSG00000030557:mmu-miR-1a-3p,ENSMUSG00000021944:mmu-miR-1a-3p,ENSMUSG00000015605:mmu-miR-1a-3p,ENSMUSG00000062908:mmu-miR-19a-3p,ENSMUSG00000031972:mmu-miR-1a-3p,ENSMUSG00000040752:mmu-miR-1a-3p,EN…
Biological Process	GO:0033138	positive regulation of peptidyl-serine phosphorylation	9	155	7.96073e-05	0.000797482	ENSMUSG00000057329:mmu-miR-16-5p,ENSMUSG00000025746:mmu-let-7i-5p,ENSMUSG00000025746:mmu-miR-142a-3p,ENSMUSG00000033307:mmu-miR-451a,ENSMUSG00000023951:mmu-miR-16-5p,ENSMUSG00000023951:mmu-miR-126a-3p,ENSMUSG00000024401:mmu-miR-19a-3p,ENSMUSG00000027665:mmu-miR-1b-5p,ENSMUSG00000048482:mmu-miR-1a-3p,ENSMUSG00000009900:mmu-miR-16-5p,ENSMUSG00000006699:mmu-miR-1a-3p
Biological Process	GO:0050671	positive regulation of lymphocyte proliferation	13	315	8.00312e-05	0.000800716	ENSMUSG00000057329:mmu-miR-16-5p,ENSMUSG00000026012:mmu-miR-1b-5p,ENSMUSG00000025746:mmu-let-7i-5p,ENSMUSG00000025746:mmu-miR-142a-3p,ENSMUSG00000033307:mmu-miR-451a,ENSMUSG00000020053:mmu-miR-1a-3p,ENSMUSG00000016496:mmu-miR-16-5p,ENSMUSG00000021756:mmu-miR-142a-3p,ENSMUSG00000066551:mmu-miR-142a-3p,ENSMUSG00000022528:mmu-miR-1a-3p,ENSMUSG00000009900:mmu-miR-16-5p,ENSMUSG00000027164:mmu-miR-144-…
Cellular Component	GO:0044424	intracellular part	315	24433	8.09548e-05	0.000808936	ENSMUSG00000055204:mmu-miR-451a,ENSMUSG00000020070:mmu-miR-1b-5p,ENSMUSG00000021549:mmu-miR-1a-3p,ENSMUSG00000068299:mmu-miR-19a-3p,ENSMUSG00000003282:mmu-miR-1b-5p,ENSMUSG00000026618:mmu-miR-1b-5p,ENSMUSG00000041075:mmu-miR-1a-3p,ENSMUSG00000041075:mmu-miR-126a-3p,ENSMUSG00000016664:mmu-miR-16-5p,ENSMUSG00000031930:mmu-miR-25-3p,ENSMUSG00000022788:mmu-miR-16-5p,ENSMUSG00000033855:mmu-miR-126a-3p…
Biological Process	GO:0072009	nephron epithelium development	9	156	8.36413e-05	0.000834727	ENSMUSG00000037225:mmu-miR-16-5p,ENSMUSG00000057329:mmu-miR-16-5p,ENSMUSG00000027276:mmu-miR-16-5p,ENSMUSG00000030223:mmu-miR-1903,ENSMUSG00000022346:mmu-miR-451a,ENSMUSG00000023951:mmu-miR-16-5p,ENSMUSG00000023951:mmu-miR-126a-3p,ENSMUSG00000040289:mmu-miR-451a,ENSMUSG00000022528:mmu-miR-1a-3p,ENSMUSG00000045515:mmu-miR-140-3p
Biological Process	GO:2001233	regulation of apoptotic signaling pathway	21	710	8.42868e-05	0.000840112	ENSMUSG00000013663:mmu-miR-19a-3p,ENSMUSG00000013663:mmu-miR-19a-3p,ENSMUSG00000013663:mmu-miR-144-3p,ENSMUSG00000022285:mmu-miR-451a,ENSMUSG00000089682:mmu-miR-16-5p,ENSMUSG00000021944:mmu-miR-1a-3p,ENSMUSG00000020053:mmu-miR-1a-3p,ENSMUSG00000027087:mmu-miR-16-5p,ENSMUSG00000022346:mmu-miR-451a,ENSMUSG00000006678:mmu-miR-1a-3p,ENSMUSG00000057329:mmu-miR-16-5p,ENSMUSG00000029104:mmu-miR-1b-5p,EN…
Biological Process	GO:0045912	negative regulation of carbohydrate metabolic process	8	122	8.4874e-05	0.000844901	ENSMUSG00000073834:mmu-miR-1a-3p,ENSMUSG00000073834:mmu-let-7i-5p,ENSMUSG00000078673:mmu-miR-1a-3p,ENSMUSG00000094793:mmu-miR-1a-3p,ENSMUSG00000096688:mmu-miR-1a-3p,ENSMUSG00000096688:mmu-let-7i-5p,ENSMUSG00000026313:mmu-miR-1a-3p,ENSMUSG00000073830:mmu-miR-1a-3p,ENSMUSG00000025746:mmu-let-7i-5p,ENSMUSG00000025746:mmu-miR-142a-3p,ENSMUSG00000078680:mmu-miR-1a-3p
Biological Process	GO:0016192	vesicle-mediated transport	45	2163	8.53458e-05	0.000848532	ENSMUSG00000026193:mmu-miR-1a-3p,ENSMUSG00000026193:mmu-miR-140-3p,ENSMUSG00000000001:mmu-miR-451a,ENSMUSG00000073563:mmu-miR-1b-5p,ENSMUSG00000015243:mmu-miR-144-3p,ENSMUSG00000030162:mmu-miR-142a-3p,ENSMUSG00000028136:mmu-miR-19a-3p,ENSMUSG00000028136:mmu-miR-1b-5p,ENSMUSG00000023951:mmu-miR-16-5p,ENSMUSG00000023951:mmu-miR-126a-3p,ENSMUSG00000042203:mmu-miR-1b-5p,ENSMUSG00000026234:mmu-miR-16-…
Biological Process	GO:0070373	negative regulation of ERK1 and ERK2 cascade	7	91	8.64445e-05	0.000858379	ENSMUSG00000039661:mmu-miR-1903,ENSMUSG00000003032:mmu-miR-1a-3p,ENSMUSG00000039005:mmu-miR-1b-5p,ENSMUSG00000090935:mmu-miR-1903,ENSMUSG00000020053:mmu-miR-1a-3p,ENSMUSG00000028967:mmu-miR-126a-3p,ENSMUSG00000013663:mmu-miR-19a-3p,ENSMUSG00000013663:mmu-miR-19a-3p,ENSMUSG00000013663:mmu-miR-144-3p
Biological Process	GO:0071482	cellular response to light stimulus	10	194	8.77302e-05	0.000870055	ENSMUSG00000036112:mmu-miR-1903,ENSMUSG00000022346:mmu-miR-451a,ENSMUSG00000028086:mmu-miR-25-3p,ENSMUSG00000031293:mmu-miR-1903,ENSMUSG00000061665:mmu-miR-142a-3p,ENSMUSG00000036438:mmu-miR-1a-3p,ENSMUSG00000001175:mmu-miR-1a-3p,ENSMUSG00000021109:mmu-miR-144-3p,ENSMUSG00000014074:mmu-miR-16-5p,ENSMUSG00000032113:mmu-miR-1b-5p
Biological Process	GO:0032946	positive regulation of mononuclear cell proliferation	13	318	8.80036e-05	0.000871675	ENSMUSG00000027164:mmu-miR-144-3p,ENSMUSG00000039005:mmu-miR-1b-5p,ENSMUSG00000017652:mmu-miR-16-5p,ENSMUSG00000016496:mmu-miR-16-5p,ENSMUSG00000021756:mmu-miR-142a-3p,ENSMUSG00000066551:mmu-miR-142a-3p,ENSMUSG00000009900:mmu-miR-16-5p,ENSMUSG00000022528:mmu-miR-1a-3p,ENSMUSG00000033307:mmu-miR-451a,ENSMUSG00000020053:mmu-miR-1a-3p,ENSMUSG00000026012:mmu-miR-1b-5p,ENSMUSG00000057329:mmu-miR-16-5p…
Molecular Function	GO:0004672	protein kinase activity	27	1048	8.94759e-05	0.000885153	ENSMUSG00000041075:mmu-miR-1a-3p,ENSMUSG00000041075:mmu-miR-126a-3p,ENSMUSG00000052155:mmu-miR-1b-5p,ENSMUSG00000094793:mmu-miR-1a-3p,ENSMUSG00000019699:mmu-miR-451a,ENSMUSG00000005958:mmu-miR-1b-5p,ENSMUSG00000078673:mmu-miR-1a-3p,ENSMUSG00000027665:mmu-miR-1b-5p,ENSMUSG00000038145:mmu-miR-451a,ENSMUSG00000040242:mmu-miR-19a-3p,ENSMUSG00000078680:mmu-miR-1a-3p,ENSMUSG00000036707:mmu-miR-144-3p,E…
Biological Process	GO:0014033	neural crest cell differentiation	8	123	8.98845e-05	0.000887967	ENSMUSG00000030201:mmu-miR-19a-3p,ENSMUSG00000022528:mmu-miR-1a-3p,ENSMUSG00000021109:mmu-miR-144-3p,ENSMUSG00000019647:mmu-miR-142a-3p,ENSMUSG00000027276:mmu-miR-16-5p,ENSMUSG00000026193:mmu-miR-1a-3p,ENSMUSG00000026193:mmu-miR-140-3p,ENSMUSG00000004872:mmu-miR-1a-3p,ENSMUSG00000038193:mmu-miR-1a-3p
Biological Process	GO:0055123	digestive system development	11	234	8.99846e-05	0.000887967	ENSMUSG00000020053:mmu-miR-1a-3p,ENSMUSG00000024563:mmu-miR-140-3p,ENSMUSG00000057329:mmu-miR-16-5p,ENSMUSG00000005533:mmu-miR-1a-3p,ENSMUSG00000005958:mmu-miR-1b-5p,ENSMUSG00000022528:mmu-miR-1a-3p,ENSMUSG00000021109:mmu-miR-144-3p,ENSMUSG00000021944:mmu-miR-1a-3p,ENSMUSG00000024401:mmu-miR-19a-3p,ENSMUSG00000017491:mmu-miR-1a-3p,ENSMUSG00000020542:mmu-miR-1a-3p
Biological Process	GO:0016049	cell growth	23	823	9.14829e-05	0.00090163	ENSMUSG00000025746:mmu-let-7i-5p,ENSMUSG00000025746:mmu-miR-142a-3p,ENSMUSG00000057329:mmu-miR-16-5p,ENSMUSG00000020053:mmu-miR-1a-3p,ENSMUSG00000030084:mmu-miR-1b-5p,ENSMUSG00000027087:mmu-miR-16-5p,ENSMUSG00000015605:mmu-miR-1a-3p,ENSMUSG00000021944:mmu-miR-1a-3p,ENSMUSG00000019647:mmu-miR-142a-3p,ENSMUSG00000048482:mmu-miR-1a-3p,ENSMUSG00000009073:mmu-let-7i-5p,ENSMUSG00000022892:mmu-miR-16-5p…
Biological Process	GO:0009266	response to temperature stimulus	15	411	9.2429e-05	0.000909823	ENSMUSG00000066551:mmu-miR-142a-3p,ENSMUSG00000034853:mmu-miR-1b-5p,ENSMUSG00000050697:mmu-miR-144-3p,ENSMUSG00000050697:mmu-miR-451a,ENSMUSG00000090877:mmu-miR-1a-3p,ENSMUSG00000031392:mmu-miR-142a-3p,ENSMUSG00000062908:mmu-miR-19a-3p,ENSMUSG00000025980:mmu-miR-1a-3p,ENSMUSG00000040752:mmu-miR-1a-3p,ENSMUSG00000057329:mmu-miR-16-5p,ENSMUSG00000026029:mmu-miR-1b-5p,ENSMUSG00000025746:mmu-let-7i-5…
Biological Process	GO:0006110	regulation of glycolytic process	6	64	9.26156e-05	0.000910529	ENSMUSG00000050697:mmu-miR-144-3p,ENSMUSG00000050697:mmu-miR-451a,ENSMUSG00000021109:mmu-miR-144-3p,ENSMUSG00000026313:mmu-miR-1a-3p,ENSMUSG00000020053:mmu-miR-1a-3p,ENSMUSG00000022346:mmu-miR-451a,ENSMUSG00000033307:mmu-miR-451a
Molecular Function	GO:0008047	enzyme activator activity	23	824	9.3135e-05	0.000914501	ENSMUSG00000021549:mmu-miR-1a-3p,ENSMUSG00000001175:mmu-miR-1a-3p,ENSMUSG00000019775:mmu-miR-1903,ENSMUSG00000027665:mmu-miR-1b-5p,ENSMUSG00000017466:mmu-miR-19a-3p,ENSMUSG00000022892:mmu-miR-16-5p,ENSMUSG00000032413:mmu-miR-1b-5p,ENSMUSG00000006678:mmu-miR-1a-3p,ENSMUSG00000052684:mmu-miR-16-5p,ENSMUSG00000028245:mmu-miR-451a,ENSMUSG00000036438:mmu-miR-1a-3p,ENSMUSG00000020053:mmu-miR-1a-3p,ENSM…
Molecular Function	GO:0004714	transmembrane receptor protein tyrosine kinase activity	8	124	9.51375e-05	0.000933007	ENSMUSG00000078680:mmu-miR-1a-3p,ENSMUSG00000096688:mmu-miR-1a-3p,ENSMUSG00000096688:mmu-let-7i-5p,ENSMUSG00000094793:mmu-miR-1a-3p,ENSMUSG00000078673:mmu-miR-1a-3p,ENSMUSG00000073834:mmu-miR-1a-3p,ENSMUSG00000073834:mmu-let-7i-5p,ENSMUSG00000005958:mmu-miR-1b-5p,ENSMUSG00000073830:mmu-miR-1a-3p,ENSMUSG00000005533:mmu-miR-1a-3p
Biological Process	GO:1901653	cellular response to peptide	18	560	9.65111e-05	0.000945308	ENSMUSG00000005533:mmu-miR-1a-3p,ENSMUSG00000033685:mmu-miR-1a-3p,ENSMUSG00000027712:mmu-miR-1a-3p,ENSMUSG00000031834:mmu-miR-126a-3p,ENSMUSG00000050697:mmu-miR-144-3p,ENSMUSG00000050697:mmu-miR-451a,ENSMUSG00000021109:mmu-miR-144-3p,ENSMUSG00000025586:mmu-miR-1a-3p,ENSMUSG00000025586:mmu-miR-25-3p,ENSMUSG00000026434:mmu-miR-451a,ENSMUSG00000026193:mmu-miR-1a-3p,ENSMUSG00000026193:mmu-miR-140-3p,…
Biological Process	GO:0071478	cellular response to radiation	12	278	9.81737e-05	0.000960406	ENSMUSG00000055980:mmu-miR-126a-3p,ENSMUSG00000026434:mmu-miR-451a,ENSMUSG00000031293:mmu-miR-1903,ENSMUSG00000061665:mmu-miR-142a-3p,ENSMUSG00000036438:mmu-miR-1a-3p,ENSMUSG00000022346:mmu-miR-451a,ENSMUSG00000036112:mmu-miR-1903,ENSMUSG00000028086:mmu-miR-25-3p,ENSMUSG00000021109:mmu-miR-144-3p,ENSMUSG00000001175:mmu-miR-1a-3p,ENSMUSG00000014074:mmu-miR-16-5p,ENSMUSG00000032113:mmu-miR-1b-5p
Biological Process	GO:0003281	ventricular septum development	7	93	9.92213e-05	0.000969457	ENSMUSG00000057123:mmu-miR-144-3p,ENSMUSG00000054387:mmu-miR-16-5p,ENSMUSG00000040289:mmu-miR-451a,ENSMUSG00000021944:mmu-miR-1a-3p,ENSMUSG00000022528:mmu-miR-1a-3p,ENSMUSG00000030201:mmu-miR-19a-3p,ENSMUSG00000022306:mmu-miR-19a-3p
Biological Process	GO:0006140	regulation of nucleotide metabolic process	13	322	9.96967e-05	0.000971706	ENSMUSG00000036438:mmu-miR-1a-3p,ENSMUSG00000020053:mmu-miR-1a-3p,ENSMUSG00000033307:mmu-miR-451a,ENSMUSG00000023951:mmu-miR-16-5p,ENSMUSG00000023951:mmu-miR-126a-3p,ENSMUSG00000022346:mmu-miR-451a,ENSMUSG00000015243:mmu-miR-144-3p,ENSMUSG00000005580:mmu-miR-142a-3p,ENSMUSG00000017466:mmu-miR-19a-3p,ENSMUSG00000050697:mmu-miR-144-3p,ENSMUSG00000050697:mmu-miR-451a,ENSMUSG00000021109:mmu-miR-144-3…
Biological Process	GO:0030856	regulation of epithelial cell differentiation	10	197	9.96017e-05	0.000971706	ENSMUSG00000024401:mmu-miR-19a-3p,ENSMUSG00000022528:mmu-miR-1a-3p,ENSMUSG00000040289:mmu-miR-451a,ENSMUSG00000028967:mmu-miR-126a-3p,ENSMUSG00000027276:mmu-miR-16-5p,ENSMUSG00000005268:mmu-miR-1903,ENSMUSG00000028945:mmu-miR-1a-3p,ENSMUSG00000070348:mmu-miR-16-5p,ENSMUSG00000023951:mmu-miR-16-5p,ENSMUSG00000023951:mmu-miR-126a-3p,ENSMUSG00000055116:mmu-miR-142a-3p
Biological Process	GO:0006941	striated muscle contraction	11	237	0.000100731	0.00097938	ENSMUSG00000036438:mmu-miR-1a-3p,ENSMUSG00000068457:mmu-miR-1b-5p,ENSMUSG00000026251:mmu-miR-19a-3p,ENSMUSG00000040752:mmu-miR-1a-3p,ENSMUSG00000041616:mmu-miR-1a-3p,ENSMUSG00000039005:mmu-miR-1b-5p,ENSMUSG00000057123:mmu-miR-144-3p,ENSMUSG00000021944:mmu-miR-1a-3p,ENSMUSG00000026313:mmu-miR-1a-3p,ENSMUSG00000024401:mmu-miR-19a-3p,ENSMUSG00000001175:mmu-miR-1a-3p
Biological Process	GO:0060840	artery development	8	125	0.000100642	0.00097938	ENSMUSG00000020542:mmu-miR-1a-3p,ENSMUSG00000022528:mmu-miR-1a-3p,ENSMUSG00000015605:mmu-miR-1a-3p,ENSMUSG00000057123:mmu-miR-144-3p,ENSMUSG00000040289:mmu-miR-451a,ENSMUSG00000027276:mmu-miR-16-5p,ENSMUSG00000023951:mmu-miR-16-5p,ENSMUSG00000023951:mmu-miR-126a-3p,ENSMUSG00000038193:mmu-miR-1a-3p
Molecular Function	GO:0043548	phosphatidylinositol 3-kinase binding	6	65	0.000101059	0.00098136	ENSMUSG00000039005:mmu-miR-1b-5p,ENSMUSG00000005533:mmu-miR-1a-3p,ENSMUSG00000036438:mmu-miR-1a-3p,ENSMUSG00000055980:mmu-miR-126a-3p,ENSMUSG00000001175:mmu-miR-1a-3p,ENSMUSG00000031834:mmu-miR-126a-3p
Biological Process	GO:0033197	response to vitamin E	5	41	0.000102158	0.00098961	ENSMUSG00000005533:mmu-miR-1a-3p,ENSMUSG00000033307:mmu-miR-451a,ENSMUSG00000070348:mmu-miR-16-5p,ENSMUSG00000002068:mmu-miR-16-5p,ENSMUSG00000057329:mmu-miR-16-5p
Biological Process	GO:0061311	cell surface receptor signaling pathway involved in heart development	5	41	0.000102158	0.00098961	ENSMUSG00000038193:mmu-miR-1a-3p,ENSMUSG00000009900:mmu-miR-16-5p,ENSMUSG00000040289:mmu-miR-451a,ENSMUSG00000030201:mmu-miR-19a-3p,ENSMUSG00000027276:mmu-miR-16-5p
Cellular Component	GO:0043226	organelle	307	23729	0.000102582	0.0009925	ENSMUSG00000026380:mmu-miR-1b-5p,ENSMUSG00000050697:mmu-miR-144-3p,ENSMUSG00000050697:mmu-miR-451a,ENSMUSG00000044876:mmu-let-7i-5p,ENSMUSG00000022456:mmu-miR-1b-5p,ENSMUSG00000090877:mmu-miR-1a-3p,ENSMUSG00000000902:mmu-miR-1a-3p,ENSMUSG00000020423:mmu-miR-25-3p,ENSMUSG00000031737:mmu-miR-1a-3p,ENSMUSG00000027164:mmu-miR-144-3p,ENSMUSG00000038696:mmu-miR-16-5p,ENSMUSG00000034563:mmu-miR-1b-5p,EN…
Biological Process	GO:0071375	cellular response to peptide hormone stimulus	17	513	0.000104281	0.00100771	ENSMUSG00000055980:mmu-miR-126a-3p,ENSMUSG00000027715:mmu-miR-1b-5p,ENSMUSG00000025746:mmu-let-7i-5p,ENSMUSG00000025746:mmu-miR-142a-3p,ENSMUSG00000020053:mmu-miR-1a-3p,ENSMUSG00000022346:mmu-miR-451a,ENSMUSG00000019699:mmu-miR-451a,ENSMUSG00000028967:mmu-miR-126a-3p,ENSMUSG00000020593:mmu-miR-1903,ENSMUSG00000026193:mmu-miR-1a-3p,ENSMUSG00000026193:mmu-miR-140-3p,ENSMUSG00000026434:mmu-miR-451a,…
Biological Process	GO:0016056	rhodopsin mediated signaling pathway	4	22	0.000104913	0.00101259	ENSMUSG00000001175:mmu-miR-1a-3p,ENSMUSG00000036438:mmu-miR-1a-3p,ENSMUSG00000031293:mmu-miR-1903,ENSMUSG00000036112:mmu-miR-1903
Molecular Function	GO:0003713	transcription coactivator activity	16	465	0.000107828	0.00103945	ENSMUSG00000037225:mmu-miR-16-5p,ENSMUSG00000024921:mmu-miR-142a-3p,ENSMUSG00000000902:mmu-miR-1a-3p,ENSMUSG00000022306:mmu-miR-19a-3p,ENSMUSG00000009900:mmu-miR-16-5p,ENSMUSG00000042292:mmu-miR-1a-3p,ENSMUSG00000020542:mmu-miR-1a-3p,ENSMUSG00000027104:mmu-miR-1b-5p,ENSMUSG00000027104:mmu-miR-451a,ENSMUSG00000034957:mmu-miR-144-3p,ENSMUSG00000038193:mmu-miR-1a-3p,ENSMUSG00000052684:mmu-miR-16-5p,…
Biological Process	GO:0002040	sprouting angiogenesis	9	162	0.000111624	0.00107474	ENSMUSG00000090935:mmu-miR-1903,ENSMUSG00000006699:mmu-miR-1a-3p,ENSMUSG00000015605:mmu-miR-1a-3p,ENSMUSG00000066551:mmu-miR-142a-3p,ENSMUSG00000036144:mmu-miR-1a-3p,ENSMUSG00000023951:mmu-miR-16-5p,ENSMUSG00000023951:mmu-miR-126a-3p,ENSMUSG00000028086:mmu-miR-25-3p,ENSMUSG00000003032:mmu-miR-1a-3p,ENSMUSG00000037225:mmu-miR-16-5p
Biological Process	GO:0031056	regulation of histone modification	12	282	0.000112273	0.00107968	ENSMUSG00000054611:mmu-miR-19a-3p,ENSMUSG00000023951:mmu-miR-16-5p,ENSMUSG00000023951:mmu-miR-126a-3p,ENSMUSG00000002111:mmu-miR-126a-3p,ENSMUSG00000004099:mmu-miR-126a-3p,ENSMUSG00000033644:mmu-miR-1b-5p,ENSMUSG00000028736:mmu-miR-1a-3p,ENSMUSG00000000902:mmu-miR-1a-3p,ENSMUSG00000024384:mmu-miR-1b-5p,ENSMUSG00000020593:mmu-miR-1903,ENSMUSG00000032113:mmu-miR-1b-5p,ENSMUSG00000009555:mmu-miR-1a-…
Biological Process	GO:0033135	regulation of peptidyl-serine phosphorylation	10	200	0.000112806	0.00108086	ENSMUSG00000006699:mmu-miR-1a-3p,ENSMUSG00000024401:mmu-miR-19a-3p,ENSMUSG00000009900:mmu-miR-16-5p,ENSMUSG00000050697:mmu-miR-144-3p,ENSMUSG00000050697:mmu-miR-451a,ENSMUSG00000027665:mmu-miR-1b-5p,ENSMUSG00000048482:mmu-miR-1a-3p,ENSMUSG00000023951:mmu-miR-16-5p,ENSMUSG00000023951:mmu-miR-126a-3p,ENSMUSG00000033307:mmu-miR-451a,ENSMUSG00000025746:mmu-let-7i-5p,ENSMUSG00000025746:mmu-miR-142a-3p…
Biological Process	GO:0044089	positive regulation of cellular component biogenesis	21	725	0.000112576	0.00108086	ENSMUSG00000052684:mmu-miR-16-5p,ENSMUSG00000029104:mmu-miR-1b-5p,ENSMUSG00000028184:mmu-miR-451a,ENSMUSG00000048482:mmu-miR-1a-3p,ENSMUSG00000005958:mmu-miR-1b-5p,ENSMUSG00000015605:mmu-miR-1a-3p,ENSMUSG00000009073:mmu-let-7i-5p,ENSMUSG00000041515:mmu-miR-451a,ENSMUSG00000039953:mmu-miR-451a,ENSMUSG00000030744:mmu-miR-1b-5p,ENSMUSG00000024944:mmu-miR-16-5p,ENSMUSG00000049336:mmu-miR-451a,ENSMUSG…
Biological Process	GO:0070665	positive regulation of leukocyte proliferation	13	326	0.00011271	0.00108086	ENSMUSG00000039005:mmu-miR-1b-5p,ENSMUSG00000017652:mmu-miR-16-5p,ENSMUSG00000027164:mmu-miR-144-3p,ENSMUSG00000066551:mmu-miR-142a-3p,ENSMUSG00000022528:mmu-miR-1a-3p,ENSMUSG00000009900:mmu-miR-16-5p,ENSMUSG00000016496:mmu-miR-16-5p,ENSMUSG00000021756:mmu-miR-142a-3p,ENSMUSG00000020053:mmu-miR-1a-3p,ENSMUSG00000033307:mmu-miR-451a,ENSMUSG00000057329:mmu-miR-16-5p,ENSMUSG00000025746:mmu-let-7i-5p…
Biological Process	GO:0001707	mesoderm formation	7	95	0.000113494	0.00108281	ENSMUSG00000029104:mmu-miR-1b-5p,ENSMUSG00000068327:mmu-miR-1a-3p,ENSMUSG00000024563:mmu-miR-140-3p,ENSMUSG00000015605:mmu-miR-1a-3p,ENSMUSG00000009900:mmu-miR-16-5p,ENSMUSG00000028717:mmu-miR-126a-3p,ENSMUSG00000009073:mmu-let-7i-5p
Biological Process	GO:0060420	regulation of heart growth	7	95	0.000113494	0.00108281	ENSMUSG00000040752:mmu-miR-1a-3p,ENSMUSG00000037225:mmu-miR-16-5p,ENSMUSG00000021944:mmu-miR-1a-3p,ENSMUSG00000022306:mmu-miR-19a-3p,ENSMUSG00000013663:mmu-miR-19a-3p,ENSMUSG00000013663:mmu-miR-19a-3p,ENSMUSG00000013663:mmu-miR-144-3p,ENSMUSG00000050953:mmu-miR-1a-3p,ENSMUSG00000020053:mmu-miR-1a-3p
Biological Process	GO:0060976	coronary vasculature development	7	95	0.000113494	0.00108281	ENSMUSG00000021944:mmu-miR-1a-3p,ENSMUSG00000015605:mmu-miR-1a-3p,ENSMUSG00000037225:mmu-miR-16-5p,ENSMUSG00000020542:mmu-miR-1a-3p,ENSMUSG00000023951:mmu-miR-16-5p,ENSMUSG00000023951:mmu-miR-126a-3p,ENSMUSG00000038193:mmu-miR-1a-3p,ENSMUSG00000022306:mmu-miR-19a-3p
Biological Process	GO:0071822	protein complex subunit organization	50	2524	0.000113556	0.00108281	ENSMUSG00000024563:mmu-miR-140-3p,ENSMUSG00000030744:mmu-miR-1b-5p,ENSMUSG00000024944:mmu-miR-16-5p,ENSMUSG00000026029:mmu-miR-1b-5p,ENSMUSG00000005268:mmu-miR-1903,ENSMUSG00000036707:mmu-miR-144-3p,ENSMUSG00000036707:mmu-miR-451a,ENSMUSG00000025104:mmu-miR-144-3p,ENSMUSG00000050697:mmu-miR-144-3p,ENSMUSG00000050697:mmu-miR-451a,ENSMUSG00000029661:mmu-let-7i-5p,ENSMUSG00000009900:mmu-miR-16-5p,EN…
[truncated: 7,093 more rows]

## Sheet: ADNS_vs_ADF.DEG.GO_enrichment
GO_class	GO ID	GO_term	Hit_number	Background number	P-Value	Q-Value	Gene IDs
[truncated: 8,007 more rows]
